# Supplementary material for: Longitudinal Profiling of Fasting Plasma Metabolome in Response to Weight-Loss Interventions in Patients with Morbid Obesity
Source: MDPI journal article supplement (doi:10.3390/metabo14020116), 2024-02-10
Supplement: s1 [file s1]

## Supplementary Tables

---

Table S1. A full list of baseline plasma metabolites associated with change in FPG before and 1-yr after intervention

Table S2. A full list of baseline plasma metabolites associated with change in HbA1c before and 1-yr after intervention

Table S3. Differential association between changes in metabolites and change in FPG before and 1-yr after intervention

Table S4. Differential association between changes in metabolites and change in HbA1c before and 1-yr after intervention

Table S5. Metabolite modules identified by WGCNA among participants who received RYGB (n=25)

Table S6. Metabolite modules identified by WGCNA among participants who received IMI (n=25)

Table S7. Metabolite modules identified by WGCNA among participants who received BAND (n=25)

Table S8. Module differentially connectivity analysis (MDC) (RYGB vs IMI)

Table S9. Module differentially connectivity analysis (MDC) (RYGB vs BAND)

Table S10. List of metabolites included in the enrichment analysis

Table S11. List of background metabolites included in the enrichment analysis

Table S12. Pathway enrichment for metabolites in the blue module (RYGB vs BAND)

---

**Table S1. A full list of baseline plasma metabolites associated with change in FPG before and 1-yr after intervention**

| Metabolites              | $\beta^*$ (SE) |             |             | $\beta^*$ (SE) |              |               | p-value      |              |               | q-value      |              |               |
|--------------------------|----------------|-------------|-------------|----------------|--------------|---------------|--------------|--------------|---------------|--------------|--------------|---------------|
|                          | IMI            | BAND        | RYGB        | BAND vs. IMI   | RYGB vs. IMI | RYGB vs. BAND | BAND vs. IMI | RYGB vs. IMI | RYGB vs. BAND | BAND vs. IMI | RYGB vs. IMI | RYGB vs. BAND |
| <b>Known</b>             |                |             |             |                |              |               |              |              |               |              |              |               |
| Behenic acid             | 0.11(0.12)     | -0.46(0.22) | 1.78(0.37)  | -0.57(0.25)    | 1.67(0.38)   | 2.24(0.43)    | 2.79E-02     | 4.70E-05     | 2.36E-06      | 9.98E-01     | 4.43E-03     | 3.00E-04      |
| Butane-2,3-diol NIST     | 0.00(0.16)     | -0.33(0.18) | 5.21(1.28)  | -0.32(0.24)    | 5.21(1.28)   | 5.53(1.29)    | 1.80E-01     | 1.30E-04     | 5.97E-05      | 9.98E-01     | 6.36E-03     | 3.22E-03      |
| 3-aminoisobutyric acid   | 0.13(0.16)     | 0.02(0.14)  | 2.09(0.45)  | -0.11(0.22)    | 1.96(0.48)   | 2.07(0.47)    | 6.09E-01     | 1.35E-04     | 4.63E-05      | 9.98E-01     | 6.36E-03     | 3.22E-03      |
| Pyrophosphate            | 1.74(3.15)     | 0.01(0.09)  | 17.38(2.63) | -1.73(3.15)    | 15.64(4.16)  | 17.37(2.63)   | 5.85E-01     | 3.76E-04     | 9.50E-09      | 9.98E-01     | 1.29E-02     | 3.58E-06      |
| Glucose                  | -0.09(0.16)    | -0.13(0.28) | -0.86(0.14) | -0.05(0.33)    | -0.78(0.21)  | -0.73(0.32)   | 8.83E-01     | 4.83E-04     | 2.38E-02      | 9.98E-01     | 1.52E-02     | 1.49E-01      |
| Methionine               | 0.01(0.20)     | -0.05(0.22) | 1.76(0.45)  | -0.06(0.30)    | 1.75(0.49)   | 1.81(0.50)    | 8.51E-01     | 7.16E-04     | 6.16E-04      | 9.98E-01     | 2.08E-02     | 1.66E-02      |
| Hydrocinnamic acid       | 0.09(0.27)     | -0.12(0.15) | 1.88(0.44)  | -0.21(0.31)    | 1.79(0.51)   | 2.00(0.46)    | 5.00E-01     | 8.37E-04     | 4.92E-05      | 9.98E-01     | 2.25E-02     | 3.22E-03      |
| Gluconic acid            | 0.11(0.27)     | 0.14(0.19)  | -0.89(0.14) | 0.03(0.32)     | -1.00(0.30)  | -1.02(0.24)   | 9.34E-01     | 1.48E-03     | 5.27E-05      | 9.98E-01     | 2.92E-02     | 3.22E-03      |
| Alanine                  | -0.10(0.19)    | 0.15(0.20)  | 0.75(0.17)  | 0.25(0.27)     | 0.85(0.26)   | 0.60(0.27)    | 3.65E-01     | 1.55E-03     | 2.67E-02      | 9.98E-01     | 2.92E-02     | 1.60E-01      |
| Creatinine               | 0.09(0.17)     | -0.01(0.18) | 1.15(0.31)  | -0.10(0.23)    | 1.06(0.34)   | 1.16(0.35)    | 6.73E-01     | 2.92E-03     | 1.37E-03      | 9.98E-01     | 4.24E-02     | 3.44E-02      |
| Arachidic acid           | -0.21(0.20)    | 0.24(0.22)  | 0.60(0.17)  | 0.45(0.30)     | 0.81(0.27)   | 0.35(0.28)    | 1.41E-01     | 3.73E-03     | 2.14E-01      | 9.98E-01     | 5.02E-02     | 6.33E-01      |
| Glutamine                | 0.05(0.17)     | -0.08(0.20) | 0.93(0.24)  | -0.13(0.25)    | 0.88(0.30)   | 1.01(0.32)    | 6.08E-01     | 4.54E-03     | 2.38E-03      | 9.98E-01     | 5.55E-02     | 4.09E-02      |
| Valine                   | -0.05(0.21)    | 0.11(0.18)  | 0.80(0.21)  | 0.16(0.28)     | 0.85(0.30)   | 0.69(0.28)    | 5.66E-01     | 5.66E-03     | 1.60E-02      | 9.98E-01     | 6.28E-02     | 1.24E-01      |
| UDP GlcNAc               | 0.10(0.16)     | -0.01(0.21) | 0.87(0.25)  | -0.11(0.27)    | 0.77(0.29)   | 0.88(0.33)    | 6.89E-01     | 9.11E-03     | 1.03E-02      | 9.98E-01     | 8.80E-02     | 9.87E-02      |
| Galactonic acid          | -0.01(0.26)    | 0.13(0.20)  | -0.79(0.15) | 0.14(0.32)     | -0.78(0.30)  | -0.92(0.25)   | 6.68E-01     | 1.03E-02     | 4.01E-04      | 9.98E-01     | 9.21E-02     | 1.37E-02      |
| Glycine                  | 0.16(0.16)     | 0.11(0.23)  | 0.78(0.17)  | -0.04(0.28)    | 0.62(0.24)   | 0.66(0.28)    | 8.83E-01     | 1.18E-02     | 1.96E-02      | 9.98E-01     | 1.03E-01     | 1.33E-01      |
| Mannose                  | -0.09(0.21)    | 0.12(0.22)  | -0.76(0.16) | 0.21(0.29)     | -0.67(0.26)  | -0.88(0.27)   | 4.81E-01     | 1.23E-02     | 1.94E-03      | 9.98E-01     | 1.05E-01     | 4.07E-02      |
| N-methylalanine          | 0.04(0.17)     | -0.23(0.20) | 0.75(0.24)  | -0.27(0.26)    | 0.71(0.29)   | 0.98(0.31)    | 3.12E-01     | 1.71E-02     | 2.83E-03      | 9.98E-01     | 1.29E-01     | 4.45E-02      |
| Salicylic acid           | -0.08(0.56)    | 0.01(0.12)  | 4.44(1.77)  | 0.09(0.57)     | 4.52(1.85)   | 4.44(1.77)    | 8.80E-01     | 1.71E-02     | 1.49E-02      | 9.98E-01     | 1.29E-01     | 1.22E-01      |
| Histidine                | 0.09(0.17)     | -0.20(0.23) | 0.80(0.24)  | -0.29(0.27)    | 0.71(0.29)   | 0.99(0.33)    | 2.98E-01     | 1.84E-02     | 3.84E-03      | 9.98E-01     | 1.36E-01     | 5.36E-02      |
| Glycerol-alpha-phosphate | 0.07(0.19)     | 0.15(0.19)  | 0.71(0.21)  | 0.08(0.26)     | 0.65(0.27)   | 0.56(0.28)    | 7.50E-01     | 2.11E-02     | 4.83E-02      | 9.98E-01     | 1.52E-01     | 2.48E-01      |

|                                                          |             |             |             |             |             |             |          |          |          |          |          |          |
|----------------------------------------------------------|-------------|-------------|-------------|-------------|-------------|-------------|----------|----------|----------|----------|----------|----------|
| 2-hydroxypyrazinyl-<br>2-propenoic acid<br>ethyl ester N | 0.10(0.16)  | 0.10(0.22)  | 0.71(0.21)  | -0.01(0.27) | 0.60(0.27)  | 0.61(0.31)  | 9.80E-01 | 2.78E-02 | 5.10E-02 | 9.98E-01 | 1.77E-01 | 2.50E-01 |
| Phosphate                                                | 0.10(0.17)  | 0.32(0.20)  | 0.72(0.24)  | 0.22(0.25)  | 0.62(0.29)  | 0.40(0.30)  | 3.81E-01 | 3.41E-02 | 1.89E-01 | 9.98E-01 | 2.11E-01 | 6.18E-01 |
| Proline                                                  | 0.04(0.22)  | 0.00(0.18)  | 0.66(0.21)  | -0.05(0.28) | 0.61(0.30)  | 0.66(0.28)  | 8.59E-01 | 4.68E-02 | 2.04E-02 | 9.98E-01 | 2.59E-01 | 1.35E-01 |
| Fructose                                                 | 0.16(0.37)  | 0.20(0.32)  | -0.62(0.16) | 0.03(0.47)  | -0.79(0.40) | -0.82(0.37) | 9.42E-01 | 5.33E-02 | 2.84E-02 | 9.98E-01 | 2.87E-01 | 1.62E-01 |
| Hippuric acid                                            | 0.31(0.39)  | 0.13(0.13)  | -0.71(0.36) | -0.18(0.42) | -1.02(0.52) | -0.84(0.38) | 6.77E-01 | 5.70E-02 | 3.13E-02 | 9.98E-01 | 2.96E-01 | 1.76E-01 |
| Pinitol                                                  | 0.27(0.27)  | 0.91(0.44)  | 1.43(0.54)  | 0.64(0.51)  | 1.16(0.60)  | 0.52(0.70)  | 2.18E-01 | 5.80E-02 | 4.57E-01 | 9.98E-01 | 2.96E-01 | 8.50E-01 |
| Uridine                                                  | 0.00(0.15)  | 0.38(0.27)  | 0.67(0.32)  | 0.38(0.32)  | 0.67(0.35)  | 0.29(0.43)  | 2.37E-01 | 5.98E-02 | 4.96E-01 | 9.98E-01 | 3.00E-01 | 8.74E-01 |
| Pelargonic acid                                          | 0.14(0.19)  | 0.10(0.21)  | 0.66(0.21)  | -0.04(0.28) | 0.52(0.28)  | 0.56(0.30)  | 8.84E-01 | 7.03E-02 | 6.44E-02 | 9.98E-01 | 3.40E-01 | 2.89E-01 |
| 1-monostearin                                            | 0.08(0.15)  | -0.14(0.26) | 0.70(0.31)  | -0.22(0.30) | 0.62(0.35)  | 0.84(0.41)  | 4.65E-01 | 7.80E-02 | 4.29E-02 | 9.98E-01 | 3.72E-01 | 2.28E-01 |
| Hypoxanthine                                             | -0.01(0.24) | 0.00(0.19)  | 0.55(0.21)  | 0.01(0.30)  | 0.57(0.32)  | 0.56(0.28)  | 9.74E-01 | 8.26E-02 | 5.09E-02 | 9.98E-01 | 3.80E-01 | 2.50E-01 |
| Aconitic acid                                            | 0.01(0.25)  | 0.26(0.23)  | -0.50(0.15) | 0.25(0.34)  | -0.51(0.29) | -0.75(0.27) | 4.69E-01 | 8.81E-02 | 8.03E-03 | 9.98E-01 | 3.95E-01 | 9.17E-02 |
| Leucine                                                  | -0.06(0.24) | 0.25(0.19)  | 0.44(0.22)  | 0.32(0.30)  | 0.50(0.32)  | 0.19(0.28)  | 2.89E-01 | 1.15E-01 | 5.10E-01 | 9.98E-01 | 4.83E-01 | 8.85E-01 |
| Isoleucine                                               | -0.08(0.26) | 0.23(0.19)  | 0.45(0.22)  | 0.31(0.32)  | 0.53(0.34)  | 0.22(0.28)  | 3.26E-01 | 1.20E-01 | 4.43E-01 | 9.98E-01 | 4.98E-01 | 8.48E-01 |
| Adenosine-5-<br>monophosphate                            | 0.06(0.18)  | 0.02(0.20)  | 0.57(0.27)  | -0.05(0.26) | 0.50(0.32)  | 0.55(0.33)  | 8.60E-01 | 1.23E-01 | 1.03E-01 | 9.98E-01 | 4.98E-01 | 4.16E-01 |
| N-acetylornithine                                        | 0.07(0.31)  | 0.19(0.18)  | -0.51(0.23) | 0.12(0.35)  | -0.58(0.38) | -0.70(0.28) | 7.35E-01 | 1.27E-01 | 1.56E-02 | 9.98E-01 | 5.09E-01 | 1.24E-01 |
| Dodecanol                                                | 0.05(0.17)  | 0.21(0.21)  | 0.48(0.23)  | 0.15(0.27)  | 0.43(0.29)  | 0.27(0.31)  | 5.70E-01 | 1.42E-01 | 3.80E-01 | 9.98E-01 | 5.49E-01 | 8.10E-01 |
| Phenylethylamine                                         | -0.13(0.24) | 0.10(0.21)  | 0.31(0.18)  | 0.24(0.32)  | 0.44(0.30)  | 0.20(0.27)  | 4.57E-01 | 1.43E-01 | 4.55E-01 | 9.98E-01 | 5.49E-01 | 8.50E-01 |
| Linoleic acid                                            | 0.02(0.22)  | 0.11(0.19)  | -0.43(0.22) | 0.10(0.29)  | -0.45(0.31) | -0.55(0.29) | 7.39E-01 | 1.45E-01 | 6.39E-02 | 9.98E-01 | 5.53E-01 | 2.89E-01 |
| Ketohexose                                               | -0.03(0.12) | 0.59(0.85)  | -1.35(0.94) | 0.62(0.86)  | -1.32(0.95) | -1.94(1.26) | 4.72E-01 | 1.67E-01 | 1.28E-01 | 9.98E-01 | 6.05E-01 | 4.73E-01 |
| Hydroxylamine                                            | 0.12(0.20)  | 0.15(0.18)  | 0.56(0.27)  | 0.03(0.27)  | 0.44(0.33)  | 0.41(0.32)  | 9.21E-01 | 1.85E-01 | 2.06E-01 | 9.98E-01 | 6.57E-01 | 6.33E-01 |
| Lactulose                                                | 0.34(0.47)  | 0.05(0.32)  | -0.30(0.14) | -0.28(0.56) | -0.64(0.48) | -0.35(0.34) | 6.15E-01 | 1.94E-01 | 3.07E-01 | 9.98E-01 | 6.65E-01 | 7.41E-01 |
| Beta-alanine                                             | -0.04(0.18) | 0.26(0.20)  | 0.35(0.24)  | 0.30(0.27)  | 0.39(0.30)  | 0.09(0.31)  | 2.67E-01 | 1.99E-01 | 7.78E-01 | 9.98E-01 | 6.69E-01 | 9.32E-01 |
| N-<br>acetylmannosamine                                  | 0.03(0.29)  | 0.00(0.16)  | -0.47(0.28) | -0.03(0.33) | -0.51(0.39) | -0.47(0.32) | 9.15E-01 | 2.03E-01 | 1.46E-01 | 9.98E-01 | 6.76E-01 | 5.20E-01 |
| Conduritol-beta-<br>expoxide                             | -0.05(0.22) | -0.01(0.18) | 0.34(0.22)  | 0.05(0.29)  | 0.39(0.31)  | 0.34(0.28)  | 8.76E-01 | 2.11E-01 | 2.30E-01 | 9.98E-01 | 6.78E-01 | 6.54E-01 |
| Threonine                                                | 0.23(0.19)  | 0.15(0.20)  | 0.59(0.22)  | -0.08(0.27) | 0.35(0.29)  | 0.43(0.30)  | 7.71E-01 | 2.28E-01 | 1.51E-01 | 9.98E-01 | 7.22E-01 | 5.30E-01 |
| Galactose                                                | -0.15(0.20) | -0.33(0.21) | -0.47(0.18) | -0.18(0.29) | -0.32(0.27) | -0.14(0.27) | 5.39E-01 | 2.39E-01 | 6.15E-01 | 9.98E-01 | 7.43E-01 | 9.16E-01 |

|                               |             |             |             |             |             |             |          |          |          |          |          |          |
|-------------------------------|-------------|-------------|-------------|-------------|-------------|-------------|----------|----------|----------|----------|----------|----------|
| Benzoic acid                  | 0.32(0.49)  | 0.16(0.18)  | 0.96(0.26)  | -0.15(0.52) | 0.64(0.54)  | 0.80(0.31)  | 7.67E-01 | 2.40E-01 | 1.32E-02 | 9.98E-01 | 7.43E-01 | 1.16E-01 |
| Methionine sulfoxide          | 0.20(0.24)  | 0.13(0.19)  | 0.56(0.21)  | -0.07(0.28) | 0.36(0.32)  | 0.43(0.28)  | 8.05E-01 | 2.69E-01 | 1.32E-01 | 9.98E-01 | 8.00E-01 | 4.84E-01 |
| Oxamic acid                   | 0.12(0.23)  | 0.06(0.17)  | -0.28(0.29) | -0.06(0.28) | -0.40(0.36) | -0.34(0.33) | 8.30E-01 | 2.71E-01 | 3.09E-01 | 9.98E-01 | 8.00E-01 | 7.41E-01 |
| 3-hydroxybutyric acid         | 0.06(0.27)  | 0.01(0.20)  | -0.30(0.19) | -0.05(0.34) | -0.35(0.32) | -0.30(0.28) | 8.76E-01 | 2.78E-01 | 2.81E-01 | 9.98E-01 | 8.00E-01 | 7.20E-01 |
| Sucrose                       | 2.91(2.69)  | 0.04(0.27)  | -0.04(0.13) | -2.87(2.71) | -2.94(2.69) | -0.08(0.31) | 2.94E-01 | 2.78E-01 | 8.06E-01 | 9.98E-01 | 8.00E-01 | 9.43E-01 |
| Phenylalanine                 | 0.05(0.21)  | 0.21(0.22)  | 0.35(0.20)  | 0.15(0.30)  | 0.30(0.29)  | 0.15(0.29)  | 6.16E-01 | 3.01E-01 | 6.12E-01 | 9.98E-01 | 8.33E-01 | 9.16E-01 |
| Cysteine-glycine              | 0.29(0.31)  | 0.27(0.23)  | -0.05(0.16) | -0.02(0.38) | -0.34(0.34) | -0.32(0.27) | 9.52E-01 | 3.19E-01 | 2.45E-01 | 9.98E-01 | 8.52E-01 | 6.68E-01 |
| Nonadecanoic acid             | 0.05(0.14)  | -0.31(0.45) | -0.24(0.27) | -0.36(0.47) | -0.29(0.30) | 0.07(0.52)  | 4.49E-01 | 3.34E-01 | 8.99E-01 | 9.98E-01 | 8.75E-01 | 9.77E-01 |
| Oleic acid                    | 0.02(0.27)  | 0.05(0.19)  | -0.31(0.20) | 0.03(0.32)  | -0.32(0.34) | -0.36(0.27) | 9.20E-01 | 3.37E-01 | 1.95E-01 | 9.98E-01 | 8.75E-01 | 6.28E-01 |
| Indole-3-acetate              | -0.10(0.22) | -0.03(0.18) | 0.46(0.55)  | 0.06(0.29)  | 0.56(0.59)  | 0.49(0.58)  | 8.22E-01 | 3.47E-01 | 3.97E-01 | 9.98E-01 | 8.75E-01 | 8.18E-01 |
| Pyruvic acid                  | 0.03(0.23)  | 0.19(0.21)  | 0.31(0.18)  | 0.16(0.31)  | 0.27(0.29)  | 0.12(0.28)  | 6.14E-01 | 3.54E-01 | 6.81E-01 | 9.98E-01 | 8.75E-01 | 9.29E-01 |
| Indole-3-lactate              | 0.03(0.22)  | 0.14(0.27)  | 0.28(0.16)  | 0.11(0.35)  | 0.25(0.27)  | 0.14(0.32)  | 7.64E-01 | 3.64E-01 | 6.50E-01 | 9.98E-01 | 8.75E-01 | 9.22E-01 |
| Tagatose                      | 0.01(0.39)  | 0.09(0.39)  | -0.35(0.15) | 0.08(0.55)  | -0.37(0.42) | -0.45(0.42) | 8.84E-01 | 3.83E-01 | 2.90E-01 | 9.98E-01 | 9.08E-01 | 7.23E-01 |
| Lauric acid                   | 0.05(0.25)  | 0.21(0.18)  | 0.36(0.26)  | 0.16(0.31)  | 0.32(0.36)  | 0.15(0.32)  | 6.01E-01 | 3.89E-01 | 6.34E-01 | 9.98E-01 | 9.11E-01 | 9.17E-01 |
| 2-piperidinobenzonitrile NIST | 0.11(0.21)  | 0.07(0.18)  | -0.20(0.31) | -0.04(0.27) | -0.31(0.36) | -0.27(0.36) | 8.94E-01 | 4.03E-01 | 4.52E-01 | 9.98E-01 | 9.26E-01 | 8.50E-01 |
| 2-hydroxyglutaric acid        | -0.08(0.22) | 0.23(0.22)  | 0.15(0.18)  | 0.31(0.31)  | 0.23(0.28)  | -0.08(0.28) | 3.25E-01 | 4.16E-01 | 7.86E-01 | 9.98E-01 | 9.31E-01 | 9.32E-01 |
| Tyrosine                      | 0.07(0.23)  | 0.07(0.24)  | 0.30(0.17)  | -0.00(0.33) | 0.23(0.29)  | 0.23(0.29)  | 9.96E-01 | 4.30E-01 | 4.36E-01 | 9.98E-01 | 9.31E-01 | 8.47E-01 |
| Isocitric acid                | 0.06(0.17)  | 0.15(0.20)  | -0.24(0.34) | 0.09(0.26)  | -0.29(0.37) | -0.38(0.39) | 7.25E-01 | 4.36E-01 | 3.25E-01 | 9.98E-01 | 9.31E-01 | 7.43E-01 |
| Deoxycholic acid              | -0.03(0.17) | 0.15(0.29)  | 0.19(0.22)  | 0.17(0.32)  | 0.21(0.27)  | 0.04(0.36)  | 5.90E-01 | 4.40E-01 | 9.15E-01 | 9.98E-01 | 9.31E-01 | 9.83E-01 |
| N-acetylglycine NIST          | 0.09(0.20)  | 0.03(0.20)  | 0.32(0.21)  | -0.07(0.28) | 0.23(0.29)  | 0.29(0.29)  | 8.14E-01 | 4.40E-01 | 3.18E-01 | 9.98E-01 | 9.31E-01 | 7.41E-01 |
| Cysteine                      | 0.03(0.22)  | 0.06(0.33)  | 0.24(0.16)  | 0.03(0.38)  | 0.21(0.27)  | 0.18(0.36)  | 9.35E-01 | 4.43E-01 | 6.19E-01 | 9.98E-01 | 9.31E-01 | 9.16E-01 |
| Kynurenine                    | 0.10(0.14)  | 0.22(0.36)  | 0.35(0.29)  | 0.12(0.39)  | 0.25(0.32)  | 0.13(0.48)  | 7.70E-01 | 4.44E-01 | 7.81E-01 | 9.98E-01 | 9.31E-01 | 9.32E-01 |
| Tryptophan                    | 0.01(0.21)  | -0.06(0.22) | 0.26(0.26)  | -0.07(0.29) | 0.25(0.33)  | 0.32(0.34)  | 8.24E-01 | 4.46E-01 | 3.46E-01 | 9.98E-01 | 9.31E-01 | 7.67E-01 |
| N-acetylglutamate             | 0.11(0.22)  | 0.08(0.18)  | -0.15(0.26) | -0.03(0.28) | -0.26(0.34) | -0.23(0.32) | 9.22E-01 | 4.52E-01 | 4.71E-01 | 9.98E-01 | 9.31E-01 | 8.54E-01 |
| Xylose                        | -0.13(0.51) | 0.37(0.25)  | -0.53(0.20) | 0.49(0.56)  | -0.41(0.55) | -0.90(0.33) | 3.87E-01 | 4.62E-01 | 7.84E-03 | 9.98E-01 | 9.31E-01 | 9.17E-02 |
| Palmitoleic acid              | 0.09(0.37)  | 0.08(0.17)  | -0.22(0.22) | -0.01(0.40) | -0.31(0.43) | -0.30(0.28) | 9.72E-01 | 4.63E-01 | 2.83E-01 | 9.98E-01 | 9.31E-01 | 7.20E-01 |

|                                        |             |             |             |             |             |             |          |          |          |          |          |          |
|----------------------------------------|-------------|-------------|-------------|-------------|-------------|-------------|----------|----------|----------|----------|----------|----------|
| Cystine                                | -0.02(0.23) | -0.15(0.21) | 0.21(0.23)  | -0.12(0.31) | 0.23(0.32)  | 0.36(0.32)  | 6.88E-01 | 4.75E-01 | 2.63E-01 | 9.98E-01 | 9.31E-01 | 6.88E-01 |
| 1,5-anhydroglucitol                    | 0.17(0.24)  | 0.24(0.21)  | 0.40(0.22)  | 0.07(0.31)  | 0.23(0.33)  | 0.17(0.30)  | 8.32E-01 | 4.77E-01 | 5.81E-01 | 9.98E-01 | 9.31E-01 | 9.04E-01 |
| Asparagine                             | 0.17(0.25)  | 0.06(0.19)  | 0.38(0.18)  | -0.11(0.31) | 0.22(0.30)  | 0.32(0.26)  | 7.32E-01 | 4.77E-01 | 2.18E-01 | 9.98E-01 | 9.31E-01 | 6.33E-01 |
| Myristic acid                          | 0.21(0.25)  | 0.15(0.17)  | 0.44(0.23)  | -0.06(0.30) | 0.23(0.33)  | 0.30(0.28)  | 8.31E-01 | 4.85E-01 | 3.00E-01 | 9.98E-01 | 9.31E-01 | 7.39E-01 |
| Shikimic acid                          | -0.03(0.19) | -0.33(0.16) | 0.39(0.56)  | -0.31(0.24) | 0.41(0.61)  | 0.72(0.59)  | 2.14E-01 | 5.01E-01 | 2.29E-01 | 9.98E-01 | 9.31E-01 | 6.54E-01 |
| Erythritol                             | 0.12(0.30)  | 0.19(0.28)  | -0.10(0.15) | 0.07(0.41)  | -0.23(0.34) | -0.29(0.31) | 8.69E-01 | 5.04E-01 | 3.54E-01 | 9.98E-01 | 9.31E-01 | 7.70E-01 |
| Phosphoethanolamine                    | 0.15(0.19)  | 0.20(0.21)  | 0.35(0.24)  | 0.05(0.28)  | 0.20(0.29)  | 0.15(0.32)  | 8.69E-01 | 5.04E-01 | 6.33E-01 | 9.98E-01 | 9.31E-01 | 9.17E-01 |
| Hydroxyproline<br>dipeptide NIST       | 0.06(0.17)  | 0.13(0.25)  | -0.15(0.26) | 0.07(0.30)  | -0.20(0.31) | -0.28(0.36) | 8.08E-01 | 5.12E-01 | 4.42E-01 | 9.98E-01 | 9.31E-01 | 8.48E-01 |
| Dehydroabiatic acid                    | 0.07(0.22)  | 0.60(0.43)  | 0.29(0.25)  | 0.53(0.48)  | 0.21(0.33)  | -0.32(0.49) | 2.75E-01 | 5.19E-01 | 5.24E-01 | 9.98E-01 | 9.31E-01 | 8.92E-01 |
| Isothreonic acid                       | 0.03(0.36)  | 0.40(0.27)  | -0.22(0.14) | 0.37(0.45)  | -0.25(0.40) | -0.62(0.31) | 4.14E-01 | 5.25E-01 | 4.94E-02 | 9.98E-01 | 9.31E-01 | 2.48E-01 |
| Oxalic acid                            | 0.06(0.20)  | 0.06(0.18)  | -0.19(0.35) | -0.00(0.26) | -0.25(0.39) | -0.24(0.39) | 9.98E-01 | 5.28E-01 | 5.28E-01 | 9.98E-01 | 9.31E-01 | 8.92E-01 |
| Methanolphosphate                      | -0.02(0.17) | 0.10(0.22)  | -0.22(0.27) | 0.11(0.28)  | -0.20(0.32) | -0.31(0.36) | 6.81E-01 | 5.31E-01 | 3.82E-01 | 9.98E-01 | 9.31E-01 | 8.10E-01 |
| Threonic acid                          | 0.00(0.31)  | 0.08(0.17)  | -0.23(0.24) | 0.08(0.35)  | -0.23(0.37) | -0.31(0.29) | 8.24E-01 | 5.34E-01 | 2.93E-01 | 9.98E-01 | 9.31E-01 | 7.27E-01 |
| Caprylic acid                          | 0.13(0.28)  | 0.22(0.24)  | 0.33(0.16)  | 0.08(0.36)  | 0.19(0.31)  | 0.11(0.29)  | 8.17E-01 | 5.35E-01 | 7.00E-01 | 9.98E-01 | 9.31E-01 | 9.29E-01 |
| Citric acid                            | 0.12(0.18)  | 0.18(0.20)  | 0.33(0.30)  | 0.06(0.26)  | 0.21(0.34)  | 0.15(0.35)  | 8.25E-01 | 5.37E-01 | 6.67E-01 | 9.98E-01 | 9.31E-01 | 9.22E-01 |
| Oxoproline                             | 0.16(0.22)  | 0.23(0.21)  | 0.33(0.19)  | 0.07(0.29)  | 0.17(0.28)  | 0.10(0.28)  | 8.02E-01 | 5.39E-01 | 7.21E-01 | 9.98E-01 | 9.31E-01 | 9.29E-01 |
| 2,4-diaminobutyric<br>acid             | 0.12(0.22)  | 0.01(0.22)  | 0.29(0.19)  | -0.11(0.30) | 0.17(0.28)  | 0.28(0.29)  | 7.15E-01 | 5.53E-01 | 3.40E-01 | 9.98E-01 | 9.31E-01 | 7.58E-01 |
| Naproxen                               | 0.03(0.18)  | 0.37(1.46)  | -0.12(0.16) | 0.34(1.47)  | -0.14(0.24) | -0.49(1.47) | 8.15E-01 | 5.55E-01 | 7.42E-01 | 9.98E-01 | 9.31E-01 | 9.29E-01 |
| Xylitol                                | 0.25(0.21)  | 0.07(0.17)  | 0.03(0.30)  | -0.17(0.26) | -0.21(0.36) | -0.04(0.33) | 5.15E-01 | 5.56E-01 | 9.07E-01 | 9.98E-01 | 9.31E-01 | 9.77E-01 |
| Fucose                                 | -0.01(0.26) | 0.18(0.23)  | -0.20(0.17) | 0.19(0.35)  | -0.19(0.31) | -0.38(0.28) | 5.89E-01 | 5.58E-01 | 1.91E-01 | 9.98E-01 | 9.31E-01 | 6.22E-01 |
| 4-<br>hydroxyphenylacetic<br>acid      | 0.18(0.28)  | 0.10(0.29)  | 0.00(0.15)  | -0.08(0.40) | -0.18(0.32) | -0.11(0.33) | 8.44E-01 | 5.64E-01 | 7.51E-01 | 9.98E-01 | 9.31E-01 | 9.30E-01 |
| Lysine                                 | 0.09(0.20)  | 0.08(0.24)  | 0.27(0.24)  | -0.00(0.31) | 0.18(0.31)  | 0.18(0.34)  | 9.88E-01 | 5.67E-01 | 5.88E-01 | 9.98E-01 | 9.31E-01 | 9.04E-01 |
| 2,3-<br>dihydroxybutanoic<br>acid NIST | 0.12(0.17)  | 0.06(0.26)  | -0.04(0.22) | -0.06(0.31) | -0.16(0.28) | -0.10(0.35) | 8.52E-01 | 5.72E-01 | 7.70E-01 | 9.98E-01 | 9.31E-01 | 9.32E-01 |
| Pyrrole-2-carboxylic<br>acid           | 0.10(0.19)  | 0.07(0.19)  | -0.10(0.30) | -0.03(0.27) | -0.20(0.35) | -0.17(0.35) | 9.02E-01 | 5.73E-01 | 6.40E-01 | 9.98E-01 | 9.31E-01 | 9.17E-01 |
| Ornithine                              | 0.11(0.22)  | 0.07(0.21)  | 0.28(0.19)  | -0.04(0.30) | 0.16(0.29)  | 0.20(0.28)  | 8.95E-01 | 5.76E-01 | 4.62E-01 | 9.98E-01 | 9.31E-01 | 8.50E-01 |

|                                               |             |             |             |             |             |             |          |          |          |          |          |          |
|-----------------------------------------------|-------------|-------------|-------------|-------------|-------------|-------------|----------|----------|----------|----------|----------|----------|
| Glyceric acid                                 | -0.04(0.17) | 0.19(0.23)  | 0.12(0.25)  | 0.23(0.29)  | 0.16(0.30)  | -0.06(0.33) | 4.27E-01 | 5.85E-01 | 8.46E-01 | 9.98E-01 | 9.42E-01 | 9.46E-01 |
| Palmitic acid                                 | 0.09(0.21)  | 0.07(0.23)  | -0.06(0.20) | -0.02(0.31) | -0.16(0.29) | -0.14(0.31) | 9.50E-01 | 5.90E-01 | 6.62E-01 | 9.98E-01 | 9.46E-01 | 9.22E-01 |
| Hexitol                                       | -0.12(0.21) | -0.06(0.16) | -0.32(0.32) | 0.06(0.27)  | -0.20(0.37) | -0.26(0.36) | 8.10E-01 | 5.97E-01 | 4.62E-01 | 9.98E-01 | 9.50E-01 | 8.50E-01 |
| Lactic acid                                   | -0.16(0.29) | -0.07(0.33) | 0.02(0.16)  | 0.09(0.45)  | 0.17(0.34)  | 0.08(0.36)  | 8.49E-01 | 6.12E-01 | 8.16E-01 | 9.98E-01 | 9.56E-01 | 9.44E-01 |
| Arachidonic acid                              | 0.05(0.23)  | 0.00(0.23)  | -0.10(0.18) | -0.05(0.31) | -0.15(0.29) | -0.10(0.29) | 8.81E-01 | 6.13E-01 | 7.32E-01 | 9.98E-01 | 9.56E-01 | 9.29E-01 |
| Malic acid                                    | 0.37(0.49)  | 0.31(0.64)  | 0.11(0.12)  | -0.06(0.80) | -0.25(0.50) | -0.20(0.65) | 9.45E-01 | 6.15E-01 | 7.63E-01 | 9.98E-01 | 9.56E-01 | 9.32E-01 |
| 3,6-anhydro-D-galactose                       | -0.09(0.37) | 0.11(0.28)  | -0.30(0.15) | 0.20(0.47)  | -0.21(0.41) | -0.41(0.31) | 6.75E-01 | 6.16E-01 | 1.99E-01 | 9.98E-01 | 9.56E-01 | 6.33E-01 |
| Acetaminophen                                 | 0.37(0.48)  | 0.11(0.19)  | 0.14(0.17)  | -0.25(0.52) | -0.22(0.51) | 0.03(0.25)  | 6.28E-01 | 6.64E-01 | 9.04E-01 | 9.98E-01 | 9.74E-01 | 9.77E-01 |
| Ethanolamine                                  | 0.14(0.22)  | 0.39(0.25)  | 0.02(0.18)  | 0.25(0.33)  | -0.12(0.28) | -0.37(0.31) | 4.53E-01 | 6.65E-01 | 2.36E-01 | 9.98E-01 | 9.74E-01 | 6.59E-01 |
| 1-monopalmitin                                | 0.13(0.23)  | 0.09(0.17)  | 0.28(0.24)  | -0.04(0.28) | 0.14(0.33)  | 0.18(0.29)  | 8.78E-01 | 6.67E-01 | 5.31E-01 | 9.98E-01 | 9.74E-01 | 8.92E-01 |
| Tocopherol gamma-Serine                       | 0.18(0.22)  | 0.18(0.20)  | 0.31(0.26)  | 0.01(0.29)  | 0.13(0.33)  | 0.13(0.32)  | 9.81E-01 | 6.91E-01 | 7.00E-01 | 9.98E-01 | 9.74E-01 | 9.29E-01 |
| Parabanic acid NIST                           | 0.22(0.19)  | 0.16(0.23)  | 0.33(0.21)  | -0.07(0.30) | 0.11(0.28)  | 0.18(0.31)  | 8.18E-01 | 6.97E-01 | 5.69E-01 | 9.98E-01 | 9.74E-01 | 9.04E-01 |
| Tocopherol alpha-2-deoxyisotetronic acid NIST | 0.11(0.24)  | 0.04(0.17)  | -0.03(0.27) | -0.07(0.28) | -0.14(0.35) | -0.07(0.32) | 8.06E-01 | 7.02E-01 | 8.36E-01 | 9.98E-01 | 9.74E-01 | 9.46E-01 |
| Alloxanoic acid NIST                          | -0.03(0.21) | 0.14(0.20)  | 0.12(0.33)  | 0.17(0.29)  | 0.14(0.38)  | -0.02(0.38) | 5.60E-01 | 7.06E-01 | 9.50E-01 | 9.98E-01 | 9.74E-01 | 9.94E-01 |
| Pseudo uridine                                | -0.01(0.20) | 0.10(0.25)  | -0.11(0.20) | 0.10(0.32)  | -0.11(0.29) | -0.21(0.32) | 7.46E-01 | 7.09E-01 | 5.03E-01 | 9.98E-01 | 9.74E-01 | 8.77E-01 |
| Succinic acid                                 | 0.14(0.28)  | 0.05(0.16)  | -0.02(0.34) | -0.09(0.31) | -0.16(0.42) | -0.07(0.37) | 7.76E-01 | 7.12E-01 | 8.55E-01 | 9.98E-01 | 9.74E-01 | 9.51E-01 |
| Quinic acid                                   | 0.09(0.24)  | 0.12(0.23)  | 0.20(0.17)  | 0.03(0.33)  | 0.11(0.30)  | 0.08(0.29)  | 9.36E-01 | 7.19E-01 | 7.79E-01 | 9.98E-01 | 9.74E-01 | 9.32E-01 |
| Arabitol                                      | 0.12(0.18)  | 0.34(0.28)  | 0.03(0.21)  | 0.22(0.32)  | -0.09(0.27) | -0.31(0.34) | 5.07E-01 | 7.25E-01 | 3.67E-01 | 9.98E-01 | 9.74E-01 | 7.92E-01 |
| Cellobiose minor                              | 0.24(0.22)  | 0.16(0.19)  | 0.36(0.25)  | -0.08(0.30) | 0.12(0.33)  | 0.20(0.31)  | 7.87E-01 | 7.25E-01 | 5.30E-01 | 9.98E-01 | 9.74E-01 | 8.92E-01 |
| Mannitol                                      | 0.20(0.29)  | 0.06(0.32)  | 0.08(0.15)  | -0.13(0.43) | -0.11(0.33) | 0.02(0.35)  | 7.59E-01 | 7.29E-01 | 9.57E-01 | 9.98E-01 | 9.74E-01 | 9.95E-01 |
| Pipecolinic acid                              | 0.07(0.18)  | 0.01(0.24)  | 0.17(0.23)  | -0.07(0.29) | 0.10(0.29)  | 0.16(0.33)  | 8.25E-01 | 7.32E-01 | 6.17E-01 | 9.98E-01 | 9.74E-01 | 9.16E-01 |
| Pentadecanoic acid                            | 0.07(0.37)  | -0.91(0.57) | -0.06(0.13) | -0.98(0.67) | -0.13(0.39) | 0.85(0.59)  | 1.47E-01 | 7.43E-01 | 1.52E-01 | 9.98E-01 | 9.80E-01 | 5.30E-01 |
| Trans-4-hydroxyproline                        | 0.25(0.27)  | -0.07(0.24) | 0.15(0.16)  | -0.32(0.36) | -0.10(0.31) | 0.22(0.28)  | 3.78E-01 | 7.53E-01 | 4.43E-01 | 9.98E-01 | 9.82E-01 | 8.48E-01 |
| Glutamic acid                                 | -0.29(0.23) | -0.04(0.25) | -0.20(0.17) | 0.25(0.34)  | 0.09(0.28)  | -0.16(0.30) | 4.67E-01 | 7.65E-01 | 5.83E-01 | 9.98E-01 | 9.92E-01 | 9.04E-01 |
| Sorbitol                                      | 0.19(0.25)  | -0.02(0.24) | 0.28(0.17)  | -0.21(0.34) | 0.09(0.30)  | 0.30(0.29)  | 5.37E-01 | 7.73E-01 | 3.10E-01 | 9.98E-01 | 9.94E-01 | 7.41E-01 |
|                                               | -0.02(0.20) | -0.17(0.25) | -0.10(0.19) | -0.15(0.31) | -0.08(0.27) | 0.07(0.31)  | 6.40E-01 | 7.83E-01 | 8.16E-01 | 9.98E-01 | 9.94E-01 | 9.44E-01 |
|                                               | 0.02(0.41)  | -0.11(4.31) | -0.09(0.13) | -0.13(4.32) | -0.12(0.43) | 0.01(4.31)  | 9.76E-01 | 7.86E-01 | 9.97E-01 | 9.98E-01 | 9.94E-01 | 9.98E-01 |

|                           |             |             |             |             |             |             |          |          |          |          |          |          |
|---------------------------|-------------|-------------|-------------|-------------|-------------|-------------|----------|----------|----------|----------|----------|----------|
| Cholesterol               | 0.17(0.35)  | 0.20(0.15)  | 0.29(0.29)  | 0.04(0.38)  | 0.12(0.45)  | 0.08(0.33)  | 9.21E-01 | 7.91E-01 | 8.08E-01 | 9.98E-01 | 9.94E-01 | 9.43E-01 |
| Myo-inositol              | 0.13(0.28)  | 0.20(0.28)  | 0.05(0.16)  | 0.07(0.39)  | -0.08(0.32) | -0.15(0.32) | 8.64E-01 | 7.96E-01 | 6.44E-01 | 9.98E-01 | 9.94E-01 | 9.20E-01 |
| Capric acid               | 0.30(0.42)  | 0.27(0.23)  | 0.18(0.17)  | -0.03(0.48) | -0.11(0.45) | -0.08(0.28) | 9.48E-01 | 7.98E-01 | 7.70E-01 | 9.98E-01 | 9.94E-01 | 9.32E-01 |
| 2-deoxytetronic acid      | 0.26(0.21)  | 0.34(0.24)  | 0.33(0.20)  | 0.08(0.31)  | 0.07(0.29)  | -0.01(0.31) | 7.86E-01 | 8.02E-01 | 9.72E-01 | 9.98E-01 | 9.94E-01 | 9.95E-01 |
| Allantoic acid            | -0.04(0.20) | -0.22(0.27) | 0.09(0.51)  | -0.18(0.34) | 0.13(0.55)  | 0.32(0.58)  | 5.90E-01 | 8.10E-01 | 5.86E-01 | 9.98E-01 | 9.94E-01 | 9.04E-01 |
| 2-hydroxyvaleric acid     | 0.09(0.37)  | -0.10(0.21) | -0.01(0.22) | -0.19(0.43) | -0.10(0.43) | 0.09(0.30)  | 6.59E-01 | 8.24E-01 | 7.55E-01 | 9.98E-01 | 9.94E-01 | 9.30E-01 |
| Glycolic acid             | 0.03(0.16)  | 0.05(0.30)  | 0.11(0.30)  | 0.02(0.33)  | 0.07(0.34)  | 0.05(0.43)  | 9.48E-01 | 8.29E-01 | 9.04E-01 | 9.98E-01 | 9.94E-01 | 9.77E-01 |
| UDP-glucuronic acid       | 0.31(0.70)  | -0.02(0.38) | 0.17(0.13)  | -0.33(0.80) | -0.14(0.72) | 0.19(0.40)  | 6.82E-01 | 8.43E-01 | 6.37E-01 | 9.98E-01 | 9.94E-01 | 9.17E-01 |
| Allantoin                 | 1.39(2.19)  | 0.11(0.17)  | 0.95(0.21)  | -1.27(2.20) | -0.44(2.20) | 0.84(0.27)  | 5.64E-01 | 8.43E-01 | 2.66E-03 | 9.98E-01 | 9.94E-01 | 4.36E-02 |
| Maltose                   | 0.04(0.17)  | 0.10(0.25)  | 0.10(0.22)  | 0.06(0.30)  | 0.06(0.28)  | -0.01(0.34) | 8.32E-01 | 8.44E-01 | 9.82E-01 | 9.98E-01 | 9.94E-01 | 9.95E-01 |
| Maltotriose               | 0.14(0.26)  | 0.05(0.19)  | 0.20(0.20)  | -0.09(0.31) | 0.06(0.32)  | 0.15(0.27)  | 7.83E-01 | 8.50E-01 | 5.91E-01 | 9.98E-01 | 9.94E-01 | 9.06E-01 |
| 2-hydroxybutanoic acid    | -0.33(0.26) | -0.14(0.21) | -0.38(0.17) | 0.19(0.33)  | -0.06(0.31) | -0.24(0.28) | 5.79E-01 | 8.56E-01 | 3.90E-01 | 9.98E-01 | 9.94E-01 | 8.12E-01 |
| Aspartic acid             | 0.12(0.24)  | 0.16(0.18)  | 0.06(0.24)  | 0.04(0.30)  | -0.06(0.34) | -0.11(0.30) | 8.82E-01 | 8.57E-01 | 7.23E-01 | 9.98E-01 | 9.94E-01 | 9.29E-01 |
| Levogluconan              | 0.24(0.35)  | 0.02(0.20)  | 0.17(0.16)  | -0.22(0.40) | -0.07(0.39) | 0.15(0.26)  | 5.91E-01 | 8.61E-01 | 5.63E-01 | 9.98E-01 | 9.94E-01 | 9.04E-01 |
| Urea                      | 0.29(0.26)  | 0.05(0.16)  | 0.23(0.23)  | -0.24(0.31) | -0.06(0.35) | 0.18(0.28)  | 4.44E-01 | 8.68E-01 | 5.22E-01 | 9.98E-01 | 9.94E-01 | 8.92E-01 |
| Ribonic acid              | 0.02(0.50)  | 0.17(0.20)  | -0.07(0.21) | 0.15(0.54)  | -0.09(0.54) | -0.24(0.29) | 7.78E-01 | 8.69E-01 | 4.09E-01 | 9.98E-01 | 9.94E-01 | 8.25E-01 |
| Lyxitol                   | 0.07(0.21)  | -0.05(0.24) | 0.11(0.19)  | -0.12(0.32) | 0.04(0.28)  | 0.16(0.31)  | 7.04E-01 | 8.88E-01 | 6.07E-01 | 9.98E-01 | 9.94E-01 | 9.16E-01 |
| Nicotinic acid            | 0.06(0.18)  | 0.12(0.21)  | 0.11(0.34)  | 0.05(0.26)  | 0.04(0.38)  | -0.01(0.39) | 8.47E-01 | 9.12E-01 | 9.81E-01 | 9.98E-01 | 9.94E-01 | 9.95E-01 |
| 3-(1-pyrazolyl)-L-alanine | 0.13(0.40)  | 0.11(0.72)  | 0.09(0.13)  | -0.01(0.81) | -0.04(0.41) | -0.02(0.73) | 9.85E-01 | 9.28E-01 | 9.75E-01 | 9.98E-01 | 9.94E-01 | 9.95E-01 |
| Fumaric acid              | 0.08(0.19)  | 0.18(0.21)  | 0.06(0.27)  | 0.09(0.28)  | -0.03(0.32) | -0.12(0.33) | 7.33E-01 | 9.38E-01 | 7.22E-01 | 9.98E-01 | 9.94E-01 | 9.29E-01 |
| Heptadecanoic acid        | 0.07(0.20)  | -0.04(0.25) | 0.09(0.19)  | -0.11(0.33) | 0.02(0.28)  | 0.13(0.32)  | 7.40E-01 | 9.40E-01 | 6.86E-01 | 9.98E-01 | 9.94E-01 | 9.29E-01 |
| Uric acid                 | -0.07(0.23) | 0.18(0.27)  | -0.05(0.20) | 0.25(0.35)  | 0.02(0.31)  | -0.23(0.33) | 4.80E-01 | 9.53E-01 | 4.89E-01 | 9.98E-01 | 9.94E-01 | 8.70E-01 |
| Taurine                   | -0.02(0.27) | 0.19(0.20)  | -0.04(0.19) | 0.21(0.33)  | -0.01(0.33) | -0.22(0.27) | 5.32E-01 | 9.69E-01 | 4.21E-01 | 9.98E-01 | 9.94E-01 | 8.40E-01 |
| Aminomalonate             | 0.11(0.18)  | 0.27(0.25)  | 0.12(0.21)  | 0.16(0.30)  | 0.01(0.28)  | -0.15(0.32) | 5.93E-01 | 9.79E-01 | 6.33E-01 | 9.98E-01 | 9.94E-01 | 9.17E-01 |
| Glycerol                  | 0.11(0.20)  | 0.17(0.20)  | 0.11(0.26)  | 0.06(0.27)  | -0.01(0.31) | -0.07(0.31) | 8.23E-01 | 9.86E-01 | 8.30E-01 | 9.98E-01 | 9.94E-01 | 9.46E-01 |
| Stearic acid              | 0.13(0.21)  | -0.02(0.25) | 0.14(0.20)  | -0.15(0.33) | 0.00(0.28)  | 0.16(0.32)  | 6.37E-01 | 9.88E-01 | 6.21E-01 | 9.98E-01 | 9.94E-01 | 9.16E-01 |
| Hexuronic acid            | 0.00(0.43)  | 0.25(0.31)  | -0.01(0.16) | 0.26(0.53)  | -0.01(0.45) | -0.26(0.35) | 6.32E-01 | 9.89E-01 | 4.54E-01 | 9.98E-01 | 9.94E-01 | 8.50E-01 |
| Isothreitol               | 0.16(0.32)  | 0.39(0.29)  | 0.17(0.14)  | 0.23(0.43)  | 0.00(0.34)  | -0.22(0.32) | 6.01E-01 | 9.94E-01 | 4.86E-01 | 9.98E-01 | 9.94E-01 | 8.70E-01 |

| Unknown |             |             |             |             |             |             |          |          |          |          |          |          |
|---------|-------------|-------------|-------------|-------------|-------------|-------------|----------|----------|----------|----------|----------|----------|
| 135869  | 0.02(0.15)  | -0.25(0.34) | -1.05(0.14) | -0.27(0.37) | -1.07(0.21) | -0.80(0.37) | 4.64E-01 | 3.82E-06 | 3.71E-02 | 9.98E-01 | 1.44E-03 | 2.06E-01 |
| 41689   | 0.02(0.14)  | 0.04(0.33)  | -1.15(0.20) | 0.02(0.36)  | -1.17(0.25) | -1.19(0.39) | 9.53E-01 | 1.13E-05 | 3.36E-03 | 9.98E-01 | 2.12E-03 | 5.00E-02 |
| 6646    | -0.01(0.16) | -0.37(0.36) | -0.95(0.13) | -0.36(0.39) | -0.94(0.21) | -0.58(0.39) | 3.66E-01 | 2.38E-05 | 1.42E-01 | 9.98E-01 | 3.00E-03 | 5.11E-01 |
| 6066    | 0.04(0.18)  | -0.10(0.16) | 1.02(0.15)  | -0.14(0.24) | 0.98(0.23)  | 1.12(0.22)  | 5.66E-01 | 8.46E-05 | 2.39E-06 | 9.98E-01 | 6.36E-03 | 3.00E-04 |
| 87756   | 0.05(0.14)  | 0.01(0.21)  | 1.41(0.30)  | -0.04(0.24) | 1.36(0.33)  | 1.41(0.36)  | 8.59E-01 | 1.05E-04 | 2.33E-04 | 9.98E-01 | 6.36E-03 | 9.78E-03 |
| 88583   | -0.06(0.16) | -0.12(0.19) | 0.88(0.18)  | -0.06(0.25) | 0.94(0.24)  | 1.00(0.26)  | 8.16E-01 | 2.06E-04 | 2.71E-04 | 9.98E-01 | 8.63E-03 | 1.02E-02 |
| 64546   | -0.01(0.17) | -0.06(0.30) | -0.83(0.14) | -0.04(0.35) | -0.82(0.22) | -0.78(0.33) | 8.98E-01 | 3.69E-04 | 2.15E-02 | 9.98E-01 | 1.29E-02 | 1.40E-01 |
| 16550   | 0.09(0.15)  | 0.10(0.19)  | 1.38(0.34)  | 0.01(0.24)  | 1.29(0.37)  | 1.28(0.39)  | 9.59E-01 | 9.38E-04 | 1.68E-03 | 9.98E-01 | 2.36E-02 | 3.73E-02 |
| 127277  | -0.01(0.16) | -0.33(0.18) | 4.43(1.29)  | -0.32(0.24) | 4.43(1.29)  | 4.75(1.30)  | 1.92E-01 | 1.03E-03 | 5.08E-04 | 9.98E-01 | 2.43E-02 | 1.47E-02 |
| 41683   | -0.04(0.17) | -0.04(0.40) | -0.82(0.15) | -0.01(0.44) | -0.78(0.23) | -0.78(0.43) | 9.89E-01 | 1.24E-03 | 7.72E-02 | 9.98E-01 | 2.74E-02 | 3.27E-01 |
| 132379  | 0.08(0.19)  | 0.21(0.19)  | 0.96(0.19)  | 0.13(0.27)  | 0.88(0.27)  | 0.75(0.27)  | 6.13E-01 | 1.55E-03 | 7.36E-03 | 9.98E-01 | 2.92E-02 | 9.17E-02 |
| 135260  | 0.16(0.16)  | 0.31(0.20)  | 0.90(0.16)  | 0.15(0.25)  | 0.74(0.23)  | 0.59(0.26)  | 5.61E-01 | 1.79E-03 | 2.52E-02 | 9.98E-01 | 3.22E-02 | 1.56E-01 |
| 62      | 0.04(0.19)  | 0.02(0.20)  | 0.81(0.15)  | -0.02(0.27) | 0.77(0.24)  | 0.79(0.25)  | 9.44E-01 | 2.30E-03 | 2.18E-03 | 9.98E-01 | 3.94E-02 | 4.09E-02 |
| 131620  | 0.02(0.18)  | -0.01(0.17) | 0.89(0.21)  | -0.02(0.25) | 0.87(0.28)  | 0.89(0.27)  | 9.29E-01 | 2.58E-03 | 1.64E-03 | 9.98E-01 | 4.15E-02 | 3.73E-02 |
| 112487  | 0.09(0.17)  | 0.16(0.23)  | 0.83(0.16)  | 0.07(0.28)  | 0.74(0.24)  | 0.67(0.28)  | 8.00E-01 | 2.70E-03 | 1.83E-02 | 9.98E-01 | 4.15E-02 | 1.30E-01 |
| 135610  | 0.03(0.19)  | -0.01(0.27) | -0.73(0.15) | -0.04(0.34) | -0.76(0.24) | -0.72(0.32) | 9.13E-01 | 2.75E-03 | 2.59E-02 | 9.98E-01 | 4.15E-02 | 1.58E-01 |
| 95550   | 0.02(0.17)  | 0.25(0.24)  | 0.75(0.17)  | 0.23(0.30)  | 0.72(0.24)  | 0.49(0.30)  | 4.45E-01 | 3.33E-03 | 1.05E-01 | 9.98E-01 | 4.65E-02 | 4.23E-01 |
| 7718    | 0.01(0.13)  | -0.03(0.31) | 1.52(0.50)  | -0.03(0.33) | 1.51(0.51)  | 1.54(0.58)  | 9.22E-01 | 4.34E-03 | 1.01E-02 | 9.98E-01 | 5.55E-02 | 9.87E-02 |
| 2001    | -0.08(0.23) | -0.15(0.17) | 0.77(0.18)  | -0.07(0.28) | 0.85(0.29)  | 0.91(0.25)  | 8.14E-01 | 4.56E-03 | 4.50E-04 | 9.98E-01 | 5.55E-02 | 1.41E-02 |
| 6115    | 0.06(0.17)  | 0.03(0.20)  | -0.90(0.29) | -0.03(0.26) | -0.96(0.33) | -0.93(0.35) | 9.05E-01 | 5.26E-03 | 9.29E-03 | 9.98E-01 | 6.19E-02 | 9.73E-02 |
| 1709    | 0.02(0.17)  | 0.03(0.22)  | 0.74(0.19)  | 0.01(0.28)  | 0.72(0.25)  | 0.71(0.29)  | 9.58E-01 | 5.65E-03 | 1.82E-02 | 9.98E-01 | 6.28E-02 | 1.30E-01 |
| 5990    | 0.02(0.18)  | 0.16(0.16)  | 1.11(0.34)  | 0.13(0.24)  | 1.09(0.39)  | 0.95(0.38)  | 5.80E-01 | 6.69E-03 | 1.47E-02 | 9.98E-01 | 7.21E-02 | 1.22E-01 |
| 16792   | -0.01(0.16) | -0.36(0.23) | -0.81(0.24) | -0.36(0.28) | -0.81(0.29) | -0.45(0.33) | 2.09E-01 | 7.32E-03 | 1.77E-01 | 9.98E-01 | 7.67E-02 | 6.02E-01 |
| 159824  | 0.05(0.20)  | 0.13(0.18)  | 0.79(0.18)  | 0.08(0.27)  | 0.73(0.27)  | 0.65(0.25)  | 7.69E-01 | 8.50E-03 | 1.19E-02 | 9.98E-01 | 8.44E-02 | 1.07E-01 |
| 62433   | 0.11(0.18)  | 0.24(0.19)  | 0.80(0.18)  | 0.13(0.26)  | 0.68(0.26)  | 0.55(0.26)  | 6.20E-01 | 9.43E-03 | 3.76E-02 | 9.98E-01 | 8.89E-02 | 2.06E-01 |
| 146957  | 0.03(0.19)  | 0.05(0.17)  | 0.79(0.21)  | 0.02(0.26)  | 0.76(0.29)  | 0.74(0.27)  | 9.26E-01 | 9.77E-03 | 7.87E-03 | 9.98E-01 | 8.98E-02 | 9.17E-02 |
| 6802    | 0.07(0.22)  | 0.08(0.16)  | -1.06(0.40) | -0.00(0.26) | -1.13(0.45) | -1.13(0.43) | 9.92E-01 | 1.38E-02 | 1.02E-02 | 9.98E-01 | 1.16E-01 | 9.87E-02 |
| 132976  | -0.16(0.20) | -0.16(0.22) | 0.51(0.17)  | -0.01(0.30) | 0.67(0.26)  | 0.67(0.28)  | 9.80E-01 | 1.45E-02 | 1.86E-02 | 9.98E-01 | 1.19E-01 | 1.30E-01 |



|        |             |             |             |             |             |             |          |          |          |          |          |          |
|--------|-------------|-------------|-------------|-------------|-------------|-------------|----------|----------|----------|----------|----------|----------|
| 21513  | 0.10(0.19)  | 0.10(0.19)  | -0.87(0.35) | -0.00(0.25) | -0.97(0.39) | -0.97(0.40) | 9.86E-01 | 1.50E-02 | 1.82E-02 | 9.98E-01 | 1.20E-01 | 1.30E-01 |
| 47     | 0.23(0.19)  | 0.15(0.20)  | 0.83(0.16)  | -0.09(0.26) | 0.59(0.24)  | 0.68(0.25)  | 7.43E-01 | 1.62E-02 | 8.79E-03 | 9.98E-01 | 1.27E-01 | 9.47E-02 |
| 21666  | -0.03(0.21) | -0.12(0.19) | 0.62(0.18)  | -0.09(0.28) | 0.65(0.28)  | 0.74(0.26)  | 7.53E-01 | 2.14E-02 | 5.73E-03 | 9.98E-01 | 1.52E-01 | 7.72E-02 |
| 2039   | -0.04(0.18) | -0.09(0.21) | 0.65(0.23)  | -0.06(0.28) | 0.69(0.30)  | 0.75(0.30)  | 8.32E-01 | 2.31E-02 | 1.45E-02 | 9.98E-01 | 1.61E-01 | 1.22E-01 |
| 20903  | 0.10(0.35)  | 0.01(0.13)  | 1.03(0.22)  | -0.09(0.38) | 0.94(0.41)  | 1.03(0.26)  | 8.12E-01 | 2.43E-02 | 1.84E-04 | 9.98E-01 | 1.67E-01 | 8.67E-03 |
| 2061   | 0.07(0.21)  | 0.10(0.19)  | 0.70(0.17)  | 0.03(0.28)  | 0.62(0.28)  | 0.60(0.26)  | 9.24E-01 | 2.67E-02 | 2.35E-02 | 9.98E-01 | 1.77E-01 | 1.49E-01 |
| 443    | 0.13(0.21)  | -0.01(0.17) | 0.76(0.19)  | -0.13(0.27) | 0.63(0.28)  | 0.77(0.25)  | 6.22E-01 | 2.75E-02 | 3.45E-03 | 9.98E-01 | 1.77E-01 | 5.00E-02 |
| 109423 | -0.10(0.15) | -0.89(1.40) | 0.48(0.23)  | -0.80(1.40) | 0.58(0.27)  | 1.37(1.40)  | 5.73E-01 | 3.53E-02 | 3.31E-01 | 9.98E-01 | 2.15E-01 | 7.48E-01 |
| 1981   | 0.11(0.13)  | 0.43(0.46)  | 0.69(0.23)  | 0.32(0.47)  | 0.57(0.27)  | 0.25(0.51)  | 5.04E-01 | 3.67E-02 | 6.22E-01 | 9.98E-01 | 2.19E-01 | 9.16E-01 |
| 1912   | 0.06(0.18)  | -0.14(0.20) | 0.64(0.22)  | -0.20(0.28) | 0.58(0.28)  | 0.78(0.30)  | 4.68E-01 | 4.02E-02 | 1.11E-02 | 9.98E-01 | 2.33E-01 | 1.02E-01 |
| 1941   | 0.01(0.20)  | 0.02(0.19)  | 0.60(0.21)  | 0.01(0.27)  | 0.60(0.29)  | 0.59(0.29)  | 9.66E-01 | 4.22E-02 | 4.53E-02 | 9.98E-01 | 2.41E-01 | 2.37E-01 |
| 1029   | 0.22(0.24)  | 0.08(0.17)  | 0.81(0.16)  | -0.14(0.29) | 0.59(0.29)  | 0.73(0.23)  | 6.29E-01 | 4.60E-02 | 2.28E-03 | 9.98E-01 | 2.59E-01 | 4.09E-02 |
| 109387 | 0.06(0.19)  | 0.08(0.25)  | -0.48(0.20) | 0.02(0.30)  | -0.53(0.27) | -0.55(0.32) | 9.51E-01 | 5.09E-02 | 8.54E-02 | 9.98E-01 | 2.78E-01 | 3.58E-01 |
| 5930   | 0.14(0.16)  | 0.24(0.24)  | 0.95(0.38)  | 0.09(0.29)  | 0.80(0.41)  | 0.71(0.46)  | 7.46E-01 | 5.72E-02 | 1.26E-01 | 9.98E-01 | 2.96E-01 | 4.71E-01 |
| 257    | -0.10(0.23) | -0.04(0.18) | 0.50(0.21)  | 0.06(0.28)  | 0.60(0.31)  | 0.54(0.27)  | 8.42E-01 | 5.79E-02 | 5.23E-02 | 9.98E-01 | 2.96E-01 | 2.50E-01 |
| 3465   | 0.06(0.17)  | -0.15(0.24) | -0.51(0.24) | -0.21(0.29) | -0.57(0.30) | -0.36(0.34) | 4.76E-01 | 6.07E-02 | 2.86E-01 | 9.98E-01 | 3.00E-01 | 7.20E-01 |
| 14509  | 0.11(0.17)  | 0.07(0.20)  | 0.83(0.37)  | -0.04(0.26) | 0.72(0.41)  | 0.76(0.42)  | 8.77E-01 | 8.19E-02 | 7.53E-02 | 9.98E-01 | 3.80E-01 | 3.26E-01 |
| 132414 | 0.08(0.23)  | 0.04(0.15)  | -0.63(0.35) | -0.04(0.27) | -0.71(0.40) | -0.67(0.37) | 8.72E-01 | 8.24E-02 | 7.68E-02 | 9.98E-01 | 3.80E-01 | 3.27E-01 |
| 1725   | 0.07(0.17)  | 0.00(0.24)  | 0.55(0.22)  | -0.07(0.29) | 0.47(0.27)  | 0.55(0.32)  | 7.99E-01 | 8.81E-02 | 8.86E-02 | 9.98E-01 | 3.95E-01 | 3.67E-01 |
| 4956   | 0.16(0.22)  | 0.07(0.17)  | -0.49(0.31) | -0.10(0.28) | -0.66(0.38) | -0.56(0.35) | 7.31E-01 | 9.30E-02 | 1.18E-01 | 9.98E-01 | 4.12E-01 | 4.59E-01 |
| 469    | 0.17(0.20)  | -0.08(0.19) | 0.64(0.19)  | -0.25(0.27) | 0.47(0.28)  | 0.72(0.26)  | 3.54E-01 | 9.61E-02 | 8.39E-03 | 9.98E-01 | 4.13E-01 | 9.31E-02 |
| 134336 | 0.16(0.17)  | 0.36(0.26)  | 0.60(0.21)  | 0.20(0.30)  | 0.43(0.26)  | 0.23(0.32)  | 5.05E-01 | 9.62E-02 | 4.68E-01 | 9.98E-01 | 4.13E-01 | 8.52E-01 |
| 117141 | 0.09(0.21)  | 0.00(0.21)  | 0.56(0.18)  | -0.09(0.30) | 0.47(0.28)  | 0.56(0.27)  | 7.50E-01 | 9.64E-02 | 4.17E-02 | 9.98E-01 | 4.13E-01 | 2.24E-01 |
| 103102 | 0.21(0.20)  | 0.29(0.21)  | 0.62(0.17)  | 0.09(0.28)  | 0.41(0.26)  | 0.32(0.26)  | 7.53E-01 | 1.14E-01 | 2.17E-01 | 9.98E-01 | 4.82E-01 | 6.33E-01 |
| 5346   | 0.15(0.17)  | 0.31(0.24)  | 0.55(0.19)  | 0.17(0.30)  | 0.41(0.26)  | 0.24(0.30)  | 5.74E-01 | 1.23E-01 | 4.34E-01 | 9.98E-01 | 4.98E-01 | 8.47E-01 |
| 4942   | 0.06(0.23)  | 0.02(0.16)  | -0.54(0.33) | -0.04(0.27) | -0.60(0.39) | -0.56(0.36) | 8.85E-01 | 1.29E-01 | 1.25E-01 | 9.98E-01 | 5.14E-01 | 4.71E-01 |
| 17068  | 0.12(0.19)  | -0.03(0.20) | 0.54(0.22)  | -0.15(0.28) | 0.42(0.28)  | 0.57(0.30)  | 5.93E-01 | 1.33E-01 | 5.74E-02 | 9.98E-01 | 5.23E-01 | 2.67E-01 |
| 160313 | 0.72(0.93)  | 0.15(0.20)  | -0.69(0.25) | -0.57(0.94) | -1.41(0.97) | -0.84(0.32) | 5.48E-01 | 1.48E-01 | 1.05E-02 | 9.98E-01 | 5.56E-01 | 9.87E-02 |
| 4948   | -0.02(0.26) | 0.03(0.15)  | -0.59(0.30) | 0.06(0.29)  | -0.57(0.39) | -0.63(0.33) | 8.50E-01 | 1.49E-01 | 6.09E-02 | 9.98E-01 | 5.56E-01 | 2.80E-01 |

|        |             |             |             |             |             |             |          |          |          |          |          |          |
|--------|-------------|-------------|-------------|-------------|-------------|-------------|----------|----------|----------|----------|----------|----------|
| 6526   | 0.18(0.33)  | 0.02(0.14)  | -0.48(0.35) | -0.16(0.35) | -0.66(0.46) | -0.51(0.38) | 6.58E-01 | 1.54E-01 | 1.81E-01 | 9.98E-01 | 5.71E-01 | 6.02E-01 |
| 8607   | -0.14(0.24) | 0.06(0.28)  | -0.53(0.14) | 0.20(0.37)  | -0.39(0.28) | -0.59(0.32) | 5.97E-01 | 1.57E-01 | 7.15E-02 | 9.98E-01 | 5.73E-01 | 3.13E-01 |
| 7053   | -0.01(0.20) | -0.15(0.25) | 0.39(0.23)  | -0.14(0.31) | 0.40(0.30)  | 0.55(0.34)  | 6.43E-01 | 1.90E-01 | 1.09E-01 | 9.98E-01 | 6.65E-01 | 4.34E-01 |
| 4577   | 0.14(0.22)  | 0.07(0.19)  | 0.53(0.21)  | -0.06(0.29) | 0.40(0.30)  | 0.46(0.29)  | 8.28E-01 | 1.92E-01 | 1.15E-01 | 9.98E-01 | 6.65E-01 | 4.53E-01 |
| 4981   | 0.19(0.37)  | 0.03(0.14)  | -0.47(0.37) | -0.17(0.39) | -0.67(0.51) | -0.50(0.40) | 6.65E-01 | 1.96E-01 | 2.13E-01 | 9.98E-01 | 6.65E-01 | 6.33E-01 |
| 5483   | 0.04(0.19)  | 0.05(0.18)  | -0.46(0.33) | 0.01(0.26)  | -0.49(0.38) | -0.51(0.37) | 9.58E-01 | 1.96E-01 | 1.82E-01 | 9.98E-01 | 6.65E-01 | 6.02E-01 |
| 134    | 0.07(0.16)  | -0.14(0.25) | -0.35(0.29) | -0.20(0.30) | -0.42(0.33) | -0.22(0.37) | 4.94E-01 | 2.06E-01 | 5.65E-01 | 9.98E-01 | 6.78E-01 | 9.04E-01 |
| 4927   | 0.06(0.17)  | 0.03(0.24)  | -2.61(2.10) | -0.03(0.30) | -2.67(2.10) | -2.65(2.10) | 9.28E-01 | 2.07E-01 | 2.12E-01 | 9.98E-01 | 6.78E-01 | 6.33E-01 |
| 9320   | 0.03(0.19)  | 0.14(0.28)  | 0.36(0.18)  | 0.11(0.34)  | 0.33(0.26)  | 0.23(0.33)  | 7.58E-01 | 2.10E-01 | 4.98E-01 | 9.98E-01 | 6.78E-01 | 8.74E-01 |
| 8270   | -0.13(0.19) | -0.25(0.30) | -0.45(0.18) | -0.13(0.35) | -0.32(0.26) | -0.20(0.35) | 7.23E-01 | 2.21E-01 | 5.66E-01 | 9.98E-01 | 7.05E-01 | 9.04E-01 |
| 4863   | -0.01(0.18) | 0.10(0.30)  | 0.29(0.18)  | 0.11(0.35)  | 0.30(0.26)  | 0.19(0.36)  | 7.59E-01 | 2.48E-01 | 5.94E-01 | 9.98E-01 | 7.60E-01 | 9.07E-01 |
| 6580   | 0.02(0.20)  | 0.08(0.18)  | -0.40(0.33) | 0.06(0.26)  | -0.42(0.37) | -0.48(0.37) | 8.32E-01 | 2.63E-01 | 2.06E-01 | 9.98E-01 | 8.00E-01 | 6.33E-01 |
| 4941   | 0.07(0.22)  | 0.05(0.18)  | -0.39(0.37) | -0.02(0.28) | -0.46(0.42) | -0.44(0.41) | 9.40E-01 | 2.77E-01 | 2.85E-01 | 9.98E-01 | 8.00E-01 | 7.20E-01 |
| 3329   | 0.09(0.18)  | 0.07(0.20)  | -0.46(0.48) | -0.02(0.26) | -0.54(0.50) | -0.52(0.52) | 9.30E-01 | 2.78E-01 | 3.18E-01 | 9.98E-01 | 8.00E-01 | 7.41E-01 |
| 18488  | 0.11(0.24)  | 0.11(0.17)  | -0.26(0.25) | 0.01(0.29)  | -0.37(0.34) | -0.37(0.30) | 9.78E-01 | 2.84E-01 | 2.17E-01 | 9.98E-01 | 8.08E-01 | 6.33E-01 |
| 4925   | 0.05(0.22)  | 0.08(0.18)  | -0.34(0.29) | 0.04(0.27)  | -0.39(0.36) | -0.42(0.34) | 8.93E-01 | 2.85E-01 | 2.11E-01 | 9.98E-01 | 8.08E-01 | 6.33E-01 |
| 4971   | 0.06(0.21)  | 0.04(0.19)  | -0.27(0.25) | -0.02(0.28) | -0.33(0.32) | -0.32(0.31) | 9.53E-01 | 2.97E-01 | 3.20E-01 | 9.98E-01 | 8.33E-01 | 7.41E-01 |
| 41708  | 0.11(0.29)  | 0.08(0.16)  | -0.30(0.28) | -0.03(0.32) | -0.41(0.39) | -0.38(0.32) | 9.24E-01 | 2.99E-01 | 2.43E-01 | 9.98E-01 | 8.33E-01 | 6.68E-01 |
| 4937   | 0.15(0.19)  | 0.08(0.19)  | 0.56(0.37)  | -0.07(0.27) | 0.41(0.40)  | 0.48(0.41)  | 7.99E-01 | 3.04E-01 | 2.48E-01 | 9.98E-01 | 8.35E-01 | 6.72E-01 |
| 4938   | 0.07(0.25)  | 0.04(0.17)  | -0.42(0.43) | -0.04(0.29) | -0.49(0.48) | -0.46(0.46) | 9.05E-01 | 3.06E-01 | 3.22E-01 | 9.98E-01 | 8.36E-01 | 7.41E-01 |
| 54     | 0.06(0.20)  | 0.16(0.18)  | -0.31(0.30) | 0.10(0.27)  | -0.37(0.36) | -0.47(0.35) | 7.06E-01 | 3.09E-01 | 1.82E-01 | 9.98E-01 | 8.39E-01 | 6.02E-01 |
| 3258   | 0.02(0.16)  | 0.02(0.27)  | 0.40(0.35)  | 0.01(0.30)  | 0.38(0.38)  | 0.37(0.43)  | 9.80E-01 | 3.19E-01 | 3.86E-01 | 9.98E-01 | 8.52E-01 | 8.10E-01 |
| 573    | 0.03(0.17)  | 0.44(0.34)  | 0.30(0.22)  | 0.40(0.38)  | 0.27(0.27)  | -0.14(0.40) | 2.91E-01 | 3.27E-01 | 7.31E-01 | 9.98E-01 | 8.67E-01 | 9.29E-01 |
| 4943   | 0.07(0.22)  | 0.03(0.17)  | -0.31(0.33) | -0.04(0.27) | -0.38(0.39) | -0.34(0.36) | 8.95E-01 | 3.36E-01 | 3.49E-01 | 9.98E-01 | 8.75E-01 | 7.70E-01 |
| 47170  | 0.12(0.22)  | 0.16(0.20)  | 0.40(0.20)  | 0.05(0.29)  | 0.28(0.29)  | 0.23(0.28)  | 8.77E-01 | 3.47E-01 | 4.13E-01 | 9.98E-01 | 8.75E-01 | 8.28E-01 |
| 6579   | 0.10(0.16)  | 0.07(0.21)  | -0.43(0.56) | -0.03(0.26) | -0.53(0.57) | -0.50(0.59) | 9.13E-01 | 3.55E-01 | 3.96E-01 | 9.98E-01 | 8.75E-01 | 8.18E-01 |
| 17651  | 0.05(0.19)  | 0.21(0.23)  | -0.22(0.25) | 0.16(0.31)  | -0.28(0.30) | -0.43(0.34) | 6.13E-01 | 3.57E-01 | 2.12E-01 | 9.98E-01 | 8.75E-01 | 6.33E-01 |
| 100253 | 0.12(0.30)  | 0.04(0.16)  | 0.47(0.22)  | -0.09(0.34) | 0.34(0.37)  | 0.43(0.28)  | 8.02E-01 | 3.58E-01 | 1.25E-01 | 9.98E-01 | 8.75E-01 | 4.71E-01 |
| 64551  | 0.15(0.25)  | 0.16(0.19)  | -0.15(0.20) | 0.01(0.31)  | -0.30(0.32) | -0.31(0.28) | 9.69E-01 | 3.59E-01 | 2.75E-01 | 9.98E-01 | 8.75E-01 | 7.11E-01 |

|        |             |             |             |             |             |             |          |          |          |          |          |          |
|--------|-------------|-------------|-------------|-------------|-------------|-------------|----------|----------|----------|----------|----------|----------|
| 153    | 0.07(0.20)  | 0.08(0.24)  | 0.33(0.20)  | 0.01(0.31)  | 0.26(0.28)  | 0.25(0.32)  | 9.77E-01 | 3.60E-01 | 4.33E-01 | 9.98E-01 | 8.75E-01 | 8.47E-01 |
| 892    | -0.11(0.25) | 0.07(0.15)  | -0.53(0.38) | 0.18(0.29)  | -0.41(0.45) | -0.59(0.41) | 5.36E-01 | 3.62E-01 | 1.53E-01 | 9.98E-01 | 8.75E-01 | 5.30E-01 |
| 87710  | -0.09(0.17) | 0.09(0.28)  | -0.36(0.23) | 0.18(0.34)  | -0.27(0.29) | -0.45(0.37) | 5.90E-01 | 3.63E-01 | 2.32E-01 | 9.98E-01 | 8.75E-01 | 6.54E-01 |
| 1875   | 0.18(0.20)  | 0.33(0.18)  | 0.47(0.27)  | 0.16(0.26)  | 0.29(0.32)  | 0.14(0.31)  | 5.49E-01 | 3.68E-01 | 6.61E-01 | 9.98E-01 | 8.79E-01 | 9.22E-01 |
| 4871   | 0.07(0.16)  | -0.16(0.42) | -0.15(0.21) | -0.23(0.44) | -0.23(0.26) | 0.01(0.46)  | 6.00E-01 | 3.85E-01 | 9.88E-01 | 9.98E-01 | 9.08E-01 | 9.97E-01 |
| 4887   | 0.04(0.24)  | 0.32(0.23)  | 0.30(0.20)  | 0.28(0.32)  | 0.26(0.31)  | -0.02(0.30) | 3.93E-01 | 4.02E-01 | 9.49E-01 | 9.98E-01 | 9.26E-01 | 9.94E-01 |
| 41697  | 0.14(0.23)  | 0.07(0.17)  | -0.19(0.33) | -0.07(0.28) | -0.33(0.39) | -0.25(0.36) | 7.97E-01 | 4.03E-01 | 4.87E-01 | 9.98E-01 | 9.26E-01 | 8.70E-01 |
| 91421  | 0.04(0.20)  | 0.23(0.24)  | -0.23(0.25) | 0.19(0.31)  | -0.26(0.32) | -0.46(0.33) | 5.36E-01 | 4.09E-01 | 1.76E-01 | 9.98E-01 | 9.31E-01 | 6.02E-01 |
| 1878   | 0.19(0.18)  | 0.30(0.21)  | 0.43(0.25)  | 0.12(0.27)  | 0.24(0.29)  | 0.12(0.32)  | 6.58E-01 | 4.15E-01 | 7.01E-01 | 9.98E-01 | 9.31E-01 | 9.29E-01 |
| 31357  | 0.08(0.16)  | 0.22(0.28)  | -0.15(0.23) | 0.14(0.32)  | -0.22(0.28) | -0.37(0.37) | 6.61E-01 | 4.20E-01 | 3.20E-01 | 9.98E-01 | 9.31E-01 | 7.41E-01 |
| 5288   | 0.11(0.23)  | 0.06(0.16)  | 0.41(0.32)  | -0.05(0.27) | 0.30(0.38)  | 0.34(0.35)  | 8.66E-01 | 4.30E-01 | 3.31E-01 | 9.98E-01 | 9.31E-01 | 7.48E-01 |
| 117171 | 0.04(0.19)  | 0.07(0.26)  | 0.26(0.21)  | 0.03(0.32)  | 0.22(0.28)  | 0.19(0.33)  | 9.22E-01 | 4.32E-01 | 5.77E-01 | 9.98E-01 | 9.31E-01 | 9.04E-01 |
| 4945   | 0.03(0.22)  | 0.05(0.18)  | 0.28(0.26)  | 0.01(0.28)  | 0.25(0.32)  | 0.24(0.31)  | 9.67E-01 | 4.42E-01 | 4.50E-01 | 9.98E-01 | 9.31E-01 | 8.50E-01 |
| 46292  | 0.26(0.25)  | 0.18(0.17)  | 0.52(0.26)  | -0.08(0.30) | 0.26(0.35)  | 0.34(0.31)  | 7.90E-01 | 4.62E-01 | 2.76E-01 | 9.98E-01 | 9.31E-01 | 7.11E-01 |
| 41682  | 0.07(0.19)  | 0.04(0.30)  | -0.13(0.19) | -0.03(0.36) | -0.20(0.27) | -0.17(0.35) | 9.36E-01 | 4.70E-01 | 6.36E-01 | 9.98E-01 | 9.31E-01 | 9.17E-01 |
| 139467 | 0.24(0.27)  | 0.05(0.16)  | -0.03(0.30) | -0.19(0.30) | -0.26(0.38) | -0.08(0.33) | 5.32E-01 | 4.84E-01 | 8.21E-01 | 9.98E-01 | 9.31E-01 | 9.46E-01 |
| 4922   | 0.22(0.60)  | 0.16(0.19)  | -0.22(0.22) | -0.07(0.62) | -0.44(0.63) | -0.37(0.30) | 9.17E-01 | 4.87E-01 | 2.12E-01 | 9.98E-01 | 9.31E-01 | 6.33E-01 |
| 119167 | -0.05(0.28) | 0.00(0.27)  | -0.27(0.15) | 0.05(0.40)  | -0.22(0.32) | -0.27(0.31) | 8.94E-01 | 4.96E-01 | 3.83E-01 | 9.98E-01 | 9.31E-01 | 8.10E-01 |
| 5482   | 0.17(0.26)  | 0.07(0.16)  | -0.12(0.36) | -0.10(0.29) | -0.29(0.43) | -0.20(0.39) | 7.39E-01 | 4.96E-01 | 6.19E-01 | 9.98E-01 | 9.31E-01 | 9.16E-01 |
| 160543 | 0.17(0.36)  | 0.14(0.24)  | 0.43(0.17)  | -0.03(0.41) | 0.26(0.39)  | 0.29(0.29)  | 9.41E-01 | 5.04E-01 | 3.12E-01 | 9.98E-01 | 9.31E-01 | 7.41E-01 |
| 6864   | 0.11(0.24)  | 0.07(0.17)  | -0.15(0.34) | -0.04(0.28) | -0.26(0.39) | -0.22(0.37) | 8.74E-01 | 5.05E-01 | 5.56E-01 | 9.98E-01 | 9.31E-01 | 9.04E-01 |
| 7403   | -0.08(1.79) | 0.11(0.18)  | 1.14(0.27)  | 0.19(1.80)  | 1.21(1.81)  | 1.03(0.32)  | 9.18E-01 | 5.06E-01 | 2.17E-03 | 9.98E-01 | 9.31E-01 | 4.09E-02 |
| 2936   | 0.19(0.25)  | 0.10(0.25)  | 0.39(0.16)  | -0.09(0.35) | 0.19(0.30)  | 0.29(0.30)  | 7.96E-01 | 5.20E-01 | 3.39E-01 | 9.98E-01 | 9.31E-01 | 7.58E-01 |
| 160    | 0.02(0.32)  | -0.08(0.22) | 0.26(0.21)  | -0.10(0.38) | 0.24(0.37)  | 0.34(0.30)  | 7.82E-01 | 5.23E-01 | 2.57E-01 | 9.98E-01 | 9.31E-01 | 6.82E-01 |
| 4932   | 0.12(0.23)  | -0.18(0.20) | -0.08(0.20) | -0.30(0.30) | -0.20(0.31) | 0.10(0.28)  | 3.28E-01 | 5.28E-01 | 7.14E-01 | 9.98E-01 | 9.31E-01 | 9.29E-01 |
| 473    | 0.15(0.23)  | 0.05(0.16)  | -0.10(0.34) | -0.10(0.27) | -0.25(0.40) | -0.15(0.37) | 7.11E-01 | 5.32E-01 | 6.93E-01 | 9.98E-01 | 9.31E-01 | 9.29E-01 |
| 160463 | -0.07(0.23) | -0.05(0.19) | 0.12(0.21)  | 0.03(0.29)  | 0.19(0.31)  | 0.17(0.28)  | 9.26E-01 | 5.34E-01 | 5.56E-01 | 9.98E-01 | 9.31E-01 | 9.04E-01 |
| 4928   | 0.35(1.28)  | 0.16(0.19)  | -0.46(0.25) | -0.19(1.29) | -0.80(1.30) | -0.62(0.31) | 8.86E-01 | 5.38E-01 | 5.21E-02 | 9.98E-01 | 9.31E-01 | 2.50E-01 |
| 1064   | -0.02(0.16) | -0.11(0.29) | -0.40(0.59) | -0.10(0.33) | -0.38(0.61) | -0.28(0.67) | 7.72E-01 | 5.40E-01 | 6.73E-01 | 9.98E-01 | 9.31E-01 | 9.27E-01 |

|        |             |             |             |             |             |             |          |          |          |          |          |          |
|--------|-------------|-------------|-------------|-------------|-------------|-------------|----------|----------|----------|----------|----------|----------|
| 6331   | 0.07(0.14)  | 0.17(0.52)  | -0.31(0.63) | 0.10(0.53)  | -0.39(0.64) | -0.48(0.80) | 8.55E-01 | 5.48E-01 | 5.47E-01 | 9.98E-01 | 9.31E-01 | 9.04E-01 |
| 41691  | 0.20(0.24)  | 0.05(0.17)  | 0.40(0.26)  | -0.14(0.29) | 0.21(0.35)  | 0.35(0.30)  | 6.23E-01 | 5.48E-01 | 2.50E-01 | 9.98E-01 | 9.31E-01 | 6.72E-01 |
| 4976   | -0.02(0.14) | 0.07(0.33)  | 0.22(0.38)  | 0.08(0.35)  | 0.24(0.40)  | 0.15(0.49)  | 8.13E-01 | 5.51E-01 | 7.52E-01 | 9.98E-01 | 9.31E-01 | 9.30E-01 |
| 41808  | 0.12(0.18)  | 0.14(0.24)  | -0.07(0.27) | 0.02(0.30)  | -0.19(0.32) | -0.21(0.37) | 9.43E-01 | 5.57E-01 | 5.76E-01 | 9.98E-01 | 9.31E-01 | 9.04E-01 |
| 87769  | 0.11(0.19)  | 0.09(0.19)  | -0.10(0.31) | -0.02(0.27) | -0.21(0.36) | -0.19(0.36) | 9.34E-01 | 5.63E-01 | 6.03E-01 | 9.98E-01 | 9.31E-01 | 9.16E-01 |
| 4546   | -0.34(0.40) | -0.06(0.24) | -0.59(0.16) | 0.27(0.47)  | -0.25(0.44) | -0.53(0.28) | 5.65E-01 | 5.66E-01 | 6.91E-02 | 9.98E-01 | 9.31E-01 | 3.06E-01 |
| 490    | 0.10(0.21)  | 0.04(0.18)  | -0.12(0.33) | -0.05(0.27) | -0.22(0.38) | -0.16(0.36) | 8.38E-01 | 5.69E-01 | 6.59E-01 | 9.98E-01 | 9.31E-01 | 9.22E-01 |
| 2806   | -1.26(2.06) | 0.30(0.22)  | -0.08(0.20) | 1.56(2.08)  | 1.18(2.07)  | -0.38(0.30) | 4.57E-01 | 5.70E-01 | 2.18E-01 | 9.98E-01 | 9.31E-01 | 6.33E-01 |
| 106629 | 0.13(0.19)  | 0.18(0.20)  | 0.33(0.30)  | 0.04(0.27)  | 0.20(0.35)  | 0.16(0.36)  | 8.78E-01 | 5.72E-01 | 6.63E-01 | 9.98E-01 | 9.31E-01 | 9.22E-01 |
| 4926   | -0.05(0.79) | 0.03(0.20)  | -0.49(0.18) | 0.09(0.82)  | -0.44(0.81) | -0.52(0.27) | 9.16E-01 | 5.92E-01 | 5.52E-02 | 9.98E-01 | 9.46E-01 | 2.60E-01 |
| 4975   | 0.01(0.18)  | 0.30(0.24)  | 0.16(0.22)  | 0.29(0.29)  | 0.14(0.28)  | -0.15(0.32) | 3.28E-01 | 6.07E-01 | 6.52E-01 | 9.98E-01 | 9.56E-01 | 9.22E-01 |
| 119129 | 2.39(4.43)  | 0.02(0.21)  | 0.11(0.15)  | -2.37(4.44) | -2.28(4.43) | 0.09(0.25)  | 5.96E-01 | 6.08E-01 | 7.34E-01 | 9.98E-01 | 9.56E-01 | 9.29E-01 |
| 1148   | 0.28(0.36)  | -0.09(0.19) | 0.47(0.16)  | -0.37(0.40) | 0.19(0.39)  | 0.56(0.25)  | 3.62E-01 | 6.25E-01 | 2.83E-02 | 9.98E-01 | 9.66E-01 | 1.62E-01 |
| 41699  | 0.11(0.26)  | 0.06(0.17)  | 0.28(0.26)  | -0.05(0.30) | 0.17(0.36)  | 0.23(0.32)  | 8.63E-01 | 6.30E-01 | 4.76E-01 | 9.98E-01 | 9.67E-01 | 8.59E-01 |
| 126397 | 0.08(0.18)  | 0.06(0.20)  | -0.10(0.34) | -0.02(0.26) | -0.18(0.37) | -0.16(0.39) | 9.37E-01 | 6.32E-01 | 6.83E-01 | 9.98E-01 | 9.67E-01 | 9.29E-01 |
| 91     | 0.09(0.26)  | 0.04(0.20)  | -0.07(0.19) | -0.05(0.33) | -0.16(0.33) | -0.10(0.27) | 8.73E-01 | 6.34E-01 | 7.04E-01 | 9.98E-01 | 9.67E-01 | 9.29E-01 |
| 4600   | 0.12(0.27)  | 0.14(0.32)  | 0.26(0.15)  | 0.02(0.43)  | 0.14(0.30)  | 0.12(0.36)  | 9.62E-01 | 6.41E-01 | 7.38E-01 | 9.98E-01 | 9.73E-01 | 9.29E-01 |
| 110    | 0.29(0.34)  | 0.17(0.20)  | 0.47(0.22)  | -0.12(0.39) | 0.18(0.40)  | 0.30(0.29)  | 7.67E-01 | 6.43E-01 | 3.06E-01 | 9.98E-01 | 9.73E-01 | 7.41E-01 |
| 98027  | 0.03(0.19)  | -0.31(0.31) | 0.28(0.51)  | -0.34(0.37) | 0.25(0.55)  | 0.60(0.60)  | 3.62E-01 | 6.45E-01 | 3.22E-01 | 9.98E-01 | 9.73E-01 | 7.41E-01 |
| 120562 | 0.10(0.22)  | 0.07(0.19)  | -0.05(0.28) | -0.04(0.28) | -0.16(0.34) | -0.12(0.33) | 8.92E-01 | 6.52E-01 | 7.22E-01 | 9.98E-01 | 9.74E-01 | 9.29E-01 |
| 42357  | 0.03(0.15)  | -0.08(0.29) | 0.21(0.38)  | -0.10(0.32) | 0.18(0.41)  | 0.29(0.48)  | 7.49E-01 | 6.55E-01 | 5.56E-01 | 9.98E-01 | 9.74E-01 | 9.04E-01 |
| 4986   | 0.10(0.30)  | 0.16(0.22)  | 0.25(0.19)  | 0.06(0.37)  | 0.15(0.36)  | 0.10(0.29)  | 8.75E-01 | 6.65E-01 | 7.38E-01 | 9.98E-01 | 9.74E-01 | 9.29E-01 |
| 479    | 0.11(0.23)  | 0.07(0.19)  | -0.04(0.28) | -0.04(0.28) | -0.15(0.34) | -0.11(0.33) | 8.95E-01 | 6.65E-01 | 7.33E-01 | 9.98E-01 | 9.74E-01 | 9.29E-01 |
| 111162 | 2.33(5.44)  | 0.09(0.22)  | -0.01(0.19) | -2.24(5.43) | -2.34(5.44) | -0.10(0.29) | 6.81E-01 | 6.68E-01 | 7.36E-01 | 9.98E-01 | 9.74E-01 | 9.29E-01 |
| 145494 | 0.12(0.23)  | 0.05(0.16)  | -0.06(0.36) | -0.07(0.28) | -0.18(0.42) | -0.11(0.39) | 8.14E-01 | 6.78E-01 | 7.77E-01 | 9.98E-01 | 9.74E-01 | 9.32E-01 |
| 4898   | 0.04(0.19)  | 0.18(0.26)  | 0.15(0.20)  | 0.14(0.31)  | 0.11(0.27)  | -0.03(0.33) | 6.60E-01 | 6.80E-01 | 9.36E-01 | 9.98E-01 | 9.74E-01 | 9.94E-01 |
| 3286   | 0.12(0.20)  | 0.06(0.18)  | -0.07(0.43) | -0.05(0.26) | -0.19(0.47) | -0.14(0.46) | 8.41E-01 | 6.84E-01 | 7.65E-01 | 9.98E-01 | 9.74E-01 | 9.32E-01 |
| 592    | 0.09(0.28)  | 0.11(0.20)  | -0.05(0.20) | 0.02(0.34)  | -0.14(0.34) | -0.16(0.29) | 9.60E-01 | 6.86E-01 | 5.84E-01 | 9.98E-01 | 9.74E-01 | 9.04E-01 |
| 3232   | 0.10(0.19)  | -0.05(0.22) | 0.21(0.21)  | -0.15(0.29) | 0.11(0.28)  | 0.26(0.30)  | 6.01E-01 | 6.90E-01 | 3.87E-01 | 9.98E-01 | 9.74E-01 | 8.10E-01 |

|        |             |             |              |             |              |              |          |          |          |          |          |          |
|--------|-------------|-------------|--------------|-------------|--------------|--------------|----------|----------|----------|----------|----------|----------|
| 119066 | 0.21(0.19)  | -0.05(0.27) | 0.10(0.20)   | -0.26(0.34) | -0.11(0.28)  | 0.15(0.34)   | 4.47E-01 | 6.94E-01 | 6.64E-01 | 9.98E-01 | 9.74E-01 | 9.22E-01 |
| 4983   | 0.13(0.25)  | 0.05(0.16)  | -0.02(0.31)  | -0.09(0.29) | -0.16(0.40)  | -0.07(0.36)  | 7.69E-01 | 6.95E-01 | 8.42E-01 | 9.98E-01 | 9.74E-01 | 9.46E-01 |
| 6353   | 0.19(0.32)  | -0.04(0.18) | 0.04(0.24)   | -0.23(0.35) | -0.15(0.39)  | 0.08(0.29)   | 5.12E-01 | 6.96E-01 | 7.85E-01 | 9.98E-01 | 9.74E-01 | 9.32E-01 |
| 9392   | 0.06(0.21)  | -0.12(0.24) | 0.18(0.25)   | -0.18(0.31) | 0.12(0.33)   | 0.30(0.36)   | 5.63E-01 | 7.17E-01 | 4.03E-01 | 9.98E-01 | 9.74E-01 | 8.20E-01 |
| 448    | 0.06(0.19)  | 0.05(0.19)  | -0.08(0.35)  | -0.02(0.26) | -0.14(0.40)  | -0.13(0.39)  | 9.47E-01 | 7.18E-01 | 7.51E-01 | 9.98E-01 | 9.74E-01 | 9.30E-01 |
| 4933   | 0.02(0.15)  | -0.17(0.34) | -0.10(0.29)  | -0.18(0.38) | -0.12(0.33)  | 0.07(0.44)   | 6.27E-01 | 7.20E-01 | 8.82E-01 | 9.98E-01 | 9.74E-01 | 9.66E-01 |
| 7402   | -0.08(1.05) | 0.10(0.22)  | 0.31(0.25)   | 0.18(1.07)  | 0.38(1.08)   | 0.21(0.33)   | 8.70E-01 | 7.23E-01 | 5.33E-01 | 9.98E-01 | 9.74E-01 | 8.92E-01 |
| 915    | -0.83(3.11) | 0.21(0.22)  | 0.27(0.22)   | 1.04(3.11)  | 1.09(3.11)   | 0.05(0.31)   | 7.39E-01 | 7.26E-01 | 8.70E-01 | 9.98E-01 | 9.74E-01 | 9.56E-01 |
| 17453  | 0.05(0.17)  | 0.08(0.25)  | 0.15(0.22)   | 0.03(0.30)  | 0.10(0.29)   | 0.07(0.33)   | 9.13E-01 | 7.26E-01 | 8.39E-01 | 9.98E-01 | 9.74E-01 | 9.46E-01 |
| 1675   | 0.07(0.15)  | -0.27(1.00) | -0.02(0.21)  | -0.34(1.01) | -0.09(0.26)  | 0.25(1.02)   | 7.39E-01 | 7.34E-01 | 8.08E-01 | 9.98E-01 | 9.74E-01 | 9.43E-01 |
| 17263  | 0.07(0.19)  | 0.08(0.21)  | -0.06(0.36)  | 0.01(0.28)  | -0.13(0.40)  | -0.14(0.41)  | 9.71E-01 | 7.44E-01 | 7.35E-01 | 9.98E-01 | 9.80E-01 | 9.29E-01 |
| 1872   | 0.14(0.19)  | 0.29(0.25)  | 0.05(0.21)   | 0.15(0.30)  | -0.09(0.27)  | -0.23(0.32)  | 6.33E-01 | 7.49E-01 | 4.64E-01 | 9.98E-01 | 9.82E-01 | 8.50E-01 |
| 6538   | 0.12(0.20)  | -0.05(0.23) | 0.21(0.23)   | -0.17(0.30) | 0.10(0.30)   | 0.27(0.32)   | 5.65E-01 | 7.50E-01 | 4.04E-01 | 9.98E-01 | 9.82E-01 | 8.20E-01 |
| 130396 | 0.09(0.24)  | 0.10(0.17)  | -0.01(0.25)  | -0.00(0.29) | -0.10(0.33)  | -0.11(0.30)  | 9.92E-01 | 7.61E-01 | 7.24E-01 | 9.98E-01 | 9.89E-01 | 9.29E-01 |
| 5900   | 0.13(0.21)  | 0.10(0.17)  | 0.23(0.30)   | -0.03(0.27) | 0.10(0.36)   | 0.13(0.35)   | 9.06E-01 | 7.85E-01 | 7.08E-01 | 9.98E-01 | 9.94E-01 | 9.29E-01 |
| 120526 | 0.04(0.21)  | 0.06(0.21)  | -0.05(0.28)  | 0.02(0.28)  | -0.09(0.33)  | -0.11(0.34)  | 9.35E-01 | 7.89E-01 | 7.39E-01 | 9.98E-01 | 9.94E-01 | 9.29E-01 |
| 5085   | -0.38(0.41) | 0.12(0.27)  | -0.26(0.17)  | 0.50(0.50)  | 0.12(0.44)   | -0.38(0.32)  | 3.22E-01 | 7.91E-01 | 2.41E-01 | 9.98E-01 | 9.94E-01 | 6.67E-01 |
| 119023 | -0.03(0.40) | 0.03(0.20)  | 0.08(0.16)   | 0.06(0.45)  | 0.11(0.43)   | 0.05(0.26)   | 9.01E-01 | 8.01E-01 | 8.41E-01 | 9.98E-01 | 9.94E-01 | 9.46E-01 |
| 87720  | 0.40(0.23)  | 0.14(0.18)  | 0.32(0.21)   | -0.26(0.29) | -0.08(0.31)  | 0.18(0.27)   | 3.77E-01 | 8.07E-01 | 5.13E-01 | 9.98E-01 | 9.94E-01 | 8.87E-01 |
| 26916  | 0.05(0.12)  | 0.37(1.55)  | -3.94(16.31) | 0.32(1.56)  | -3.99(16.30) | -4.31(16.35) | 8.38E-01 | 8.07E-01 | 7.93E-01 | 9.98E-01 | 9.94E-01 | 9.37E-01 |
| 4929   | 0.25(0.36)  | 0.26(0.19)  | 0.16(0.20)   | 0.01(0.40)  | -0.09(0.40)  | -0.10(0.27)  | 9.72E-01 | 8.25E-01 | 7.06E-01 | 9.98E-01 | 9.94E-01 | 9.29E-01 |
| 137    | 0.02(0.22)  | 0.24(0.22)  | -0.04(0.20)  | 0.22(0.31)  | -0.07(0.30)  | -0.28(0.30)  | 4.91E-01 | 8.26E-01 | 3.53E-01 | 9.98E-01 | 9.94E-01 | 7.70E-01 |
| 1996   | 0.24(0.24)  | 0.10(0.19)  | 0.30(0.21)   | -0.14(0.30) | 0.07(0.31)   | 0.21(0.28)   | 6.39E-01 | 8.30E-01 | 4.64E-01 | 9.98E-01 | 9.94E-01 | 8.50E-01 |
| 32247  | -0.04(0.24) | 0.07(0.20)  | 0.03(0.20)   | 0.11(0.31)  | 0.07(0.32)   | -0.04(0.28)  | 7.36E-01 | 8.36E-01 | 8.86E-01 | 9.98E-01 | 9.94E-01 | 9.66E-01 |
| 61     | 0.07(0.25)  | 0.21(0.35)  | 0.13(0.15)   | 0.13(0.43)  | 0.06(0.29)   | -0.08(0.38)  | 7.56E-01 | 8.41E-01 | 8.45E-01 | 9.98E-01 | 9.94E-01 | 9.46E-01 |
| 26918  | 0.05(0.12)  | 0.32(1.57)  | 2.24(11.04)  | 0.27(1.57)  | 2.18(11.04)  | 1.91(11.11)  | 8.63E-01 | 8.44E-01 | 8.64E-01 | 9.98E-01 | 9.94E-01 | 9.52E-01 |
| 1704   | 0.19(0.25)  | 0.12(0.18)  | 0.12(0.22)   | -0.07(0.30) | -0.06(0.33)  | 0.00(0.28)   | 8.27E-01 | 8.50E-01 | 9.89E-01 | 9.98E-01 | 9.94E-01 | 9.97E-01 |
| 160542 | 0.71(1.51)  | 0.20(0.32)  | 0.42(0.13)   | -0.51(1.51) | -0.29(1.51)  | 0.22(0.35)   | 7.38E-01 | 8.51E-01 | 5.20E-01 | 9.98E-01 | 9.94E-01 | 8.92E-01 |

|        |             |             |             |             |             |             |          |          |          |          |          |          |
|--------|-------------|-------------|-------------|-------------|-------------|-------------|----------|----------|----------|----------|----------|----------|
| 4609   | 0.23(0.86)  | 0.19(0.23)  | 0.39(0.23)  | -0.04(0.89) | 0.16(0.89)  | 0.20(0.33)  | 9.64E-01 | 8.55E-01 | 5.36E-01 | 9.98E-01 | 9.94E-01 | 8.94E-01 |
| 4543   | 0.14(0.39)  | 0.12(0.20)  | 0.06(0.21)  | -0.02(0.44) | -0.08(0.44) | -0.06(0.29) | 9.68E-01 | 8.58E-01 | 8.35E-01 | 9.98E-01 | 9.94E-01 | 9.46E-01 |
| 106936 | 0.15(0.23)  | 0.04(0.19)  | 0.09(0.24)  | -0.11(0.28) | -0.06(0.33) | 0.05(0.30)  | 7.05E-01 | 8.65E-01 | 8.64E-01 | 9.98E-01 | 9.94E-01 | 9.52E-01 |
| 139436 | 0.29(0.59)  | 0.33(0.31)  | 0.38(0.15)  | 0.04(0.66)  | 0.09(0.61)  | 0.06(0.33)  | 9.57E-01 | 8.77E-01 | 8.62E-01 | 9.98E-01 | 9.94E-01 | 9.52E-01 |
| 135889 | -0.20(0.26) | -0.25(0.26) | -0.95(4.92) | -0.05(0.36) | -0.76(4.95) | -0.70(4.93) | 8.83E-01 | 8.79E-01 | 8.87E-01 | 9.98E-01 | 9.94E-01 | 9.66E-01 |
| 160464 | 0.80(2.86)  | 0.19(0.23)  | 0.37(0.19)  | -0.61(2.87) | -0.44(2.86) | 0.18(0.30)  | 8.32E-01 | 8.79E-01 | 5.54E-01 | 9.98E-01 | 9.94E-01 | 9.04E-01 |
| 34075  | 0.22(0.21)  | -0.25(0.20) | 0.18(0.21)  | -0.48(0.29) | -0.04(0.30) | 0.44(0.29)  | 1.07E-01 | 8.88E-01 | 1.37E-01 | 9.98E-01 | 9.94E-01 | 4.95E-01 |
| 31559  | -0.01(0.32) | 0.12(0.89)  | -0.06(0.13) | 0.13(0.93)  | -0.05(0.35) | -0.18(0.89) | 8.91E-01 | 8.89E-01 | 8.44E-01 | 9.98E-01 | 9.94E-01 | 9.46E-01 |
| 121002 | 0.09(0.21)  | 0.11(0.22)  | 0.13(0.23)  | 0.02(0.30)  | 0.04(0.29)  | 0.02(0.32)  | 9.43E-01 | 8.91E-01 | 9.54E-01 | 9.98E-01 | 9.94E-01 | 9.95E-01 |
| 39     | 0.11(0.19)  | 0.16(0.23)  | 0.15(0.27)  | 0.05(0.30)  | 0.04(0.31)  | 0.00(0.35)  | 8.78E-01 | 8.93E-01 | 9.93E-01 | 9.98E-01 | 9.94E-01 | 9.98E-01 |
| 2011   | 0.04(0.21)  | 0.19(0.22)  | 0.00(0.21)  | 0.15(0.30)  | -0.04(0.29) | -0.19(0.31) | 6.15E-01 | 8.98E-01 | 5.46E-01 | 9.98E-01 | 9.94E-01 | 9.04E-01 |
| 145492 | 0.29(0.30)  | 0.01(0.20)  | 0.34(0.19)  | -0.28(0.36) | 0.04(0.35)  | 0.33(0.27)  | 4.29E-01 | 8.99E-01 | 2.32E-01 | 9.98E-01 | 9.94E-01 | 6.54E-01 |
| 106634 | 0.08(0.17)  | 0.06(0.21)  | 0.02(0.44)  | -0.02(0.26) | -0.06(0.47) | -0.04(0.48) | 9.43E-01 | 8.99E-01 | 9.34E-01 | 9.98E-01 | 9.94E-01 | 9.94E-01 |
| 17253  | 0.56(0.66)  | 0.14(0.23)  | 0.48(0.18)  | -0.42(0.70) | -0.08(0.69) | 0.34(0.30)  | 5.51E-01 | 9.07E-01 | 2.57E-01 | 9.98E-01 | 9.94E-01 | 6.82E-01 |
| 453    | -0.02(0.19) | 0.15(0.21)  | 0.02(0.30)  | 0.17(0.28)  | 0.04(0.35)  | -0.13(0.36) | 5.54E-01 | 9.08E-01 | 7.28E-01 | 9.98E-01 | 9.94E-01 | 9.29E-01 |
| 135619 | -0.04(0.28) | -0.10(0.26) | -0.08(0.17) | -0.06(0.40) | -0.04(0.34) | 0.02(0.30)  | 8.86E-01 | 9.13E-01 | 9.47E-01 | 9.98E-01 | 9.94E-01 | 9.94E-01 |
| 657    | 0.07(0.24)  | 0.03(0.17)  | 0.04(0.24)  | -0.05(0.29) | -0.03(0.34) | 0.02(0.29)  | 8.71E-01 | 9.24E-01 | 9.58E-01 | 9.98E-01 | 9.94E-01 | 9.95E-01 |
| 122151 | 0.02(0.21)  | 0.08(0.21)  | -0.01(0.28) | 0.05(0.28)  | -0.03(0.34) | -0.09(0.34) | 8.46E-01 | 9.26E-01 | 7.99E-01 | 9.98E-01 | 9.94E-01 | 9.41E-01 |
| 4936   | 0.08(0.19)  | 0.06(0.21)  | 0.19(1.29)  | -0.02(0.28) | 0.11(1.30)  | 0.13(1.29)  | 9.45E-01 | 9.32E-01 | 9.20E-01 | 9.98E-01 | 9.94E-01 | 9.85E-01 |
| 7440   | 1.00(2.30)  | 0.12(0.17)  | 0.81(0.22)  | -0.88(2.31) | -0.20(2.31) | 0.69(0.28)  | 7.04E-01 | 9.33E-01 | 1.61E-02 | 9.98E-01 | 9.94E-01 | 1.24E-01 |
| 93385  | 0.12(0.28)  | 0.10(0.20)  | 0.09(0.20)  | -0.01(0.34) | -0.03(0.34) | -0.01(0.28) | 9.70E-01 | 9.38E-01 | 9.61E-01 | 9.98E-01 | 9.94E-01 | 9.95E-01 |
| 3029   | 0.06(0.12)  | 0.28(0.67)  | -0.05(1.33) | 0.22(0.68)  | -0.10(1.34) | -0.33(1.47) | 7.42E-01 | 9.39E-01 | 8.25E-01 | 9.98E-01 | 9.94E-01 | 9.46E-01 |
| 4985   | 0.21(0.43)  | 0.20(0.21)  | 0.18(0.24)  | -0.01(0.47) | -0.03(0.49) | -0.02(0.32) | 9.80E-01 | 9.45E-01 | 9.45E-01 | 9.98E-01 | 9.94E-01 | 9.94E-01 |
| 17664  | 0.07(0.23)  | 0.07(0.18)  | 0.04(0.24)  | -0.00(0.29) | -0.02(0.33) | -0.02(0.29) | 9.98E-01 | 9.47E-01 | 9.42E-01 | 9.98E-01 | 9.94E-01 | 9.94E-01 |
| 307    | 0.08(0.21)  | 0.16(0.19)  | 0.10(0.25)  | 0.08(0.28)  | 0.02(0.32)  | -0.06(0.32) | 7.76E-01 | 9.53E-01 | 8.50E-01 | 9.98E-01 | 9.94E-01 | 9.48E-01 |
| 93947  | 0.08(0.32)  | 0.03(0.16)  | 0.10(0.25)  | -0.05(0.35) | 0.02(0.40)  | 0.07(0.29)  | 8.88E-01 | 9.64E-01 | 8.15E-01 | 9.98E-01 | 9.94E-01 | 9.44E-01 |
| 139478 | -0.13(2.18) | 0.12(0.21)  | -0.03(0.29) | 0.25(2.18)  | 0.10(2.20)  | -0.15(0.35) | 9.09E-01 | 9.64E-01 | 6.67E-01 | 9.98E-01 | 9.94E-01 | 9.22E-01 |
| 4533   | 0.15(0.33)  | 0.01(0.28)  | 0.16(0.16)  | -0.14(0.43) | 0.01(0.36)  | 0.15(0.32)  | 7.53E-01 | 9.68E-01 | 6.38E-01 | 9.98E-01 | 9.94E-01 | 9.17E-01 |
| 16788  | -0.01(0.37) | 0.09(0.24)  | 0.00(0.15)  | 0.10(0.43)  | 0.02(0.40)  | -0.08(0.28) | 8.20E-01 | 9.70E-01 | 7.66E-01 | 9.98E-01 | 9.94E-01 | 9.32E-01 |

|        |            |             |            |             |             |             |          |          |          |          |          |          |
|--------|------------|-------------|------------|-------------|-------------|-------------|----------|----------|----------|----------|----------|----------|
| 13107  | 0.10(0.21) | 0.11(0.18)  | 0.12(0.32) | -0.00(0.27) | 0.01(0.38)  | 0.01(0.37)  | 9.94E-01 | 9.70E-01 | 9.74E-01 | 9.98E-01 | 9.94E-01 | 9.95E-01 |
| 121890 | 0.05(0.12) | 0.05(0.81)  | 0.08(0.78) | -0.00(0.81) | 0.03(0.79)  | 0.03(1.14)  | 9.96E-01 | 9.71E-01 | 9.77E-01 | 9.98E-01 | 9.94E-01 | 9.95E-01 |
| 2900   | 0.20(0.21) | -0.09(0.21) | 0.18(0.27) | -0.28(0.31) | -0.01(0.34) | 0.27(0.34)  | 3.67E-01 | 9.71E-01 | 4.33E-01 | 9.98E-01 | 9.94E-01 | 8.47E-01 |
| 133943 | 0.29(0.42) | 0.11(0.21)  | 0.27(0.19) | -0.18(0.46) | -0.02(0.46) | 0.17(0.29)  | 6.97E-01 | 9.73E-01 | 5.67E-01 | 9.98E-01 | 9.94E-01 | 9.04E-01 |
| 17537  | 0.08(0.22) | 0.11(0.19)  | 0.09(0.27) | 0.02(0.28)  | 0.01(0.34)  | -0.01(0.32) | 9.31E-01 | 9.74E-01 | 9.67E-01 | 9.98E-01 | 9.94E-01 | 9.95E-01 |
| 16561  | 0.08(0.20) | 0.08(0.18)  | 0.09(0.38) | -0.00(0.26) | 0.01(0.42)  | 0.01(0.42)  | 9.95E-01 | 9.74E-01 | 9.78E-01 | 9.98E-01 | 9.94E-01 | 9.95E-01 |
| 5419   | 0.19(0.52) | 0.12(0.19)  | 0.20(0.18) | -0.07(0.54) | 0.02(0.54)  | 0.08(0.26)  | 9.02E-01 | 9.76E-01 | 7.55E-01 | 9.98E-01 | 9.94E-01 | 9.30E-01 |
| 68     | 0.09(0.20) | 0.17(0.25)  | 0.09(0.19) | 0.08(0.31)  | -0.01(0.27) | -0.09(0.32) | 8.03E-01 | 9.77E-01 | 7.86E-01 | 9.98E-01 | 9.94E-01 | 9.32E-01 |
| 107960 | 0.22(0.24) | 0.04(0.17)  | 0.23(0.31) | -0.18(0.28) | 0.01(0.39)  | 0.19(0.35)  | 5.21E-01 | 9.82E-01 | 5.85E-01 | 9.98E-01 | 9.94E-01 | 9.04E-01 |
| 1700   | 0.06(0.39) | 0.06(0.14)  | 0.06(0.72) | -0.01(0.41) | -0.01(0.81) | 0.00(0.73)  | 9.86E-01 | 9.94E-01 | 9.98E-01 | 9.98E-01 | 9.94E-01 | 9.98E-01 |

Regression coefficient  $\beta^*$  (standard error (SE)) denotes the association between baseline level of each metabolite and change in FPG in each intervention group (IMI, BAND or RYGB).  $\beta^\dagger$  (SE) denotes the association between baseline level of each metabolite and change in FPG induced by different types of weight-loss interventions (BAND vs. IMI, RYGB vs. IMI, and RYGB vs. BAND), and was obtained from the interaction term (metabolite  $\times$  types of intervention) in a linear regression model. In this model, % change in FPG (follow-up value minus baseline value, divided by baseline value) was the dependent variable, baseline level of each metabolite, intervention groups (1=IMI, 2=BAND, 3=RYGB, with IMI being the reference), and an interaction term (metabolite  $\times$  types of intervention) were the independent variables, adjusting for baseline age, sex, BMI as well as weight loss. Abbreviations: IMI: Intensive medical intervention. BAND: Laparoscopic adjustable banding. RYGB: Roux-en-Y gastric bypass surgery.

**Table S2. A full list of baseline plasma metabolites associated with change in HbA1c before and 1-yr after intervention**

| Metabolites                                          | $\beta^*$ (SE) |             |             | $\beta^+$ (SE) |              |               | p-value      |              |               | q-value      |              |               |
|------------------------------------------------------|----------------|-------------|-------------|----------------|--------------|---------------|--------------|--------------|---------------|--------------|--------------|---------------|
|                                                      | IMI            | BAND        | RYGB        | BAND vs. IMI   | RYGB vs. IMI | RYGB vs. BAND | BAND vs. IMI | RYGB vs. IMI | RYGB vs. BAND | BAND vs. IMI | RYGB vs. IMI | RYGB vs. BAND |
| <b>Known</b>                                         |                |             |             |                |              |               |              |              |               |              |              |               |
| 1,5-anhydroglucitol                                  | -0.14(0.15)    | 0.17(0.13)  | 0.83(0.14)  | 0.31(0.20)     | 0.97(0.21)   | 0.66(0.19)    | 1.19E-01     | 1.44E-05     | 9.77E-04      | 9.98E-01     | 5.44E-03     | 4.60E-02      |
| 1-monopalmitin                                       | 0.06(0.17)     | 0.08(0.13)  | 0.37(0.18)  | 0.02(0.21)     | 0.31(0.24)   | 0.28(0.22)    | 9.18E-01     | 2.14E-01     | 1.97E-01      | 9.98E-01     | 4.79E-01     | 4.66E-01      |
| 1-monostearin                                        | -0.09(0.11)    | -0.07(0.20) | 0.66(0.23)  | 0.01(0.23)     | 0.74(0.26)   | 0.73(0.30)    | 9.63E-01     | 5.28E-03     | 1.86E-02      | 9.98E-01     | 8.78E-02     | 1.75E-01      |
| 2,3-dihydroxybutanoic acid NIST                      | -0.04(0.13)    | 0.08(0.20)  | -0.02(0.17) | 0.11(0.24)     | 0.02(0.21)   | -0.09(0.26)   | 6.33E-01     | 9.24E-01     | 7.27E-01      | 9.98E-01     | 9.73E-01     | 8.62E-01      |
| 2,4-diaminobutyric acid                              | 0.00(0.16)     | -0.07(0.16) | 0.41(0.14)  | -0.07(0.22)    | 0.42(0.21)   | 0.49(0.21)    | 7.46E-01     | 4.68E-02     | 2.38E-02      | 9.98E-01     | 2.13E-01     | 1.99E-01      |
| 2-deoxyisotetronic acid NIST                         | -0.06(0.15)    | 0.19(0.19)  | -0.08(0.15) | 0.24(0.24)     | -0.03(0.22)  | -0.27(0.24)   | 3.26E-01     | 9.05E-01     | 2.66E-01      | 9.98E-01     | 9.63E-01     | 5.22E-01      |
| 2-deoxytetronic acid                                 | 0.00(0.17)     | 0.12(0.19)  | 0.07(0.16)  | 0.12(0.24)     | 0.07(0.23)   | -0.05(0.24)   | 6.13E-01     | 7.45E-01     | 8.43E-01      | 9.98E-01     | 9.21E-01     | 9.34E-01      |
| 2-hydroxybutanoic acid                               | 0.07(0.18)     | -0.11(0.15) | -0.53(0.12) | -0.18(0.23)    | -0.60(0.22)  | -0.42(0.19)   | 4.41E-01     | 6.75E-03     | 3.28E-02      | 9.98E-01     | 9.44E-02     | 2.34E-01      |
| 2-hydroxyglutaric acid                               | -0.01(0.15)    | 0.19(0.16)  | 0.46(0.13)  | 0.20(0.22)     | 0.47(0.20)   | 0.27(0.20)    | 3.66E-01     | 2.00E-02     | 1.73E-01      | 9.98E-01     | 1.57E-01     | 4.42E-01      |
| 2-hydroxypyrazinyl-2-propenoic acid ethyl ester NIST | 0.08(0.12)     | -0.10(0.16) | 0.62(0.16)  | -0.18(0.20)    | 0.54(0.20)   | 0.72(0.23)    | 3.76E-01     | 7.57E-03     | 2.13E-03      | 9.98E-01     | 9.52E-02     | 6.68E-02      |
| 2-hydroxyvaleric acid                                | 0.02(0.28)     | -0.11(0.16) | -0.09(0.16) | -0.14(0.32)    | -0.11(0.32)  | 0.03(0.22)    | 6.74E-01     | 7.40E-01     | 9.02E-01      | 9.98E-01     | 9.21E-01     | 9.66E-01      |
| 2-piperidinobenzonitrile NIST                        | -0.05(0.16)    | 0.12(0.14)  | 0.42(0.23)  | 0.17(0.20)     | 0.47(0.27)   | 0.30(0.26)    | 4.04E-01     | 8.56E-02     | 2.57E-01      | 9.98E-01     | 2.99E-01     | 5.17E-01      |
| 3-(1-pyrazolyl)-L-alanine                            | -0.08(0.30)    | -0.10(0.55) | -0.05(0.10) | -0.01(0.62)    | 0.04(0.32)   | 0.05(0.56)    | 9.82E-01     | 9.10E-01     | 9.29E-01      | 9.98E-01     | 9.66E-01     | 9.79E-01      |
| 3,6-anhydro-D-galactose                              | 0.07(0.29)     | 0.08(0.22)  | -0.04(0.12) | 0.01(0.37)     | -0.11(0.32)  | -0.12(0.24)   | 9.80E-01     | 7.37E-01     | 6.32E-01      | 9.98E-01     | 9.21E-01     | 8.02E-01      |
| 3-aminoisobutyric acid                               | 0.02(0.14)     | 0.08(0.12)  | 1.05(0.37)  | 0.07(0.18)     | 1.04(0.40)   | 0.97(0.39)    | 7.10E-01     | 1.16E-02     | 1.59E-02      | 9.98E-01     | 1.11E-01     | 1.65E-01      |
| 3-hydroxybutyric acid                                | 0.11(0.20)     | -0.08(0.15) | -0.21(0.14) | -0.19(0.26)    | -0.31(0.25)  | -0.13(0.21)   | 4.65E-01     | 2.05E-01     | 5.53E-01      | 9.98E-01     | 4.71E-01     | 7.64E-01      |
| 4-hydroxyphenylacetic acid                           | -0.05(0.21)    | 0.12(0.22)  | -0.02(0.12) | 0.17(0.30)     | 0.03(0.24)   | -0.13(0.25)   | 5.85E-01     | 8.95E-01     | 5.97E-01      | 9.98E-01     | 9.63E-01     | 8.02E-01      |
| Acetaminophen                                        | -0.23(0.35)    | 0.14(0.14)  | 0.35(0.12)  | 0.36(0.37)     | 0.57(0.37)   | 0.21(0.18)    | 3.33E-01     | 1.24E-01     | 2.47E-01      | 9.98E-01     | 3.59E-01     | 5.11E-01      |



|                           |             |             |             |             |             |             |          |          |          |          |          |          |
|---------------------------|-------------|-------------|-------------|-------------|-------------|-------------|----------|----------|----------|----------|----------|----------|
| Aconitic acid             | 0.03(0.21)  | 0.09(0.19)  | -0.02(0.12) | 0.06(0.28)  | -0.05(0.24) | -0.11(0.23) | 8.23E-01 | 8.51E-01 | 6.35E-01 | 9.98E-01 | 9.48E-01 | 8.02E-01 |
| Adenosine-5-monophosphate | -0.03(0.13) | 0.08(0.14)  | 0.62(0.20)  | 0.11(0.19)  | 0.64(0.24)  | 0.54(0.24)  | 5.85E-01 | 7.98E-03 | 2.98E-02 | 9.98E-01 | 9.70E-02 | 2.29E-01 |
| Alanine                   | 0.08(0.17)  | 0.08(0.17)  | 0.17(0.14)  | -0.01(0.24) | 0.09(0.22)  | 0.10(0.23)  | 9.82E-01 | 6.84E-01 | 6.76E-01 | 9.98E-01 | 8.82E-01 | 8.21E-01 |
| Allantoic acid            | -0.13(0.15) | -0.05(0.20) | 0.64(0.38)  | 0.08(0.25)  | 0.77(0.41)  | 0.69(0.43)  | 7.66E-01 | 6.55E-02 | 1.12E-01 | 9.98E-01 | 2.77E-01 | 3.60E-01 |
| Allantoin                 | -0.63(1.63) | -0.05(0.13) | 0.77(0.15)  | 0.58(1.64)  | 1.41(1.64)  | 0.83(0.20)  | 7.24E-01 | 3.94E-01 | 9.99E-05 | 9.98E-01 | 6.84E-01 | 1.26E-02 |
| Alloxanoic acid NIST      | 0.01(0.20)  | 0.10(0.11)  | 0.69(0.24)  | 0.09(0.22)  | 0.68(0.30)  | 0.59(0.26)  | 6.84E-01 | 2.75E-02 | 2.83E-02 | 9.98E-01 | 1.76E-01 | 2.22E-01 |
| Aminomalonate             | 0.07(0.13)  | 0.26(0.18)  | 0.42(0.15)  | 0.18(0.21)  | 0.35(0.20)  | 0.16(0.23)  | 3.98E-01 | 8.54E-02 | 4.79E-01 | 9.98E-01 | 2.99E-01 | 7.14E-01 |
| Arabitol                  | -0.05(0.22) | 0.11(0.24)  | 0.03(0.11)  | 0.16(0.33)  | 0.08(0.25)  | -0.08(0.27) | 6.20E-01 | 7.43E-01 | 7.61E-01 | 9.98E-01 | 9.21E-01 | 8.88E-01 |
| Arachidic acid            | -0.04(0.16) | 0.10(0.18)  | 0.32(0.14)  | 0.14(0.25)  | 0.36(0.22)  | 0.22(0.23)  | 5.81E-01 | 1.01E-01 | 3.28E-01 | 9.98E-01 | 3.25E-01 | 5.80E-01 |
| Arachidonic acid          | 0.14(0.16)  | -0.09(0.17) | 0.29(0.13)  | -0.23(0.23) | 0.15(0.21)  | 0.38(0.21)  | 3.16E-01 | 4.75E-01 | 7.68E-02 | 9.98E-01 | 7.26E-01 | 3.08E-01 |
| Asparagine                | 0.13(0.20)  | -0.01(0.15) | 0.08(0.14)  | -0.15(0.24) | -0.06(0.24) | 0.09(0.20)  | 5.42E-01 | 8.08E-01 | 6.57E-01 | 9.98E-01 | 9.44E-01 | 8.12E-01 |
| Aspartic acid             | 0.05(0.18)  | 0.19(0.14)  | 0.14(0.18)  | 0.13(0.23)  | 0.09(0.25)  | -0.05(0.22) | 5.54E-01 | 7.37E-01 | 8.27E-01 | 9.98E-01 | 9.21E-01 | 9.33E-01 |
| Behenic acid              | -0.03(0.10) | -0.47(0.18) | 0.71(0.31)  | -0.44(0.21) | 0.74(0.32)  | 1.18(0.36)  | 4.35E-02 | 2.36E-02 | 1.77E-03 | 9.98E-01 | 1.63E-01 | 6.08E-02 |
| Benzoic acid              | -0.06(0.39) | 0.04(0.14)  | 0.57(0.21)  | 0.10(0.41)  | 0.64(0.43)  | 0.54(0.25)  | 8.07E-01 | 1.46E-01 | 3.53E-02 | 9.98E-01 | 3.87E-01 | 2.34E-01 |
| Beta-alanine              | -0.03(0.14) | 0.11(0.15)  | 0.23(0.19)  | 0.14(0.21)  | 0.26(0.23)  | 0.12(0.24)  | 5.12E-01 | 2.71E-01 | 6.21E-01 | 9.98E-01 | 5.63E-01 | 8.02E-01 |
| Butane-2,3-diol NIST      | -0.03(0.14) | -0.23(0.15) | -0.49(1.09) | -0.20(0.20) | -0.46(1.09) | -0.26(1.10) | 3.37E-01 | 6.77E-01 | 8.14E-01 | 9.98E-01 | 8.80E-01 | 9.27E-01 |
| Capric acid               | 0.00(0.29)  | 0.02(0.16)  | 0.49(0.12)  | 0.02(0.33)  | 0.49(0.31)  | 0.47(0.20)  | 9.51E-01 | 1.17E-01 | 1.95E-02 | 9.98E-01 | 3.42E-01 | 1.80E-01 |
| Caprylic acid             | 0.06(0.20)  | 0.12(0.17)  | 0.39(0.12)  | 0.06(0.26)  | 0.33(0.23)  | 0.26(0.21)  | 8.09E-01 | 1.55E-01 | 2.11E-01 | 9.98E-01 | 3.97E-01 | 4.73E-01 |
| Cellobiose minor          | -0.03(0.13) | 0.15(0.18)  | 0.32(0.17)  | 0.18(0.22)  | 0.35(0.21)  | 0.17(0.24)  | 4.03E-01 | 1.05E-01 | 4.96E-01 | 9.98E-01 | 3.27E-01 | 7.19E-01 |
| Cholesterol               | -0.05(0.26) | 0.08(0.12)  | 0.30(0.23)  | 0.13(0.29)  | 0.34(0.34)  | 0.22(0.25)  | 6.64E-01 | 3.22E-01 | 4.01E-01 | 9.98E-01 | 6.04E-01 | 6.57E-01 |
| Citric acid               | 0.09(0.13)  | 0.10(0.14)  | 0.79(0.21)  | 0.01(0.18)  | 0.70(0.24)  | 0.68(0.25)  | 9.38E-01 | 4.41E-03 | 7.16E-03 | 9.98E-01 | 7.92E-02 | 1.23E-01 |
| Conduritol-beta-expoxide  | 0.07(0.16)  | 0.01(0.13)  | 0.52(0.16)  | -0.06(0.21) | 0.45(0.22)  | 0.51(0.20)  | 7.66E-01 | 4.49E-02 | 1.41E-02 | 9.98E-01 | 2.12E-01 | 1.53E-01 |
| Creatinine                | 0.02(0.14)  | -0.15(0.15) | -0.12(0.26) | -0.16(0.20) | -0.13(0.28) | 0.03(0.29)  | 4.10E-01 | 6.40E-01 | 9.22E-01 | 9.98E-01 | 8.46E-01 | 9.79E-01 |
| Cysteine                  | -0.08(0.17) | -0.11(0.25) | 0.05(0.12)  | -0.03(0.30) | 0.13(0.21)  | 0.17(0.28)  | 9.08E-01 | 5.30E-01 | 5.47E-01 | 9.98E-01 | 7.66E-01 | 7.63E-01 |
| Cysteine-glycine          | 0.03(0.23)  | 0.08(0.17)  | -0.16(0.12) | 0.05(0.29)  | -0.19(0.26) | -0.23(0.21) | 8.71E-01 | 4.78E-01 | 2.66E-01 | 9.98E-01 | 7.26E-01 | 5.22E-01 |
| Cystine                   | -0.09(0.17) | -0.08(0.15) | -0.48(0.17) | 0.01(0.22)  | -0.39(0.23) | -0.40(0.23) | 9.80E-01 | 9.81E-02 | 8.60E-02 | 9.98E-01 | 3.24E-01 | 3.21E-01 |
| Dehydroabiestic acid      | -0.11(0.17) | 0.22(0.33)  | 0.22(0.19)  | 0.33(0.37)  | 0.32(0.25)  | 0.00(0.38)  | 3.80E-01 | 2.10E-01 | 9.90E-01 | 9.98E-01 | 4.77E-01 | 9.94E-01 |
| Deoxycholic acid          | 0.05(0.13)  | 0.01(0.22)  | 0.02(0.17)  | -0.04(0.25) | -0.04(0.21) | 0.01(0.27)  | 8.62E-01 | 8.60E-01 | 9.83E-01 | 9.98E-01 | 9.48E-01 | 9.94E-01 |

|                               |             |             |             |             |             |             |          |          |          |          |          |          |
|-------------------------------|-------------|-------------|-------------|-------------|-------------|-------------|----------|----------|----------|----------|----------|----------|
| Dodecanol                     | 0.01(0.13)  | 0.04(0.16)  | 0.49(0.17)  | 0.04(0.20)  | 0.49(0.21)  | 0.45(0.23)  | 8.53E-01 | 2.66E-02 | 5.61E-02 | 9.98E-01 | 1.76E-01 | 2.77E-01 |
| Erythritol                    | -0.03(0.23) | 0.21(0.21)  | -0.11(0.12) | 0.24(0.31)  | -0.08(0.25) | -0.32(0.24) | 4.44E-01 | 7.44E-01 | 1.83E-01 | 9.98E-01 | 9.21E-01 | 4.53E-01 |
| Ethanolamine                  | 0.08(0.16)  | 0.33(0.19)  | 0.22(0.13)  | 0.25(0.24)  | 0.14(0.21)  | -0.11(0.23) | 3.06E-01 | 5.07E-01 | 6.30E-01 | 9.98E-01 | 7.49E-01 | 8.02E-01 |
| Fructose                      | 0.17(0.31)  | -0.19(0.27) | -0.13(0.13) | -0.35(0.40) | -0.29(0.34) | 0.06(0.31)  | 3.76E-01 | 3.84E-01 | 8.47E-01 | 9.98E-01 | 6.83E-01 | 9.34E-01 |
| Fucose                        | 0.00(0.20)  | 0.07(0.18)  | 0.01(0.13)  | 0.07(0.27)  | 0.02(0.24)  | -0.05(0.22) | 7.93E-01 | 9.41E-01 | 8.09E-01 | 9.98E-01 | 9.74E-01 | 9.27E-01 |
| Fumaric acid                  | 0.07(0.13)  | 0.05(0.14)  | 0.75(0.18)  | -0.02(0.19) | 0.68(0.22)  | 0.69(0.23)  | 9.24E-01 | 2.74E-03 | 3.27E-03 | 9.98E-01 | 7.92E-02 | 8.75E-02 |
| Galactonic acid               | 0.04(0.22)  | -0.03(0.17) | -0.34(0.13) | -0.08(0.28) | -0.38(0.26) | -0.31(0.21) | 7.86E-01 | 1.41E-01 | 1.56E-01 | 9.98E-01 | 3.78E-01 | 4.30E-01 |
| Galactose                     | -0.05(0.16) | -0.14(0.17) | -0.23(0.14) | -0.09(0.23) | -0.18(0.21) | -0.10(0.22) | 7.13E-01 | 3.93E-01 | 6.55E-01 | 9.98E-01 | 6.84E-01 | 8.12E-01 |
| Gluconic acid                 | -0.03(0.24) | 0.10(0.17)  | -0.37(0.13) | 0.12(0.30)  | -0.35(0.28) | -0.47(0.22) | 6.80E-01 | 2.13E-01 | 3.38E-02 | 9.98E-01 | 4.79E-01 | 2.34E-01 |
| Glucose                       | 0.09(0.15)  | -0.20(0.26) | -0.24(0.13) | -0.29(0.30) | -0.33(0.20) | -0.04(0.29) | 3.43E-01 | 1.01E-01 | 8.96E-01 | 9.98E-01 | 3.25E-01 | 9.63E-01 |
| Glutamic acid                 | -0.09(0.14) | -0.20(0.17) | -0.47(0.14) | -0.11(0.22) | -0.39(0.19) | -0.28(0.21) | 6.16E-01 | 4.63E-02 | 2.01E-01 | 9.98E-01 | 2.13E-01 | 4.66E-01 |
| Glutamine                     | 0.04(0.14)  | -0.07(0.16) | 0.29(0.20)  | -0.12(0.20) | 0.25(0.25)  | 0.36(0.26)  | 5.74E-01 | 3.22E-01 | 1.74E-01 | 9.98E-01 | 6.04E-01 | 4.42E-01 |
| Glyceric acid                 | 0.04(0.13)  | 0.10(0.17)  | 0.34(0.18)  | 0.06(0.21)  | 0.30(0.22)  | 0.24(0.25)  | 7.85E-01 | 1.81E-01 | 3.30E-01 | 9.98E-01 | 4.29E-01 | 5.81E-01 |
| Glycerol                      | 0.12(0.15)  | 0.09(0.15)  | 0.37(0.19)  | -0.04(0.20) | 0.24(0.23)  | 0.28(0.23)  | 8.49E-01 | 2.88E-01 | 2.21E-01 | 9.98E-01 | 5.80E-01 | 4.81E-01 |
| Glycerol-alpha-phosphate      | -0.10(0.15) | 0.08(0.15)  | -0.11(0.17) | 0.18(0.22)  | -0.01(0.23) | -0.18(0.23) | 4.23E-01 | 9.81E-01 | 4.34E-01 | 9.98E-01 | 9.92E-01 | 6.76E-01 |
| Glycine                       | 0.08(0.14)  | 0.00(0.20)  | 0.23(0.14)  | -0.08(0.25) | 0.15(0.21)  | 0.23(0.24)  | 7.60E-01 | 4.74E-01 | 3.51E-01 | 9.98E-01 | 7.26E-01 | 6.03E-01 |
| Glycolic acid                 | 0.06(0.12)  | 0.18(0.22)  | -0.24(0.22) | 0.12(0.25)  | -0.30(0.25) | -0.42(0.32) | 6.43E-01 | 2.44E-01 | 2.01E-01 | 9.98E-01 | 5.24E-01 | 4.66E-01 |
| Heptadecanoic acid            | -0.01(0.15) | -0.06(0.18) | 0.27(0.14)  | -0.06(0.24) | 0.28(0.21)  | 0.34(0.24)  | 8.14E-01 | 1.80E-01 | 1.60E-01 | 9.98E-01 | 4.29E-01 | 4.30E-01 |
| Hexitol                       | -0.01(0.16) | -0.08(0.12) | 0.26(0.24)  | -0.07(0.20) | 0.27(0.28)  | 0.34(0.27)  | 7.34E-01 | 3.39E-01 | 2.08E-01 | 9.98E-01 | 6.32E-01 | 4.70E-01 |
| Hexuronic acid                | -0.03(0.33) | 0.02(0.24)  | 0.03(0.12)  | 0.05(0.41)  | 0.06(0.34)  | 0.01(0.27)  | 9.00E-01 | 8.57E-01 | 9.68E-01 | 9.98E-01 | 9.48E-01 | 9.94E-01 |
| Hippuric acid                 | -0.16(0.31) | 0.07(0.10)  | 0.13(0.28)  | 0.23(0.33)  | 0.29(0.41)  | 0.06(0.30)  | 4.89E-01 | 4.87E-01 | 8.50E-01 | 9.98E-01 | 7.31E-01 | 9.34E-01 |
| Histidine                     | 0.03(0.14)  | -0.12(0.19) | -0.11(0.19) | -0.15(0.23) | -0.14(0.24) | 0.01(0.27)  | 5.19E-01 | 5.63E-01 | 9.80E-01 | 9.98E-01 | 7.98E-01 | 9.94E-01 |
| Hydrocinnamic acid            | 0.04(0.23)  | -0.17(0.12) | 0.62(0.37)  | -0.22(0.26) | 0.58(0.43)  | 0.80(0.38)  | 3.99E-01 | 1.81E-01 | 4.23E-02 | 9.98E-01 | 4.29E-01 | 2.41E-01 |
| Hydroxylamine                 | 0.02(0.14)  | 0.10(0.13)  | 0.83(0.19)  | 0.08(0.18)  | 0.81(0.23)  | 0.73(0.22)  | 6.58E-01 | 6.37E-04 | 1.70E-03 | 9.98E-01 | 3.43E-02 | 6.08E-02 |
| Hydroxyproline dipeptide NIST | -0.12(0.13) | 0.02(0.19)  | -0.01(0.20) | 0.14(0.23)  | 0.11(0.23)  | -0.03(0.27) | 5.34E-01 | 6.30E-01 | 9.14E-01 | 9.98E-01 | 8.45E-01 | 9.76E-01 |
| Hypoxanthine                  | -0.10(0.19) | -0.06(0.14) | 0.29(0.16)  | 0.05(0.24)  | 0.39(0.25)  | 0.34(0.22)  | 8.47E-01 | 1.27E-01 | 1.22E-01 | 9.98E-01 | 3.65E-01 | 3.78E-01 |
| Indole-3-acetate              | -0.13(0.16) | 0.07(0.14)  | 0.04(0.42)  | 0.20(0.22)  | 0.18(0.45)  | -0.02(0.44) | 3.59E-01 | 6.95E-01 | 9.57E-01 | 9.98E-01 | 8.88E-01 | 9.93E-01 |
| Indole-3-lactate              | -0.12(0.17) | 0.33(0.21)  | 0.05(0.12)  | 0.45(0.27)  | 0.17(0.21)  | -0.28(0.24) | 9.48E-02 | 4.15E-01 | 2.45E-01 | 9.98E-01 | 6.96E-01 | 5.11E-01 |

|                      |             |             |             |             |             |             |          |          |          |          |          |          |
|----------------------|-------------|-------------|-------------|-------------|-------------|-------------|----------|----------|----------|----------|----------|----------|
| Isocitric acid       | 0.02(0.13)  | 0.10(0.15)  | 0.35(0.26)  | 0.09(0.20)  | 0.33(0.28)  | 0.24(0.29)  | 6.62E-01 | 2.45E-01 | 4.06E-01 | 9.98E-01 | 5.24E-01 | 6.59E-01 |
| Isoleucine           | -0.09(0.20) | 0.19(0.15)  | -0.09(0.17) | 0.28(0.25)  | 0.00(0.26)  | -0.28(0.22) | 2.58E-01 | 9.92E-01 | 2.06E-01 | 9.98E-01 | 9.92E-01 | 4.69E-01 |
| Isothreitol          | -0.12(0.25) | 0.18(0.22)  | 0.05(0.11)  | 0.30(0.33)  | 0.17(0.27)  | -0.13(0.25) | 3.68E-01 | 5.17E-01 | 6.05E-01 | 9.98E-01 | 7.55E-01 | 8.02E-01 |
| Isothreonic acid     | 0.23(0.28)  | 0.21(0.21)  | -0.08(0.11) | -0.02(0.35) | -0.31(0.31) | -0.30(0.24) | 9.65E-01 | 3.11E-01 | 2.20E-01 | 9.98E-01 | 5.99E-01 | 4.81E-01 |
| Ketohexose           | 0.00(0.09)  | 0.34(0.65)  | -0.73(0.72) | 0.34(0.66)  | -0.73(0.73) | -1.07(0.97) | 6.05E-01 | 3.20E-01 | 2.73E-01 | 9.98E-01 | 6.04E-01 | 5.22E-01 |
| Kynurenine           | -0.06(0.11) | 0.14(0.28)  | -0.02(0.23) | 0.20(0.30)  | 0.04(0.25)  | -0.16(0.37) | 5.06E-01 | 8.66E-01 | 6.67E-01 | 9.98E-01 | 9.49E-01 | 8.17E-01 |
| Lactic acid          | 0.02(0.21)  | -0.03(0.24) | -0.29(0.11) | -0.05(0.33) | -0.31(0.24) | -0.26(0.26) | 8.81E-01 | 2.03E-01 | 3.20E-01 | 9.98E-01 | 4.69E-01 | 5.75E-01 |
| Lactulose            | -0.07(0.36) | 0.00(0.24)  | -0.18(0.11) | 0.08(0.43)  | -0.10(0.38) | -0.18(0.27) | 8.61E-01 | 7.85E-01 | 5.03E-01 | 9.98E-01 | 9.33E-01 | 7.26E-01 |
| Lauric acid          | 0.03(0.19)  | 0.03(0.14)  | 0.36(0.20)  | -0.00(0.24) | 0.33(0.28)  | 0.34(0.24)  | 9.94E-01 | 2.32E-01 | 1.70E-01 | 9.99E-01 | 5.11E-01 | 4.42E-01 |
| Leucine              | -0.04(0.19) | 0.17(0.15)  | 0.07(0.17)  | 0.21(0.23)  | 0.11(0.25)  | -0.10(0.22) | 3.64E-01 | 6.45E-01 | 6.55E-01 | 9.98E-01 | 8.47E-01 | 8.12E-01 |
| Levogluconan         | -0.04(0.27) | 0.02(0.15)  | 0.16(0.12)  | 0.07(0.31)  | 0.20(0.29)  | 0.14(0.20)  | 8.26E-01 | 4.90E-01 | 4.89E-01 | 9.98E-01 | 7.32E-01 | 7.17E-01 |
| Linoleic acid        | 0.12(0.18)  | -0.04(0.15) | 0.10(0.17)  | -0.16(0.23) | -0.02(0.24) | 0.14(0.23)  | 4.85E-01 | 9.41E-01 | 5.38E-01 | 9.98E-01 | 9.74E-01 | 7.57E-01 |
| Lysine               | -0.07(0.15) | 0.04(0.18)  | -0.22(0.19) | 0.11(0.24)  | -0.15(0.24) | -0.26(0.26) | 6.56E-01 | 5.26E-01 | 3.21E-01 | 9.98E-01 | 7.66E-01 | 5.75E-01 |
| Lyxitol              | 0.01(0.16)  | -0.12(0.19) | 0.05(0.15)  | -0.13(0.24) | 0.04(0.21)  | 0.17(0.24)  | 5.95E-01 | 8.44E-01 | 4.73E-01 | 9.98E-01 | 9.48E-01 | 7.13E-01 |
| Malic acid           | 0.08(0.37)  | 0.05(0.49)  | 0.08(0.10)  | -0.03(0.61) | 0.01(0.38)  | 0.04(0.50)  | 9.59E-01 | 9.87E-01 | 9.39E-01 | 9.98E-01 | 9.92E-01 | 9.84E-01 |
| Maltose              | -0.08(0.13) | 0.10(0.19)  | 0.30(0.17)  | 0.18(0.22)  | 0.38(0.21)  | 0.20(0.25)  | 4.17E-01 | 7.67E-02 | 4.34E-01 | 9.98E-01 | 2.92E-01 | 6.76E-01 |
| Maltotriose          | -0.02(0.18) | 0.17(0.13)  | 0.50(0.14)  | 0.19(0.21)  | 0.52(0.22)  | 0.33(0.19)  | 3.69E-01 | 2.06E-02 | 8.24E-02 | 9.98E-01 | 1.58E-01 | 3.20E-01 |
| Mannitol             | -0.09(0.27) | -1.13(0.42) | -0.03(0.10) | -1.04(0.49) | 0.05(0.29)  | 1.09(0.43)  | 3.80E-02 | 8.55E-01 | 1.37E-02 | 9.98E-01 | 9.48E-01 | 1.53E-01 |
| Mannose              | -0.01(0.18) | -0.02(0.19) | -0.31(0.14) | -0.01(0.25) | -0.30(0.22) | -0.28(0.23) | 9.57E-01 | 1.87E-01 | 2.27E-01 | 9.98E-01 | 4.37E-01 | 4.89E-01 |
| Methanolphosphate    | -0.03(0.13) | 0.00(0.17)  | -0.23(0.21) | 0.03(0.21)  | -0.20(0.24) | -0.23(0.27) | 9.00E-01 | 4.11E-01 | 4.08E-01 | 9.98E-01 | 6.91E-01 | 6.61E-01 |
| Methionine           | -0.05(0.17) | -0.01(0.19) | 0.19(0.38)  | 0.04(0.25)  | 0.24(0.42)  | 0.20(0.42)  | 8.88E-01 | 5.70E-01 | 6.36E-01 | 9.98E-01 | 7.99E-01 | 8.02E-01 |
| Methionine sulfoxide | 0.12(0.20)  | 0.02(0.15)  | 0.19(0.17)  | -0.10(0.22) | 0.06(0.26)  | 0.16(0.23)  | 6.53E-01 | 8.11E-01 | 4.72E-01 | 9.98E-01 | 9.44E-01 | 7.13E-01 |
| Myo-inositol         | 0.05(0.21)  | 0.03(0.21)  | -0.01(0.12) | -0.01(0.30) | -0.06(0.24) | -0.05(0.25) | 9.72E-01 | 8.15E-01 | 8.49E-01 | 9.98E-01 | 9.44E-01 | 9.34E-01 |
| Myristic acid        | 0.00(0.19)  | 0.02(0.13)  | 0.41(0.17)  | 0.02(0.23)  | 0.41(0.25)  | 0.38(0.21)  | 9.25E-01 | 1.10E-01 | 7.84E-02 | 9.98E-01 | 3.36E-01 | 3.08E-01 |
| N-acetylglutamate    | 0.01(0.17)  | 0.09(0.14)  | 0.21(0.19)  | 0.08(0.21)  | 0.20(0.26)  | 0.12(0.24)  | 6.95E-01 | 4.40E-01 | 6.27E-01 | 9.98E-01 | 7.15E-01 | 8.02E-01 |
| N-acetylglycine NIST | -0.01(0.15) | -0.04(0.15) | 0.32(0.16)  | -0.03(0.21) | 0.33(0.22)  | 0.36(0.22)  | 8.99E-01 | 1.39E-01 | 1.10E-01 | 9.98E-01 | 3.78E-01 | 3.59E-01 |
| N-acetylmannosamine  | -0.10(0.22) | -0.06(0.12) | -0.18(0.22) | 0.04(0.25)  | -0.09(0.30) | -0.13(0.25) | 8.75E-01 | 7.79E-01 | 6.13E-01 | 9.98E-01 | 9.33E-01 | 8.02E-01 |
| N-acetylnornithine   | -0.03(0.25) | 0.05(0.14)  | 0.03(0.18)  | 0.08(0.28)  | 0.06(0.30)  | -0.02(0.22) | 7.78E-01 | 8.47E-01 | 9.25E-01 | 9.98E-01 | 9.48E-01 | 9.79E-01 |
| Naproxen             | 0.07(0.13)  | 0.56(1.11)  | 0.04(0.12)  | 0.49(1.11)  | -0.03(0.18) | -0.52(1.12) | 6.60E-01 | 8.76E-01 | 6.43E-01 | 9.98E-01 | 9.55E-01 | 8.05E-01 |

|                           |             |             |             |             |             |             |          |          |          |          |          |          |
|---------------------------|-------------|-------------|-------------|-------------|-------------|-------------|----------|----------|----------|----------|----------|----------|
| Nicotinic acid            | 0.02(0.12)  | 0.13(0.14)  | 0.93(0.23)  | 0.11(0.18)  | 0.90(0.26)  | 0.80(0.27)  | 5.50E-01 | 7.76E-04 | 4.07E-03 | 9.98E-01 | 3.66E-02 | 9.59E-02 |
| N-methylalanine           | 0.06(0.14)  | -0.15(0.16) | 0.06(0.20)  | -0.21(0.21) | 0.00(0.24)  | 0.21(0.26)  | 3.38E-01 | 9.87E-01 | 4.17E-01 | 9.98E-01 | 9.92E-01 | 6.72E-01 |
| Nonadecanoic acid         | 0.09(0.11)  | -0.05(0.34) | 0.22(0.20)  | -0.14(0.35) | 0.13(0.23)  | 0.27(0.39)  | 6.87E-01 | 5.70E-01 | 4.91E-01 | 9.98E-01 | 7.99E-01 | 7.17E-01 |
| Oleic acid                | 0.10(0.21)  | -0.06(0.14) | 0.09(0.16)  | -0.17(0.25) | -0.01(0.26) | 0.16(0.21)  | 5.03E-01 | 9.67E-01 | 4.60E-01 | 9.98E-01 | 9.83E-01 | 7.06E-01 |
| Ornithine                 | -0.05(0.17) | 0.01(0.16)  | 0.11(0.15)  | 0.06(0.23)  | 0.17(0.22)  | 0.10(0.21)  | 7.91E-01 | 4.65E-01 | 6.30E-01 | 9.98E-01 | 7.24E-01 | 8.02E-01 |
| Oxalic acid               | 0.03(0.15)  | 0.10(0.13)  | 0.64(0.25)  | 0.07(0.19)  | 0.61(0.28)  | 0.54(0.28)  | 7.09E-01 | 3.29E-02 | 5.79E-02 | 9.98E-01 | 1.94E-01 | 2.80E-01 |
| Oxamic acid               | 0.00(0.17)  | 0.07(0.12)  | 0.45(0.22)  | 0.07(0.21)  | 0.45(0.27)  | 0.39(0.25)  | 7.48E-01 | 9.80E-02 | 1.25E-01 | 9.98E-01 | 3.24E-01 | 3.78E-01 |
| Oxoproline                | 0.02(0.16)  | 0.20(0.15)  | 0.46(0.13)  | 0.18(0.21)  | 0.45(0.20)  | 0.26(0.20)  | 3.89E-01 | 3.12E-02 | 1.95E-01 | 9.98E-01 | 1.87E-01 | 4.66E-01 |
| Palmitic acid             | -0.01(0.16) | -0.03(0.17) | 0.17(0.15)  | -0.01(0.24) | 0.18(0.22)  | 0.20(0.23)  | 9.56E-01 | 4.04E-01 | 4.05E-01 | 9.98E-01 | 6.89E-01 | 6.59E-01 |
| Palmitoleic acid          | 0.05(0.28)  | -0.06(0.13) | 0.16(0.17)  | -0.11(0.31) | 0.11(0.33)  | 0.22(0.21)  | 7.24E-01 | 7.36E-01 | 3.05E-01 | 9.98E-01 | 9.21E-01 | 5.64E-01 |
| Parabanic acid NIST       | 0.05(0.17)  | 0.06(0.12)  | 0.59(0.20)  | 0.01(0.20)  | 0.54(0.25)  | 0.53(0.23)  | 9.55E-01 | 3.57E-02 | 2.24E-02 | 9.98E-01 | 2.00E-01 | 1.92E-01 |
| Pelargonic acid           | -0.03(0.14) | -0.04(0.16) | 0.58(0.16)  | -0.01(0.21) | 0.61(0.21)  | 0.62(0.22)  | 9.79E-01 | 4.37E-03 | 6.35E-03 | 9.98E-01 | 7.92E-02 | 1.22E-01 |
| Pentadecanoic acid        | -0.12(0.17) | -0.22(0.19) | -0.17(0.13) | -0.09(0.26) | -0.05(0.22) | 0.04(0.23)  | 7.16E-01 | 8.16E-01 | 8.45E-01 | 9.98E-01 | 9.44E-01 | 9.34E-01 |
| Phenylalanine             | -0.09(0.16) | 0.15(0.17)  | 0.27(0.15)  | 0.24(0.23)  | 0.36(0.22)  | 0.12(0.22)  | 3.05E-01 | 1.05E-01 | 5.80E-01 | 9.98E-01 | 3.27E-01 | 7.88E-01 |
| Phenylethylamine          | 0.03(0.18)  | 0.05(0.16)  | 0.26(0.13)  | 0.02(0.24)  | 0.23(0.23)  | 0.21(0.21)  | 9.33E-01 | 3.04E-01 | 3.05E-01 | 9.98E-01 | 5.95E-01 | 5.64E-01 |
| Phosphate                 | 0.08(0.13)  | 0.04(0.15)  | 0.45(0.19)  | -0.03(0.20) | 0.38(0.23)  | 0.41(0.24)  | 8.69E-01 | 1.01E-01 | 8.68E-02 | 9.98E-01 | 3.25E-01 | 3.21E-01 |
| Phosphoethanolamine       | -0.02(0.13) | 0.09(0.15)  | 0.67(0.17)  | 0.11(0.19)  | 0.69(0.20)  | 0.58(0.22)  | 5.51E-01 | 1.16E-03 | 1.04E-02 | 9.98E-01 | 4.84E-02 | 1.37E-01 |
| Pinitol                   | 0.02(0.22)  | 0.06(0.35)  | 0.98(0.43)  | 0.04(0.41)  | 0.96(0.48)  | 0.92(0.56)  | 9.28E-01 | 5.17E-02 | 1.05E-01 | 9.98E-01 | 2.26E-01 | 3.56E-01 |
| Pipecolic acid            | -0.11(0.21) | 0.01(0.18)  | -0.01(0.12) | 0.11(0.28)  | 0.10(0.24)  | -0.01(0.22) | 6.88E-01 | 6.85E-01 | 9.48E-01 | 9.98E-01 | 8.82E-01 | 9.90E-01 |
| Proline                   | 0.02(0.18)  | -0.02(0.15) | 0.19(0.17)  | -0.04(0.23) | 0.18(0.24)  | 0.21(0.22)  | 8.72E-01 | 4.74E-01 | 3.50E-01 | 9.98E-01 | 7.26E-01 | 6.03E-01 |
| Pseudo uridine            | -0.02(0.18) | 0.15(0.17)  | 0.18(0.13)  | 0.16(0.25)  | 0.20(0.23)  | 0.03(0.22)  | 5.20E-01 | 3.90E-01 | 8.79E-01 | 9.98E-01 | 6.84E-01 | 9.50E-01 |
| Pyrophosphate             | -0.02(2.76) | -0.01(0.08) | 9.58(2.31)  | -0.00(2.77) | 9.59(3.65)  | 9.59(2.31)  | 9.99E-01 | 1.08E-02 | 1.00E-04 | 9.99E-01 | 1.10E-01 | 1.26E-02 |
| Pyrrole-2-carboxylic acid | 0.00(0.14)  | 0.15(0.14)  | 0.63(0.21)  | 0.15(0.19)  | 0.63(0.25)  | 0.48(0.25)  | 4.45E-01 | 1.36E-02 | 5.65E-02 | 9.98E-01 | 1.22E-01 | 2.77E-01 |
| Pyruvic acid              | 0.16(0.17)  | 0.13(0.16)  | -0.20(0.14) | -0.03(0.23) | -0.36(0.22) | -0.33(0.22) | 8.95E-01 | 1.15E-01 | 1.39E-01 | 9.98E-01 | 3.42E-01 | 4.04E-01 |
| Quinic acid               | -0.07(0.16) | 0.02(0.13)  | 0.62(0.18)  | 0.08(0.21)  | 0.69(0.24)  | 0.61(0.23)  | 6.98E-01 | 5.36E-03 | 9.19E-03 | 9.98E-01 | 8.78E-02 | 1.37E-01 |
| Ribonic acid              | -0.13(0.38) | 0.01(0.16)  | 0.17(0.16)  | 0.15(0.41)  | 0.30(0.41)  | 0.16(0.22)  | 7.20E-01 | 4.61E-01 | 4.82E-01 | 9.98E-01 | 7.24E-01 | 7.15E-01 |
| Salicylic acid            | -0.05(0.45) | 0.02(0.10)  | -0.45(1.41) | 0.07(0.46)  | -0.40(1.47) | -0.47(1.41) | 8.86E-01 | 7.87E-01 | 7.43E-01 | 9.98E-01 | 9.33E-01 | 8.75E-01 |
| Serine                    | 0.12(0.14)  | 0.16(0.17)  | 0.30(0.16)  | 0.04(0.23)  | 0.18(0.21)  | 0.14(0.23)  | 8.48E-01 | 3.83E-01 | 5.50E-01 | 9.98E-01 | 6.83E-01 | 7.63E-01 |

|                        |             |             |             |             |             |             |          |          |          |          |          |          |
|------------------------|-------------|-------------|-------------|-------------|-------------|-------------|----------|----------|----------|----------|----------|----------|
| Shikimic acid          | 0.05(0.14)  | -0.26(0.12) | 0.89(0.41)  | -0.31(0.18) | 0.84(0.45)  | 1.15(0.43)  | 8.84E-02 | 6.61E-02 | 1.05E-02 | 9.98E-01 | 2.77E-01 | 1.37E-01 |
| Sorbitol               | 0.11(0.31)  | 0.71(3.29)  | 0.01(0.10)  | 0.60(3.30)  | -0.10(0.33) | -0.70(3.29) | 8.57E-01 | 7.55E-01 | 8.32E-01 | 9.98E-01 | 9.24E-01 | 9.34E-01 |
| Stearic acid           | -0.07(0.15) | -0.01(0.19) | 0.24(0.15)  | 0.06(0.24)  | 0.30(0.21)  | 0.25(0.24)  | 8.16E-01 | 1.59E-01 | 3.09E-01 | 9.98E-01 | 4.02E-01 | 5.69E-01 |
| Succinic acid          | 0.02(0.13)  | 0.29(0.21)  | 0.03(0.16)  | 0.27(0.25)  | 0.01(0.20)  | -0.26(0.26) | 2.77E-01 | 9.65E-01 | 3.20E-01 | 9.98E-01 | 9.83E-01 | 5.75E-01 |
| Sucrose                | -0.48(2.06) | 0.10(0.21)  | -0.01(0.10) | 0.58(2.08)  | 0.47(2.06)  | -0.11(0.23) | 7.80E-01 | 8.21E-01 | 6.30E-01 | 9.98E-01 | 9.44E-01 | 8.02E-01 |
| Tagatose               | -0.11(0.31) | -0.09(0.31) | 0.05(0.12)  | 0.02(0.44)  | 0.16(0.33)  | 0.14(0.33)  | 9.57E-01 | 6.27E-01 | 6.79E-01 | 9.98E-01 | 8.45E-01 | 8.21E-01 |
| Taurine                | 0.01(0.21)  | 0.03(0.15)  | -0.02(0.15) | 0.02(0.25)  | -0.03(0.25) | -0.05(0.21) | 9.24E-01 | 9.21E-01 | 8.14E-01 | 9.98E-01 | 9.72E-01 | 9.27E-01 |
| Threonic acid          | 0.04(0.23)  | 0.00(0.13)  | 0.19(0.18)  | -0.04(0.26) | 0.15(0.28)  | 0.19(0.22)  | 8.69E-01 | 6.05E-01 | 3.95E-01 | 9.98E-01 | 8.27E-01 | 6.55E-01 |
| Threonine              | 0.07(0.15)  | 0.10(0.16)  | 0.35(0.17)  | 0.03(0.21)  | 0.28(0.23)  | 0.25(0.23)  | 9.04E-01 | 2.29E-01 | 2.87E-01 | 9.98E-01 | 5.11E-01 | 5.44E-01 |
| Tocopherol alpha-      | -0.08(0.16) | 0.05(0.15)  | -0.37(0.25) | 0.13(0.21)  | -0.29(0.28) | -0.42(0.29) | 5.60E-01 | 3.04E-01 | 1.49E-01 | 9.98E-01 | 5.95E-01 | 4.26E-01 |
| Tocopherol gamma-      | 0.04(0.17)  | 0.09(0.15)  | 0.29(0.20)  | 0.05(0.22)  | 0.25(0.25)  | 0.20(0.25)  | 8.14E-01 | 3.22E-01 | 4.21E-01 | 9.98E-01 | 6.04E-01 | 6.75E-01 |
| Trans-4-hydroxyproline | -0.05(0.19) | -0.10(0.18) | 0.08(0.13)  | -0.05(0.27) | 0.13(0.23)  | 0.18(0.23)  | 8.41E-01 | 5.91E-01 | 4.32E-01 | 9.98E-01 | 8.10E-01 | 6.76E-01 |
| Tryptophan             | -0.09(0.16) | -0.06(0.16) | -0.45(0.19) | 0.03(0.22)  | -0.36(0.24) | -0.39(0.25) | 9.05E-01 | 1.39E-01 | 1.20E-01 | 9.98E-01 | 3.78E-01 | 3.78E-01 |
| Tyrosine               | -0.04(0.18) | 0.08(0.19)  | 0.09(0.13)  | 0.12(0.26)  | 0.13(0.22)  | 0.01(0.23)  | 6.41E-01 | 5.74E-01 | 9.79E-01 | 9.98E-01 | 8.01E-01 | 9.94E-01 |
| UDP GlcNAc             | 0.01(0.12)  | -0.15(0.17) | 0.53(0.19)  | -0.16(0.21) | 0.52(0.23)  | 0.68(0.26)  | 4.40E-01 | 2.37E-02 | 1.09E-02 | 9.98E-01 | 1.63E-01 | 1.37E-01 |
| UDP-glucuronic acid    | -0.12(0.50) | 0.14(0.27)  | 0.29(0.09)  | 0.26(0.58)  | 0.40(0.51)  | 0.15(0.29)  | 6.56E-01 | 4.34E-01 | 6.11E-01 | 9.98E-01 | 7.11E-01 | 8.02E-01 |
| Urea                   | 0.01(0.20)  | 0.03(0.12)  | 0.22(0.18)  | 0.02(0.24)  | 0.21(0.27)  | 0.18(0.21)  | 9.20E-01 | 4.41E-01 | 3.96E-01 | 9.98E-01 | 7.15E-01 | 6.55E-01 |
| Uric acid              | -0.07(0.18) | 0.16(0.20)  | 0.16(0.15)  | 0.24(0.26)  | 0.24(0.23)  | 0.00(0.25)  | 3.68E-01 | 3.05E-01 | 9.94E-01 | 9.98E-01 | 5.95E-01 | 9.94E-01 |
| Uridine                | -0.01(0.12) | 0.26(0.22)  | -0.14(0.25) | 0.26(0.25)  | -0.13(0.28) | -0.39(0.34) | 2.95E-01 | 6.39E-01 | 2.45E-01 | 9.98E-01 | 8.46E-01 | 5.11E-01 |
| Valine                 | -0.07(0.17) | 0.18(0.15)  | -0.03(0.18) | 0.26(0.23)  | 0.04(0.25)  | -0.22(0.23) | 2.68E-01 | 8.71E-01 | 3.55E-01 | 9.98E-01 | 9.52E-01 | 6.03E-01 |
| Xylitol                | -0.03(0.15) | 0.06(0.13)  | 0.59(0.22)  | 0.09(0.19)  | 0.62(0.26)  | 0.53(0.24)  | 6.43E-01 | 2.10E-02 | 3.42E-02 | 9.98E-01 | 1.58E-01 | 2.34E-01 |
| Xylose                 | 0.04(0.40)  | 0.27(0.20)  | -0.10(0.16) | 0.23(0.45)  | -0.14(0.44) | -0.37(0.26) | 6.13E-01 | 7.49E-01 | 1.62E-01 | 9.98E-01 | 9.23E-01 | 4.30E-01 |
| <b>Unknown</b>         |             |             |             |             |             |             |          |          |          |          |          |          |
| 87756                  | 0.03(0.10)  | 0.10(0.15)  | 1.12(0.22)  | 0.06(0.18)  | 1.09(0.25)  | 1.02(0.27)  | 7.31E-01 | 3.99E-05 | 3.26E-04 | 9.98E-01 | 7.52E-03 | 1.83E-02 |
| 106634                 | 0.04(0.11)  | 0.08(0.14)  | 1.30(0.30)  | 0.04(0.18)  | 1.26(0.31)  | 1.22(0.32)  | 8.24E-01 | 1.34E-04 | 3.40E-04 | 9.98E-01 | 1.27E-02 | 1.83E-02 |
| 109387                 | 0.02(0.12)  | 0.09(0.17)  | -0.70(0.13) | 0.07(0.20)  | -0.72(0.18) | -0.79(0.21) | 7.14E-01 | 1.41E-04 | 3.36E-04 | 9.98E-01 | 1.27E-02 | 1.83E-02 |
| 135869                 | 0.12(0.13)  | -0.40(0.29) | -0.61(0.12) | -0.52(0.32) | -0.73(0.18) | -0.21(0.32) | 1.10E-01 | 1.69E-04 | 5.18E-01 | 9.98E-01 | 1.27E-02 | 7.40E-01 |
| 14509                  | 0.03(0.12)  | 0.10(0.14)  | 1.07(0.26)  | 0.07(0.18)  | 1.04(0.29)  | 0.97(0.30)  | 7.14E-01 | 5.82E-04 | 1.70E-03 | 9.98E-01 | 3.43E-02 | 6.08E-02 |

|        |             |             |             |             |             |             |          |          |          |          |          |          |
|--------|-------------|-------------|-------------|-------------|-------------|-------------|----------|----------|----------|----------|----------|----------|
| 17651  | -0.05(0.13) | -0.09(0.16) | 0.61(0.18)  | -0.04(0.22) | 0.66(0.21)  | 0.69(0.24)  | 8.73E-01 | 2.46E-03 | 5.71E-03 | 9.98E-01 | 7.92E-02 | 1.20E-01 |
| 4976   | 0.03(0.10)  | 0.19(0.23)  | 0.90(0.26)  | 0.16(0.25)  | 0.87(0.28)  | 0.71(0.34)  | 5.10E-01 | 2.55E-03 | 4.10E-02 | 9.98E-01 | 7.92E-02 | 2.41E-01 |
| 5900   | 0.02(0.15)  | 0.14(0.12)  | 0.79(0.21)  | 0.12(0.18)  | 0.77(0.25)  | 0.65(0.24)  | 5.14E-01 | 2.65E-03 | 7.81E-03 | 9.98E-01 | 7.92E-02 | 1.28E-01 |
| 448    | -0.01(0.13) | 0.13(0.13)  | 0.83(0.25)  | 0.14(0.18)  | 0.84(0.28)  | 0.70(0.28)  | 4.41E-01 | 3.46E-03 | 1.39E-02 | 9.98E-01 | 7.92E-02 | 1.53E-01 |
| 134336 | 0.03(0.12)  | 0.21(0.19)  | 0.60(0.15)  | 0.17(0.22)  | 0.57(0.19)  | 0.39(0.24)  | 4.25E-01 | 3.69E-03 | 1.00E-01 | 9.98E-01 | 7.92E-02 | 3.50E-01 |
| 16550  | 0.03(0.12)  | 0.15(0.15)  | 0.91(0.27)  | 0.12(0.19)  | 0.88(0.29)  | 0.75(0.31)  | 5.21E-01 | 3.81E-03 | 1.62E-02 | 9.98E-01 | 7.92E-02 | 1.65E-01 |
| 17537  | -0.05(0.15) | 0.19(0.13)  | 0.65(0.18)  | 0.24(0.19)  | 0.70(0.23)  | 0.46(0.22)  | 2.14E-01 | 4.10E-03 | 4.26E-02 | 9.98E-01 | 7.92E-02 | 2.41E-01 |
| 145494 | -0.06(0.16) | 0.15(0.11)  | 0.81(0.25)  | 0.22(0.19)  | 0.88(0.30)  | 0.66(0.27)  | 2.70E-01 | 4.16E-03 | 1.80E-02 | 9.98E-01 | 7.92E-02 | 1.75E-01 |
| 64546  | 0.09(0.14)  | 0.03(0.26)  | -0.46(0.12) | -0.07(0.30) | -0.56(0.19) | -0.49(0.28) | 8.25E-01 | 4.17E-03 | 8.73E-02 | 9.98E-01 | 7.92E-02 | 3.21E-01 |
| 6646   | 0.14(0.15)  | -0.48(0.34) | -0.40(0.12) | -0.62(0.37) | -0.55(0.19) | 0.08(0.37)  | 9.85E-02 | 6.51E-03 | 8.36E-01 | 9.98E-01 | 9.44E-02 | 9.34E-01 |
| 13107  | 0.03(0.15)  | 0.15(0.13)  | 0.77(0.23)  | 0.13(0.19)  | 0.74(0.26)  | 0.61(0.26)  | 5.07E-01 | 6.52E-03 | 2.02E-02 | 9.98E-01 | 9.44E-02 | 1.81E-01 |
| 41689  | 0.00(0.12)  | -0.02(0.29) | -0.59(0.18) | -0.03(0.31) | -0.59(0.21) | -0.56(0.34) | 9.33E-01 | 6.98E-03 | 9.94E-02 | 9.98E-01 | 9.44E-02 | 3.50E-01 |
| 2039   | -0.11(0.14) | -0.17(0.16) | 0.51(0.17)  | -0.06(0.21) | 0.62(0.22)  | 0.68(0.22)  | 7.77E-01 | 7.01E-03 | 3.48E-03 | 9.98E-01 | 9.44E-02 | 8.75E-02 |
| 135610 | 0.25(0.16)  | -0.11(0.23) | -0.31(0.13) | -0.36(0.28) | -0.56(0.20) | -0.20(0.26) | 2.04E-01 | 7.28E-03 | 4.44E-01 | 9.98E-01 | 9.47E-02 | 6.89E-01 |
| 120562 | 0.01(0.15)  | 0.16(0.13)  | 0.66(0.20)  | 0.15(0.19)  | 0.65(0.24)  | 0.50(0.23)  | 4.48E-01 | 8.86E-03 | 3.38E-02 | 9.98E-01 | 1.04E-01 | 2.34E-01 |
| 7718   | 0.01(0.10)  | -0.09(0.24) | 1.06(0.38)  | -0.10(0.26) | 1.04(0.39)  | 1.15(0.45)  | 6.86E-01 | 9.90E-03 | 1.27E-02 | 9.98E-01 | 1.10E-01 | 1.53E-01 |
| 473    | -0.04(0.16) | 0.11(0.12)  | 0.71(0.24)  | 0.15(0.20)  | 0.75(0.28)  | 0.60(0.26)  | 4.47E-01 | 1.04E-02 | 2.74E-02 | 9.98E-01 | 1.10E-01 | 2.20E-01 |
| 132379 | -0.10(0.16) | 0.09(0.16)  | 0.49(0.16)  | 0.19(0.22)  | 0.59(0.22)  | 0.40(0.23)  | 3.92E-01 | 1.06E-02 | 8.41E-02 | 9.98E-01 | 1.10E-01 | 3.20E-01 |
| 479    | 0.01(0.16)  | 0.15(0.13)  | 0.64(0.19)  | 0.14(0.20)  | 0.63(0.24)  | 0.49(0.23)  | 4.79E-01 | 1.06E-02 | 3.54E-02 | 9.98E-01 | 1.10E-01 | 2.34E-01 |
| 107960 | 0.00(0.17)  | 0.06(0.12)  | 0.72(0.22)  | 0.07(0.20)  | 0.72(0.28)  | 0.65(0.25)  | 7.34E-01 | 1.12E-02 | 1.03E-02 | 9.98E-01 | 1.11E-01 | 1.37E-01 |
| 17263  | -0.03(0.14) | 0.17(0.15)  | 0.72(0.26)  | 0.19(0.20)  | 0.74(0.29)  | 0.55(0.30)  | 3.31E-01 | 1.17E-02 | 6.93E-02 | 9.98E-01 | 1.11E-01 | 2.95E-01 |
| 41683  | 0.15(0.15)  | -0.16(0.35) | -0.36(0.13) | -0.32(0.38) | -0.51(0.20) | -0.20(0.37) | 4.05E-01 | 1.28E-02 | 6.01E-01 | 9.98E-01 | 1.18E-01 | 8.02E-01 |
| 121890 | -0.03(0.09) | 0.05(0.59)  | 1.40(0.57)  | 0.08(0.59)  | 1.43(0.58)  | 1.35(0.83)  | 8.91E-01 | 1.55E-02 | 1.08E-01 | 9.98E-01 | 1.36E-01 | 3.59E-01 |
| 3258   | 0.00(0.11)  | 0.17(0.19)  | 0.68(0.25)  | 0.17(0.22)  | 0.68(0.27)  | 0.50(0.31)  | 4.32E-01 | 1.61E-02 | 1.08E-01 | 9.98E-01 | 1.38E-01 | 3.59E-01 |
| 1872   | 0.04(0.13)  | 0.14(0.18)  | 0.51(0.15)  | 0.09(0.21)  | 0.47(0.19)  | 0.38(0.22)  | 6.72E-01 | 1.77E-02 | 9.55E-02 | 9.98E-01 | 1.48E-01 | 3.40E-01 |
| 47     | 0.11(0.15)  | 0.01(0.16)  | 0.56(0.13)  | -0.10(0.21) | 0.46(0.19)  | 0.56(0.20)  | 6.29E-01 | 1.94E-02 | 6.79E-03 | 9.98E-01 | 1.56E-01 | 1.22E-01 |
| 490    | -0.01(0.15) | 0.07(0.13)  | 0.64(0.23)  | 0.08(0.19)  | 0.65(0.27)  | 0.57(0.26)  | 6.61E-01 | 1.94E-02 | 3.44E-02 | 9.98E-01 | 1.56E-01 | 2.34E-01 |
| 5346   | -0.07(0.13) | 0.11(0.19)  | 0.41(0.15)  | 0.18(0.23)  | 0.47(0.20)  | 0.29(0.24)  | 4.29E-01 | 2.14E-02 | 2.19E-01 | 9.98E-01 | 1.58E-01 | 4.81E-01 |
| 1878   | 0.03(0.13)  | 0.14(0.16)  | 0.53(0.18)  | 0.12(0.20)  | 0.51(0.22)  | 0.39(0.24)  | 5.56E-01 | 2.34E-02 | 1.05E-01 | 9.98E-01 | 1.63E-01 | 3.56E-01 |

|        |             |             |             |             |             |             |          |          |          |          |          |          |
|--------|-------------|-------------|-------------|-------------|-------------|-------------|----------|----------|----------|----------|----------|----------|
| 4937   | -0.05(0.14) | 0.11(0.14)  | 0.63(0.27)  | 0.16(0.20)  | 0.69(0.30)  | 0.53(0.31)  | 4.29E-01 | 2.35E-02 | 8.86E-02 | 9.98E-01 | 1.63E-01 | 3.21E-01 |
| 6864   | -0.01(0.17) | 0.09(0.12)  | 0.64(0.24)  | 0.10(0.20)  | 0.65(0.29)  | 0.54(0.27)  | 6.09E-01 | 2.66E-02 | 4.72E-02 | 9.98E-01 | 1.76E-01 | 2.48E-01 |
| 1700   | -0.15(0.28) | 0.06(0.10)  | 1.19(0.52)  | 0.21(0.30)  | 1.34(0.59)  | 1.13(0.53)  | 4.81E-01 | 2.73E-02 | 3.78E-02 | 9.98E-01 | 1.76E-01 | 2.38E-01 |
| 4943   | 0.00(0.16)  | 0.07(0.12)  | 0.63(0.24)  | 0.08(0.19)  | 0.64(0.28)  | 0.56(0.26)  | 6.92E-01 | 2.85E-02 | 3.88E-02 | 9.98E-01 | 1.79E-01 | 2.38E-01 |
| 117141 | 0.04(0.15)  | 0.04(0.16)  | 0.50(0.13)  | -0.00(0.22) | 0.46(0.21)  | 0.45(0.20)  | 9.96E-01 | 3.03E-02 | 2.68E-02 | 9.99E-01 | 1.87E-01 | 2.20E-01 |
| 9392   | -0.01(0.15) | -0.06(0.18) | -0.53(0.18) | -0.05(0.22) | -0.52(0.24) | -0.47(0.26) | 8.26E-01 | 3.07E-02 | 7.10E-02 | 9.98E-01 | 1.87E-01 | 2.97E-01 |
| 1996   | -0.01(0.17) | 0.10(0.14)  | 0.48(0.15)  | 0.11(0.22)  | 0.48(0.22)  | 0.38(0.20)  | 6.26E-01 | 3.51E-02 | 6.95E-02 | 9.98E-01 | 2.00E-01 | 2.95E-01 |
| 3286   | -0.01(0.15) | 0.11(0.13)  | 0.71(0.32)  | 0.12(0.19)  | 0.73(0.34)  | 0.60(0.34)  | 5.19E-01 | 3.66E-02 | 7.74E-02 | 9.98E-01 | 2.00E-01 | 3.08E-01 |
| 87769  | -0.08(0.14) | 0.11(0.14)  | 0.48(0.22)  | 0.19(0.20)  | 0.56(0.26)  | 0.38(0.26)  | 3.47E-01 | 3.75E-02 | 1.57E-01 | 9.98E-01 | 2.00E-01 | 4.30E-01 |
| 4936   | -0.05(0.14) | 0.14(0.15)  | 1.97(0.95)  | 0.19(0.20)  | 2.01(0.95)  | 1.83(0.95)  | 3.61E-01 | 3.82E-02 | 5.88E-02 | 9.98E-01 | 2.00E-01 | 2.80E-01 |
| 5288   | 0.07(0.16)  | 0.11(0.12)  | 0.65(0.23)  | 0.03(0.20)  | 0.57(0.27)  | 0.54(0.25)  | 8.66E-01 | 3.86E-02 | 3.75E-02 | 9.98E-01 | 2.00E-01 | 2.38E-01 |
| 122151 | 0.01(0.15)  | 0.14(0.15)  | 0.52(0.20)  | 0.13(0.20)  | 0.51(0.24)  | 0.37(0.24)  | 5.10E-01 | 3.90E-02 | 1.27E-01 | 9.98E-01 | 2.00E-01 | 3.79E-01 |
| 131620 | 0.10(0.14)  | -0.10(0.13) | 0.56(0.17)  | -0.19(0.20) | 0.46(0.22)  | 0.65(0.21)  | 3.31E-01 | 3.90E-02 | 3.34E-03 | 9.98E-01 | 2.00E-01 | 8.75E-02 |
| 62     | 0.07(0.15)  | -0.08(0.16) | 0.49(0.12)  | -0.15(0.22) | 0.42(0.20)  | 0.57(0.20)  | 4.99E-01 | 3.97E-02 | 6.71E-03 | 9.98E-01 | 2.00E-01 | 1.22E-01 |
| 41691  | 0.04(0.17)  | 0.09(0.12)  | 0.57(0.19)  | 0.05(0.21)  | 0.53(0.25)  | 0.48(0.22)  | 8.03E-01 | 4.00E-02 | 3.49E-02 | 9.98E-01 | 2.00E-01 | 2.34E-01 |
| 41697  | 0.00(0.17)  | 0.09(0.12)  | 0.59(0.24)  | 0.09(0.20)  | 0.59(0.28)  | 0.50(0.27)  | 6.57E-01 | 4.02E-02 | 6.39E-02 | 9.98E-01 | 2.00E-01 | 2.87E-01 |
| 120526 | 0.02(0.15)  | 0.14(0.15)  | 0.52(0.20)  | 0.12(0.20)  | 0.50(0.24)  | 0.38(0.24)  | 5.48E-01 | 4.04E-02 | 1.25E-01 | 9.98E-01 | 2.00E-01 | 3.78E-01 |
| 135260 | 0.03(0.14)  | 0.17(0.18)  | 0.44(0.14)  | 0.14(0.22)  | 0.41(0.20)  | 0.27(0.22)  | 5.20E-01 | 4.09E-02 | 2.36E-01 | 9.98E-01 | 2.00E-01 | 5.03E-01 |
| 93947  | -0.12(0.23) | 0.05(0.11)  | 0.48(0.18)  | 0.17(0.25)  | 0.60(0.29)  | 0.43(0.21)  | 5.02E-01 | 4.24E-02 | 4.52E-02 | 9.98E-01 | 2.05E-01 | 2.47E-01 |
| 5482   | 0.01(0.19)  | 0.09(0.11)  | 0.65(0.27)  | 0.08(0.21)  | 0.65(0.31)  | 0.56(0.28)  | 6.94E-01 | 4.30E-02 | 5.30E-02 | 9.98E-01 | 2.05E-01 | 2.66E-01 |
| 3029   | -0.04(0.09) | 0.15(0.49)  | -2.03(0.98) | 0.18(0.50)  | -2.00(0.99) | -2.18(1.09) | 7.19E-01 | 4.69E-02 | 4.90E-02 | 9.98E-01 | 2.13E-01 | 2.53E-01 |
| 139467 | 0.04(0.19)  | 0.08(0.12)  | 0.58(0.21)  | 0.05(0.22)  | 0.55(0.27)  | 0.50(0.24)  | 8.32E-01 | 4.90E-02 | 4.23E-02 | 9.98E-01 | 2.20E-01 | 2.41E-01 |
| 46292  | 0.00(0.19)  | 0.05(0.13)  | 0.53(0.20)  | 0.05(0.23)  | 0.53(0.26)  | 0.47(0.23)  | 8.12E-01 | 5.00E-02 | 4.59E-02 | 9.98E-01 | 2.22E-01 | 2.47E-01 |
| 3232   | -0.06(0.14) | 0.05(0.17)  | 0.34(0.16)  | 0.12(0.21)  | 0.41(0.21)  | 0.29(0.22)  | 5.92E-01 | 5.37E-02 | 1.96E-01 | 9.98E-01 | 2.33E-01 | 4.66E-01 |
| 4932   | 0.07(0.17)  | -0.12(0.14) | -0.35(0.14) | -0.19(0.22) | -0.42(0.23) | -0.23(0.20) | 3.98E-01 | 6.57E-02 | 2.56E-01 | 9.98E-01 | 2.77E-01 | 5.17E-01 |
| 93385  | 0.01(0.20)  | 0.09(0.14)  | 0.45(0.14)  | 0.08(0.24)  | 0.44(0.24)  | 0.36(0.20)  | 7.35E-01 | 6.81E-02 | 7.51E-02 | 9.98E-01 | 2.81E-01 | 3.08E-01 |
| 6579   | -0.01(0.12) | 0.12(0.16)  | 0.77(0.41)  | 0.13(0.19)  | 0.78(0.42)  | 0.65(0.44)  | 4.93E-01 | 6.87E-02 | 1.41E-01 | 9.98E-01 | 2.81E-01 | 4.05E-01 |
| 146957 | 0.08(0.15)  | -0.06(0.13) | 0.50(0.17)  | -0.15(0.20) | 0.41(0.22)  | 0.56(0.21)  | 4.60E-01 | 6.93E-02 | 9.60E-03 | 9.98E-01 | 2.81E-01 | 1.37E-01 |
| 112487 | 0.02(0.14)  | 0.26(0.19)  | 0.39(0.13)  | 0.24(0.24)  | 0.37(0.20)  | 0.13(0.23)  | 3.22E-01 | 7.02E-02 | 5.78E-01 | 9.98E-01 | 2.81E-01 | 7.88E-01 |

|        |             |             |             |             |             |             |          |          |          |          |          |          |
|--------|-------------|-------------|-------------|-------------|-------------|-------------|----------|----------|----------|----------|----------|----------|
| 16561  | 0.04(0.15)  | 0.13(0.13)  | 0.60(0.28)  | 0.08(0.19)  | 0.56(0.31)  | 0.48(0.31)  | 6.62E-01 | 7.09E-02 | 1.24E-01 | 9.98E-01 | 2.81E-01 | 3.78E-01 |
| 42357  | -0.03(0.11) | 0.07(0.22)  | 0.52(0.28)  | 0.11(0.24)  | 0.55(0.30)  | 0.44(0.36)  | 6.52E-01 | 7.25E-02 | 2.20E-01 | 9.98E-01 | 2.85E-01 | 4.81E-01 |
| 17453  | -0.05(0.13) | 0.15(0.18)  | 0.33(0.17)  | 0.20(0.22)  | 0.38(0.21)  | 0.18(0.25)  | 3.60E-01 | 7.57E-02 | 4.71E-01 | 9.98E-01 | 2.92E-01 | 7.13E-01 |
| 4863   | -0.06(0.13) | -0.01(0.23) | 0.29(0.14)  | 0.05(0.27)  | 0.35(0.19)  | 0.30(0.27)  | 8.53E-01 | 7.64E-02 | 2.69E-01 | 9.98E-01 | 2.92E-01 | 5.22E-01 |
| 1709   | 0.00(0.14)  | 0.02(0.18)  | 0.36(0.16)  | 0.03(0.23)  | 0.37(0.20)  | 0.34(0.24)  | 9.05E-01 | 7.78E-02 | 1.56E-01 | 9.98E-01 | 2.92E-01 | 4.30E-01 |
| 4927   | -0.05(0.13) | 0.19(0.18)  | -2.80(1.56) | 0.24(0.22)  | -2.75(1.56) | -3.00(1.56) | 2.72E-01 | 8.28E-02 | 5.94E-02 | 9.98E-01 | 2.99E-01 | 2.80E-01 |
| 4945   | -0.07(0.16) | 0.02(0.13)  | 0.36(0.19)  | 0.08(0.21)  | 0.42(0.24)  | 0.34(0.23)  | 6.84E-01 | 8.37E-02 | 1.53E-01 | 9.98E-01 | 2.99E-01 | 4.29E-01 |
| 130396 | -0.02(0.18) | 0.03(0.13)  | 0.41(0.18)  | 0.05(0.21)  | 0.43(0.25)  | 0.38(0.22)  | 8.05E-01 | 8.40E-02 | 8.76E-02 | 9.98E-01 | 2.99E-01 | 3.21E-01 |
| 61     | -0.08(0.18) | 0.28(0.25)  | 0.29(0.11)  | 0.36(0.31)  | 0.37(0.21)  | 0.01(0.28)  | 2.54E-01 | 8.53E-02 | 9.65E-01 | 9.98E-01 | 2.99E-01 | 9.94E-01 |
| 4942   | -0.08(0.17) | 0.07(0.12)  | 0.44(0.25)  | 0.15(0.20)  | 0.51(0.29)  | 0.36(0.27)  | 4.57E-01 | 8.56E-02 | 1.89E-01 | 9.98E-01 | 2.99E-01 | 4.63E-01 |
| 134    | 0.07(0.12)  | -0.04(0.19) | -0.36(0.22) | -0.11(0.22) | -0.43(0.25) | -0.32(0.28) | 6.17E-01 | 8.77E-02 | 2.64E-01 | 9.98E-01 | 3.03E-01 | 5.22E-01 |
| 592    | 0.02(0.20)  | 0.13(0.14)  | 0.44(0.14)  | 0.11(0.24)  | 0.42(0.24)  | 0.31(0.20)  | 6.37E-01 | 8.94E-02 | 1.35E-01 | 9.98E-01 | 3.05E-01 | 4.00E-01 |
| 88583  | 0.02(0.14)  | -0.22(0.16) | 0.37(0.15)  | -0.24(0.21) | 0.35(0.20)  | 0.59(0.22)  | 2.61E-01 | 8.98E-02 | 9.36E-03 | 9.98E-01 | 3.05E-01 | 1.37E-01 |
| 18488  | -0.03(0.18) | 0.11(0.12)  | 0.41(0.19)  | 0.14(0.21)  | 0.43(0.25)  | 0.29(0.22)  | 5.09E-01 | 9.08E-02 | 1.96E-01 | 9.98E-01 | 3.06E-01 | 4.66E-01 |
| 453    | 0.02(0.14)  | 0.13(0.15)  | -0.42(0.22) | 0.12(0.21)  | -0.43(0.26) | -0.55(0.27) | 5.68E-01 | 1.03E-01 | 4.29E-02 | 9.98E-01 | 3.27E-01 | 2.41E-01 |
| 6538   | -0.15(0.15) | -0.01(0.17) | 0.22(0.17)  | 0.14(0.22)  | 0.37(0.22)  | 0.23(0.24)  | 5.39E-01 | 1.04E-01 | 3.38E-01 | 9.98E-01 | 3.27E-01 | 5.91E-01 |
| 132414 | -0.04(0.18) | 0.06(0.12)  | 0.46(0.26)  | 0.10(0.21)  | 0.50(0.31)  | 0.40(0.28)  | 6.29E-01 | 1.08E-01 | 1.62E-01 | 9.98E-01 | 3.35E-01 | 4.30E-01 |
| 98027  | 0.08(0.14)  | 0.02(0.23)  | 0.74(0.38)  | -0.06(0.28) | 0.66(0.41)  | 0.72(0.45)  | 8.22E-01 | 1.14E-01 | 1.11E-01 | 9.98E-01 | 3.42E-01 | 3.59E-01 |
| 4981   | -0.13(0.27) | 0.08(0.11)  | 0.49(0.28)  | 0.20(0.29)  | 0.61(0.38)  | 0.41(0.30)  | 4.83E-01 | 1.14E-01 | 1.75E-01 | 9.98E-01 | 3.42E-01 | 4.42E-01 |
| 1875   | 0.03(0.15)  | 0.20(0.13)  | 0.42(0.20)  | 0.17(0.20)  | 0.39(0.25)  | 0.22(0.24)  | 3.85E-01 | 1.15E-01 | 3.55E-01 | 9.98E-01 | 3.42E-01 | 6.03E-01 |
| 3329   | 0.02(0.13)  | 0.08(0.15)  | 0.61(0.36)  | 0.06(0.20)  | 0.59(0.37)  | 0.53(0.39)  | 7.50E-01 | 1.16E-01 | 1.77E-01 | 9.98E-01 | 3.42E-01 | 4.44E-01 |
| 7053   | 0.00(0.15)  | -0.24(0.18) | 0.35(0.17)  | -0.24(0.23) | 0.35(0.23)  | 0.59(0.25)  | 2.96E-01 | 1.28E-01 | 2.12E-02 | 9.98E-01 | 3.66E-01 | 1.86E-01 |
| 110    | 0.04(0.25)  | 0.10(0.15)  | 0.49(0.16)  | 0.07(0.29)  | 0.45(0.29)  | 0.39(0.22)  | 8.18E-01 | 1.31E-01 | 7.85E-02 | 9.98E-01 | 3.68E-01 | 3.08E-01 |
| 106936 | -0.02(0.17) | 0.09(0.14)  | 0.35(0.18)  | 0.11(0.21)  | 0.37(0.24)  | 0.26(0.22)  | 6.09E-01 | 1.32E-01 | 2.52E-01 | 9.98E-01 | 3.68E-01 | 5.17E-01 |
| 1029   | 0.14(0.20)  | -0.05(0.14) | 0.50(0.13)  | -0.19(0.23) | 0.36(0.23)  | 0.54(0.19)  | 4.30E-01 | 1.33E-01 | 4.82E-03 | 9.98E-01 | 3.68E-01 | 1.07E-01 |
| 31357  | 0.02(0.12)  | 0.28(0.21)  | -0.30(0.17) | 0.26(0.24)  | -0.31(0.21) | -0.58(0.27) | 2.76E-01 | 1.34E-01 | 3.81E-02 | 9.98E-01 | 3.68E-01 | 2.38E-01 |
| 2061   | 0.16(0.17)  | 0.08(0.14)  | 0.48(0.13)  | -0.08(0.22) | 0.32(0.21)  | 0.40(0.20)  | 7.19E-01 | 1.41E-01 | 5.13E-02 | 9.98E-01 | 3.78E-01 | 2.61E-01 |
| 5930   | 0.01(0.13)  | 0.02(0.19)  | 0.49(0.30)  | 0.01(0.23)  | 0.48(0.33)  | 0.47(0.36)  | 9.62E-01 | 1.48E-01 | 2.00E-01 | 9.98E-01 | 3.91E-01 | 4.66E-01 |
| 307    | -0.03(0.16) | 0.13(0.14)  | 0.32(0.18)  | 0.16(0.21)  | 0.35(0.24)  | 0.19(0.24)  | 4.46E-01 | 1.52E-01 | 4.31E-01 | 9.98E-01 | 3.97E-01 | 6.76E-01 |



|        |             |             |             |             |             |             |          |          |          |          |          |          |
|--------|-------------|-------------|-------------|-------------|-------------|-------------|----------|----------|----------|----------|----------|----------|
| 135889 | 0.08(0.20)  | -0.07(0.19) | -5.33(3.72) | -0.15(0.27) | -5.41(3.75) | -5.26(3.73) | 5.84E-01 | 1.54E-01 | 1.63E-01 | 9.98E-01 | 3.97E-01 | 4.30E-01 |
| 32247  | -0.04(0.18) | 0.14(0.15)  | 0.29(0.15)  | 0.18(0.23)  | 0.33(0.23)  | 0.15(0.21)  | 4.34E-01 | 1.56E-01 | 4.63E-01 | 9.98E-01 | 3.97E-01 | 7.06E-01 |
| 4985   | -0.13(0.32) | 0.08(0.16)  | 0.38(0.18)  | 0.21(0.35)  | 0.52(0.36)  | 0.31(0.24)  | 5.51E-01 | 1.60E-01 | 2.03E-01 | 9.98E-01 | 4.02E-01 | 4.66E-01 |
| 6526   | -0.02(0.25) | 0.08(0.11)  | 0.47(0.26)  | 0.10(0.26)  | 0.49(0.35)  | 0.39(0.28)  | 7.17E-01 | 1.65E-01 | 1.71E-01 | 9.98E-01 | 4.11E-01 | 4.42E-01 |
| 41699  | -0.03(0.19) | 0.12(0.13)  | 0.35(0.20)  | 0.15(0.22)  | 0.38(0.27)  | 0.22(0.23)  | 4.99E-01 | 1.66E-01 | 3.42E-01 | 9.98E-01 | 4.12E-01 | 5.94E-01 |
| 4983   | -0.01(0.19) | 0.04(0.12)  | 0.41(0.23)  | 0.04(0.22)  | 0.41(0.30)  | 0.37(0.27)  | 8.43E-01 | 1.69E-01 | 1.68E-01 | 9.98E-01 | 4.15E-01 | 4.41E-01 |
| 95550  | 0.01(0.15)  | 0.18(0.20)  | 0.29(0.14)  | 0.18(0.25)  | 0.28(0.20)  | 0.10(0.26)  | 4.91E-01 | 1.71E-01 | 6.87E-01 | 9.98E-01 | 4.19E-01 | 8.24E-01 |
| 4971   | -0.01(0.15) | 0.04(0.15)  | 0.32(0.19)  | 0.04(0.21)  | 0.32(0.24)  | 0.28(0.24)  | 8.45E-01 | 1.77E-01 | 2.37E-01 | 9.98E-01 | 4.29E-01 | 5.03E-01 |
| 4577   | -0.02(0.17) | -0.07(0.15) | 0.30(0.17)  | -0.06(0.23) | 0.32(0.23)  | 0.37(0.23)  | 8.10E-01 | 1.81E-01 | 1.03E-01 | 9.98E-01 | 4.29E-01 | 3.56E-01 |
| 87710  | -0.01(0.13) | 0.19(0.21)  | -0.30(0.17) | 0.20(0.25)  | -0.30(0.22) | -0.49(0.28) | 4.41E-01 | 1.82E-01 | 8.40E-02 | 9.98E-01 | 4.29E-01 | 3.20E-01 |
| 469    | -0.07(0.16) | -0.19(0.15) | 0.22(0.15)  | -0.11(0.22) | 0.29(0.22)  | 0.40(0.21)  | 6.13E-01 | 1.95E-01 | 6.36E-02 | 9.98E-01 | 4.53E-01 | 2.87E-01 |
| 6331   | -0.04(0.10) | 0.34(0.39)  | 0.57(0.47)  | 0.38(0.40)  | 0.61(0.48)  | 0.23(0.60)  | 3.43E-01 | 2.09E-01 | 7.01E-01 | 9.98E-01 | 4.77E-01 | 8.39E-01 |
| 4925   | 0.03(0.16)  | 0.15(0.13)  | 0.35(0.22)  | 0.12(0.21)  | 0.33(0.27)  | 0.20(0.25)  | 5.47E-01 | 2.31E-01 | 4.28E-01 | 9.98E-01 | 5.11E-01 | 6.76E-01 |
| 103102 | 0.11(0.16)  | 0.16(0.16)  | 0.35(0.14)  | 0.05(0.22)  | 0.25(0.21)  | 0.19(0.21)  | 8.09E-01 | 2.35E-01 | 3.59E-01 | 9.98E-01 | 5.16E-01 | 6.07E-01 |
| 91     | -0.01(0.19) | 0.01(0.15)  | 0.27(0.14)  | 0.02(0.24)  | 0.29(0.24)  | 0.26(0.20)  | 9.27E-01 | 2.40E-01 | 1.94E-01 | 9.98E-01 | 5.23E-01 | 4.66E-01 |
| 443    | 0.07(0.17)  | -0.09(0.14) | 0.35(0.15)  | -0.16(0.22) | 0.27(0.23)  | 0.44(0.21)  | 4.61E-01 | 2.42E-01 | 3.91E-02 | 9.98E-01 | 5.24E-01 | 2.38E-01 |
| 41708  | 0.02(0.22)  | 0.09(0.12)  | 0.36(0.21)  | 0.07(0.24)  | 0.33(0.29)  | 0.27(0.24)  | 7.87E-01 | 2.58E-01 | 2.69E-01 | 9.98E-01 | 5.50E-01 | 5.22E-01 |
| 2900   | 0.07(0.16)  | -0.06(0.16) | 0.36(0.20)  | -0.13(0.23) | 0.29(0.25)  | 0.41(0.26)  | 5.88E-01 | 2.60E-01 | 1.13E-01 | 9.98E-01 | 5.52E-01 | 3.60E-01 |
| 5483   | 0.01(0.15)  | 0.09(0.14)  | 0.34(0.25)  | 0.08(0.20)  | 0.32(0.29)  | 0.25(0.28)  | 6.90E-01 | 2.62E-01 | 3.91E-01 | 9.98E-01 | 5.52E-01 | 6.53E-01 |
| 1064   | 0.01(0.12)  | 0.14(0.22)  | -0.51(0.45) | 0.13(0.25)  | -0.52(0.46) | -0.65(0.50) | 5.92E-01 | 2.69E-01 | 2.03E-01 | 9.98E-01 | 5.63E-01 | 4.66E-01 |
| 39     | -0.03(0.14) | 0.18(0.17)  | 0.23(0.20)  | 0.21(0.22)  | 0.26(0.24)  | 0.05(0.26)  | 3.48E-01 | 2.72E-01 | 8.44E-01 | 9.98E-01 | 5.63E-01 | 9.34E-01 |
| 657    | -0.03(0.18) | 0.02(0.13)  | 0.25(0.18)  | 0.05(0.22)  | 0.28(0.26)  | 0.23(0.22)  | 8.29E-01 | 2.75E-01 | 2.89E-01 | 9.98E-01 | 5.66E-01 | 5.44E-01 |
| 121002 | -0.06(0.15) | 0.02(0.16)  | -0.30(0.17) | 0.08(0.23)  | -0.24(0.22) | -0.32(0.24) | 7.12E-01 | 2.78E-01 | 1.80E-01 | 9.98E-01 | 5.70E-01 | 4.50E-01 |
| 8607   | -0.07(0.19) | -0.04(0.23) | -0.31(0.11) | 0.03(0.29)  | -0.24(0.22) | -0.27(0.26) | 9.24E-01 | 2.80E-01 | 3.02E-01 | 9.98E-01 | 5.70E-01 | 5.64E-01 |
| 26918  | -0.03(0.09) | 0.56(1.18)  | 8.99(8.32)  | 0.59(1.18)  | 9.02(8.32)  | 8.43(8.37)  | 6.19E-01 | 2.82E-01 | 3.18E-01 | 9.98E-01 | 5.73E-01 | 5.75E-01 |
| 91421  | 0.01(0.15)  | 0.11(0.18)  | -0.25(0.19) | 0.10(0.24)  | -0.26(0.24) | -0.36(0.25) | 6.72E-01 | 2.89E-01 | 1.63E-01 | 9.98E-01 | 5.80E-01 | 4.30E-01 |
| 119023 | 0.02(0.29)  | 0.00(0.15)  | 0.34(0.12)  | -0.02(0.33) | 0.32(0.31)  | 0.34(0.19)  | 9.52E-01 | 2.98E-01 | 6.93E-02 | 9.98E-01 | 5.94E-01 | 2.95E-01 |
| 2011   | 0.00(0.16)  | 0.13(0.17)  | 0.22(0.15)  | 0.13(0.22)  | 0.22(0.22)  | 0.10(0.23)  | 5.64E-01 | 3.04E-01 | 6.80E-01 | 9.98E-01 | 5.95E-01 | 8.21E-01 |
| 132976 | -0.04(0.16) | 0.05(0.18)  | 0.18(0.14)  | 0.08(0.24)  | 0.22(0.21)  | 0.14(0.22)  | 7.25E-01 | 3.06E-01 | 5.48E-01 | 9.98E-01 | 5.95E-01 | 7.63E-01 |

|        |             |             |             |             |             |             |          |          |          |          |          |          |
|--------|-------------|-------------|-------------|-------------|-------------|-------------|----------|----------|----------|----------|----------|----------|
| 4533   | -0.05(0.24) | 0.03(0.20)  | -0.32(0.12) | 0.08(0.31)  | -0.27(0.26) | -0.35(0.23) | 8.05E-01 | 3.11E-01 | 1.39E-01 | 9.98E-01 | 5.99E-01 | 4.04E-01 |
| 5419   | -0.01(0.37) | 0.09(0.14)  | 0.39(0.13)  | 0.10(0.39)  | 0.40(0.39)  | 0.30(0.19)  | 7.96E-01 | 3.14E-01 | 1.23E-01 | 9.98E-01 | 6.00E-01 | 3.78E-01 |
| 135619 | 0.03(0.20)  | 0.17(0.19)  | 0.27(0.13)  | 0.14(0.29)  | 0.24(0.25)  | 0.10(0.22)  | 6.37E-01 | 3.44E-01 | 6.60E-01 | 9.98E-01 | 6.36E-01 | 8.13E-01 |
| 8270   | 0.04(0.15)  | 0.04(0.24)  | -0.16(0.14) | -0.00(0.28) | -0.20(0.21) | -0.20(0.27) | 9.95E-01 | 3.44E-01 | 4.76E-01 | 9.99E-01 | 6.36E-01 | 7.13E-01 |
| 126397 | 0.04(0.13)  | 0.04(0.15)  | 0.31(0.26)  | -0.00(0.20) | 0.27(0.28)  | 0.26(0.29)  | 9.94E-01 | 3.49E-01 | 3.70E-01 | 9.99E-01 | 6.36E-01 | 6.23E-01 |
| 3465   | 0.05(0.13)  | -0.05(0.19) | -0.17(0.19) | -0.10(0.23) | -0.22(0.23) | -0.12(0.26) | 6.73E-01 | 3.49E-01 | 6.39E-01 | 9.98E-01 | 6.36E-01 | 8.03E-01 |
| 6580   | 0.06(0.15)  | 0.13(0.14)  | 0.33(0.25)  | 0.07(0.20)  | 0.27(0.28)  | 0.20(0.28)  | 7.18E-01 | 3.49E-01 | 4.92E-01 | 9.98E-01 | 6.36E-01 | 7.17E-01 |
| 4941   | -0.01(0.17) | 0.05(0.14)  | 0.28(0.28)  | 0.06(0.21)  | 0.30(0.32)  | 0.24(0.31)  | 7.81E-01 | 3.57E-01 | 4.47E-01 | 9.98E-01 | 6.47E-01 | 6.90E-01 |
| 119066 | 0.01(0.15)  | -0.09(0.20) | 0.20(0.15)  | -0.10(0.26) | 0.19(0.21)  | 0.29(0.26)  | 7.05E-01 | 3.75E-01 | 2.70E-01 | 9.98E-01 | 6.76E-01 | 5.22E-01 |
| 160543 | 0.01(0.28)  | 0.20(0.18)  | -0.26(0.13) | 0.19(0.32)  | -0.27(0.30) | -0.45(0.22) | 5.61E-01 | 3.80E-01 | 4.57E-02 | 9.98E-01 | 6.82E-01 | 2.47E-01 |
| 106629 | 0.01(0.14)  | 0.11(0.15)  | 0.24(0.23)  | 0.10(0.21)  | 0.23(0.27)  | 0.13(0.27)  | 6.34E-01 | 3.93E-01 | 6.33E-01 | 9.98E-01 | 6.84E-01 | 8.02E-01 |
| 62433  | 0.08(0.15)  | 0.14(0.16)  | 0.27(0.15)  | 0.06(0.22)  | 0.19(0.22)  | 0.12(0.22)  | 7.78E-01 | 3.97E-01 | 5.82E-01 | 9.98E-01 | 6.86E-01 | 7.88E-01 |
| 16788  | 0.11(0.26)  | 0.01(0.17)  | 0.35(0.11)  | -0.10(0.30) | 0.24(0.28)  | 0.34(0.20)  | 7.35E-01 | 4.01E-01 | 9.07E-02 | 9.98E-01 | 6.89E-01 | 3.26E-01 |
| 159824 | 0.02(0.17)  | -0.04(0.15) | -0.17(0.15) | -0.07(0.23) | -0.20(0.23) | -0.13(0.22) | 7.82E-01 | 4.02E-01 | 5.48E-01 | 9.98E-01 | 6.89E-01 | 7.63E-01 |
| 117171 | 0.01(0.14)  | -0.02(0.20) | 0.18(0.16)  | -0.02(0.24) | 0.18(0.21)  | 0.20(0.25)  | 9.19E-01 | 4.06E-01 | 4.33E-01 | 9.98E-01 | 6.89E-01 | 6.76E-01 |
| 17664  | 0.01(0.17)  | 0.06(0.13)  | 0.22(0.18)  | 0.05(0.22)  | 0.21(0.25)  | 0.16(0.22)  | 8.20E-01 | 4.09E-01 | 4.77E-01 | 9.98E-01 | 6.91E-01 | 7.13E-01 |
| 17068  | 0.15(0.14)  | 0.00(0.16)  | 0.33(0.17)  | -0.15(0.22) | 0.17(0.21)  | 0.33(0.23)  | 4.82E-01 | 4.21E-01 | 1.58E-01 | 9.98E-01 | 7.02E-01 | 4.30E-01 |
| 137    | -0.04(0.17) | 0.12(0.17)  | -0.22(0.15) | 0.16(0.24)  | -0.18(0.22) | -0.34(0.23) | 4.94E-01 | 4.29E-01 | 1.39E-01 | 9.98E-01 | 7.11E-01 | 4.04E-01 |
| 4975   | 0.00(0.13)  | 0.15(0.18)  | -0.17(0.16) | 0.15(0.22)  | -0.17(0.21) | -0.31(0.24) | 5.18E-01 | 4.30E-01 | 2.05E-01 | 9.98E-01 | 7.11E-01 | 4.68E-01 |
| 4609   | -0.25(0.66) | 0.04(0.18)  | 0.29(0.18)  | 0.28(0.68)  | 0.54(0.68)  | 0.25(0.25)  | 6.79E-01 | 4.33E-01 | 3.16E-01 | 9.98E-01 | 7.11E-01 | 5.75E-01 |
| 4922   | -0.08(0.45) | 0.03(0.15)  | 0.29(0.17)  | 0.11(0.47)  | 0.37(0.47)  | 0.26(0.22)  | 8.18E-01 | 4.42E-01 | 2.52E-01 | 9.98E-01 | 7.15E-01 | 5.17E-01 |
| 6115   | -0.10(0.14) | 0.10(0.16)  | -0.30(0.23) | 0.20(0.21)  | -0.21(0.27) | -0.40(0.28) | 3.43E-01 | 4.44E-01 | 1.51E-01 | 9.98E-01 | 7.15E-01 | 4.29E-01 |
| 4986   | -0.09(0.23) | 0.05(0.16)  | -0.30(0.14) | 0.14(0.28)  | -0.20(0.27) | -0.35(0.21) | 6.03E-01 | 4.50E-01 | 1.10E-01 | 9.98E-01 | 7.21E-01 | 3.59E-01 |
| 4929   | 0.00(0.27)  | 0.10(0.14)  | -0.23(0.15) | 0.10(0.30)  | -0.23(0.31) | -0.33(0.21) | 7.40E-01 | 4.56E-01 | 1.14E-01 | 9.98E-01 | 7.24E-01 | 3.62E-01 |
| 100253 | 0.10(0.23)  | 0.04(0.12)  | 0.31(0.17)  | -0.05(0.26) | 0.21(0.28)  | 0.26(0.21)  | 8.37E-01 | 4.62E-01 | 2.17E-01 | 9.98E-01 | 7.24E-01 | 4.81E-01 |
| 1725   | -0.03(0.14) | -0.16(0.19) | 0.13(0.17)  | -0.13(0.23) | 0.16(0.22)  | 0.29(0.25)  | 5.76E-01 | 4.63E-01 | 2.56E-01 | 9.98E-01 | 7.24E-01 | 5.17E-01 |
| 4546   | 0.10(0.34)  | 0.05(0.20)  | -0.17(0.13) | -0.05(0.40) | -0.27(0.37) | -0.22(0.24) | 9.05E-01 | 4.64E-01 | 3.55E-01 | 9.98E-01 | 7.24E-01 | 6.03E-01 |
| 6066   | 0.08(0.17)  | -0.15(0.16) | 0.24(0.14)  | -0.23(0.24) | 0.16(0.23)  | 0.39(0.21)  | 3.39E-01 | 4.76E-01 | 6.85E-02 | 9.98E-01 | 7.26E-01 | 2.95E-01 |
| 4871   | -0.05(0.12) | 0.22(0.32)  | -0.19(0.16) | 0.28(0.33)  | -0.14(0.20) | -0.42(0.35) | 4.11E-01 | 4.79E-01 | 2.39E-01 | 9.98E-01 | 7.26E-01 | 5.03E-01 |

|        |             |             |             |             |             |             |          |          |          |          |          |          |
|--------|-------------|-------------|-------------|-------------|-------------|-------------|----------|----------|----------|----------|----------|----------|
| 4926   | 0.02(0.60)  | -0.03(0.15) | -0.41(0.13) | -0.05(0.61) | -0.43(0.61) | -0.38(0.20) | 9.33E-01 | 4.82E-01 | 6.36E-02 | 9.98E-01 | 7.26E-01 | 2.87E-01 |
| 47170  | -0.04(0.17) | 0.11(0.16)  | 0.12(0.16)  | 0.15(0.23)  | 0.16(0.23)  | 0.01(0.22)  | 5.26E-01 | 4.99E-01 | 9.65E-01 | 9.98E-01 | 7.44E-01 | 9.94E-01 |
| 4887   | -0.02(0.18) | 0.10(0.17)  | -0.18(0.15) | 0.12(0.25)  | -0.16(0.24) | -0.28(0.23) | 6.34E-01 | 5.08E-01 | 2.27E-01 | 9.98E-01 | 7.49E-01 | 4.89E-01 |
| 160    | -0.02(0.24) | -0.26(0.17) | 0.16(0.16)  | -0.23(0.28) | 0.18(0.28)  | 0.42(0.22)  | 4.10E-01 | 5.10E-01 | 6.72E-02 | 9.98E-01 | 7.49E-01 | 2.95E-01 |
| 153    | -0.02(0.15) | -0.04(0.18) | 0.12(0.16)  | -0.02(0.24) | 0.14(0.22)  | 0.16(0.25)  | 9.40E-01 | 5.11E-01 | 5.11E-01 | 9.98E-01 | 7.49E-01 | 7.35E-01 |
| 21666  | 0.01(0.17)  | 0.04(0.15)  | 0.15(0.15)  | 0.03(0.23)  | 0.14(0.23)  | 0.11(0.21)  | 8.91E-01 | 5.30E-01 | 6.02E-01 | 9.98E-01 | 7.66E-01 | 8.02E-01 |
| 109423 | -0.05(0.11) | -1.09(1.10) | 0.08(0.18)  | -1.04(1.10) | 0.13(0.21)  | 1.17(1.10)  | 3.49E-01 | 5.49E-01 | 2.94E-01 | 9.98E-01 | 7.90E-01 | 5.51E-01 |
| 68     | 0.05(0.15)  | 0.11(0.19)  | 0.17(0.14)  | 0.06(0.24)  | 0.12(0.21)  | 0.06(0.24)  | 8.08E-01 | 5.59E-01 | 7.93E-01 | 9.98E-01 | 7.98E-01 | 9.14E-01 |
| 257    | 0.03(0.18)  | -0.05(0.14) | -0.11(0.17) | -0.08(0.22) | -0.14(0.25) | -0.07(0.22) | 7.36E-01 | 5.59E-01 | 7.54E-01 | 9.98E-01 | 7.98E-01 | 8.82E-01 |
| 4956   | -0.06(0.17) | 0.09(0.13)  | -0.24(0.24) | 0.15(0.21)  | -0.17(0.30) | -0.33(0.27) | 4.79E-01 | 5.62E-01 | 2.36E-01 | 9.98E-01 | 7.98E-01 | 5.03E-01 |
| 87720  | 0.03(0.18)  | 0.14(0.14)  | 0.17(0.16)  | 0.11(0.23)  | 0.14(0.24)  | 0.03(0.21)  | 6.42E-01 | 5.69E-01 | 8.78E-01 | 9.98E-01 | 7.99E-01 | 9.50E-01 |
| 31559  | -0.23(0.24) | 0.21(0.67)  | -0.08(0.10) | 0.44(0.70)  | 0.15(0.26)  | -0.29(0.67) | 5.36E-01 | 5.79E-01 | 6.66E-01 | 9.98E-01 | 8.05E-01 | 8.17E-01 |
| 17253  | -0.27(0.53) | 0.05(0.19)  | 0.04(0.15)  | 0.31(0.56)  | 0.31(0.56)  | -0.01(0.24) | 5.79E-01 | 5.83E-01 | 9.82E-01 | 9.98E-01 | 8.06E-01 | 9.94E-01 |
| 26916  | -0.03(0.09) | 0.83(1.18)  | 6.77(12.35) | 0.86(1.18)  | 6.8(12.35)  | 5.94(12.38) | 4.69E-01 | 5.84E-01 | 6.33E-01 | 9.98E-01 | 8.06E-01 | 8.02E-01 |
| 1148   | 0.06(0.28)  | -0.15(0.15) | 0.21(0.13)  | -0.20(0.32) | 0.16(0.31)  | 0.36(0.20)  | 5.24E-01 | 6.10E-01 | 7.19E-02 | 9.98E-01 | 8.30E-01 | 2.98E-01 |
| 41808  | -0.07(0.13) | -0.01(0.18) | -0.19(0.21) | 0.06(0.23)  | -0.12(0.24) | -0.18(0.28) | 7.83E-01 | 6.16E-01 | 5.16E-01 | 9.98E-01 | 8.36E-01 | 7.40E-01 |
| 7403   | 0.28(1.33)  | 0.00(0.14)  | 0.94(0.20)  | -0.27(1.34) | 0.66(1.35)  | 0.94(0.24)  | 8.38E-01 | 6.24E-01 | 2.11E-04 | 9.98E-01 | 8.43E-01 | 1.83E-02 |
| 7440   | 0.05(1.61)  | -0.04(0.12) | 0.82(0.15)  | -0.10(1.61) | 0.76(1.62)  | 0.86(0.19)  | 9.52E-01 | 6.38E-01 | 3.58E-05 | 9.98E-01 | 8.46E-01 | 1.26E-02 |
| 4938   | 0.02(0.19)  | 0.12(0.13)  | 0.19(0.33)  | 0.09(0.22)  | 0.17(0.36)  | 0.08(0.35)  | 6.82E-01 | 6.42E-01 | 8.25E-01 | 9.98E-01 | 8.46E-01 | 9.33E-01 |
| 2001   | 0.03(0.19)  | 0.04(0.15)  | 0.15(0.16)  | 0.01(0.24)  | 0.12(0.25)  | 0.11(0.21)  | 9.73E-01 | 6.42E-01 | 6.14E-01 | 9.98E-01 | 8.46E-01 | 8.02E-01 |
| 2806   | -0.76(1.59) | 0.03(0.17)  | -0.05(0.16) | 0.78(1.61)  | 0.71(1.60)  | -0.08(0.23) | 6.28E-01 | 6.60E-01 | 7.45E-01 | 9.98E-01 | 8.64E-01 | 8.75E-01 |
| 145492 | -0.05(0.23) | 0.09(0.16)  | 0.07(0.15)  | 0.14(0.28)  | 0.12(0.27)  | -0.02(0.21) | 6.21E-01 | 6.62E-01 | 9.30E-01 | 9.98E-01 | 8.64E-01 | 9.79E-01 |
| 1981   | -0.05(0.11) | 0.14(0.37)  | 0.04(0.19)  | 0.19(0.39)  | 0.09(0.22)  | -0.10(0.42) | 6.18E-01 | 6.83E-01 | 8.05E-01 | 9.98E-01 | 8.82E-01 | 9.25E-01 |
| 573    | -0.02(0.13) | 0.21(0.26)  | -0.10(0.17) | 0.23(0.29)  | -0.08(0.21) | -0.31(0.31) | 4.39E-01 | 6.93E-01 | 3.22E-01 | 9.98E-01 | 8.88E-01 | 5.75E-01 |
| 5085   | 0.14(0.32)  | -0.04(0.21) | 0.00(0.13)  | -0.17(0.39) | -0.13(0.34) | 0.04(0.25)  | 6.58E-01 | 7.02E-01 | 8.72E-01 | 9.98E-01 | 8.94E-01 | 9.50E-01 |
| 133943 | -0.03(0.33) | 0.08(0.16)  | 0.09(0.15)  | 0.11(0.36)  | 0.12(0.35)  | 0.01(0.22)  | 7.57E-01 | 7.29E-01 | 9.59E-01 | 9.98E-01 | 9.21E-01 | 9.93E-01 |
| 54     | -0.09(0.16) | 0.07(0.14)  | -0.19(0.23) | 0.16(0.20)  | -0.09(0.27) | -0.26(0.26) | 4.28E-01 | 7.35E-01 | 3.38E-01 | 9.98E-01 | 9.21E-01 | 5.91E-01 |
| 4928   | -0.16(1.00) | 0.03(0.15)  | 0.16(0.19)  | 0.19(1.01)  | 0.32(1.01)  | 0.13(0.24)  | 8.54E-01 | 7.52E-01 | 5.83E-01 | 9.98E-01 | 9.23E-01 | 7.88E-01 |
| 892    | -0.01(0.19) | 0.11(0.12)  | -0.11(0.29) | 0.11(0.22)  | -0.11(0.34) | -0.22(0.32) | 6.19E-01 | 7.60E-01 | 4.92E-01 | 9.98E-01 | 9.24E-01 | 7.17E-01 |

|        |             |             |             |             |             |             |          |          |          |          |          |          |
|--------|-------------|-------------|-------------|-------------|-------------|-------------|----------|----------|----------|----------|----------|----------|
| 20903  | 0.05(0.31)  | -0.01(0.12) | 0.16(0.20)  | -0.06(0.33) | 0.11(0.35)  | 0.17(0.23)  | 8.58E-01 | 7.61E-01 | 4.61E-01 | 9.98E-01 | 9.24E-01 | 7.06E-01 |
| 4898   | -0.01(0.14) | 0.05(0.20)  | 0.06(0.16)  | 0.06(0.24)  | 0.06(0.21)  | 0.00(0.25)  | 8.09E-01 | 7.62E-01 | 9.85E-01 | 9.98E-01 | 9.24E-01 | 9.94E-01 |
| 9320   | -0.02(0.15) | 0.08(0.22)  | 0.04(0.14)  | 0.10(0.27)  | 0.06(0.21)  | -0.04(0.26) | 7.18E-01 | 7.72E-01 | 8.87E-01 | 9.98E-01 | 9.33E-01 | 9.55E-01 |
| 1912   | 0.02(0.14)  | -0.04(0.17) | 0.08(0.18)  | -0.05(0.22) | 0.06(0.23)  | 0.12(0.24)  | 8.07E-01 | 7.79E-01 | 6.28E-01 | 9.98E-01 | 9.33E-01 | 8.02E-01 |
| 2936   | 0.04(0.20)  | -0.11(0.20) | -0.03(0.13) | -0.15(0.28) | -0.07(0.24) | 0.08(0.24)  | 5.94E-01 | 7.82E-01 | 7.20E-01 | 9.98E-01 | 9.33E-01 | 8.57E-01 |
| 34075  | 0.07(0.16)  | -0.29(0.15) | 0.13(0.16)  | -0.35(0.22) | 0.06(0.22)  | 0.42(0.22)  | 1.14E-01 | 7.84E-01 | 6.18E-02 | 9.98E-01 | 9.33E-01 | 2.87E-01 |
| 119129 | 0.99(3.36)  | 0.06(0.16)  | 0.11(0.11)  | -0.93(3.37) | -0.89(3.36) | 0.04(0.19)  | 7.83E-01 | 7.93E-01 | 8.19E-01 | 9.98E-01 | 9.37E-01 | 9.30E-01 |
| 127277 | -0.03(0.14) | -0.24(0.15) | -0.27(1.07) | -0.21(0.20) | -0.25(1.07) | -0.04(1.08) | 2.99E-01 | 8.17E-01 | 9.73E-01 | 9.98E-01 | 9.44E-01 | 9.94E-01 |
| 1704   | -0.14(0.19) | 0.05(0.13)  | -0.19(0.17) | 0.18(0.23)  | -0.06(0.25) | -0.24(0.21) | 4.24E-01 | 8.18E-01 | 2.59E-01 | 9.98E-01 | 9.44E-01 | 5.17E-01 |
| 139436 | 0.03(0.48)  | 0.15(0.24)  | -0.08(0.12) | 0.12(0.53)  | -0.11(0.49) | -0.23(0.27) | 8.25E-01 | 8.22E-01 | 3.99E-01 | 9.98E-01 | 9.44E-01 | 6.57E-01 |
| 111162 | -0.44(3.88) | 0.00(0.16)  | 0.41(0.13)  | 0.43(3.87)  | 0.84(3.87)  | 0.41(0.20)  | 9.12E-01 | 8.28E-01 | 4.73E-02 | 9.98E-01 | 9.46E-01 | 2.48E-01 |
| 4600   | 0.00(0.21)  | -0.09(0.25) | 0.05(0.12)  | -0.09(0.33) | 0.05(0.23)  | 0.14(0.28)  | 7.83E-01 | 8.33E-01 | 6.14E-01 | 9.98E-01 | 9.48E-01 | 8.02E-01 |
| 7402   | -0.04(0.81) | 0.08(0.17)  | 0.13(0.19)  | 0.12(0.82)  | 0.17(0.83)  | 0.05(0.25)  | 8.86E-01 | 8.42E-01 | 8.52E-01 | 9.98E-01 | 9.48E-01 | 9.34E-01 |
| 1941   | -0.01(0.16) | -0.13(0.15) | -0.06(0.17) | -0.11(0.22) | -0.05(0.23) | 0.07(0.23)  | 6.09E-01 | 8.45E-01 | 7.71E-01 | 9.98E-01 | 9.48E-01 | 8.97E-01 |
| 139478 | -0.35(1.66) | -0.02(0.16) | -0.02(0.22) | 0.32(1.67)  | 0.33(1.68)  | 0.00(0.27)  | 8.47E-01 | 8.46E-01 | 9.90E-01 | 9.98E-01 | 9.48E-01 | 9.94E-01 |
| 6353   | -0.17(0.24) | -0.04(0.13) | -0.12(0.19) | 0.13(0.27)  | 0.05(0.29)  | -0.08(0.22) | 6.16E-01 | 8.52E-01 | 7.21E-01 | 9.98E-01 | 9.48E-01 | 8.57E-01 |
| 160463 | 0.05(0.17)  | -0.06(0.14) | 0.01(0.16)  | -0.11(0.22) | -0.04(0.24) | 0.07(0.21)  | 6.11E-01 | 8.60E-01 | 7.37E-01 | 9.98E-01 | 9.48E-01 | 8.71E-01 |
| 119167 | 0.11(0.21)  | 0.07(0.21)  | 0.07(0.12)  | -0.04(0.31) | -0.04(0.25) | 0.00(0.24)  | 9.01E-01 | 8.86E-01 | 9.91E-01 | 9.98E-01 | 9.60E-01 | 9.94E-01 |
| 915    | 0.86(2.21)  | -0.01(0.16) | 0.55(0.16)  | -0.86(2.21) | -0.31(2.21) | 0.56(0.22)  | 6.98E-01 | 8.90E-01 | 1.42E-02 | 9.98E-01 | 9.61E-01 | 1.53E-01 |
| 4933   | 0.00(0.11)  | 0.00(0.26)  | 0.03(0.22)  | -0.00(0.29) | 0.03(0.25)  | 0.03(0.33)  | 9.98E-01 | 9.00E-01 | 9.24E-01 | 9.99E-01 | 9.63E-01 | 9.79E-01 |
| 41682  | 0.05(0.14)  | 0.19(0.23)  | 0.07(0.15)  | 0.14(0.28)  | 0.03(0.21)  | -0.11(0.27) | 6.14E-01 | 9.03E-01 | 6.70E-01 | 9.98E-01 | 9.63E-01 | 8.18E-01 |
| 160464 | 0.23(2.25)  | 0.00(0.18)  | -0.04(0.15) | -0.23(2.25) | -0.27(2.25) | -0.04(0.23) | 9.18E-01 | 9.04E-01 | 8.76E-01 | 9.98E-01 | 9.63E-01 | 9.50E-01 |
| 6802   | 0.01(0.17)  | 0.13(0.13)  | -0.03(0.32) | 0.12(0.21)  | -0.04(0.36) | -0.16(0.34) | 5.61E-01 | 9.18E-01 | 6.44E-01 | 9.98E-01 | 9.72E-01 | 8.05E-01 |
| 64551  | -0.08(0.19) | 0.06(0.15)  | -0.06(0.16) | 0.14(0.24)  | 0.02(0.25)  | -0.12(0.22) | 5.52E-01 | 9.34E-01 | 5.68E-01 | 9.98E-01 | 9.74E-01 | 7.81E-01 |
| 1675   | 0.01(0.11)  | 0.53(0.76)  | -0.01(0.16) | 0.52(0.77)  | -0.02(0.20) | -0.54(0.78) | 5.02E-01 | 9.37E-01 | 4.92E-01 | 9.98E-01 | 9.74E-01 | 7.17E-01 |
| 4543   | 0.02(0.30)  | 0.03(0.15)  | 0.04(0.16)  | 0.01(0.34)  | 0.02(0.33)  | 0.01(0.22)  | 9.71E-01 | 9.42E-01 | 9.56E-01 | 9.98E-01 | 9.74E-01 | 9.93E-01 |
| 16792  | 0.03(0.13)  | -0.29(0.19) | 0.01(0.19)  | -0.32(0.23) | -0.02(0.24) | 0.30(0.27)  | 1.75E-01 | 9.43E-01 | 2.77E-01 | 9.98E-01 | 9.74E-01 | 5.27E-01 |
| 4948   | 0.00(0.20)  | 0.09(0.12)  | 0.02(0.23)  | 0.10(0.23)  | 0.02(0.31)  | -0.07(0.26) | 6.79E-01 | 9.45E-01 | 7.74E-01 | 9.98E-01 | 9.74E-01 | 8.98E-01 |
| 160542 | -0.09(1.24) | 0.17(0.26)  | -0.01(0.11) | 0.26(1.24)  | 0.08(1.24)  | -0.18(0.28) | 8.34E-01 | 9.48E-01 | 5.29E-01 | 9.98E-01 | 9.74E-01 | 7.48E-01 |

---

Regression coefficient  $\beta^*$  (standard error (SE)) denotes the association between baseline level of each metabolite and change in HbA1c in each intervention group (IMI, BAND or RYGB).  $\beta^\dagger$  (SE) denotes the association between baseline level of each metabolite and change in HbA1c induced by different types of weight-loss interventions (BAND vs. IMI, RYGB vs. IMI, and RYGB vs. BAND), and was obtained from the interaction term (metabolite  $\times$  types of intervention) in a linear regression model. In this model, % change in HbA1c (follow-up value minus baseline value, divided by baseline value) was the dependent variable, baseline level of each metabolite, intervention groups (1=IMI, 2=BAND, 3=RYGB, with IMI being the reference), and an interaction term (metabolite  $\times$  types of intervention) were the independent variables, adjusting for baseline age, sex, BMI as well as weight loss. Abbreviations: IMI: Intensive medical intervention. BAND: Laparoscopic adjustable banding. RYGB: Roux-en-Y gastric bypass surgery.

**Table S3. Differential association between changes in metabolites and change in FPG before and 1-yr after intervention**

| Metabolites           | $\beta^*(SE)$ |             |             | $\beta^\dagger(SE)$ |              |               | p-value      |              |               | q-value      |              |               |
|-----------------------|---------------|-------------|-------------|---------------------|--------------|---------------|--------------|--------------|---------------|--------------|--------------|---------------|
|                       | IMI           | BAND        | RYGB        | BAND vs. IMI        | RYGB vs. IMI | RYGB vs. BAND | BAND vs. IMI | RYGB vs. IMI | RYGB vs. BAND | BAND vs. IMI | RYGB vs. IMI | RYGB vs. BAND |
| <b>Known</b>          |               |             |             |                     |              |               |              |              |               |              |              |               |
| Gluconic acid         | -0.02(0.14)   | -0.22(0.13) | 2.95(0.47)  | -0.21(0.19)         | 2.97(0.49)   | 3.17(0.49)    | 2.90E-01     | 1.02E-07     | 1.80E-08      | 9.96E-01     | 1.92E-05     | 3.40E-06      |
| Fructose              | -0.37(0.37)   | -0.03(0.11) | 3.91(0.71)  | 0.34(0.38)          | 4.28(0.81)   | 3.94(0.72)    | 3.80E-01     | 1.74E-06     | 8.88E-07      | 9.96E-01     | 2.19E-04     | 1.12E-04      |
| Xylose                | -0.03(0.12)   | -0.39(0.35) | 2.15(0.47)  | -0.36(0.37)         | 2.17(0.48)   | 2.54(0.59)    | 3.29E-01     | 2.87E-05     | 5.92E-05      | 9.96E-01     | 1.98E-03     | 3.19E-03      |
| Valine                | 0.01(0.15)    | -0.01(0.24) | -0.97(0.17) | -0.03(0.28)         | -0.98(0.22)  | -0.95(0.29)   | 9.28E-01     | 4.80E-05     | 1.72E-03      | 9.96E-01     | 2.58E-03     | 2.70E-02      |
| Glycine               | -0.09(0.16)   | -0.54(0.36) | -0.99(0.15) | -0.44(0.39)         | -0.90(0.22)  | -0.46(0.38)   | 2.62E-01     | 1.07E-04     | 2.37E-01      | 9.96E-01     | 3.71E-03     | 5.28E-01      |
| Leucine               | 0.01(0.15)    | -0.15(0.22) | -0.95(0.18) | -0.16(0.26)         | -0.96(0.23)  | -0.80(0.28)   | 5.49E-01     | 1.08E-04     | 6.56E-03      | 9.96E-01     | 3.71E-03     | 6.19E-02      |
| Benzoic acid          | -0.12(0.14)   | -0.33(0.29) | -2.65(0.60) | -0.21(0.32)         | -2.53(0.62)  | -2.32(0.66)   | 5.11E-01     | 1.18E-04     | 8.42E-04      | 9.96E-01     | 3.71E-03     | 1.98E-02      |
| Proline               | 0.03(0.27)    | -0.01(0.12) | -2.50(0.56) | -0.04(0.30)         | -2.53(0.62)  | -2.49(0.57)   | 8.90E-01     | 1.29E-04     | 4.93E-05      | 9.96E-01     | 3.74E-03     | 3.10E-03      |
| Dodecanol             | -0.10(0.16)   | -0.20(0.19) | -0.94(0.13) | -0.10(0.24)         | -0.84(0.21)  | -0.74(0.23)   | 6.78E-01     | 1.52E-04     | 2.27E-03      | 9.96E-01     | 4.10E-03     | 2.91E-02      |
| Hypoxanthine          | -0.01(0.12)   | -0.08(0.37) | -1.33(0.31) | -0.07(0.39)         | -1.32(0.33)  | -1.25(0.48)   | 8.54E-01     | 1.97E-04     | 1.17E-02      | 9.96E-01     | 4.94E-03     | 1.03E-01      |
| Caprylic acid         | -0.06(0.17)   | -0.06(0.21) | -0.90(0.17) | -0.00(0.28)         | -0.85(0.24)  | -0.84(0.27)   | 9.92E-01     | 8.53E-04     | 2.32E-03      | 9.96E-01     | 1.89E-02     | 2.91E-02      |
| 1-monostearin         | -0.02(0.20)   | 0.14(0.14)  | -1.00(0.21) | 0.15(0.25)          | -0.98(0.29)  | -1.14(0.26)   | 5.39E-01     | 1.31E-03     | 3.86E-05      | 9.96E-01     | 2.37E-02     | 2.91E-03      |
| Threonine             | -0.15(0.19)   | -0.14(0.18) | -0.93(0.13) | 0.01(0.26)          | -0.78(0.24)  | -0.79(0.22)   | 9.74E-01     | 1.45E-03     | 6.76E-04      | 9.96E-01     | 2.37E-02     | 1.81E-02      |
| Indole-3-lactate      | 0.05(0.18)    | 0.13(0.22)  | -0.77(0.18) | 0.09(0.28)          | -0.81(0.25)  | -0.90(0.28)   | 7.56E-01     | 1.94E-03     | 2.16E-03      | 9.96E-01     | 2.37E-02     | 2.91E-02      |
| Aminomalonate         | 0.02(0.13)    | -0.49(0.51) | -0.98(0.29) | -0.51(0.52)         | -1.01(0.31)  | -0.50(0.57)   | 3.31E-01     | 1.97E-03     | 3.82E-01      | 9.96E-01     | 2.37E-02     | 6.45E-01      |
| Pelargonic acid       | -0.06(0.16)   | 0.18(0.26)  | -0.88(0.19) | 0.24(0.30)          | -0.82(0.25)  | -1.06(0.32)   | 4.39E-01     | 2.01E-03     | 1.48E-03      | 9.96E-01     | 2.37E-02     | 2.66E-02      |
| Pyrophosphate         | 0.08(0.12)    | 0.81(0.99)  | -1.86(0.60) | 0.73(1.00)          | -1.94(0.62)  | -2.68(1.17)   | 4.66E-01     | 2.55E-03     | 2.52E-02      | 9.96E-01     | 2.91E-02     | 1.66E-01      |
| UDP-glucuronic acid   | -0.04(0.21)   | 0.21(0.15)  | 0.84(0.19)  | 0.25(0.26)          | 0.88(0.28)   | 0.62(0.24)    | 3.32E-01     | 2.72E-03     | 1.34E-02      | 9.96E-01     | 3.01E-02     | 1.07E-01      |
| Allantoin             | -0.22(0.16)   | -0.37(0.28) | -2.56(0.77) | -0.15(0.32)         | -2.34(0.79)  | -2.19(0.82)   | 6.48E-01     | 4.12E-03     | 9.30E-03      | 9.96E-01     | 4.39E-02     | 8.35E-02      |
| 3-hydroxybutyric acid | -0.04(0.18)   | 0.01(0.15)  | 1.25(0.40)  | 0.06(0.24)          | 1.29(0.44)   | 1.23(0.42)    | 8.14E-01     | 4.60E-03     | 4.65E-03      | 9.96E-01     | 4.56E-02     | 4.87E-02      |
| Creatinine            | -0.01(0.12)   | 0.03(1.00)  | -1.80(0.62) | 0.04(1.00)          | -1.79(0.63)  | -1.82(1.15)   | 9.71E-01     | 6.14E-03     | 1.19E-01      | 9.96E-01     | 5.65E-02     | 3.64E-01      |
| Glucose               | 0.36(0.17)    | 0.57(0.16)  | 0.91(0.08)  | 0.21(0.23)          | 0.54(0.19)   | 0.34(0.18)    | 3.85E-01     | 6.42E-03     | 6.79E-02      | 9.96E-01     | 5.76E-02     | 2.78E-01      |

|                                                      |             |             |             |             |             |             |          |          |          |          |          |          |
|------------------------------------------------------|-------------|-------------|-------------|-------------|-------------|-------------|----------|----------|----------|----------|----------|----------|
| Hydrocinnamic acid                                   | 0.09(0.17)  | -0.09(0.25) | -1.64(0.62) | -0.18(0.30) | -1.74(0.64) | -1.56(0.66) | 5.43E-01 | 8.31E-03 | 2.12E-02 | 9.96E-01 | 6.59E-02 | 1.48E-01 |
| Phenylalanine                                        | 0.01(0.25)  | -0.04(0.19) | -0.74(0.13) | -0.05(0.31) | -0.75(0.28) | -0.70(0.23) | 8.82E-01 | 1.07E-02 | 3.00E-03 | 9.96E-01 | 7.79E-02 | 3.33E-02 |
| Isoleucine                                           | 0.03(0.20)  | -0.08(0.21) | -0.67(0.16) | -0.11(0.29) | -0.70(0.27) | -0.58(0.27) | 7.00E-01 | 1.07E-02 | 3.25E-02 | 9.96E-01 | 7.79E-02 | 1.83E-01 |
| Cholesterol                                          | -0.21(0.32) | -0.16(0.12) | -1.33(0.33) | 0.05(0.34)  | -1.11(0.45) | -1.17(0.36) | 8.78E-01 | 1.64E-02 | 1.67E-03 | 9.96E-01 | 1.09E-01 | 2.70E-02 |
| Tagatose                                             | -0.07(0.12) | 0.89(0.76)  | 2.27(0.94)  | 0.95(0.76)  | 2.34(0.95)  | 1.39(1.20)  | 2.15E-01 | 1.70E-02 | 2.53E-01 | 9.96E-01 | 1.09E-01 | 5.53E-01 |
| Tyrosine                                             | 0.02(0.22)  | 0.16(0.20)  | -0.64(0.17) | 0.13(0.30)  | -0.66(0.28) | -0.79(0.26) | 6.56E-01 | 2.05E-02 | 3.37E-03 | 9.96E-01 | 1.29E-01 | 3.63E-02 |
| UDP GlcNAc                                           | -0.13(0.15) | 0.11(0.24)  | -0.70(0.22) | 0.24(0.29)  | -0.57(0.26) | -0.81(0.33) | 4.04E-01 | 3.34E-02 | 1.67E-02 | 9.96E-01 | 2.00E-01 | 1.24E-01 |
| 3,6-anhydro-D-galactose                              | 0.11(0.16)  | 0.43(0.27)  | 0.69(0.21)  | 0.32(0.31)  | 0.58(0.27)  | 0.26(0.34)  | 3.15E-01 | 3.47E-02 | 4.49E-01 | 9.96E-01 | 2.05E-01 | 6.93E-01 |
| Alanine                                              | 0.12(0.24)  | -0.15(0.25) | -0.46(0.15) | -0.27(0.34) | -0.58(0.28) | -0.31(0.29) | 4.31E-01 | 4.17E-02 | 2.90E-01 | 9.96E-01 | 2.22E-01 | 5.67E-01 |
| Shikimic acid                                        | 0.13(0.19)  | 0.15(0.20)  | -0.50(0.23) | 0.02(0.27)  | -0.63(0.30) | -0.65(0.30) | 9.37E-01 | 4.18E-02 | 3.24E-02 | 9.96E-01 | 2.22E-01 | 1.83E-01 |
| Glutamine                                            | 0.04(0.28)  | 0.01(0.16)  | -0.68(0.21) | -0.03(0.31) | -0.72(0.36) | -0.69(0.27) | 9.15E-01 | 4.73E-02 | 1.26E-02 | 9.96E-01 | 2.43E-01 | 1.07E-01 |
| Behenic acid                                         | -0.15(0.22) | 0.12(0.16)  | -0.71(0.19) | 0.26(0.28)  | -0.56(0.29) | -0.83(0.25) | 3.45E-01 | 5.26E-02 | 1.46E-03 | 9.96E-01 | 2.57E-01 | 2.66E-02 |
| Kynurenine                                           | -0.15(0.38) | 0.03(0.12)  | -1.15(0.35) | 0.18(0.40)  | -1.01(0.51) | -1.19(0.37) | 6.53E-01 | 5.40E-02 | 2.22E-03 | 9.96E-01 | 2.60E-01 | 2.91E-02 |
| Methionine sulfoxide                                 | 0.09(0.25)  | -0.05(0.19) | -0.51(0.18) | -0.14(0.30) | -0.59(0.31) | -0.46(0.26) | 6.55E-01 | 5.93E-02 | 8.47E-02 | 9.96E-01 | 2.76E-01 | 3.02E-01 |
| 2-hydroxypyrazinyl-2-propenoic acid ethyl ester NIST | -0.12(0.19) | -0.07(0.24) | -0.61(0.19) | 0.05(0.31)  | -0.50(0.27) | -0.55(0.31) | 8.74E-01 | 6.49E-02 | 8.00E-02 | 9.96E-01 | 2.89E-01 | 2.96E-01 |
| Glyceric acid                                        | 0.06(0.12)  | -0.31(1.35) | -1.89(1.04) | -0.38(1.36) | -1.96(1.04) | -1.58(1.73) | 7.83E-01 | 6.53E-02 | 3.62E-01 | 9.96E-01 | 2.89E-01 | 6.44E-01 |
| Trans-4-hydroxyproline                               | -0.06(0.15) | -0.29(0.30) | -0.61(0.25) | -0.23(0.33) | -0.54(0.29) | -0.32(0.39) | 4.93E-01 | 6.75E-02 | 4.24E-01 | 9.96E-01 | 2.96E-01 | 6.71E-01 |
| Beta-alanine                                         | 0.05(0.16)  | -0.05(0.31) | -0.42(0.20) | -0.10(0.35) | -0.47(0.25) | -0.37(0.37) | 7.79E-01 | 6.93E-02 | 3.15E-01 | 9.96E-01 | 2.97E-01 | 5.88E-01 |
| Conduritol-beta-expoxide                             | 0.04(0.18)  | -0.04(0.23) | -0.45(0.20) | -0.08(0.29) | -0.49(0.27) | -0.41(0.30) | 7.89E-01 | 7.18E-02 | 1.81E-01 | 9.96E-01 | 3.04E-01 | 4.68E-01 |
| Hexuronic acid                                       | -0.12(0.23) | 0.01(0.18)  | 0.53(0.27)  | 0.12(0.29)  | 0.64(0.36)  | 0.52(0.33)  | 6.81E-01 | 7.51E-02 | 1.18E-01 | 9.96E-01 | 3.11E-01 | 3.64E-01 |
| Methionine                                           | 0.10(0.48)  | 0.06(0.19)  | -0.80(0.18) | -0.04(0.50) | -0.91(0.51) | -0.87(0.26) | 9.36E-01 | 8.05E-02 | 1.61E-03 | 9.96E-01 | 3.16E-01 | 2.70E-02 |
| Oxoproline                                           | -0.29(0.22) | -0.31(0.18) | -0.74(0.15) | -0.02(0.28) | -0.45(0.26) | -0.43(0.23) | 9.54E-01 | 9.50E-02 | 6.99E-02 | 9.96E-01 | 3.43E-01 | 2.81E-01 |
| Sorbitol                                             | 0.62(1.39)  | 0.13(0.11)  | 3.50(1.00)  | -0.49(1.40) | 2.88(1.70)  | 3.37(1.01)  | 7.26E-01 | 9.54E-02 | 1.34E-03 | 9.96E-01 | 3.43E-01 | 2.65E-02 |
| 3-aminoisobutyric acid                               | -0.04(0.29) | -0.22(0.26) | -0.59(0.16) | -0.18(0.39) | -0.55(0.33) | -0.38(0.30) | 6.55E-01 | 9.76E-02 | 2.11E-01 | 9.96E-01 | 3.47E-01 | 5.14E-01 |
| Nicotinic acid                                       | 0.34(0.39)  | -1.24(1.59) | -0.33(0.12) | -1.58(1.64) | -0.67(0.40) | 0.91(1.60)  | 3.39E-01 | 1.01E-01 | 5.72E-01 | 9.96E-01 | 3.48E-01 | 8.05E-01 |

|                               |             |             |             |             |             |             |          |          |          |          |          |          |
|-------------------------------|-------------|-------------|-------------|-------------|-------------|-------------|----------|----------|----------|----------|----------|----------|
| Arachidic acid                | 0.37(0.43)  | -0.03(0.22) | -0.36(0.14) | -0.41(0.48) | -0.73(0.45) | -0.32(0.26) | 3.98E-01 | 1.07E-01 | 2.20E-01 | 9.96E-01 | 3.56E-01 | 5.16E-01 |
| Lauric acid                   | 0.05(0.19)  | -0.20(0.18) | -0.60(0.35) | -0.25(0.27) | -0.65(0.40) | -0.41(0.39) | 3.59E-01 | 1.08E-01 | 3.06E-01 | 9.96E-01 | 3.56E-01 | 5.85E-01 |
| Pentadecanoic acid            | 0.24(0.23)  | -0.21(0.26) | -0.22(0.16) | -0.45(0.35) | -0.46(0.28) | -0.01(0.31) | 2.06E-01 | 1.09E-01 | 9.66E-01 | 9.96E-01 | 3.56E-01 | 9.93E-01 |
| Hippuric acid                 | -0.01(0.14) | 0.12(0.34)  | 0.47(0.26)  | 0.13(0.38)  | 0.49(0.30)  | 0.35(0.42)  | 7.27E-01 | 1.15E-01 | 4.00E-01 | 9.96E-01 | 3.67E-01 | 6.53E-01 |
| Cysteine                      | -0.04(0.19) | 0.20(0.29)  | -0.42(0.18) | 0.24(0.34)  | -0.39(0.26) | -0.62(0.33) | 4.84E-01 | 1.38E-01 | 6.62E-02 | 9.96E-01 | 4.20E-01 | 2.78E-01 |
| 2-hydroxyglutaric acid        | 0.10(0.17)  | -0.24(0.37) | -0.27(0.19) | -0.34(0.40) | -0.37(0.25) | -0.03(0.43) | 3.97E-01 | 1.47E-01 | 9.45E-01 | 9.96E-01 | 4.27E-01 | 9.87E-01 |
| Dehydroabietic acid           | -0.18(0.33) | -0.04(0.13) | -0.90(0.38) | 0.14(0.35)  | -0.73(0.50) | -0.86(0.40) | 6.98E-01 | 1.55E-01 | 3.36E-02 | 9.96E-01 | 4.40E-01 | 1.86E-01 |
| Lactulose                     | 0.00(0.14)  | 0.40(0.31)  | 0.58(0.38)  | 0.40(0.34)  | 0.58(0.41)  | 0.18(0.49)  | 2.47E-01 | 1.56E-01 | 7.07E-01 | 9.96E-01 | 4.40E-01 | 8.98E-01 |
| Parabanic acid NIST           | -0.01(0.16) | 0.15(0.22)  | -0.51(0.31) | 0.16(0.27)  | -0.50(0.35) | -0.66(0.38) | 5.49E-01 | 1.61E-01 | 9.02E-02 | 9.96E-01 | 4.40E-01 | 3.13E-01 |
| N-acetylornithine             | 0.03(0.25)  | -0.31(0.17) | 0.67(0.38)  | -0.34(0.30) | 0.64(0.45)  | 0.98(0.42)  | 2.60E-01 | 1.63E-01 | 2.28E-02 | 9.96E-01 | 4.40E-01 | 1.56E-01 |
| Butane-2,3-diol NIST          | 0.10(0.21)  | 0.42(0.29)  | -0.32(0.22) | 0.32(0.36)  | -0.43(0.30) | -0.74(0.36) | 3.85E-01 | 1.65E-01 | 4.55E-02 | 9.96E-01 | 4.40E-01 | 2.23E-01 |
| Tocopherol alpha-             | 0.10(0.32)  | -0.18(0.15) | -0.49(0.29) | -0.28(0.36) | -0.59(0.43) | -0.31(0.33) | 4.37E-01 | 1.76E-01 | 3.45E-01 | 9.96E-01 | 4.56E-01 | 6.25E-01 |
| Urea                          | -0.20(0.17) | -0.03(0.17) | -0.83(0.43) | 0.17(0.24)  | -0.63(0.47) | -0.80(0.47) | 4.83E-01 | 1.78E-01 | 9.08E-02 | 9.96E-01 | 4.56E-01 | 3.13E-01 |
| Maltotriose                   | 0.05(0.29)  | 0.18(0.16)  | -0.42(0.19) | 0.13(0.33)  | -0.47(0.35) | -0.60(0.25) | 6.89E-01 | 1.81E-01 | 2.12E-02 | 9.96E-01 | 4.56E-01 | 1.48E-01 |
| 1-monopalmitin                | -0.13(0.29) | 0.04(0.13)  | -0.87(0.46) | 0.18(0.32)  | -0.74(0.55) | -0.92(0.48) | 5.83E-01 | 1.85E-01 | 6.12E-02 | 9.96E-01 | 4.56E-01 | 2.68E-01 |
| 2-piperidinobenzonitrile NIST | -0.13(0.21) | -0.10(0.35) | 0.24(0.17)  | 0.03(0.41)  | 0.37(0.28)  | 0.33(0.39)  | 9.35E-01 | 1.89E-01 | 3.96E-01 | 9.96E-01 | 4.56E-01 | 6.53E-01 |
| Hexitol                       | 0.09(0.15)  | 0.12(0.23)  | 0.58(0.34)  | 0.03(0.28)  | 0.49(0.37)  | 0.45(0.41)  | 9.02E-01 | 1.96E-01 | 2.79E-01 | 9.96E-01 | 4.66E-01 | 5.61E-01 |
| Salicylic acid                | -0.09(0.13) | -0.06(0.51) | -0.60(0.37) | 0.03(0.52)  | -0.51(0.39) | -0.54(0.62) | 9.49E-01 | 1.97E-01 | 3.88E-01 | 9.96E-01 | 4.66E-01 | 6.45E-01 |
| Pseudo uridine                | -0.11(0.25) | 0.03(0.28)  | -0.50(0.18) | 0.14(0.38)  | -0.39(0.30) | -0.53(0.33) | 7.12E-01 | 2.02E-01 | 1.13E-01 | 9.96E-01 | 4.71E-01 | 3.58E-01 |
| Xylitol                       | -0.75(0.41) | -0.27(0.70) | -0.22(0.13) | 0.48(0.81)  | 0.53(0.43)  | 0.05(0.71)  | 5.56E-01 | 2.28E-01 | 9.49E-01 | 9.96E-01 | 5.17E-01 | 9.87E-01 |
| Glutamic acid                 | 0.11(0.19)  | 0.14(0.22)  | -0.27(0.26) | 0.03(0.29)  | -0.38(0.33) | -0.41(0.35) | 9.22E-01 | 2.50E-01 | 2.43E-01 | 9.96E-01 | 5.54E-01 | 5.39E-01 |
| 2,4-diaminobutyric acid       | -0.05(0.18) | 0.08(0.27)  | 0.25(0.21)  | 0.13(0.32)  | 0.30(0.26)  | 0.17(0.34)  | 6.85E-01 | 2.63E-01 | 6.31E-01 | 9.96E-01 | 5.76E-01 | 8.36E-01 |
| 4-hydroxyphenylacetic acid    | 0.07(0.41)  | 0.31(0.41)  | -0.40(0.13) | 0.24(0.58)  | -0.47(0.42) | -0.71(0.43) | 6.83E-01 | 2.68E-01 | 1.04E-01 | 9.96E-01 | 5.83E-01 | 3.37E-01 |
| Nonadecanoic acid             | 0.00(0.33)  | 0.31(0.16)  | -0.41(0.19) | 0.31(0.37)  | -0.40(0.38) | -0.71(0.25) | 4.00E-01 | 2.92E-01 | 5.76E-03 | 9.96E-01 | 6.21E-01 | 5.71E-02 |



|                              |             |             |             |             |             |             |          |          |          |          |          |          |
|------------------------------|-------------|-------------|-------------|-------------|-------------|-------------|----------|----------|----------|----------|----------|----------|
| Mannose                      | -0.17(0.42) | 0.30(0.28)  | 0.30(0.13)  | 0.47(0.50)  | 0.47(0.44)  | 0.00(0.31)  | 3.54E-01 | 2.93E-01 | 9.92E-01 | 9.96E-01 | 6.21E-01 | 9.98E-01 |
| Quinic acid                  | -0.14(0.20) | 0.04(0.34)  | 0.13(0.18)  | 0.18(0.39)  | 0.27(0.27)  | 0.09(0.39)  | 6.44E-01 | 3.09E-01 | 8.16E-01 | 9.96E-01 | 6.48E-01 | 9.41E-01 |
| Pyrrole-2-carboxylic acid    | -0.20(0.21) | -0.08(0.24) | 0.09(0.20)  | 0.13(0.31)  | 0.29(0.29)  | 0.16(0.31)  | 6.85E-01 | 3.13E-01 | 6.00E-01 | 9.96E-01 | 6.51E-01 | 8.29E-01 |
| 2-hydroxyvaleric acid        | 0.00(0.22)  | 0.21(0.27)  | -0.39(0.33) | 0.21(0.35)  | -0.40(0.40) | -0.61(0.42) | 5.53E-01 | 3.28E-01 | 1.51E-01 | 9.96E-01 | 6.67E-01 | 4.24E-01 |
| Phosphate                    | -0.30(0.24) | -0.10(0.24) | -0.58(0.17) | 0.20(0.33)  | -0.28(0.28) | -0.48(0.29) | 5.50E-01 | 3.29E-01 | 9.93E-02 | 9.96E-01 | 6.67E-01 | 3.34E-01 |
| Glycolic acid                | -0.04(0.19) | -0.07(0.21) | 0.24(0.21)  | -0.03(0.29) | 0.28(0.28)  | 0.31(0.30)  | 9.24E-01 | 3.31E-01 | 3.18E-01 | 9.96E-01 | 6.67E-01 | 5.90E-01 |
| 3-(1-pyrazolyl)-L-alanine    | -0.23(0.46) | 0.04(0.12)  | -0.82(0.37) | 0.27(0.47)  | -0.59(0.60) | -0.86(0.39) | 5.78E-01 | 3.31E-01 | 3.24E-02 | 9.96E-01 | 6.67E-01 | 1.83E-01 |
| Adenosine-5-monophosphate    | -0.03(0.35) | 0.33(0.25)  | -0.39(0.14) | 0.35(0.42)  | -0.37(0.38) | -0.72(0.28) | 4.09E-01 | 3.35E-01 | 1.36E-02 | 9.96E-01 | 6.67E-01 | 1.07E-01 |
| 1,5-anhydroglucitol          | -5.70(5.46) | -1.38(0.63) | -0.50(0.11) | 4.33(5.52)  | 5.20(5.46)  | 0.88(0.64)  | 4.36E-01 | 3.44E-01 | 1.75E-01 | 9.96E-01 | 6.74E-01 | 4.63E-01 |
| Hydroxylamine                | -0.31(0.27) | -0.11(0.18) | -0.01(0.20) | 0.20(0.33)  | 0.30(0.34)  | 0.11(0.26)  | 5.44E-01 | 3.68E-01 | 6.88E-01 | 9.96E-01 | 6.94E-01 | 8.82E-01 |
| Isocitric acid               | -0.21(0.25) | -0.15(0.23) | 0.07(0.19)  | 0.06(0.34)  | 0.28(0.31)  | 0.22(0.29)  | 8.58E-01 | 3.70E-01 | 4.55E-01 | 9.96E-01 | 6.94E-01 | 6.97E-01 |
| Pipecolinic acid             | 0.19(0.23)  | 0.11(0.23)  | -0.09(0.22) | -0.07(0.32) | -0.28(0.31) | -0.21(0.32) | 8.23E-01 | 3.79E-01 | 5.18E-01 | 9.96E-01 | 7.06E-01 | 7.60E-01 |
| Asparagine                   | -0.22(0.28) | -0.14(0.22) | -0.49(0.15) | 0.08(0.34)  | -0.27(0.31) | -0.36(0.26) | 8.10E-01 | 3.84E-01 | 1.78E-01 | 9.96E-01 | 7.06E-01 | 4.63E-01 |
| Cellobiose minor             | -0.16(0.60) | 0.02(0.14)  | -0.77(0.40) | 0.18(0.61)  | -0.62(0.71) | -0.80(0.43) | 7.68E-01 | 3.85E-01 | 6.71E-02 | 9.96E-01 | 7.06E-01 | 2.78E-01 |
| Glycerol-alpha-phosphate     | 0.01(0.19)  | 0.00(0.21)  | -0.24(0.22) | -0.01(0.29) | -0.25(0.29) | -0.25(0.31) | 9.86E-01 | 3.91E-01 | 4.28E-01 | 9.96E-01 | 7.08E-01 | 6.76E-01 |
| Maltose                      | -0.24(0.82) | -0.02(0.13) | -1.22(0.81) | 0.21(0.83)  | -0.98(1.16) | -1.19(0.83) | 8.01E-01 | 4.02E-01 | 1.54E-01 | 9.96E-01 | 7.17E-01 | 4.25E-01 |
| Oleic acid                   | -0.04(0.21) | -0.17(0.34) | 0.17(0.16)  | -0.13(0.40) | 0.21(0.27)  | 0.34(0.37)  | 7.39E-01 | 4.31E-01 | 3.57E-01 | 9.96E-01 | 7.49E-01 | 6.40E-01 |
| Levogluconan                 | -0.08(0.33) | 0.10(0.18)  | 0.22(0.18)  | 0.18(0.37)  | 0.30(0.38)  | 0.12(0.26)  | 6.28E-01 | 4.31E-01 | 6.40E-01 | 9.96E-01 | 7.49E-01 | 8.36E-01 |
| 2-deoxyisotetronic acid NIST | -0.02(0.22) | -0.02(0.20) | 0.22(0.21)  | -0.00(0.31) | 0.24(0.30)  | 0.24(0.29)  | 9.89E-01 | 4.38E-01 | 4.07E-01 | 9.96E-01 | 7.52E-01 | 6.59E-01 |
| Mannitol                     | -0.04(0.15) | 0.23(0.23)  | 0.35(0.48)  | 0.26(0.27)  | 0.39(0.50)  | 0.13(0.53)  | 3.39E-01 | 4.42E-01 | 8.12E-01 | 9.96E-01 | 7.52E-01 | 9.41E-01 |
| Naproxen                     | -0.27(0.59) | 0.04(0.12)  | 3.14(4.50)  | 0.31(0.60)  | 3.42(4.55)  | 3.11(4.50)  | 6.08E-01 | 4.55E-01 | 4.92E-01 | 9.96E-01 | 7.64E-01 | 7.33E-01 |
| N-acetyl glycine NIST        | -0.14(0.43) | 0.13(0.25)  | -0.48(0.16) | 0.27(0.49)  | -0.35(0.47) | -0.61(0.29) | 5.91E-01 | 4.60E-01 | 3.80E-02 | 9.96E-01 | 7.64E-01 | 2.05E-01 |
| Linoleic acid                | -0.07(0.27) | -0.22(0.31) | 0.16(0.15)  | -0.15(0.42) | 0.22(0.31)  | 0.38(0.33)  | 7.19E-01 | 4.76E-01 | 2.66E-01 | 9.96E-01 | 7.75E-01 | 5.53E-01 |
| Ornithine                    | -0.26(0.31) | -0.24(0.23) | -0.50(0.18) | 0.01(0.37)  | -0.25(0.35) | -0.26(0.29) | 9.71E-01 | 4.81E-01 | 3.71E-01 | 9.96E-01 | 7.75E-01 | 6.45E-01 |
| Capric acid                  | -0.05(0.21) | -0.06(0.25) | -0.29(0.28) | -0.01(0.33) | -0.24(0.35) | -0.23(0.37) | 9.75E-01 | 4.93E-01 | 5.41E-01 | 9.96E-01 | 7.86E-01 | 7.79E-01 |
| N-acetylglutamate            | -0.36(0.58) | 0.07(0.13)  | 0.10(0.33)  | 0.43(0.59)  | 0.46(0.68)  | 0.03(0.35)  | 4.67E-01 | 4.94E-01 | 9.33E-01 | 9.96E-01 | 7.86E-01 | 9.87E-01 |

|                                 |             |             |             |             |             |             |          |          |          |          |          |          |
|---------------------------------|-------------|-------------|-------------|-------------|-------------|-------------|----------|----------|----------|----------|----------|----------|
| Galactose                       | -0.02(0.33) | 0.04(0.19)  | 0.22(0.17)  | 0.05(0.38)  | 0.24(0.37)  | 0.19(0.25)  | 8.88E-01 | 5.19E-01 | 4.63E-01 | 9.96E-01 | 8.06E-01 | 7.04E-01 |
| Stearic acid                    | -0.07(0.25) | 0.00(0.16)  | -0.33(0.33) | 0.08(0.30)  | -0.26(0.42) | -0.34(0.37) | 7.93E-01 | 5.36E-01 | 3.57E-01 | 9.96E-01 | 8.20E-01 | 6.40E-01 |
| Phosphoethanolamine             | -0.30(0.26) | -0.18(0.18) | -0.49(0.18) | 0.12(0.31)  | -0.19(0.31) | -0.31(0.25) | 6.93E-01 | 5.48E-01 | 2.18E-01 | 9.96E-01 | 8.30E-01 | 5.16E-01 |
| Serine                          | -0.66(0.25) | -0.31(0.25) | -0.82(0.16) | 0.35(0.33)  | -0.16(0.28) | -0.51(0.28) | 3.01E-01 | 5.64E-01 | 7.48E-02 | 9.96E-01 | 8.37E-01 | 2.94E-01 |
| Uridine                         | -0.04(0.21) | -0.18(0.20) | -0.20(0.21) | -0.14(0.29) | -0.16(0.30) | -0.02(0.29) | 6.24E-01 | 5.88E-01 | 9.50E-01 | 9.96E-01 | 8.56E-01 | 9.87E-01 |
| Fumaric acid                    | -0.05(0.14) | -0.24(0.47) | 0.15(0.34)  | -0.19(0.49) | 0.20(0.37)  | 0.39(0.58)  | 6.92E-01 | 5.95E-01 | 4.99E-01 | 9.96E-01 | 8.57E-01 | 7.40E-01 |
| Heptadecanoic acid              | -0.03(0.21) | 0.03(0.17)  | -0.23(0.33) | 0.06(0.27)  | -0.20(0.39) | -0.26(0.37) | 8.30E-01 | 6.06E-01 | 4.83E-01 | 9.96E-01 | 8.69E-01 | 7.23E-01 |
| Deoxycholic acid                | 0.01(0.38)  | -0.12(0.40) | 0.22(0.14)  | -0.13(0.55) | 0.21(0.41)  | 0.33(0.43)  | 8.22E-01 | 6.10E-01 | 4.38E-01 | 9.96E-01 | 8.71E-01 | 6.88E-01 |
| N-acetylmannosamine             | -0.05(0.29) | 0.01(0.14)  | 0.21(0.45)  | 0.06(0.33)  | 0.27(0.53)  | 0.21(0.47)  | 8.57E-01 | 6.19E-01 | 6.60E-01 | 9.96E-01 | 8.78E-01 | 8.55E-01 |
| Cystine                         | -0.02(0.47) | 0.06(0.14)  | 0.24(0.27)  | 0.08(0.49)  | 0.27(0.54)  | 0.19(0.30)  | 8.75E-01 | 6.22E-01 | 5.34E-01 | 9.96E-01 | 8.78E-01 | 7.75E-01 |
| Lysine                          | -0.03(0.48) | 0.01(0.19)  | -0.28(0.19) | 0.04(0.51)  | -0.25(0.51) | -0.29(0.26) | 9.37E-01 | 6.29E-01 | 2.75E-01 | 9.96E-01 | 8.79E-01 | 5.60E-01 |
| Myo-inositol                    | 0.00(0.36)  | -0.10(0.22) | -0.19(0.17) | -0.10(0.42) | -0.18(0.39) | -0.09(0.28) | 8.18E-01 | 6.36E-01 | 7.62E-01 | 9.96E-01 | 8.79E-01 | 9.23E-01 |
| Galactonic acid                 | 0.16(0.45)  | -0.02(0.16) | 0.37(0.18)  | -0.18(0.47) | 0.22(0.48)  | 0.39(0.24)  | 7.07E-01 | 6.55E-01 | 1.03E-01 | 9.96E-01 | 8.94E-01 | 3.37E-01 |
| Erythritol                      | -0.06(0.78) | 0.25(0.67)  | 0.29(0.12)  | 0.31(1.03)  | 0.35(0.79)  | 0.04(0.68)  | 7.66E-01 | 6.61E-01 | 9.54E-01 | 9.96E-01 | 8.94E-01 | 9.87E-01 |
| Pinitol                         | -0.45(0.57) | -0.25(0.19) | -0.72(0.21) | 0.20(0.60)  | -0.26(0.60) | -0.46(0.28) | 7.38E-01 | 6.66E-01 | 1.07E-01 | 9.96E-01 | 8.94E-01 | 3.45E-01 |
| Sucrose                         | -0.11(0.21) | -0.08(0.15) | -0.43(0.72) | 0.03(0.26)  | -0.32(0.75) | -0.35(0.74) | 9.22E-01 | 6.68E-01 | 6.38E-01 | 9.96E-01 | 8.94E-01 | 8.36E-01 |
| Myristic acid                   | -0.09(0.19) | -0.08(0.19) | -0.23(0.25) | 0.02(0.27)  | -0.13(0.31) | -0.15(0.32) | 9.45E-01 | 6.72E-01 | 6.32E-01 | 9.96E-01 | 8.94E-01 | 8.36E-01 |
| Aconitic acid                   | 0.10(0.39)  | -0.43(0.34) | 0.28(0.14)  | -0.53(0.52) | 0.17(0.41)  | 0.71(0.37)  | 3.09E-01 | 6.74E-01 | 5.88E-02 | 9.96E-01 | 8.94E-01 | 2.63E-01 |
| 2-hydroxybutanoic acid          | 0.35(0.43)  | 0.22(0.29)  | 0.16(0.14)  | -0.13(0.54) | -0.19(0.45) | -0.05(0.32) | 8.02E-01 | 6.77E-01 | 8.67E-01 | 9.96E-01 | 8.94E-01 | 9.61E-01 |
| Acetaminophen                   | -0.28(0.51) | 0.32(0.48)  | -0.06(0.13) | 0.61(0.71)  | 0.22(0.53)  | -0.39(0.50) | 3.94E-01 | 6.77E-01 | 4.42E-01 | 9.96E-01 | 8.94E-01 | 6.89E-01 |
| Phenylethylamine                | 0.11(0.27)  | 0.01(0.24)  | 0.24(0.17)  | -0.10(0.36) | 0.13(0.31)  | 0.23(0.29)  | 7.87E-01 | 6.80E-01 | 4.42E-01 | 9.96E-01 | 8.94E-01 | 6.89E-01 |
| Citric acid                     | -0.37(0.29) | -0.16(0.24) | -0.23(0.19) | 0.21(0.38)  | 0.14(0.35)  | -0.07(0.30) | 5.84E-01 | 6.95E-01 | 8.08E-01 | 9.96E-01 | 9.02E-01 | 9.41E-01 |
| Palmitoleic acid                | 0.00(0.17)  | -0.01(0.36) | 0.10(0.19)  | -0.01(0.40) | 0.10(0.26)  | 0.11(0.40)  | 9.87E-01 | 6.98E-01 | 7.93E-01 | 9.96E-01 | 9.02E-01 | 9.37E-01 |
| Arachidonic acid                | -0.17(0.42) | 0.43(0.47)  | 0.00(0.13)  | 0.60(0.62)  | 0.17(0.45)  | -0.43(0.49) | 3.36E-01 | 7.02E-01 | 3.81E-01 | 9.96E-01 | 9.02E-01 | 6.45E-01 |
| 2,3-dihydroxybutanoic acid NIST | -0.16(0.23) | -0.02(0.24) | -0.27(0.18) | 0.15(0.32)  | -0.11(0.28) | -0.25(0.29) | 6.49E-01 | 7.10E-01 | 3.82E-01 | 9.96E-01 | 9.02E-01 | 6.45E-01 |
| Aspartic acid                   | -0.21(0.23) | -0.01(0.28) | -0.31(0.18) | 0.19(0.36)  | -0.10(0.29) | -0.30(0.34) | 5.87E-01 | 7.23E-01 | 3.80E-01 | 9.96E-01 | 9.02E-01 | 6.45E-01 |

|                                  |             |             |             |             |             |             |          |          |          |          |          |          |
|----------------------------------|-------------|-------------|-------------|-------------|-------------|-------------|----------|----------|----------|----------|----------|----------|
| Palmitic acid                    | -0.12(0.22) | 0.01(0.18)  | 0.00(0.27)  | 0.14(0.28)  | 0.12(0.35)  | -0.02(0.33) | 6.27E-01 | 7.31E-01 | 9.58E-01 | 9.96E-01 | 9.02E-01 | 9.87E-01 |
| Indole-3-acetate                 | -0.07(0.47) | -0.24(0.34) | 0.09(0.15)  | -0.16(0.59) | 0.17(0.49)  | 0.33(0.38)  | 7.81E-01 | 7.37E-01 | 3.85E-01 | 9.96E-01 | 9.02E-01 | 6.45E-01 |
| Ketohexose                       | 0.03(0.15)  | -0.05(0.24) | 0.16(0.35)  | -0.08(0.28) | 0.13(0.38)  | 0.20(0.42)  | 7.87E-01 | 7.38E-01 | 6.26E-01 | 9.96E-01 | 9.02E-01 | 8.36E-01 |
| Isothreonic acid                 | 0.08(0.21)  | -0.29(0.28) | 0.17(0.18)  | -0.36(0.34) | 0.09(0.28)  | 0.45(0.34)  | 2.95E-01 | 7.48E-01 | 1.86E-01 | 9.96E-01 | 9.02E-01 | 4.78E-01 |
| Isothreitol                      | -0.14(0.28) | -0.80(0.50) | -0.24(0.14) | -0.66(0.57) | -0.10(0.31) | 0.57(0.52)  | 2.45E-01 | 7.54E-01 | 2.82E-01 | 9.96E-01 | 9.02E-01 | 5.61E-01 |
| Allantoic acid                   | -0.10(0.50) | 0.22(0.20)  | -0.27(0.24) | 0.31(0.54)  | -0.17(0.55) | -0.49(0.31) | 5.63E-01 | 7.57E-01 | 1.17E-01 | 9.96E-01 | 9.02E-01 | 3.64E-01 |
| Tryptophan                       | 0.06(1.65)  | 0.02(0.12)  | -0.57(1.17) | -0.04(1.65) | -0.63(2.04) | -0.59(1.18) | 9.82E-01 | 7.59E-01 | 6.18E-01 | 9.96E-01 | 9.02E-01 | 8.36E-01 |
| Cysteine-glycine                 | -0.10(0.38) | -0.08(0.19) | 0.02(0.19)  | 0.02(0.42)  | 0.12(0.42)  | 0.10(0.27)  | 9.66E-01 | 7.69E-01 | 6.99E-01 | 9.96E-01 | 9.02E-01 | 8.93E-01 |
| Ethanolamine                     | -0.15(0.39) | -0.42(0.41) | -0.04(0.14) | -0.27(0.56) | 0.11(0.42)  | 0.38(0.43)  | 6.32E-01 | 7.89E-01 | 3.83E-01 | 9.96E-01 | 9.09E-01 | 6.45E-01 |
| Fucose                           | 0.33(0.86)  | 0.02(0.13)  | 0.09(0.31)  | -0.31(0.88) | -0.24(0.92) | 0.07(0.34)  | 7.22E-01 | 7.91E-01 | 8.40E-01 | 9.96E-01 | 9.09E-01 | 9.51E-01 |
| Lyxitol                          | -0.06(0.15) | 0.02(0.97)  | 0.02(0.25)  | 0.07(0.99)  | 0.07(0.28)  | 0.00(1.00)  | 9.42E-01 | 7.92E-01 | 9.98E-01 | 9.96E-01 | 9.09E-01 | 9.98E-01 |
| Uric acid                        | 0.14(0.43)  | 0.09(0.24)  | 0.26(0.16)  | -0.04(0.50) | 0.12(0.46)  | 0.16(0.29)  | 9.33E-01 | 7.93E-01 | 5.76E-01 | 9.96E-01 | 9.09E-01 | 8.07E-01 |
| Oxamic acid                      | -0.02(0.12) | 1.60(3.66)  | -1.01(3.80) | 1.62(3.66)  | -0.98(3.80) | -2.60(5.41) | 6.61E-01 | 7.96E-01 | 6.32E-01 | 9.96E-01 | 9.10E-01 | 8.36E-01 |
| Tocopherol<br>gamma-             | -0.12(0.27) | -0.18(0.15) | -0.29(0.64) | -0.06(0.31) | -0.17(0.70) | -0.11(0.65) | 8.52E-01 | 8.06E-01 | 8.62E-01 | 9.96E-01 | 9.12E-01 | 9.61E-01 |
| Malic acid                       | -0.31(0.23) | 0.11(0.19)  | -0.38(0.20) | 0.42(0.31)  | -0.07(0.30) | -0.49(0.29) | 1.76E-01 | 8.10E-01 | 9.20E-02 | 9.96E-01 | 9.14E-01 | 3.13E-01 |
| 2-deoxytetronic<br>acid          | -0.23(0.30) | -0.25(0.25) | -0.31(0.15) | -0.01(0.39) | -0.08(0.34) | -0.06(0.29) | 9.72E-01 | 8.18E-01 | 8.25E-01 | 9.96E-01 | 9.15E-01 | 9.49E-01 |
| Arabitol                         | -0.22(0.22) | 0.18(0.31)  | -0.17(0.16) | 0.40(0.39)  | 0.05(0.28)  | -0.35(0.34) | 3.10E-01 | 8.56E-01 | 3.15E-01 | 9.96E-01 | 9.43E-01 | 5.88E-01 |
| Methanolphospha<br>te            | -0.07(0.33) | -0.02(0.24) | -0.13(0.15) | 0.04(0.40)  | -0.06(0.36) | -0.10(0.29) | 9.19E-01 | 8.69E-01 | 7.24E-01 | 9.96E-01 | 9.46E-01 | 9.01E-01 |
| N-methylalanine                  | -0.10(0.37) | 0.11(0.22)  | -0.04(0.16) | 0.21(0.44)  | 0.07(0.41)  | -0.14(0.27) | 6.32E-01 | 8.70E-01 | 5.99E-01 | 9.96E-01 | 9.46E-01 | 8.29E-01 |
| Hydroxyproline<br>dipeptide NIST | -0.47(0.73) | -0.52(0.46) | -0.37(0.13) | -0.05(0.87) | 0.10(0.74)  | 0.16(0.49)  | 9.50E-01 | 8.89E-01 | 7.45E-01 | 9.96E-01 | 9.53E-01 | 9.10E-01 |
| Glycerol                         | 0.03(0.21)  | -0.07(0.21) | 0.07(0.20)  | -0.10(0.30) | 0.03(0.29)  | 0.14(0.29)  | 7.27E-01 | 9.11E-01 | 6.37E-01 | 9.96E-01 | 9.73E-01 | 8.36E-01 |
| Ribonic acid                     | 0.00(0.20)  | -0.10(0.33) | 0.03(0.30)  | -0.10(0.38) | 0.03(0.36)  | 0.13(0.44)  | 7.92E-01 | 9.37E-01 | 7.67E-01 | 9.96E-01 | 9.80E-01 | 9.23E-01 |
| Alloxanoic acid<br>NIST          | -0.13(0.15) | -0.06(0.37) | -0.16(0.50) | 0.07(0.40)  | -0.04(0.51) | -0.11(0.62) | 8.61E-01 | 9.44E-01 | 8.65E-01 | 9.96E-01 | 9.83E-01 | 9.61E-01 |
| Succinic acid                    | -0.11(0.26) | -0.04(0.26) | -0.09(0.22) | 0.07(0.37)  | 0.02(0.34)  | -0.05(0.34) | 8.50E-01 | 9.51E-01 | 8.86E-01 | 9.96E-01 | 9.86E-01 | 9.68E-01 |
| Oxalic acid                      | -0.14(0.22) | 0.18(0.20)  | -0.15(0.21) | 0.32(0.30)  | -0.01(0.30) | -0.33(0.29) | 2.95E-01 | 9.76E-01 | 2.68E-01 | 9.96E-01 | 9.99E-01 | 5.56E-01 |
| Pyruvic acid                     | -0.10(0.28) | -0.06(0.19) | -0.10(0.18) | 0.04(0.34)  | -0.01(0.33) | -0.05(0.26) | 9.10E-01 | 9.80E-01 | 8.60E-01 | 9.96E-01 | 9.99E-01 | 9.61E-01 |
| Lactic acid                      | 0.00(0.16)  | -0.22(0.33) | -0.01(0.28) | -0.22(0.37) | -0.01(0.32) | 0.21(0.44)  | 5.56E-01 | 9.85E-01 | 6.27E-01 | 9.96E-01 | 1.00E+0  | 8.36E-01 |
| Threonic acid                    | -0.09(0.26) | -0.05(0.20) | -0.09(0.21) | 0.04(0.34)  | 0.00(0.32)  | -0.04(0.29) | 9.11E-01 | 9.92E-01 | 8.90E-01 | 9.96E-01 | 1.00E+0  | 9.69E-01 |

|                |             |             |              |             |              |              |          |          |          |          |          |          |
|----------------|-------------|-------------|--------------|-------------|--------------|--------------|----------|----------|----------|----------|----------|----------|
| Histidine      | -0.21(0.95) | 0.05(0.17)  | -0.20(0.21)  | 0.26(0.96)  | 0.01(0.96)   | -0.25(0.27)  | 7.89E-01 | 9.96E-01 | 3.58E-01 | 9.96E-01 | 1.00E+0  | 6.40E-01 |
| Taurine        | 0.02(0.86)  | -0.54(0.70) | 0.03(0.13)   | -0.56(1.09) | 0.00(0.86)   | 0.56(0.70)   | 6.10E-01 | 9.98E-01 | 4.23E-01 | 9.96E-01 | 1.00E+0  | 6.71E-01 |
| <b>Unknown</b> |             |             |              |             |              |              |          |          |          |          |          |          |
| 135869         | 0.11(0.10)  | 0.21(0.14)  | 2.07(0.15)   | 0.10(0.17)  | 1.96(0.19)   | 1.86(0.21)   | 5.44E-01 | 1.56E-15 | 1.36E-12 | 9.96E-01 | 5.86E-13 | 5.14E-10 |
| 7403           | -0.05(0.27) | -0.14(0.25) | -5.80(1.18)  | -0.09(0.37) | -5.76(1.24)  | -5.66(1.20)  | 7.99E-01 | 1.67E-05 | 1.35E-05 | 9.96E-01 | 1.57E-03 | 1.27E-03 |
| 8270           | 0.06(0.14)  | 0.16(0.17)  | 1.30(0.24)   | 0.10(0.22)  | 1.24(0.28)   | 1.14(0.30)   | 6.39E-01 | 3.16E-05 | 3.71E-04 | 9.96E-01 | 1.98E-03 | 1.17E-02 |
| 21666          | 0.13(0.12)  | 0.10(0.28)  | -1.38(0.33)  | -0.03(0.31) | -1.51(0.35)  | -1.48(0.43)  | 9.29E-01 | 6.27E-05 | 1.10E-03 | 9.96E-01 | 2.67E-03 | 2.30E-02 |
| 95550          | -0.06(0.16) | 0.09(0.20)  | -0.98(0.14)  | 0.15(0.25)  | -0.91(0.21)  | -1.07(0.25)  | 5.52E-01 | 6.37E-05 | 6.80E-05 | 9.96E-01 | 2.67E-03 | 3.21E-03 |
| 41683          | 0.13(0.15)  | 0.85(0.33)  | 0.95(0.15)   | 0.72(0.36)  | 0.81(0.21)   | 0.10(0.37)   | 5.00E-02 | 2.11E-04 | 7.90E-01 | 9.96E-01 | 4.97E-03 | 9.36E-01 |
| 1148           | 0.05(0.16)  | 0.16(0.16)  | -1.99(0.57)  | 0.10(0.23)  | -2.04(0.59)  | -2.15(0.59)  | 6.47E-01 | 9.95E-04 | 5.19E-04 | 9.96E-01 | 2.08E-02 | 1.50E-02 |
| 64546          | 0.43(0.14)  | 0.54(0.15)  | 0.96(0.07)   | 0.11(0.20)  | 0.53(0.16)   | 0.42(0.16)   | 5.87E-01 | 1.37E-03 | 1.29E-02 | 9.96E-01 | 2.37E-02 | 1.07E-01 |
| 7440           | -0.24(0.14) | -0.52(0.30) | -7.47(2.15)  | -0.28(0.32) | -7.24(2.16)  | -6.95(2.18)  | 3.78E-01 | 1.37E-03 | 2.18E-03 | 9.96E-01 | 2.37E-02 | 2.91E-02 |
| 6646           | 0.21(0.20)  | 0.52(0.17)  | 0.92(0.08)   | 0.30(0.27)  | 0.71(0.21)   | 0.40(0.19)   | 2.64E-01 | 1.62E-03 | 4.19E-02 | 9.96E-01 | 2.37E-02 | 2.14E-01 |
| 915            | -0.07(0.17) | -0.20(0.48) | -7.38(2.23)  | -0.13(0.51) | -7.31(2.23)  | -7.18(2.28)  | 8.00E-01 | 1.67E-03 | 2.44E-03 | 9.96E-01 | 2.37E-02 | 2.96E-02 |
| 9320           | 0.12(0.12)  | -0.63(0.34) | -0.92(0.29)  | -0.75(0.37) | -1.04(0.32)  | -0.29(0.45)  | 4.38E-02 | 1.72E-03 | 5.21E-01 | 9.96E-01 | 2.37E-02 | 7.62E-01 |
| 5419           | -0.08(0.18) | -0.02(0.21) | -1.33(0.34)  | 0.06(0.28)  | -1.25(0.38)  | -1.31(0.40)  | 8.16E-01 | 1.81E-03 | 1.92E-03 | 9.96E-01 | 2.37E-02 | 2.89E-02 |
| 4546           | 0.30(0.16)  | 0.58(0.27)  | 1.58(0.36)   | 0.28(0.31)  | 1.27(0.39)   | 0.99(0.45)   | 3.75E-01 | 1.89E-03 | 2.90E-02 | 9.96E-01 | 2.37E-02 | 1.80E-01 |
| 1941           | -0.18(0.18) | 0.10(0.20)  | -0.91(0.14)  | 0.29(0.27)  | -0.73(0.23)  | -1.02(0.24)  | 2.88E-01 | 1.97E-03 | 9.92E-05 | 9.96E-01 | 2.37E-02 | 4.16E-03 |
| 1029           | -0.21(0.18) | 0.01(0.20)  | -0.98(0.17)  | 0.21(0.25)  | -0.77(0.24)  | -0.99(0.25)  | 4.02E-01 | 1.99E-03 | 2.12E-04 | 9.96E-01 | 2.37E-02 | 7.99E-03 |
| 257            | 0.04(0.14)  | -0.27(0.38) | -0.75(0.23)  | -0.31(0.40) | -0.79(0.27)  | -0.48(0.45)  | 4.47E-01 | 4.19E-03 | 2.85E-01 | 9.96E-01 | 4.39E-02 | 5.61E-01 |
| 4943           | -0.09(0.20) | 0.25(0.22)  | 0.65(0.15)   | 0.35(0.29)  | 0.74(0.25)   | 0.39(0.26)   | 2.44E-01 | 4.52E-03 | 1.34E-01 | 9.96E-01 | 4.56E-02 | 3.95E-01 |
| 132379         | -0.07(0.23) | -0.07(0.20) | -0.87(0.16)  | -0.00(0.30) | -0.80(0.28)  | -0.80(0.25)  | 9.91E-01 | 5.64E-03 | 2.54E-03 | 9.96E-01 | 5.46E-02 | 2.99E-02 |
| 1700           | 0.01(0.16)  | -0.18(0.23) | -0.92(0.28)  | -0.19(0.28) | -0.93(0.33)  | -0.74(0.37)  | 4.96E-01 | 5.91E-03 | 4.99E-02 | 9.96E-01 | 5.57E-02 | 2.36E-01 |
| 20903          | -0.06(0.19) | 0.14(0.20)  | -0.87(0.23)  | 0.20(0.27)  | -0.81(0.29)  | -1.01(0.29)  | 4.64E-01 | 7.21E-03 | 9.62E-04 | 9.96E-01 | 6.23E-02 | 2.13E-02 |
| 16550          | -0.18(0.17) | -0.39(0.23) | -0.81(0.15)  | -0.21(0.29) | -0.63(0.23)  | -0.42(0.27)  | 4.73E-01 | 7.27E-03 | 1.31E-01 | 9.96E-01 | 6.23E-02 | 3.89E-01 |
| 4985           | 0.07(0.13)  | -1.88(1.83) | -13.52(4.94) | -1.96(1.84) | -13.59(4.95) | -11.63(5.25) | 2.90E-01 | 7.77E-03 | 3.04E-02 | 9.96E-01 | 6.51E-02 | 1.83E-01 |
| 106629         | 0.04(0.14)  | -0.74(0.90) | -0.84(0.29)  | -0.79(0.92) | -0.88(0.32)  | -0.10(0.93)  | 3.94E-01 | 8.34E-03 | 9.17E-01 | 9.96E-01 | 6.59E-02 | 9.82E-01 |
| 5346           | -0.03(0.13) | -0.23(0.35) | -0.85(0.27)  | -0.21(0.37) | -0.82(0.30)  | -0.62(0.44)  | 5.79E-01 | 8.39E-03 | 1.66E-01 | 9.96E-01 | 6.59E-02 | 4.46E-01 |
| 4887           | 0.06(0.21)  | -0.12(0.15) | -1.47(0.53)  | -0.18(0.26) | -1.53(0.57)  | -1.35(0.55)  | 4.95E-01 | 9.50E-03 | 1.62E-02 | 9.96E-01 | 7.31E-02 | 1.24E-01 |
| 135260         | -0.08(0.15) | -0.47(0.23) | -0.79(0.22)  | -0.39(0.28) | -0.72(0.27)  | -0.33(0.32)  | 1.63E-01 | 9.77E-03 | 3.14E-01 | 9.96E-01 | 7.37E-02 | 5.88E-01 |

|        |             |             |             |             |             |             |          |          |          |          |          |          |
|--------|-------------|-------------|-------------|-------------|-------------|-------------|----------|----------|----------|----------|----------|----------|
| 1912   | 0.02(0.26)  | 0.05(0.13)  | -1.01(0.32) | 0.03(0.29)  | -1.03(0.41) | -1.07(0.35) | 9.04E-01 | 1.36E-02 | 2.98E-03 | 9.96E-01 | 9.66E-02 | 3.33E-02 |
| 6353   | -0.09(0.14) | 0.04(0.36)  | -0.97(0.32) | 0.13(0.39)  | -0.88(0.35) | -1.01(0.48) | 7.37E-01 | 1.40E-02 | 3.81E-02 | 9.96E-01 | 9.76E-02 | 2.05E-01 |
| 4929   | 0.01(0.19)  | -0.12(0.16) | -1.45(0.56) | -0.14(0.25) | -1.46(0.59) | -1.32(0.57) | 5.72E-01 | 1.58E-02 | 2.35E-02 | 9.96E-01 | 1.08E-01 | 1.58E-01 |
| 41682  | -0.14(0.16) | 0.10(0.20)  | 0.72(0.31)  | 0.25(0.25)  | 0.87(0.35)  | 0.62(0.37)  | 3.36E-01 | 1.66E-02 | 1.01E-01 | 9.96E-01 | 1.09E-01 | 3.37E-01 |
| 5483   | 0.05(0.20)  | -0.10(0.19) | -0.65(0.21) | -0.15(0.27) | -0.70(0.29) | -0.55(0.29) | 5.93E-01 | 1.68E-02 | 5.77E-02 | 9.96E-01 | 1.09E-01 | 2.62E-01 |
| 5900   | -0.08(0.16) | -0.03(0.23) | -0.74(0.23) | 0.06(0.28)  | -0.65(0.28) | -0.71(0.32) | 8.44E-01 | 2.13E-02 | 3.12E-02 | 9.96E-01 | 1.32E-01 | 1.83E-01 |
| 131620 | -0.29(0.22) | 0.12(0.21)  | -0.83(0.12) | 0.40(0.30)  | -0.54(0.25) | -0.94(0.24) | 1.82E-01 | 3.26E-02 | 2.47E-04 | 9.96E-01 | 1.98E-01 | 8.45E-03 |
| 62433  | -0.10(0.17) | -0.28(0.23) | -0.66(0.20) | -0.19(0.28) | -0.56(0.26) | -0.38(0.29) | 5.10E-01 | 3.58E-02 | 1.97E-01 | 9.96E-01 | 2.08E-01 | 4.96E-01 |
| 17537  | 0.03(0.14)  | -0.03(0.43) | -0.67(0.29) | -0.06(0.44) | -0.70(0.33) | -0.64(0.52) | 8.89E-01 | 3.71E-02 | 2.27E-01 | 9.96E-01 | 2.12E-01 | 5.16E-01 |
| 473    | -0.13(0.15) | 0.23(0.78)  | 0.46(0.26)  | 0.37(0.80)  | 0.59(0.28)  | 0.22(0.82)  | 6.45E-01 | 3.82E-02 | 7.87E-01 | 9.96E-01 | 2.15E-01 | 9.36E-01 |
| 2061   | -0.16(0.18) | -0.09(0.25) | -0.71(0.18) | 0.08(0.30)  | -0.54(0.26) | -0.62(0.31) | 7.98E-01 | 3.97E-02 | 4.64E-02 | 9.96E-01 | 2.19E-01 | 2.24E-01 |
| 4945   | -0.05(0.14) | -0.07(0.32) | -0.76(0.31) | -0.02(0.35) | -0.71(0.34) | -0.69(0.44) | 9.54E-01 | 4.00E-02 | 1.24E-01 | 9.96E-01 | 2.19E-01 | 3.75E-01 |
| 132414 | 0.04(0.72)  | -0.06(0.12) | 2.25(0.79)  | -0.10(0.72) | 2.21(1.07)  | 2.31(0.80)  | 8.91E-01 | 4.31E-02 | 5.45E-03 | 9.96E-01 | 2.26E-01 | 5.56E-02 |
| 132976 | 0.24(0.23)  | 0.05(0.29)  | -0.31(0.15) | -0.19(0.37) | -0.55(0.27) | -0.36(0.33) | 6.05E-01 | 4.77E-02 | 2.74E-01 | 9.96E-01 | 2.43E-01 | 5.60E-01 |
| 2001   | 0.11(0.13)  | 0.35(0.70)  | -0.87(0.47) | 0.24(0.71)  | -0.97(0.49) | -1.22(0.85) | 7.33E-01 | 5.04E-02 | 1.56E-01 | 9.96E-01 | 2.53E-01 | 4.25E-01 |
| 117171 | -0.08(0.20) | 0.21(0.23)  | -0.59(0.17) | 0.29(0.31)  | -0.51(0.26) | -0.80(0.29) | 3.52E-01 | 5.23E-02 | 7.09E-03 | 9.96E-01 | 2.57E-01 | 6.52E-02 |
| 91     | -0.08(0.21) | -0.04(0.17) | -0.70(0.24) | 0.03(0.27)  | -0.62(0.32) | -0.66(0.29) | 9.01E-01 | 5.46E-02 | 2.76E-02 | 9.96E-01 | 2.60E-01 | 1.80E-01 |
| 41689  | -0.16(0.28) | 0.02(0.23)  | 0.45(0.17)  | 0.18(0.36)  | 0.61(0.32)  | 0.43(0.28)  | 6.20E-01 | 5.85E-02 | 1.25E-01 | 9.96E-01 | 2.76E-01 | 3.75E-01 |
| 453    | 0.22(0.79)  | -0.02(0.12) | -1.77(0.68) | -0.24(0.80) | -1.99(1.05) | -1.75(0.69) | 7.67E-01 | 6.24E-02 | 1.33E-02 | 9.96E-01 | 2.87E-01 | 1.07E-01 |
| 54     | 0.06(0.21)  | 0.00(0.19)  | -0.49(0.20) | -0.06(0.28) | -0.55(0.29) | -0.49(0.27) | 8.20E-01 | 6.42E-02 | 7.97E-02 | 9.96E-01 | 2.89E-01 | 2.96E-01 |
| 17664  | -0.05(0.37) | 0.02(0.14)  | 0.88(0.32)  | 0.07(0.40)  | 0.93(0.50)  | 0.86(0.35)  | 8.55E-01 | 6.84E-02 | 1.66E-02 | 9.96E-01 | 2.96E-01 | 1.24E-01 |
| 87756  | -0.12(0.20) | -0.13(0.26) | -0.59(0.16) | -0.01(0.33) | -0.47(0.26) | -0.46(0.31) | 9.77E-01 | 7.26E-02 | 1.39E-01 | 9.96E-01 | 3.04E-01 | 4.04E-01 |
| 657    | 0.00(0.33)  | 0.14(0.15)  | 0.70(0.21)  | 0.14(0.36)  | 0.70(0.39)  | 0.56(0.25)  | 6.97E-01 | 7.73E-02 | 2.90E-02 | 9.96E-01 | 3.16E-01 | 1.80E-01 |
| 139467 | -0.14(0.17) | 0.46(0.21)  | 1.03(0.65)  | 0.59(0.26)  | 1.17(0.66)  | 0.58(0.68)  | 2.64E-02 | 7.99E-02 | 3.98E-01 | 9.96E-01 | 3.16E-01 | 6.53E-01 |
| 159824 | 0.08(0.19)  | 0.01(0.18)  | -0.52(0.27) | -0.07(0.25) | -0.60(0.34) | -0.53(0.34) | 7.82E-01 | 8.01E-02 | 1.24E-01 | 9.96E-01 | 3.16E-01 | 3.75E-01 |
| 17651  | 0.00(0.19)  | -0.17(0.26) | 0.44(0.17)  | -0.17(0.34) | 0.44(0.25)  | 0.61(0.32)  | 6.31E-01 | 8.31E-02 | 6.21E-02 | 9.96E-01 | 3.23E-01 | 2.69E-01 |
| 4927   | -0.16(0.14) | 0.09(0.28)  | -0.82(0.35) | 0.25(0.32)  | -0.66(0.38) | -0.91(0.46) | 4.43E-01 | 8.63E-02 | 5.51E-02 | 9.96E-01 | 3.32E-01 | 2.57E-01 |
| 106634 | -0.12(0.17) | -0.15(0.27) | 0.35(0.21)  | -0.03(0.32) | 0.47(0.27)  | 0.50(0.34)  | 9.22E-01 | 8.79E-02 | 1.50E-01 | 9.96E-01 | 3.35E-01 | 4.24E-01 |
| 126397 | -0.03(0.21) | -0.07(0.28) | -0.50(0.17) | -0.04(0.33) | -0.47(0.27) | -0.43(0.32) | 9.04E-01 | 8.93E-02 | 1.90E-01 | 9.96E-01 | 3.37E-01 | 4.80E-01 |
| 592    | 0.07(0.18)  | -0.25(0.41) | -0.38(0.20) | -0.32(0.45) | -0.45(0.27) | -0.14(0.46) | 4.83E-01 | 9.43E-02 | 7.69E-01 | 9.96E-01 | 3.43E-01 | 9.23E-01 |

|        |             |             |             |             |             |             |          |          |          |          |          |          |
|--------|-------------|-------------|-------------|-------------|-------------|-------------|----------|----------|----------|----------|----------|----------|
| 135610 | 0.07(0.24)  | 0.67(0.42)  | 0.51(0.13)  | 0.60(0.49)  | 0.44(0.26)  | -0.16(0.44) | 2.20E-01 | 9.50E-02 | 7.12E-01 | 9.96E-01 | 3.43E-01 | 8.98E-01 |
| 16792  | 0.11(0.23)  | 0.32(0.18)  | 0.61(0.19)  | 0.21(0.30)  | 0.50(0.30)  | 0.30(0.26)  | 4.90E-01 | 9.54E-02 | 2.63E-01 | 9.96E-01 | 3.43E-01 | 5.53E-01 |
| 1725   | 0.00(0.16)  | -0.01(0.24) | -0.56(0.30) | -0.01(0.28) | -0.56(0.34) | -0.55(0.38) | 9.70E-01 | 9.90E-02 | 1.52E-01 | 9.96E-01 | 3.48E-01 | 4.24E-01 |
| 4981   | -0.08(0.16) | 0.02(0.26)  | 0.61(0.38)  | 0.10(0.30)  | 0.69(0.41)  | 0.59(0.46)  | 7.30E-01 | 1.00E-01 | 2.07E-01 | 9.96E-01 | 3.48E-01 | 5.14E-01 |
| 3329   | -0.10(0.24) | -0.10(0.20) | -0.64(0.22) | -0.00(0.31) | -0.54(0.32) | -0.54(0.30) | 9.96E-01 | 1.03E-01 | 7.65E-02 | 9.96E-01 | 3.53E-01 | 2.96E-01 |
| 6526   | -0.07(0.16) | 0.21(0.26)  | 0.43(0.27)  | 0.29(0.31)  | 0.50(0.31)  | 0.22(0.38)  | 3.53E-01 | 1.07E-01 | 5.69E-01 | 9.96E-01 | 3.56E-01 | 8.05E-01 |
| 6538   | 0.08(0.29)  | 0.08(0.18)  | -0.52(0.23) | -0.00(0.34) | -0.60(0.37) | -0.59(0.28) | 9.92E-01 | 1.08E-01 | 4.10E-02 | 9.96E-01 | 3.56E-01 | 2.12E-01 |
| 26916  | 0.01(0.26)  | -0.07(0.18) | -0.52(0.20) | -0.08(0.33) | -0.54(0.34) | -0.46(0.27) | 8.07E-01 | 1.15E-01 | 9.16E-02 | 9.96E-01 | 3.67E-01 | 3.13E-01 |
| 41708  | -0.20(0.23) | 0.18(0.22)  | 0.26(0.17)  | 0.38(0.32)  | 0.46(0.29)  | 0.08(0.28)  | 2.34E-01 | 1.16E-01 | 7.76E-01 | 9.96E-01 | 3.67E-01 | 9.28E-01 |
| 121890 | -0.04(0.17) | 0.18(0.20)  | -0.59(0.31) | 0.23(0.26)  | -0.55(0.34) | -0.77(0.37) | 3.94E-01 | 1.16E-01 | 4.07E-02 | 9.96E-01 | 3.67E-01 | 2.12E-01 |
| 6115   | -0.16(0.54) | 0.15(0.14)  | 0.77(0.25)  | 0.31(0.56)  | 0.93(0.61)  | 0.63(0.28)  | 5.86E-01 | 1.29E-01 | 2.92E-02 | 9.96E-01 | 4.04E-01 | 1.80E-01 |
| 32247  | 0.03(0.22)  | -0.07(0.28) | -0.39(0.17) | -0.10(0.36) | -0.42(0.27) | -0.32(0.32) | 7.87E-01 | 1.30E-01 | 3.22E-01 | 9.96E-01 | 4.05E-01 | 5.90E-01 |
| 119167 | 0.18(0.20)  | 0.35(0.21)  | 0.58(0.16)  | 0.17(0.29)  | 0.40(0.26)  | 0.23(0.27)  | 5.69E-01 | 1.33E-01 | 4.01E-01 | 9.96E-01 | 4.12E-01 | 6.53E-01 |
| 121002 | 0.02(0.26)  | -0.01(0.24) | -0.44(0.16) | -0.03(0.35) | -0.46(0.30) | -0.42(0.29) | 9.22E-01 | 1.38E-01 | 1.54E-01 | 9.96E-01 | 4.20E-01 | 4.25E-01 |
| 6802   | 0.02(0.26)  | 0.06(0.29)  | 0.48(0.14)  | 0.03(0.39)  | 0.45(0.30)  | 0.42(0.33)  | 9.31E-01 | 1.39E-01 | 2.12E-01 | 9.96E-01 | 4.20E-01 | 5.14E-01 |
| 2806   | 0.02(0.15)  | -0.78(0.94) | -1.01(0.68) | -0.80(0.95) | -1.03(0.69) | -0.23(1.18) | 4.01E-01 | 1.42E-01 | 8.48E-01 | 9.96E-01 | 4.24E-01 | 9.54E-01 |
| 13107  | -0.12(0.29) | -0.33(0.16) | -0.67(0.22) | -0.21(0.33) | -0.55(0.37) | -0.34(0.27) | 5.28E-01 | 1.44E-01 | 2.20E-01 | 9.96E-01 | 4.27E-01 | 5.16E-01 |
| 3029   | -0.06(0.24) | -0.07(0.35) | 0.36(0.15)  | -0.01(0.42) | 0.42(0.28)  | 0.43(0.38)  | 9.78E-01 | 1.45E-01 | 2.60E-01 | 9.96E-01 | 4.27E-01 | 5.53E-01 |
| 134336 | -0.20(0.18) | -0.21(0.31) | -0.55(0.16) | -0.01(0.36) | -0.35(0.24) | -0.34(0.35) | 9.83E-01 | 1.47E-01 | 3.23E-01 | 9.96E-01 | 4.27E-01 | 5.90E-01 |
| 892    | -0.49(0.75) | -0.07(0.12) | 0.77(0.47)  | 0.42(0.76)  | 1.26(0.87)  | 0.84(0.48)  | 5.81E-01 | 1.49E-01 | 8.45E-02 | 9.96E-01 | 4.30E-01 | 3.02E-01 |
| 135619 | 0.05(0.14)  | -0.09(0.31) | 0.64(0.39)  | -0.14(0.34) | 0.60(0.42)  | 0.74(0.50)  | 6.78E-01 | 1.58E-01 | 1.45E-01 | 9.96E-01 | 4.40E-01 | 4.16E-01 |
| 62     | -0.14(0.25) | -0.04(0.25) | -0.56(0.14) | 0.11(0.36)  | -0.42(0.29) | -0.53(0.28) | 7.66E-01 | 1.59E-01 | 6.64E-02 | 9.96E-01 | 4.40E-01 | 2.78E-01 |
| 5990   | 0.02(0.22)  | -0.06(0.24) | -0.38(0.17) | -0.08(0.33) | -0.40(0.28) | -0.32(0.30) | 8.06E-01 | 1.60E-01 | 2.86E-01 | 9.96E-01 | 4.40E-01 | 5.61E-01 |
| 41697  | -0.16(0.20) | 0.08(0.20)  | 0.25(0.22)  | 0.24(0.29)  | 0.42(0.29)  | 0.17(0.30)  | 3.98E-01 | 1.60E-01 | 5.68E-01 | 9.96E-01 | 4.40E-01 | 8.05E-01 |
| 1875   | -0.13(0.20) | -0.35(0.15) | -0.61(0.28) | -0.21(0.25) | -0.48(0.34) | -0.27(0.32) | 3.97E-01 | 1.64E-01 | 4.02E-01 | 9.96E-01 | 4.40E-01 | 6.53E-01 |
| 133943 | -0.15(0.22) | 0.04(0.16)  | -0.68(0.31) | 0.20(0.27)  | -0.53(0.38) | -0.73(0.35) | 4.69E-01 | 1.66E-01 | 4.38E-02 | 9.96E-01 | 4.40E-01 | 2.20E-01 |
| 7402   | 0.06(0.20)  | -0.15(0.24) | -1.21(0.91) | -0.21(0.30) | -1.28(0.91) | -1.07(0.93) | 4.87E-01 | 1.67E-01 | 2.56E-01 | 9.96E-01 | 4.41E-01 | 5.53E-01 |
| 160543 | -0.15(0.25) | 0.02(0.15)  | -0.68(0.29) | 0.17(0.29)  | -0.53(0.38) | -0.70(0.33) | 5.71E-01 | 1.71E-01 | 3.94E-02 | 9.96E-01 | 4.48E-01 | 2.09E-01 |
| 46292  | -0.24(0.23) | -0.18(0.20) | -0.65(0.17) | 0.07(0.31)  | -0.40(0.29) | -0.47(0.26) | 8.27E-01 | 1.75E-01 | 7.88E-02 | 9.96E-01 | 4.56E-01 | 2.96E-01 |
| 4543   | -0.06(0.15) | 0.04(0.20)  | -0.72(0.47) | 0.10(0.25)  | -0.67(0.49) | -0.76(0.51) | 7.03E-01 | 1.80E-01 | 1.37E-01 | 9.96E-01 | 4.56E-01 | 4.01E-01 |

|        |             |             |             |             |             |             |          |          |          |          |          |          |
|--------|-------------|-------------|-------------|-------------|-------------|-------------|----------|----------|----------|----------|----------|----------|
| 88583  | -0.05(0.19) | -0.05(0.24) | -0.42(0.20) | -0.00(0.30) | -0.37(0.27) | -0.37(0.30) | 9.90E-01 | 1.81E-01 | 2.29E-01 | 9.96E-01 | 4.56E-01 | 5.16E-01 |
| 3465   | -0.11(0.19) | 0.16(0.28)  | 0.28(0.22)  | 0.26(0.34)  | 0.38(0.28)  | 0.12(0.35)  | 4.39E-01 | 1.84E-01 | 7.40E-01 | 9.96E-01 | 4.56E-01 | 9.10E-01 |
| 4942   | 0.11(0.45)  | 0.03(0.13)  | 0.95(0.44)  | -0.07(0.47) | 0.84(0.63)  | 0.92(0.46)  | 8.74E-01 | 1.84E-01 | 5.02E-02 | 9.96E-01 | 4.56E-01 | 2.36E-01 |
| 87769  | -0.07(0.14) | -0.08(0.43) | -0.48(0.28) | -0.02(0.45) | -0.42(0.31) | -0.40(0.53) | 9.70E-01 | 1.90E-01 | 4.50E-01 | 9.96E-01 | 4.56E-01 | 6.93E-01 |
| 39     | -0.42(0.27) | -0.16(0.36) | -0.02(0.16) | 0.26(0.45)  | 0.40(0.31)  | 0.15(0.40)  | 5.67E-01 | 1.90E-01 | 7.15E-01 | 9.96E-01 | 4.56E-01 | 8.98E-01 |
| 68     | -0.11(0.20) | 0.03(0.25)  | -0.45(0.17) | 0.14(0.33)  | -0.34(0.26) | -0.48(0.30) | 6.63E-01 | 1.98E-01 | 1.14E-01 | 9.96E-01 | 4.66E-01 | 3.58E-01 |
| 6066   | -0.23(0.29) | 0.03(0.19)  | -0.64(0.14) | 0.26(0.34)  | -0.41(0.32) | -0.67(0.23) | 4.51E-01 | 1.99E-01 | 6.00E-03 | 9.96E-01 | 4.66E-01 | 5.80E-02 |
| 87720  | -0.12(0.20) | -0.17(0.19) | -0.49(0.22) | -0.05(0.28) | -0.37(0.30) | -0.32(0.29) | 8.55E-01 | 2.22E-01 | 2.72E-01 | 9.96E-01 | 5.10E-01 | 5.60E-01 |
| 1872   | -0.14(0.21) | -0.20(0.29) | 0.19(0.18)  | -0.06(0.35) | 0.33(0.27)  | 0.40(0.35)  | 8.61E-01 | 2.25E-01 | 2.55E-01 | 9.96E-01 | 5.13E-01 | 5.53E-01 |
| 41808  | -0.13(0.18) | 0.03(0.28)  | -0.49(0.24) | 0.16(0.33)  | -0.36(0.31) | -0.52(0.37) | 6.24E-01 | 2.42E-01 | 1.67E-01 | 9.96E-01 | 5.47E-01 | 4.46E-01 |
| 1981   | -0.07(0.17) | -0.07(0.37) | -0.36(0.18) | -0.00(0.41) | -0.29(0.25) | -0.29(0.41) | 9.95E-01 | 2.47E-01 | 4.78E-01 | 9.96E-01 | 5.54E-01 | 7.21E-01 |
| 127277 | 0.09(0.22)  | 0.40(0.28)  | -0.26(0.21) | 0.31(0.36)  | -0.36(0.31) | -0.67(0.35) | 3.88E-01 | 2.49E-01 | 5.93E-02 | 9.96E-01 | 5.54E-01 | 2.63E-01 |
| 3232   | -0.05(0.60) | 0.04(0.13)  | -0.83(0.34) | 0.09(0.61)  | -0.78(0.70) | -0.86(0.37) | 8.89E-01 | 2.69E-01 | 2.12E-02 | 9.96E-01 | 5.83E-01 | 1.48E-01 |
| 1709   | -0.17(0.29) | 0.43(0.22)  | -0.51(0.14) | 0.60(0.37)  | -0.34(0.31) | -0.94(0.26) | 1.06E-01 | 2.81E-01 | 7.20E-04 | 9.96E-01 | 6.05E-01 | 1.81E-02 |
| 42357  | 0.03(0.15)  | 0.13(0.26)  | -0.28(0.25) | 0.10(0.30)  | -0.31(0.30) | -0.42(0.37) | 7.37E-01 | 2.93E-01 | 2.59E-01 | 9.96E-01 | 6.21E-01 | 5.53E-01 |
| 134    | -0.32(0.53) | 0.00(0.16)  | 0.27(0.22)  | 0.32(0.56)  | 0.59(0.58)  | 0.27(0.27)  | 5.68E-01 | 3.09E-01 | 3.20E-01 | 9.96E-01 | 6.48E-01 | 5.90E-01 |
| 98027  | 0.22(0.54)  | 0.19(0.18)  | -0.38(0.26) | -0.03(0.57) | -0.61(0.60) | -0.58(0.31) | 9.60E-01 | 3.14E-01 | 7.01E-02 | 9.96E-01 | 6.51E-01 | 2.81E-01 |
| 443    | -0.09(0.27) | 0.06(0.16)  | -0.42(0.22) | 0.15(0.31)  | -0.33(0.34) | -0.48(0.27) | 6.32E-01 | 3.32E-01 | 8.36E-02 | 9.96E-01 | 6.67E-01 | 3.02E-01 |
| 17263  | 0.02(0.18)  | 0.26(0.30)  | -0.25(0.22) | 0.24(0.35)  | -0.27(0.28) | -0.51(0.37) | 5.01E-01 | 3.35E-01 | 1.78E-01 | 9.96E-01 | 6.67E-01 | 4.63E-01 |
| 2011   | 0.05(0.16)  | -0.48(0.38) | -0.22(0.24) | -0.53(0.41) | -0.27(0.29) | 0.26(0.45)  | 2.02E-01 | 3.43E-01 | 5.71E-01 | 9.96E-01 | 6.74E-01 | 8.05E-01 |
| 4600   | -0.18(0.23) | 0.08(0.20)  | -0.49(0.27) | 0.26(0.31)  | -0.31(0.33) | -0.57(0.34) | 4.14E-01 | 3.45E-01 | 1.03E-01 | 9.96E-01 | 6.74E-01 | 3.37E-01 |
| 106936 | -0.20(0.19) | -0.01(0.24) | 0.07(0.22)  | 0.19(0.30)  | 0.27(0.29)  | 0.08(0.32)  | 5.17E-01 | 3.45E-01 | 8.01E-01 | 9.96E-01 | 6.74E-01 | 9.38E-01 |
| 130396 | -0.60(1.14) | 0.01(0.12)  | -2.04(0.99) | 0.61(1.14)  | -1.45(1.53) | -2.05(1.00) | 5.97E-01 | 3.47E-01 | 4.43E-02 | 9.96E-01 | 6.75E-01 | 2.20E-01 |
| 117141 | -0.09(0.29) | 0.45(0.57)  | -0.38(0.13) | 0.54(0.65)  | -0.29(0.31) | -0.83(0.58) | 4.08E-01 | 3.52E-01 | 1.59E-01 | 9.96E-01 | 6.80E-01 | 4.30E-01 |
| 17068  | -0.21(0.31) | 0.13(0.31)  | -0.52(0.12) | 0.34(0.44)  | -0.31(0.33) | -0.65(0.34) | 4.38E-01 | 3.54E-01 | 5.69E-02 | 9.96E-01 | 6.80E-01 | 2.62E-01 |
| 4926   | 0.00(0.14)  | 0.15(0.51)  | 0.28(0.27)  | 0.15(0.53)  | 0.28(0.31)  | 0.14(0.59)  | 7.82E-01 | 3.57E-01 | 8.17E-01 | 9.96E-01 | 6.82E-01 | 9.41E-01 |
| 7718   | 0.02(0.19)  | 0.00(0.19)  | -0.26(0.24) | -0.01(0.27) | -0.28(0.30) | -0.27(0.31) | 9.64E-01 | 3.62E-01 | 3.87E-01 | 9.96E-01 | 6.89E-01 | 6.45E-01 |
| 5288   | -0.58(0.54) | 0.13(0.46)  | -0.08(0.13) | 0.72(0.73)  | 0.50(0.56)  | -0.22(0.48) | 3.32E-01 | 3.70E-01 | 6.54E-01 | 9.96E-01 | 6.94E-01 | 8.50E-01 |
| 146957 | -0.27(0.24) | -0.15(0.23) | -0.52(0.16) | 0.12(0.33)  | -0.25(0.28) | -0.37(0.28) | 7.20E-01 | 3.84E-01 | 1.88E-01 | 9.96E-01 | 7.06E-01 | 4.80E-01 |
| 4937   | -0.07(0.23) | 0.00(0.29)  | -0.33(0.18) | 0.07(0.37)  | -0.26(0.29) | -0.33(0.35) | 8.41E-01 | 3.86E-01 | 3.44E-01 | 9.96E-01 | 7.06E-01 | 6.25E-01 |

|        |             |             |             |             |             |             |          |          |          |          |          |          |
|--------|-------------|-------------|-------------|-------------|-------------|-------------|----------|----------|----------|----------|----------|----------|
| 5930   | -0.04(0.21) | -0.31(0.29) | -0.27(0.16) | -0.27(0.36) | -0.23(0.27) | 0.04(0.34)  | 4.63E-01 | 3.90E-01 | 9.17E-01 | 9.96E-01 | 7.08E-01 | 9.82E-01 |
| 6580   | 0.00(0.33)  | 0.00(0.15)  | 0.35(0.24)  | -0.00(0.36) | 0.35(0.40)  | 0.35(0.28)  | 9.94E-01 | 3.93E-01 | 2.14E-01 | 9.96E-01 | 7.08E-01 | 5.14E-01 |
| 3286   | -1.35(1.92) | 0.00(3.00)  | 0.30(0.12)  | 1.35(3.55)  | 1.65(1.92)  | 0.30(3.00)  | 7.05E-01 | 3.95E-01 | 9.21E-01 | 9.96E-01 | 7.10E-01 | 9.83E-01 |
| 100253 | -0.06(0.16) | 0.02(0.29)  | 0.19(0.25)  | 0.07(0.33)  | 0.25(0.29)  | 0.17(0.37)  | 8.24E-01 | 4.07E-01 | 6.41E-01 | 9.96E-01 | 7.24E-01 | 8.36E-01 |
| 3258   | -0.07(0.18) | 0.05(0.24)  | -0.29(0.21) | 0.12(0.30)  | -0.22(0.28) | -0.34(0.32) | 6.96E-01 | 4.17E-01 | 2.81E-01 | 9.96E-01 | 7.38E-01 | 5.61E-01 |
| 119066 | -0.34(0.27) | -0.05(0.20) | -0.04(0.27) | 0.29(0.33)  | 0.30(0.38)  | 0.01(0.33)  | 3.82E-01 | 4.28E-01 | 9.78E-01 | 9.96E-01 | 7.49E-01 | 9.94E-01 |
| 4933   | 0.12(0.27)  | 0.04(0.16)  | -0.18(0.26) | -0.08(0.31) | -0.30(0.38) | -0.22(0.31) | 7.98E-01 | 4.29E-01 | 4.76E-01 | 9.96E-01 | 7.49E-01 | 7.21E-01 |
| 145494 | 0.21(0.19)  | 0.01(0.18)  | 0.48(0.30)  | -0.20(0.27) | 0.27(0.35)  | 0.47(0.34)  | 4.61E-01 | 4.38E-01 | 1.74E-01 | 9.96E-01 | 7.52E-01 | 4.63E-01 |
| 120562 | -0.07(0.22) | 0.04(0.18)  | -0.32(0.24) | 0.11(0.29)  | -0.25(0.33) | -0.36(0.30) | 7.17E-01 | 4.43E-01 | 2.29E-01 | 9.96E-01 | 7.52E-01 | 5.16E-01 |
| 2900   | -0.16(0.27) | 0.52(0.44)  | 0.14(0.28)  | 0.68(0.53)  | 0.30(0.39)  | -0.38(0.51) | 2.03E-01 | 4.44E-01 | 4.62E-01 | 9.96E-01 | 7.52E-01 | 7.04E-01 |
| 93947  | 0.12(0.30)  | 0.07(0.16)  | -0.17(0.21) | -0.05(0.34) | -0.28(0.37) | -0.24(0.27) | 8.91E-01 | 4.45E-01 | 3.79E-01 | 9.96E-01 | 7.52E-01 | 6.45E-01 |
| 307    | -0.01(0.19) | 0.40(0.27)  | -0.21(0.19) | 0.41(0.33)  | -0.20(0.26) | -0.60(0.34) | 2.21E-01 | 4.59E-01 | 8.01E-02 | 9.96E-01 | 7.64E-01 | 2.96E-01 |
| 17253  | -0.04(0.26) | -0.15(0.20) | -0.30(0.23) | -0.11(0.32) | -0.26(0.35) | -0.15(0.30) | 7.38E-01 | 4.60E-01 | 6.14E-01 | 9.96E-01 | 7.64E-01 | 8.36E-01 |
| 6864   | -0.29(0.30) | 0.08(0.24)  | -0.03(0.20) | 0.38(0.38)  | 0.26(0.35)  | -0.12(0.31) | 3.21E-01 | 4.65E-01 | 7.09E-01 | 9.96E-01 | 7.68E-01 | 8.98E-01 |
| 47     | -0.34(0.23) | -0.02(0.40) | -0.53(0.14) | 0.32(0.45)  | -0.19(0.26) | -0.51(0.42) | 4.75E-01 | 4.67E-01 | 2.27E-01 | 9.96E-01 | 7.69E-01 | 5.16E-01 |
| 5085   | 0.02(0.13)  | 0.00(0.64)  | 0.48(0.63)  | -0.03(0.65) | 0.46(0.64)  | 0.48(0.90)  | 9.67E-01 | 4.78E-01 | 5.91E-01 | 9.96E-01 | 7.75E-01 | 8.23E-01 |
| 2039   | 0.01(0.27)  | 0.37(0.49)  | -0.21(0.14) | 0.36(0.57)  | -0.22(0.32) | -0.58(0.50) | 5.34E-01 | 4.79E-01 | 2.48E-01 | 9.96E-01 | 7.75E-01 | 5.46E-01 |
| 160542 | -0.20(0.15) | 0.11(0.32)  | -0.40(0.24) | 0.31(0.35)  | -0.20(0.28) | -0.51(0.39) | 3.76E-01 | 4.82E-01 | 1.99E-01 | 9.96E-01 | 7.75E-01 | 4.97E-01 |
| 4577   | -0.64(0.64) | -0.29(0.39) | -0.19(0.13) | 0.36(0.75)  | 0.46(0.65)  | 0.10(0.41)  | 6.38E-01 | 4.83E-01 | 8.01E-01 | 9.96E-01 | 7.75E-01 | 9.38E-01 |
| 4936   | 0.46(1.54)  | -0.04(0.33) | -0.61(0.38) | -0.50(1.57) | -1.08(1.58) | -0.57(0.50) | 7.49E-01 | 4.99E-01 | 2.57E-01 | 9.96E-01 | 7.90E-01 | 5.53E-01 |
| 4609   | -0.03(0.24) | -0.10(0.54) | -0.25(0.23) | -0.07(0.59) | -0.22(0.33) | -0.15(0.58) | 9.07E-01 | 5.01E-01 | 7.95E-01 | 9.96E-01 | 7.91E-01 | 9.37E-01 |
| 4986   | 0.12(0.33)  | 0.02(0.18)  | -0.13(0.19) | -0.11(0.38) | -0.25(0.38) | -0.15(0.26) | 7.77E-01 | 5.07E-01 | 5.72E-01 | 9.96E-01 | 7.95E-01 | 8.05E-01 |
| 2936   | -0.44(0.57) | -0.13(0.44) | -0.06(0.13) | 0.31(0.72)  | 0.38(0.58)  | 0.08(0.45)  | 6.71E-01 | 5.14E-01 | 8.69E-01 | 9.96E-01 | 8.00E-01 | 9.61E-01 |
| 87710  | 0.40(0.83)  | -0.02(0.16) | -0.15(0.23) | -0.42(0.84) | -0.55(0.86) | -0.13(0.28) | 6.23E-01 | 5.25E-01 | 6.41E-01 | 9.96E-01 | 8.10E-01 | 8.36E-01 |
| 160    | 0.02(0.16)  | 0.39(0.43)  | -0.30(0.50) | 0.37(0.45)  | -0.32(0.52) | -0.69(0.65) | 4.14E-01 | 5.38E-01 | 2.93E-01 | 9.96E-01 | 8.20E-01 | 5.69E-01 |
| 160463 | 0.12(0.23)  | 0.25(0.23)  | -0.06(0.17) | 0.14(0.32)  | -0.18(0.29) | -0.31(0.29) | 6.72E-01 | 5.40E-01 | 2.84E-01 | 9.96E-01 | 8.20E-01 | 5.61E-01 |
| 160313 | -0.03(0.20) | -0.68(0.62) | 0.13(0.17)  | -0.66(0.65) | 0.16(0.27)  | 0.81(0.64)  | 3.20E-01 | 5.56E-01 | 2.11E-01 | 9.96E-01 | 8.37E-01 | 5.14E-01 |
| 112487 | -0.27(0.36) | 0.09(0.31)  | -0.50(0.12) | 0.36(0.49)  | -0.23(0.38) | -0.59(0.34) | 4.65E-01 | 5.58E-01 | 8.49E-02 | 9.96E-01 | 8.37E-01 | 3.02E-01 |
| 4863   | -0.03(0.23) | 0.51(0.41)  | -0.19(0.15) | 0.54(0.46)  | -0.16(0.28) | -0.70(0.44) | 2.47E-01 | 5.60E-01 | 1.13E-01 | 9.96E-01 | 8.37E-01 | 3.58E-01 |
| 17453  | -0.47(0.63) | 0.02(0.13)  | -0.94(0.51) | 0.49(0.64)  | -0.47(0.81) | -0.96(0.53) | 4.44E-01 | 5.65E-01 | 7.28E-02 | 9.96E-01 | 8.37E-01 | 2.89E-01 |



|        |             |             |             |             |             |             |          |          |          |          |          |          |
|--------|-------------|-------------|-------------|-------------|-------------|-------------|----------|----------|----------|----------|----------|----------|
| 4898   | -0.27(0.25) | 0.05(0.21)  | -0.44(0.16) | 0.32(0.33)  | -0.17(0.29) | -0.49(0.27) | 3.41E-01 | 5.66E-01 | 7.74E-02 | 9.96E-01 | 8.37E-01 | 2.96E-01 |
| 93385  | -0.17(0.19) | 0.21(0.28)  | -0.35(0.26) | 0.38(0.33)  | -0.18(0.32) | -0.56(0.38) | 2.61E-01 | 5.80E-01 | 1.46E-01 | 9.96E-01 | 8.55E-01 | 4.16E-01 |
| 145492 | -0.85(0.81) | 0.00(0.13)  | -0.38(0.29) | 0.85(0.82)  | 0.47(0.86)  | -0.38(0.31) | 3.02E-01 | 5.86E-01 | 2.29E-01 | 9.96E-01 | 8.56E-01 | 5.16E-01 |
| 21513  | -0.03(0.14) | 0.20(0.34)  | 0.20(0.39)  | 0.23(0.36)  | 0.23(0.42)  | 0.00(0.53)  | 5.28E-01 | 5.86E-01 | 9.96E-01 | 9.96E-01 | 8.56E-01 | 9.98E-01 |
| 8607   | 0.09(0.20)  | 0.17(0.20)  | -0.07(0.23) | 0.08(0.28)  | -0.16(0.30) | -0.24(0.31) | 7.81E-01 | 5.93E-01 | 4.46E-01 | 9.96E-01 | 8.57E-01 | 6.93E-01 |
| 119129 | -0.03(0.16) | 0.02(0.21)  | -0.27(0.43) | 0.05(0.27)  | -0.25(0.46) | -0.29(0.48) | 8.58E-01 | 5.94E-01 | 5.41E-01 | 9.96E-01 | 8.57E-01 | 7.79E-01 |
| 110    | -0.19(0.35) | -0.39(0.41) | 0.00(0.15)  | -0.20(0.53) | 0.19(0.38)  | 0.39(0.43)  | 7.05E-01 | 6.21E-01 | 3.67E-01 | 9.96E-01 | 8.78E-01 | 6.45E-01 |
| 4976   | 0.00(0.15)  | -0.03(0.28) | -0.17(0.32) | -0.04(0.32) | -0.18(0.36) | -0.14(0.43) | 9.11E-01 | 6.26E-01 | 7.44E-01 | 9.96E-01 | 8.79E-01 | 9.10E-01 |
| 64551  | -0.13(0.20) | -0.18(0.25) | 0.00(0.18)  | -0.05(0.32) | 0.13(0.27)  | 0.18(0.31)  | 8.69E-01 | 6.30E-01 | 5.52E-01 | 9.96E-01 | 8.79E-01 | 7.91E-01 |
| 1996   | -0.38(0.28) | 0.17(0.58)  | -0.24(0.14) | 0.56(0.63)  | 0.14(0.31)  | -0.41(0.58) | 3.82E-01 | 6.39E-01 | 4.81E-01 | 9.96E-01 | 8.79E-01 | 7.23E-01 |
| 109423 | -0.19(0.25) | -0.30(0.14) | -0.38(0.35) | -0.11(0.28) | -0.19(0.43) | -0.08(0.38) | 6.96E-01 | 6.57E-01 | 8.32E-01 | 9.96E-01 | 8.94E-01 | 9.51E-01 |
| 6331   | -0.22(0.27) | 0.21(0.24)  | -0.36(0.19) | 0.43(0.37)  | -0.14(0.33) | -0.57(0.31) | 2.42E-01 | 6.66E-01 | 6.74E-02 | 9.96E-01 | 8.94E-01 | 2.78E-01 |
| 14509  | -0.15(0.21) | -0.16(0.31) | -0.27(0.19) | -0.01(0.38) | -0.12(0.28) | -0.10(0.37) | 9.75E-01 | 6.79E-01 | 7.78E-01 | 9.96E-01 | 8.94E-01 | 9.28E-01 |
| 107960 | -0.14(0.39) | 0.02(0.27)  | -0.31(0.15) | 0.15(0.47)  | -0.17(0.42) | -0.33(0.32) | 7.44E-01 | 6.79E-01 | 3.07E-01 | 9.96E-01 | 8.94E-01 | 5.85E-01 |
| 153    | -0.39(0.46) | 0.21(0.35)  | -0.21(0.14) | 0.60(0.59)  | 0.19(0.47)  | -0.41(0.38) | 3.14E-01 | 6.93E-01 | 2.80E-01 | 9.96E-01 | 9.02E-01 | 5.61E-01 |
| 91421  | -0.21(0.34) | -0.10(0.20) | -0.06(0.18) | 0.12(0.39)  | 0.15(0.39)  | 0.04(0.27)  | 7.65E-01 | 6.97E-01 | 8.94E-01 | 9.96E-01 | 9.02E-01 | 9.69E-01 |
| 31357  | -0.11(0.21) | -0.03(0.17) | -0.24(0.26) | 0.08(0.27)  | -0.13(0.33) | -0.21(0.31) | 7.61E-01 | 7.09E-01 | 5.04E-01 | 9.96E-01 | 9.02E-01 | 7.42E-01 |
| 119023 | 0.23(0.51)  | 0.04(0.13)  | -0.03(0.55) | -0.19(0.53) | -0.26(0.73) | -0.07(0.57) | 7.12E-01 | 7.23E-01 | 9.08E-01 | 9.96E-01 | 9.02E-01 | 9.78E-01 |
| 4922   | 0.00(0.26)  | -0.30(0.25) | 0.20(0.52)  | -0.30(0.36) | 0.20(0.58)  | 0.50(0.57)  | 4.13E-01 | 7.31E-01 | 3.87E-01 | 9.96E-01 | 9.02E-01 | 6.45E-01 |
| 4941   | -0.08(0.29) | 0.15(0.23)  | -0.20(0.22) | 0.23(0.37)  | -0.12(0.36) | -0.35(0.31) | 5.32E-01 | 7.39E-01 | 2.65E-01 | 9.96E-01 | 9.02E-01 | 5.53E-01 |
| 135889 | 1.44(3.50)  | 0.28(0.22)  | 0.26(0.28)  | -1.16(3.51) | -1.18(3.54) | -0.03(0.35) | 7.43E-01 | 7.39E-01 | 9.43E-01 | 9.96E-01 | 9.02E-01 | 9.87E-01 |
| 4925   | -0.07(0.23) | 0.12(0.21)  | 0.04(0.22)  | 0.19(0.32)  | 0.10(0.32)  | -0.09(0.30) | 5.44E-01 | 7.43E-01 | 7.68E-01 | 9.96E-01 | 9.02E-01 | 9.23E-01 |
| 31559  | 0.17(0.44)  | 0.00(0.18)  | 0.01(0.18)  | -0.17(0.47) | -0.16(0.48) | 0.02(0.25)  | 7.18E-01 | 7.43E-01 | 9.51E-01 | 9.96E-01 | 9.02E-01 | 9.87E-01 |
| 1878   | -0.27(0.22) | -0.18(0.18) | -0.37(0.21) | 0.09(0.28)  | -0.10(0.31) | -0.19(0.28) | 7.52E-01 | 7.45E-01 | 5.04E-01 | 9.96E-01 | 9.02E-01 | 7.42E-01 |
| 4983   | -0.20(0.37) | 0.16(0.24)  | -0.07(0.16) | 0.36(0.45)  | 0.13(0.40)  | -0.23(0.29) | 4.21E-01 | 7.47E-01 | 4.20E-01 | 9.96E-01 | 9.02E-01 | 6.71E-01 |
| 41699  | -0.19(0.32) | 0.07(0.43)  | -0.08(0.14) | 0.26(0.55)  | 0.11(0.35)  | -0.15(0.45) | 6.41E-01 | 7.51E-01 | 7.50E-01 | 9.96E-01 | 9.02E-01 | 9.12E-01 |
| 5482   | -0.20(0.25) | -0.02(0.17) | -0.09(0.27) | 0.18(0.30)  | 0.11(0.35)  | -0.07(0.32) | 5.66E-01 | 7.52E-01 | 8.37E-01 | 9.96E-01 | 9.02E-01 | 9.51E-01 |
| 4975   | 0.16(0.24)  | 0.06(0.21)  | 0.06(0.20)  | -0.10(0.32) | -0.10(0.31) | 0.00(0.28)  | 7.61E-01 | 7.54E-01 | 9.98E-01 | 9.96E-01 | 9.02E-01 | 9.98E-01 |
| 16788  | 0.00(0.17)  | 0.24(0.22)  | 0.10(0.26)  | 0.24(0.28)  | 0.10(0.32)  | -0.14(0.34) | 3.91E-01 | 7.55E-01 | 6.69E-01 | 9.96E-01 | 9.02E-01 | 8.63E-01 |
| 6579   | -0.19(0.23) | 0.01(0.23)  | -0.10(0.18) | 0.20(0.33)  | 0.09(0.30)  | -0.11(0.29) | 5.55E-01 | 7.61E-01 | 7.20E-01 | 9.96E-01 | 9.02E-01 | 8.98E-01 |

|        |             |             |             |             |             |             |          |          |          |          |          |          |
|--------|-------------|-------------|-------------|-------------|-------------|-------------|----------|----------|----------|----------|----------|----------|
| 1675   | -0.08(0.42) | 0.74(0.55)  | 0.05(0.12)  | 0.82(0.70)  | 0.13(0.44)  | -0.69(0.57) | 2.46E-01 | 7.63E-01 | 2.27E-01 | 9.96E-01 | 9.02E-01 | 5.16E-01 |
| 7053   | 0.07(0.28)  | 0.02(0.33)  | -0.02(0.17) | -0.05(0.43) | -0.10(0.33) | -0.05(0.37) | 9.02E-01 | 7.66E-01 | 9.04E-01 | 9.96E-01 | 9.02E-01 | 9.77E-01 |
| 9392   | 0.00(0.28)  | -0.01(0.18) | 0.10(0.24)  | -0.00(0.33) | 0.11(0.37)  | 0.11(0.30)  | 9.95E-01 | 7.70E-01 | 7.17E-01 | 9.96E-01 | 9.02E-01 | 8.98E-01 |
| 4971   | -0.08(0.20) | 0.03(0.20)  | 0.01(0.24)  | 0.11(0.29)  | 0.09(0.32)  | -0.02(0.31) | 7.05E-01 | 7.87E-01 | 9.39E-01 | 9.96E-01 | 9.09E-01 | 9.87E-01 |
| 122151 | -0.04(0.35) | 0.15(0.26)  | -0.15(0.16) | 0.20(0.44)  | -0.10(0.38) | -0.30(0.30) | 6.56E-01 | 7.89E-01 | 3.15E-01 | 9.96E-01 | 9.09E-01 | 5.88E-01 |
| 120526 | -0.14(0.34) | 0.35(0.30)  | -0.23(0.15) | 0.48(0.45)  | -0.10(0.37) | -0.58(0.34) | 2.87E-01 | 7.90E-01 | 8.74E-02 | 9.96E-01 | 9.09E-01 | 3.08E-01 |
| 448    | -0.03(0.26) | -0.12(0.21) | -0.11(0.21) | -0.10(0.33) | -0.09(0.34) | 0.01(0.31)  | 7.71E-01 | 8.00E-01 | 9.74E-01 | 9.96E-01 | 9.11E-01 | 9.94E-01 |
| 103102 | -0.37(0.35) | -0.69(0.45) | -0.28(0.13) | -0.32(0.56) | 0.09(0.37)  | 0.41(0.46)  | 5.75E-01 | 8.02E-01 | 3.70E-01 | 9.96E-01 | 9.11E-01 | 6.45E-01 |
| 139436 | -0.15(0.19) | -0.10(0.21) | -0.23(0.29) | 0.05(0.28)  | -0.08(0.33) | -0.13(0.35) | 8.60E-01 | 8.13E-01 | 7.19E-01 | 9.96E-01 | 9.15E-01 | 8.98E-01 |
| 469    | -0.08(0.25) | 0.17(0.27)  | -0.15(0.16) | 0.25(0.37)  | -0.07(0.29) | -0.32(0.31) | 4.95E-01 | 8.15E-01 | 3.03E-01 | 9.96E-01 | 9.15E-01 | 5.82E-01 |
| 47170  | -0.18(0.49) | -0.06(0.15) | -0.29(0.22) | 0.13(0.51)  | -0.11(0.54) | -0.24(0.26) | 8.07E-01 | 8.39E-01 | 3.72E-01 | 9.96E-01 | 9.33E-01 | 6.45E-01 |
| 34075  | -0.13(0.55) | 0.17(0.17)  | -0.24(0.29) | 0.29(0.58)  | -0.11(0.62) | -0.41(0.33) | 6.14E-01 | 8.56E-01 | 2.30E-01 | 9.96E-01 | 9.43E-01 | 5.16E-01 |
| 573    | -0.01(0.28) | -0.07(0.24) | -0.07(0.17) | -0.05(0.37) | -0.06(0.33) | -0.01(0.30) | 8.87E-01 | 8.58E-01 | 9.83E-01 | 9.96E-01 | 9.43E-01 | 9.96E-01 |
| 4938   | -0.34(1.96) | 0.34(0.99)  | 0.01(0.12)  | 0.69(2.24)  | 0.35(1.97)  | -0.33(1.00) | 7.60E-01 | 8.58E-01 | 7.39E-01 | 9.96E-01 | 9.43E-01 | 9.10E-01 |
| 16561  | -0.05(0.27) | -0.06(0.26) | 0.00(0.17)  | -0.01(0.38) | 0.05(0.32)  | 0.06(0.30)  | 9.84E-01 | 8.64E-01 | 8.38E-01 | 9.96E-01 | 9.46E-01 | 9.51E-01 |
| 4932   | 0.42(1.26)  | -0.02(0.15) | 0.21(0.23)  | -0.44(1.28) | -0.21(1.29) | 0.22(0.27)  | 7.34E-01 | 8.70E-01 | 4.10E-01 | 9.96E-01 | 9.46E-01 | 6.61E-01 |
| 490    | -0.02(0.20) | -0.11(0.61) | 0.01(0.16)  | -0.08(0.64) | 0.04(0.25)  | 0.12(0.63)  | 8.97E-01 | 8.81E-01 | 8.48E-01 | 9.96E-01 | 9.53E-01 | 9.54E-01 |
| 1064   | 0.06(0.24)  | 0.21(0.48)  | 0.10(0.14)  | 0.14(0.54)  | 0.04(0.28)  | -0.10(0.51) | 7.91E-01 | 8.86E-01 | 8.39E-01 | 9.96E-01 | 9.53E-01 | 9.51E-01 |
| 4871   | -0.04(0.30) | 0.02(0.28)  | 0.01(0.15)  | 0.06(0.40)  | 0.05(0.33)  | -0.02(0.31) | 8.76E-01 | 8.88E-01 | 9.57E-01 | 9.96E-01 | 9.53E-01 | 9.87E-01 |
| 4948   | 0.11(0.19)  | 0.43(0.57)  | 0.13(0.16)  | 0.32(0.60)  | 0.03(0.25)  | -0.30(0.59) | 5.92E-01 | 9.17E-01 | 6.15E-01 | 9.96E-01 | 9.77E-01 | 8.36E-01 |
| 1704   | -0.05(0.17) | -0.26(0.29) | -0.01(0.37) | -0.21(0.34) | 0.04(0.41)  | 0.25(0.45)  | 5.38E-01 | 9.23E-01 | 5.85E-01 | 9.96E-01 | 9.78E-01 | 8.17E-01 |
| 109387 | 0.06(0.36)  | 0.01(0.39)  | 0.03(0.14)  | -0.05(0.52) | -0.04(0.38) | 0.02(0.41)  | 9.20E-01 | 9.23E-01 | 9.69E-01 | 9.96E-01 | 9.78E-01 | 9.93E-01 |
| 111162 | 0.01(0.18)  | -0.29(0.49) | -0.07(0.79) | -0.30(0.52) | -0.08(0.81) | 0.22(0.93)  | 5.63E-01 | 9.26E-01 | 8.11E-01 | 9.96E-01 | 9.78E-01 | 9.41E-01 |
| 139478 | -0.08(0.28) | -0.10(0.15) | 0.11(2.10)  | -0.02(0.32) | 0.18(2.13)  | 0.21(2.11)  | 9.45E-01 | 9.32E-01 | 9.23E-01 | 9.96E-01 | 9.79E-01 | 9.83E-01 |
| 4533   | -0.07(0.57) | 0.03(0.16)  | -0.02(0.22) | 0.10(0.59)  | 0.05(0.61)  | -0.05(0.28) | 8.63E-01 | 9.33E-01 | 8.57E-01 | 9.96E-01 | 9.79E-01 | 9.61E-01 |
| 160464 | -0.05(0.23) | -0.07(0.19) | -0.08(0.23) | -0.02(0.30) | -0.03(0.33) | -0.01(0.30) | 9.55E-01 | 9.39E-01 | 9.78E-01 | 9.96E-01 | 9.80E-01 | 9.94E-01 |
| 137    | 0.07(0.20)  | -0.09(0.28) | 0.09(0.19)  | -0.16(0.35) | 0.02(0.27)  | 0.18(0.35)  | 6.48E-01 | 9.52E-01 | 6.10E-01 | 9.96E-01 | 9.86E-01 | 8.36E-01 |
| 479    | -0.29(0.34) | 0.03(0.16)  | -0.31(0.21) | 0.32(0.38)  | -0.02(0.40) | -0.34(0.27) | 4.06E-01 | 9.60E-01 | 2.14E-01 | 9.96E-01 | 9.92E-01 | 5.14E-01 |
| 61     | -0.40(0.46) | -0.16(0.30) | -0.42(0.14) | 0.25(0.55)  | -0.02(0.47) | -0.26(0.33) | 6.54E-01 | 9.73E-01 | 4.22E-01 | 9.96E-01 | 9.99E-01 | 6.71E-01 |
| 26918  | -0.12(0.23) | 0.01(0.19)  | -0.13(0.21) | 0.13(0.30)  | -0.01(0.32) | -0.14(0.28) | 6.65E-01 | 9.73E-01 | 6.22E-01 | 9.96E-01 | 9.99E-01 | 8.36E-01 |

|       |             |             |             |             |             |             |          |          |          |          |          |          |
|-------|-------------|-------------|-------------|-------------|-------------|-------------|----------|----------|----------|----------|----------|----------|
| 18488 | 0.00(0.24)  | -0.05(0.21) | -0.01(0.19) | -0.05(0.32) | -0.01(0.31) | 0.04(0.28)  | 8.78E-01 | 9.79E-01 | 8.84E-01 | 9.96E-01 | 9.99E-01 | 9.68E-01 |
| 41691 | -0.30(0.61) | -0.31(0.38) | -0.31(0.14) | -0.00(0.71) | -0.01(0.63) | -0.01(0.40) | 9.94E-01 | 9.87E-01 | 9.90E-01 | 9.96E-01 | 1.00E+0  | 9.98E-01 |
| 4928  | -0.07(0.27) | -0.30(0.28) | -0.06(1.59) | -0.23(0.39) | 0.01(1.60)  | 0.24(1.61)  | 5.53E-01 | 9.97E-01 | 8.85E-01 | 9.96E-01 | 1.00E+0  | 9.68E-01 |
| 4956  | -0.07(0.66) | -0.02(0.13) | -0.07(0.32) | 0.05(0.67)  | 0.00(0.73)  | -0.05(0.34) | 9.40E-01 | 1.00E+0  | 8.84E-01 | 9.96E-01 | 1.00E+0  | 9.68E-01 |

Regression coefficient  $\beta^*$  (standard error (SE)) denotes the association between % change in metabolites and % change in PFG in each intervention group (IMI, BAND or RYGB).  $\beta^\dagger$  (SE) denotes the association between % change in metabolites and % change in FPG induced by different types of weight-loss interventions (BAND vs. IMI, RYGB vs. IMI, and RYGB vs. BAND), and was obtained from the interaction term (% change in metabolites  $\times$  types of intervention) in a linear regression model. In the model, the dependent variable was % change in FPG, and % change in each metabolite, intervention groups (RYGB, BAND, IMI), and their interactions (% change in each metabolite  $\times$  types of intervention) were the independent variables, adjusting for weight loss, sex, baseline age and BMI.

**Table S4. Differential association between changes in metabolites and change in HbA1c before and 1-yr after intervention**

| Metabolites            | $\beta^*(SE)$ |             |             | $\beta^\dagger (SE)$ |              |               | p-value      |              |               | q-value      |              |               |
|------------------------|---------------|-------------|-------------|----------------------|--------------|---------------|--------------|--------------|---------------|--------------|--------------|---------------|
|                        | IMI           | BAND        | RYGB        | BAND vs. IMI         | RYGB vs. IMI | RYGB vs. BAND | BAND vs. IMI | RYGB vs. IMI | RYGB vs. BAND | BAND vs. IMI | RYGB vs. IMI | RYGB vs. BAND |
| <b>Known</b>           |               |             |             |                      |              |               |              |              |               |              |              |               |
| Allantoin              | 0.01(0.12)    | -0.06(0.21) | -2.28(0.58) | -0.07(0.24)          | -2.29(0.60)  | -2.22(0.62)   | 7.84E-01     | 2.87E-04     | 6.56E-04      | 9.95E-01     | 2.81E-02     | 4.79E-02      |
| Aminomalonate          | -0.05(0.09)   | -0.22(0.37) | -0.86(0.21) | -0.17(0.38)          | -0.82(0.23)  | -0.65(0.42)   | 6.62E-01     | 7.72E-04     | 1.28E-01      | 9.95E-01     | 5.82E-02     | 4.91E-01      |
| 1-monostearin          | 0.16(0.16)    | 0.13(0.11)  | -0.62(0.17) | -0.02(0.20)          | -0.77(0.23)  | -0.75(0.20)   | 9.06E-01     | 1.44E-03     | 4.74E-04      | 9.95E-01     | 9.02E-02     | 4.47E-02      |
| Fumaric acid           | -0.03(0.10)   | 0.07(0.33)  | -0.83(0.24) | 0.09(0.34)           | -0.80(0.26)  | -0.89(0.40)   | 7.89E-01     | 2.90E-03     | 3.03E-02      | 9.95E-01     | 1.21E-01     | 2.57E-01      |
| Pyrophosphate          | 0.01(0.09)    | 0.32(0.76)  | -1.39(0.46) | 0.32(0.77)           | -1.40(0.47)  | -1.71(0.90)   | 6.83E-01     | 4.47E-03     | 6.01E-02      | 9.95E-01     | 1.53E-01     | 3.33E-01      |
| Shikimic acid          | 0.00(0.13)    | 0.07(0.14)  | -0.63(0.17) | 0.07(0.19)           | -0.63(0.22)  | -0.70(0.21)   | 7.25E-01     | 4.73E-03     | 1.57E-03      | 9.95E-01     | 1.53E-01     | 6.59E-02      |
| Oxoproline             | -0.05(0.16)   | -0.30(0.13) | -0.61(0.11) | -0.25(0.20)          | -0.56(0.19)  | -0.31(0.17)   | 2.30E-01     | 5.15E-03     | 7.31E-02      | 9.95E-01     | 1.53E-01     | 3.67E-01      |
| Parabanic acid NIST    | -0.03(0.11)   | 0.10(0.16)  | -0.75(0.22) | 0.13(0.19)           | -0.72(0.25)  | -0.86(0.27)   | 4.85E-01     | 5.56E-03     | 2.69E-03      | 9.95E-01     | 1.53E-01     | 7.72E-02      |
| Tocopherol gamma-      | -0.02(0.19)   | -0.16(0.10) | -1.42(0.45) | -0.14(0.22)          | -1.40(0.49)  | -1.26(0.46)   | 5.37E-01     | 6.16E-03     | 8.18E-03      | 9.95E-01     | 1.53E-01     | 1.29E-01      |
| Lactic acid            | 0.09(0.11)    | -0.22(0.23) | 0.71(0.19)  | -0.31(0.25)          | 0.63(0.22)   | 0.94(0.30)    | 2.26E-01     | 6.40E-03     | 2.63E-03      | 9.95E-01     | 1.53E-01     | 7.72E-02      |
| Phosphoethanolamine    | 0.04(0.19)    | 0.07(0.13)  | -0.56(0.13) | 0.03(0.22)           | -0.60(0.22)  | -0.63(0.18)   | 8.81E-01     | 9.06E-03     | 7.63E-04      | 9.95E-01     | 1.71E-01     | 4.79E-02      |
| 2-hydroxyglutaric acid | -0.05(0.12)   | -0.28(0.26) | -0.51(0.13) | -0.23(0.28)          | -0.46(0.18)  | -0.23(0.30)   | 4.12E-01     | 1.14E-02     | 4.42E-01      | 9.95E-01     | 1.81E-01     | 7.54E-01      |
| Glycerol               | -0.04(0.15)   | -0.15(0.15) | 0.47(0.14)  | -0.11(0.21)          | 0.52(0.20)   | 0.62(0.20)    | 6.05E-01     | 1.29E-02     | 2.85E-03      | 9.95E-01     | 1.87E-01     | 7.72E-02      |
| Indole-3-lactate       | 0.11(0.14)    | -0.14(0.18) | -0.39(0.14) | -0.25(0.23)          | -0.50(0.20)  | -0.25(0.23)   | 2.69E-01     | 1.72E-02     | 2.87E-01      | 9.95E-01     | 2.24E-01     | 6.29E-01      |
| Maltotriose            | 0.07(0.21)    | 0.00(0.12)  | -0.53(0.14) | -0.07(0.24)          | -0.60(0.25)  | -0.53(0.18)   | 7.77E-01     | 1.79E-02     | 4.71E-03      | 9.95E-01     | 2.24E-01     | 9.87E-02      |
| Glycine                | -0.08(0.14)   | -0.35(0.32) | -0.55(0.13) | -0.27(0.34)          | -0.46(0.19)  | -0.19(0.33)   | 4.31E-01     | 1.82E-02     | 5.71E-01      | 9.95E-01     | 2.24E-01     | 8.41E-01      |
| Pelargonic acid        | -0.01(0.13)   | 0.07(0.21)  | -0.51(0.16) | 0.08(0.25)           | -0.50(0.21)  | -0.58(0.26)   | 7.33E-01     | 1.91E-02     | 2.78E-02      | 9.95E-01     | 2.24E-01     | 2.57E-01      |
| Lactulose              | 0.02(0.11)    | 0.25(0.23)  | 0.69(0.28)  | 0.23(0.25)           | 0.67(0.30)   | 0.45(0.36)    | 3.73E-01     | 2.93E-02     | 2.25E-01      | 9.95E-01     | 3.08E-01     | 5.84E-01      |
| Pentadecanoic acid     | 0.10(0.17)    | 0.09(0.19)  | -0.36(0.12) | -0.00(0.26)          | -0.46(0.21)  | -0.46(0.23)   | 9.89E-01     | 3.03E-02     | 4.78E-02      | 9.96E-01     | 3.08E-01     | 2.88E-01      |
| Xylose                 | -0.01(0.10)   | -0.15(0.30) | 0.89(0.40)  | -0.14(0.31)          | 0.90(0.41)   | 1.04(0.50)    | 6.66E-01     | 3.11E-02     | 4.21E-02      | 9.95E-01     | 3.08E-01     | 2.78E-01      |
| UDP GlcNAc             | 0.01(0.12)    | 0.06(0.19)  | -0.41(0.17) | 0.06(0.23)           | -0.41(0.21)  | -0.47(0.26)   | 8.05E-01     | 4.96E-02     | 7.65E-02      | 9.95E-01     | 4.45E-01     | 3.73E-01      |
| 3-aminoisobutyric acid | 0.12(0.23)    | -0.13(0.21) | -0.38(0.12) | -0.24(0.31)          | -0.50(0.26)  | -0.25(0.23)   | 4.28E-01     | 5.76E-02     | 2.82E-01      | 9.95E-01     | 4.92E-01     | 6.22E-01      |
| 1-monopalmitin         | -0.02(0.22)   | 0.03(0.10)  | -0.81(0.35) | 0.05(0.24)           | -0.79(0.42)  | -0.84(0.36)   | 8.39E-01     | 6.13E-02     | 2.34E-02      | 9.95E-01     | 4.92E-01     | 2.54E-01      |
| Mannitol               | -0.01(0.11)   | 0.10(0.17)  | 0.67(0.36)  | 0.11(0.20)           | 0.69(0.38)   | 0.57(0.40)    | 5.80E-01     | 7.17E-02     | 1.51E-01      | 9.95E-01     | 5.20E-01     | 5.15E-01      |

|                                                      |             |             |             |             |             |             |          |          |          |          |          |          |
|------------------------------------------------------|-------------|-------------|-------------|-------------|-------------|-------------|----------|----------|----------|----------|----------|----------|
| Sorbitol                                             | -0.22(1.10) | 0.05(0.09)  | 2.22(0.79)  | 0.27(1.10)  | 2.44(1.34)  | 2.16(0.79)  | 8.04E-01 | 7.41E-02 | 8.19E-03 | 9.95E-01 | 5.22E-01 | 1.29E-01 |
| Benzoic acid                                         | 0.05(0.12)  | -0.17(0.25) | -0.91(0.51) | -0.22(0.28) | -0.96(0.53) | -0.74(0.57) | 4.32E-01 | 7.47E-02 | 1.97E-01 | 9.95E-01 | 5.22E-01 | 5.49E-01 |
| Proline                                              | 0.08(0.23)  | 0.01(0.10)  | -0.86(0.48) | -0.06(0.25) | -0.94(0.53) | -0.88(0.49) | 8.02E-01 | 7.98E-02 | 7.61E-02 | 9.95E-01 | 5.37E-01 | 3.73E-01 |
| Oleic acid                                           | -0.04(0.15) | -0.13(0.25) | 0.29(0.12)  | -0.09(0.29) | 0.34(0.19)  | 0.43(0.27)  | 7.60E-01 | 8.80E-02 | 1.21E-01 | 9.95E-01 | 5.44E-01 | 4.84E-01 |
| 3-hydroxybutyric acid                                | 0.01(0.15)  | -0.01(0.12) | 0.61(0.31)  | -0.02(0.19) | 0.60(0.35)  | 0.62(0.33)  | 9.37E-01 | 8.97E-02 | 6.97E-02 | 9.95E-01 | 5.44E-01 | 3.67E-01 |
| Urea                                                 | -0.06(0.13) | -0.06(0.13) | -0.66(0.33) | -0.01(0.19) | -0.61(0.36) | -0.60(0.36) | 9.73E-01 | 9.28E-02 | 9.82E-02 | 9.95E-01 | 5.44E-01 | 4.31E-01 |
| Pyruvic acid                                         | -0.14(0.21) | -0.03(0.14) | 0.28(0.13)  | 0.11(0.25)  | 0.42(0.25)  | 0.31(0.19)  | 6.71E-01 | 9.39E-02 | 1.13E-01 | 9.95E-01 | 5.44E-01 | 4.65E-01 |
| Aspartic acid                                        | -0.02(0.17) | 0.02(0.21)  | -0.38(0.13) | 0.04(0.26)  | -0.36(0.21) | -0.40(0.25) | 8.73E-01 | 1.00E-01 | 1.13E-01 | 9.95E-01 | 5.44E-01 | 4.65E-01 |
| Glutamine                                            | 0.14(0.22)  | 0.04(0.13)  | -0.33(0.17) | -0.10(0.25) | -0.46(0.28) | -0.36(0.21) | 6.81E-01 | 1.07E-01 | 9.48E-02 | 9.95E-01 | 5.44E-01 | 4.30E-01 |
| Butane-2,3-diol NIST                                 | -0.01(0.16) | 0.23(0.22)  | -0.38(0.17) | 0.24(0.27)  | -0.37(0.23) | -0.61(0.27) | 3.91E-01 | 1.09E-01 | 3.04E-02 | 9.95E-01 | 5.44E-01 | 2.57E-01 |
| 2-hydroxypyrazinyl-2-propenoic acid ethyl ester NIST | -0.13(0.14) | 0.09(0.19)  | -0.45(0.14) | 0.22(0.23)  | -0.33(0.20) | -0.54(0.23) | 3.55E-01 | 1.13E-01 | 2.36E-02 | 9.95E-01 | 5.44E-01 | 2.54E-01 |
| Maltose                                              | 0.49(0.63)  | 0.03(0.10)  | -0.92(0.62) | -0.46(0.63) | -1.41(0.88) | -0.95(0.63) | 4.68E-01 | 1.14E-01 | 1.36E-01 | 9.95E-01 | 5.44E-01 | 4.93E-01 |
| Fructose                                             | 0.12(0.33)  | 0.05(0.10)  | 1.28(0.64)  | -0.07(0.34) | 1.16(0.73)  | 1.23(0.65)  | 8.38E-01 | 1.16E-01 | 6.23E-02 | 9.95E-01 | 5.44E-01 | 3.40E-01 |
| Creatinine                                           | 0.05(0.09)  | 0.41(0.79)  | -0.73(0.49) | 0.36(0.79)  | -0.78(0.50) | -1.14(0.91) | 6.53E-01 | 1.24E-01 | 2.18E-01 | 9.95E-01 | 5.44E-01 | 5.73E-01 |
| 3-(1-pyrazolyl)-L-alanine                            | -0.08(0.34) | 0.00(0.09)  | -0.79(0.28) | 0.08(0.35)  | -0.70(0.45) | -0.78(0.29) | 8.19E-01 | 1.24E-01 | 9.39E-03 | 9.95E-01 | 5.44E-01 | 1.42E-01 |
| Isothreonic acid                                     | -0.13(0.16) | -0.20(0.21) | 0.19(0.14)  | -0.08(0.26) | 0.32(0.21)  | 0.40(0.26)  | 7.65E-01 | 1.34E-01 | 1.26E-01 | 9.95E-01 | 5.60E-01 | 4.91E-01 |
| Allantoic acid                                       | 0.23(0.37)  | 0.15(0.15)  | -0.38(0.18) | -0.08(0.40) | -0.61(0.41) | -0.53(0.23) | 8.39E-01 | 1.39E-01 | 2.17E-02 | 9.95E-01 | 5.64E-01 | 2.54E-01 |
| Palmitic acid                                        | -0.01(0.16) | 0.05(0.13)  | 0.36(0.20)  | 0.06(0.21)  | 0.38(0.26)  | 0.32(0.24)  | 7.67E-01 | 1.52E-01 | 1.99E-01 | 9.95E-01 | 6.01E-01 | 5.49E-01 |
| Glutamic acid                                        | 0.07(0.14)  | 0.16(0.16)  | 0.41(0.19)  | 0.09(0.21)  | 0.34(0.24)  | 0.25(0.25)  | 6.75E-01 | 1.61E-01 | 3.28E-01 | 9.95E-01 | 6.19E-01 | 6.63E-01 |
| Adenosine-5-monophosphate                            | 0.06(0.26)  | -0.01(0.19) | -0.33(0.11) | -0.07(0.32) | -0.40(0.29) | -0.33(0.22) | 8.29E-01 | 1.73E-01 | 1.36E-01 | 9.95E-01 | 6.20E-01 | 4.93E-01 |
| Kynurenine                                           | -0.04(0.30) | 0.06(0.10)  | -0.59(0.28) | 0.09(0.32)  | -0.56(0.41) | -0.65(0.30) | 7.69E-01 | 1.77E-01 | 3.17E-02 | 9.95E-01 | 6.20E-01 | 2.57E-01 |
| Capric acid                                          | 0.00(0.15)  | 0.13(0.19)  | -0.35(0.21) | 0.13(0.25)  | -0.35(0.26) | -0.49(0.28) | 5.92E-01 | 1.82E-01 | 8.84E-02 | 9.95E-01 | 6.20E-01 | 4.11E-01 |
| Hypoxanthine                                         | 0.05(0.10)  | 0.16(0.31)  | -0.33(0.26) | 0.11(0.33)  | -0.38(0.28) | -0.49(0.41) | 7.44E-01 | 1.83E-01 | 2.35E-01 | 9.95E-01 | 6.20E-01 | 5.89E-01 |
| Salicylic acid                                       | -0.03(0.10) | 0.20(0.39)  | 0.36(0.28)  | 0.24(0.40)  | 0.40(0.30)  | 0.16(0.48)  | 5.53E-01 | 1.89E-01 | 7.41E-01 | 9.95E-01 | 6.24E-01 | 9.11E-01 |
| Palmitoleic acid                                     | -0.04(0.13) | -0.03(0.27) | 0.21(0.15)  | 0.02(0.30)  | 0.25(0.19)  | 0.23(0.30)  | 9.58E-01 | 1.98E-01 | 4.43E-01 | 9.95E-01 | 6.37E-01 | 7.54E-01 |
| Uric acid                                            | 0.13(0.32)  | -0.10(0.18) | -0.31(0.12) | -0.23(0.37) | -0.44(0.34) | -0.21(0.21) | 5.36E-01 | 1.99E-01 | 3.22E-01 | 9.95E-01 | 6.37E-01 | 6.63E-01 |
| Ribonic acid                                         | 0.01(0.15)  | -0.02(0.24) | 0.37(0.23)  | -0.03(0.29) | 0.35(0.27)  | 0.38(0.33)  | 9.10E-01 | 2.03E-01 | 2.46E-01 | 9.95E-01 | 6.37E-01 | 6.07E-01 |
| Caprylic acid                                        | -0.10(0.15) | -0.05(0.19) | -0.37(0.15) | 0.06(0.24)  | -0.27(0.21) | -0.33(0.23) | 8.17E-01 | 2.06E-01 | 1.65E-01 | 9.95E-01 | 6.37E-01 | 5.34E-01 |

|                               |             |             |             |             |             |             |          |          |          |          |          |          |
|-------------------------------|-------------|-------------|-------------|-------------|-------------|-------------|----------|----------|----------|----------|----------|----------|
| Lauric acid                   | 0.05(0.15)  | -0.03(0.14) | -0.33(0.27) | -0.09(0.21) | -0.39(0.31) | -0.30(0.31) | 6.73E-01 | 2.16E-01 | 3.29E-01 | 9.95E-01 | 6.46E-01 | 6.63E-01 |
| 2,4-diaminobutyric acid       | 0.05(0.13)  | 0.19(0.21)  | -0.19(0.16) | 0.14(0.25)  | -0.24(0.20) | -0.38(0.26) | 5.84E-01 | 2.28E-01 | 1.50E-01 | 9.95E-01 | 6.76E-01 | 5.15E-01 |
| Dodecanol                     | -0.10(0.15) | 0.01(0.18)  | -0.33(0.13) | 0.10(0.24)  | -0.23(0.20) | -0.34(0.23) | 6.70E-01 | 2.53E-01 | 1.41E-01 | 9.95E-01 | 7.02E-01 | 4.96E-01 |
| Glucose                       | -0.11(0.22) | 0.47(0.20)  | 0.17(0.11)  | 0.58(0.30)  | 0.28(0.24)  | -0.30(0.23) | 5.33E-02 | 2.55E-01 | 1.93E-01 | 9.95E-01 | 7.02E-01 | 5.49E-01 |
| Hydroxyproline dipeptide NIST | 0.41(0.55)  | -0.78(0.35) | -0.22(0.10) | -1.19(0.66) | -0.64(0.56) | 0.55(0.37)  | 7.44E-02 | 2.58E-01 | 1.35E-01 | 9.95E-01 | 7.06E-01 | 4.93E-01 |
| Glycolic acid                 | 0.05(0.15)  | 0.06(0.16)  | 0.29(0.16)  | 0.01(0.22)  | 0.24(0.21)  | 0.23(0.23)  | 9.68E-01 | 2.71E-01 | 3.22E-01 | 9.95E-01 | 7.19E-01 | 6.63E-01 |
| Cysteine                      | -0.03(0.15) | 0.05(0.23)  | -0.25(0.14) | 0.08(0.26)  | -0.22(0.20) | -0.29(0.26) | 7.68E-01 | 2.87E-01 | 2.64E-01 | 9.95E-01 | 7.22E-01 | 6.19E-01 |
| N-acetylmannosamine           | 0.14(0.22)  | 0.02(0.10)  | 0.56(0.33)  | -0.11(0.24) | 0.42(0.39)  | 0.54(0.35)  | 6.41E-01 | 2.87E-01 | 1.27E-01 | 9.95E-01 | 7.22E-01 | 4.91E-01 |
| Phenylalanine                 | -0.13(0.22) | 0.00(0.16)  | -0.39(0.11) | 0.13(0.27)  | -0.26(0.24) | -0.39(0.19) | 6.26E-01 | 2.88E-01 | 4.81E-02 | 9.95E-01 | 7.22E-01 | 2.88E-01 |
| Gluconic acid                 | 0.04(0.13)  | -0.31(0.12) | 0.53(0.44)  | -0.35(0.18) | 0.48(0.46)  | 0.83(0.45)  | 5.48E-02 | 2.92E-01 | 7.11E-02 | 9.95E-01 | 7.22E-01 | 3.67E-01 |
| Ketohexose                    | 0.01(0.11)  | 0.09(0.18)  | 0.31(0.26)  | 0.08(0.21)  | 0.30(0.29)  | 0.23(0.32)  | 7.09E-01 | 2.94E-01 | 4.77E-01 | 9.95E-01 | 7.22E-01 | 7.65E-01 |
| Hydrocinnamic acid            | 0.03(0.13)  | 0.15(0.20)  | -0.50(0.49) | 0.12(0.24)  | -0.53(0.51) | -0.65(0.52) | 6.20E-01 | 2.95E-01 | 2.17E-01 | 9.95E-01 | 7.22E-01 | 5.73E-01 |
| Tocopherol alpha-             | -0.10(0.25) | -0.18(0.11) | 0.24(0.22)  | -0.08(0.27) | 0.34(0.33)  | 0.42(0.25)  | 7.75E-01 | 3.04E-01 | 9.61E-02 | 9.95E-01 | 7.22E-01 | 4.31E-01 |
| Threonine                     | -0.20(0.17) | 0.15(0.17)  | -0.42(0.12) | 0.35(0.24)  | -0.22(0.22) | -0.57(0.20) | 1.44E-01 | 3.22E-01 | 7.05E-03 | 9.95E-01 | 7.28E-01 | 1.29E-01 |
| Myo-inositol                  | -0.14(0.27) | -0.03(0.17) | 0.15(0.13)  | 0.12(0.32)  | 0.29(0.29)  | 0.18(0.21)  | 7.20E-01 | 3.22E-01 | 4.13E-01 | 9.95E-01 | 7.28E-01 | 7.35E-01 |
| Arachidic acid                | 0.08(0.33)  | -0.03(0.17) | -0.25(0.11) | -0.11(0.37) | -0.33(0.34) | -0.22(0.20) | 7.69E-01 | 3.42E-01 | 2.77E-01 | 9.95E-01 | 7.49E-01 | 6.19E-01 |
| Methionine                    | 0.10(0.40)  | 0.17(0.16)  | -0.31(0.15) | 0.08(0.42)  | -0.40(0.43) | -0.48(0.22) | 8.53E-01 | 3.45E-01 | 3.12E-02 | 9.95E-01 | 7.49E-01 | 2.57E-01 |
| Aconitic acid                 | -0.24(0.30) | -0.43(0.27) | 0.05(0.11)  | -0.19(0.40) | 0.29(0.32)  | 0.49(0.28)  | 6.38E-01 | 3.60E-01 | 9.33E-02 | 9.95E-01 | 7.71E-01 | 4.29E-01 |
| Indole-3-acetate              | 0.15(0.34)  | -0.38(0.25) | -0.18(0.11) | -0.53(0.43) | -0.33(0.36) | 0.20(0.28)  | 2.20E-01 | 3.64E-01 | 4.66E-01 | 9.95E-01 | 7.76E-01 | 7.54E-01 |
| N-acetyloronithine            | 0.03(0.20)  | -0.12(0.14) | -0.29(0.30) | -0.15(0.24) | -0.32(0.36) | -0.17(0.33) | 5.32E-01 | 3.72E-01 | 6.11E-01 | 9.95E-01 | 7.82E-01 | 8.56E-01 |
| Naproxen                      | -0.17(0.45) | 0.04(0.09)  | 2.88(3.42)  | 0.21(0.46)  | 3.05(3.45)  | 2.85(3.42)  | 6.53E-01 | 3.80E-01 | 4.08E-01 | 9.95E-01 | 7.89E-01 | 7.35E-01 |
| Nonadecanoic acid             | -0.19(0.24) | 0.14(0.12)  | -0.44(0.14) | 0.33(0.27)  | -0.25(0.28) | -0.58(0.19) | 2.32E-01 | 3.84E-01 | 2.87E-03 | 9.95E-01 | 7.92E-01 | 7.72E-02 |
| Myristic acid                 | 0.02(0.15)  | -0.01(0.14) | 0.22(0.19)  | -0.03(0.21) | 0.20(0.24)  | 0.23(0.24)  | 8.92E-01 | 3.97E-01 | 3.41E-01 | 9.95E-01 | 8.02E-01 | 6.79E-01 |
| 2-piperidinobenzonitrile NIST | 0.04(0.16)  | 0.05(0.27)  | 0.21(0.13)  | 0.01(0.31)  | 0.18(0.21)  | 0.16(0.30)  | 9.64E-01 | 3.98E-01 | 5.81E-01 | 9.95E-01 | 8.02E-01 | 8.41E-01 |
| 1,5-anhydroglucitol           | -3.35(3.35) | -1.38(0.39) | -0.52(0.07) | 1.96(3.39)  | 2.82(3.35)  | 0.86(0.39)  | 5.64E-01 | 4.03E-01 | 3.26E-02 | 9.95E-01 | 8.02E-01 | 2.57E-01 |
| 4-hydroxyphenylacetic acid    | -0.04(0.31) | 0.36(0.31)  | -0.30(0.10) | 0.39(0.44)  | -0.27(0.32) | -0.66(0.32) | 3.70E-01 | 4.09E-01 | 4.66E-02 | 9.95E-01 | 8.02E-01 | 2.88E-01 |

|                               |             |             |             |             |             |             |          |          |          |          |          |          |
|-------------------------------|-------------|-------------|-------------|-------------|-------------|-------------|----------|----------|----------|----------|----------|----------|
| 2-hydroxyvaleric acid         | -0.04(0.16) | 0.23(0.20)  | 0.21(0.25)  | 0.26(0.27)  | 0.25(0.31)  | -0.01(0.32) | 3.28E-01 | 4.12E-01 | 9.70E-01 | 9.95E-01 | 8.02E-01 | 9.97E-01 |
| Sucrose                       | 0.01(0.16)  | 0.00(0.12)  | 0.48(0.55)  | -0.01(0.20) | 0.47(0.57)  | 0.48(0.56)  | 9.64E-01 | 4.13E-01 | 3.97E-01 | 9.95E-01 | 8.02E-01 | 7.33E-01 |
| Cholesterol                   | -0.11(0.26) | -0.14(0.10) | -0.42(0.28) | -0.03(0.29) | -0.31(0.38) | -0.27(0.30) | 9.10E-01 | 4.19E-01 | 3.59E-01 | 9.95E-01 | 8.02E-01 | 6.96E-01 |
| Behenic acid                  | -0.02(0.18) | 0.19(0.13)  | -0.21(0.15) | 0.21(0.23)  | -0.19(0.24) | -0.40(0.21) | 3.69E-01 | 4.20E-01 | 5.67E-02 | 9.95E-01 | 8.02E-01 | 3.21E-01 |
| Nicotinic acid                | -0.08(0.29) | -0.55(1.18) | -0.32(0.09) | -0.47(1.21) | -0.24(0.30) | 0.23(1.18)  | 7.01E-01 | 4.24E-01 | 8.48E-01 | 9.95E-01 | 8.02E-01 | 9.54E-01 |
| Hydroxylamine                 | 0.06(0.21)  | -0.07(0.13) | -0.14(0.15) | -0.13(0.25) | -0.21(0.26) | -0.07(0.20) | 5.95E-01 | 4.26E-01 | 7.19E-01 | 9.95E-01 | 8.02E-01 | 9.11E-01 |
| Hippuric acid                 | 0.00(0.11)  | -0.10(0.27) | -0.18(0.20) | -0.11(0.29) | -0.19(0.24) | -0.08(0.32) | 7.11E-01 | 4.35E-01 | 8.14E-01 | 9.95E-01 | 8.12E-01 | 9.41E-01 |
| Citric acid                   | -0.01(0.22) | -0.15(0.18) | -0.21(0.15) | -0.15(0.29) | -0.21(0.26) | -0.06(0.23) | 6.15E-01 | 4.40E-01 | 7.94E-01 | 9.95E-01 | 8.14E-01 | 9.35E-01 |
| Conduritol-beta-expo-<br>xide | -0.09(0.14) | -0.01(0.18) | -0.25(0.15) | 0.08(0.23)  | -0.16(0.21) | -0.24(0.23) | 7.26E-01 | 4.43E-01 | 3.10E-01 | 9.95E-01 | 8.14E-01 | 6.60E-01 |
| Glycerol-alpha-phosph-<br>ate | 0.12(0.14)  | 0.05(0.16)  | 0.28(0.16)  | -0.06(0.22) | 0.17(0.22)  | 0.23(0.23)  | 7.77E-01 | 4.48E-01 | 3.27E-01 | 9.95E-01 | 8.20E-01 | 6.63E-01 |
| Leucine                       | -0.02(0.14) | -0.18(0.20) | -0.18(0.16) | -0.15(0.24) | -0.16(0.21) | 0.00(0.26)  | 5.24E-01 | 4.57E-01 | 9.89E-01 | 9.95E-01 | 8.20E-01 | 9.97E-01 |
| Cystine                       | 0.24(0.34)  | 0.04(0.10)  | 0.52(0.19)  | -0.19(0.35) | 0.29(0.39)  | 0.48(0.22)  | 5.90E-01 | 4.62E-01 | 3.18E-02 | 9.95E-01 | 8.20E-01 | 2.57E-01 |
| Glyceric acid                 | -0.03(0.09) | 0.69(1.05)  | -0.63(0.80) | 0.73(1.05)  | -0.60(0.81) | -1.32(1.34) | 4.93E-01 | 4.64E-01 | 3.27E-01 | 9.95E-01 | 8.20E-01 | 6.63E-01 |
| Erythritol                    | 0.32(0.61)  | -0.08(0.53) | -0.12(0.09) | -0.40(0.81) | -0.44(0.62) | -0.05(0.54) | 6.26E-01 | 4.77E-01 | 9.33E-01 | 9.95E-01 | 8.29E-01 | 9.97E-01 |
| N-acetylglycine NIST          | -0.10(0.33) | 0.17(0.19)  | -0.34(0.12) | 0.27(0.37)  | -0.25(0.36) | -0.51(0.22) | 4.78E-01 | 4.90E-01 | 2.27E-02 | 9.95E-01 | 8.36E-01 | 2.54E-01 |
| Heptadecanoic acid            | -0.02(0.16) | 0.05(0.13)  | -0.21(0.25) | 0.07(0.20)  | -0.19(0.29) | -0.26(0.28) | 7.24E-01 | 5.16E-01 | 3.45E-01 | 9.95E-01 | 8.56E-01 | 6.80E-01 |
| Tyrosine                      | -0.06(0.18) | 0.15(0.17)  | -0.20(0.14) | 0.21(0.25)  | -0.14(0.23) | -0.35(0.22) | 4.01E-01 | 5.43E-01 | 1.08E-01 | 9.95E-01 | 8.69E-01 | 4.53E-01 |
| Linoleic acid                 | -0.05(0.21) | -0.12(0.24) | 0.10(0.11)  | -0.08(0.32) | 0.14(0.24)  | 0.22(0.26)  | 8.16E-01 | 5.46E-01 | 3.92E-01 | 9.95E-01 | 8.69E-01 | 7.32E-01 |
| Threonic acid                 | -0.20(0.19) | 0.13(0.15)  | -0.34(0.15) | 0.33(0.24)  | -0.14(0.23) | -0.47(0.21) | 1.87E-01 | 5.47E-01 | 3.33E-02 | 9.95E-01 | 8.69E-01 | 2.57E-01 |
| Isocitric acid                | -0.03(0.19) | -0.16(0.18) | 0.11(0.14)  | -0.13(0.26) | 0.14(0.24)  | 0.27(0.22)  | 6.24E-01 | 5.48E-01 | 2.29E-01 | 9.95E-01 | 8.69E-01 | 5.84E-01 |
| Tagatose                      | -0.02(0.10) | 0.79(0.60)  | 0.42(0.75)  | 0.81(0.60)  | 0.44(0.75)  | -0.37(0.95) | 1.83E-01 | 5.63E-01 | 6.98E-01 | 9.95E-01 | 8.69E-01 | 9.07E-01 |
| Pseudo uridine                | -0.04(0.20) | -0.19(0.22) | -0.18(0.14) | -0.15(0.30) | -0.14(0.24) | 0.01(0.26)  | 6.27E-01 | 5.66E-01 | 9.67E-01 | 9.95E-01 | 8.69E-01 | 9.97E-01 |
| Serine                        | -0.31(0.22) | -0.19(0.21) | -0.45(0.13) | 0.12(0.28)  | -0.14(0.24) | -0.26(0.24) | 6.60E-01 | 5.67E-01 | 2.76E-01 | 9.95E-01 | 8.69E-01 | 6.19E-01 |
| Galactose                     | 0.05(0.25)  | -0.02(0.14) | -0.11(0.13) | -0.08(0.29) | -0.16(0.28) | -0.08(0.19) | 7.89E-01 | 5.67E-01 | 6.62E-01 | 9.95E-01 | 8.69E-01 | 8.85E-01 |
| Hexitol                       | -0.03(0.12) | 0.14(0.18)  | 0.13(0.26)  | 0.17(0.22)  | 0.16(0.29)  | -0.01(0.32) | 4.37E-01 | 5.83E-01 | 9.79E-01 | 9.95E-01 | 8.69E-01 | 9.97E-01 |
| Galactonic acid               | 0.04(0.34)  | 0.02(0.13)  | 0.24(0.14)  | -0.02(0.36) | 0.20(0.37)  | 0.22(0.18)  | 9.58E-01 | 5.83E-01 | 2.29E-01 | 9.95E-01 | 8.69E-01 | 5.84E-01 |
| Phosphate                     | -0.15(0.19) | -0.11(0.19) | -0.28(0.14) | 0.04(0.26)  | -0.13(0.23) | -0.17(0.23) | 8.67E-01 | 5.86E-01 | 4.62E-01 | 9.95E-01 | 8.69E-01 | 7.54E-01 |
| Pipecolic acid                | -0.04(0.18) | 0.08(0.17)  | 0.09(0.17)  | 0.12(0.25)  | 0.13(0.24)  | 0.01(0.24)  | 6.34E-01 | 5.90E-01 | 9.62E-01 | 9.95E-01 | 8.69E-01 | 9.97E-01 |
| Oxamic acid                   | -0.02(0.09) | 3.87(2.74)  | -1.55(2.85) | 3.89(2.75)  | -1.53(2.85) | -5.42(4.05) | 1.62E-01 | 5.92E-01 | 1.86E-01 | 9.95E-01 | 8.69E-01 | 5.49E-01 |

|                                 |             |             |             |             |             |             |          |          |          |          |          |          |
|---------------------------------|-------------|-------------|-------------|-------------|-------------|-------------|----------|----------|----------|----------|----------|----------|
| Ethanolamine                    | -0.22(0.30) | -0.05(0.31) | -0.05(0.11) | 0.17(0.43)  | 0.17(0.32)  | 0.00(0.33)  | 6.95E-01 | 5.99E-01 | 9.98E-01 | 9.95E-01 | 8.74E-01 | 9.99E-01 |
| Oxalic acid                     | -0.01(0.17) | 0.17(0.15)  | -0.13(0.16) | 0.18(0.23)  | -0.12(0.23) | -0.30(0.22) | 4.35E-01 | 6.00E-01 | 1.83E-01 | 9.95E-01 | 8.74E-01 | 5.49E-01 |
| Dehydroabietic acid             | -0.21(0.26) | -0.11(0.10) | 0.00(0.30)  | 0.09(0.28)  | 0.21(0.40)  | 0.11(0.31)  | 7.37E-01 | 6.05E-01 | 7.18E-01 | 9.95E-01 | 8.74E-01 | 9.11E-01 |
| Methionine sulfoxide            | -0.12(0.20) | 0.07(0.15)  | -0.24(0.14) | 0.20(0.24)  | -0.12(0.24) | -0.31(0.21) | 4.12E-01 | 6.36E-01 | 1.35E-01 | 9.95E-01 | 8.87E-01 | 4.93E-01 |
| Phenylethylamine                | 0.07(0.21)  | -0.08(0.19) | -0.03(0.13) | -0.15(0.28) | -0.11(0.24) | 0.04(0.23)  | 5.89E-01 | 6.52E-01 | 8.51E-01 | 9.95E-01 | 9.01E-01 | 9.54E-01 |
| N-methylalanine                 | -0.09(0.28) | 0.06(0.17)  | 0.05(0.12)  | 0.15(0.33)  | 0.14(0.31)  | -0.01(0.21) | 6.59E-01 | 6.62E-01 | 9.60E-01 | 9.95E-01 | 9.04E-01 | 9.97E-01 |
| Stearic acid                    | -0.04(0.19) | 0.02(0.12)  | -0.18(0.25) | 0.07(0.23)  | -0.13(0.32) | -0.20(0.28) | 7.69E-01 | 6.76E-01 | 4.73E-01 | 9.95E-01 | 9.04E-01 | 7.63E-01 |
| Cellobiose minor                | 0.08(0.46)  | -0.05(0.11) | -0.15(0.32) | -0.13(0.47) | -0.23(0.55) | -0.10(0.33) | 7.79E-01 | 6.79E-01 | 7.75E-01 | 9.95E-01 | 9.04E-01 | 9.34E-01 |
| Histidine                       | 0.53(0.72)  | 0.05(0.13)  | 0.23(0.16)  | -0.48(0.72) | -0.30(0.73) | 0.18(0.20)  | 5.05E-01 | 6.83E-01 | 3.70E-01 | 9.95E-01 | 9.04E-01 | 7.07E-01 |
| Fucose                          | 0.12(0.65)  | 0.05(0.10)  | -0.15(0.24) | -0.07(0.66) | -0.27(0.70) | -0.20(0.25) | 9.13E-01 | 6.96E-01 | 4.33E-01 | 9.95E-01 | 9.04E-01 | 7.51E-01 |
| Beta-alanine                    | -0.03(0.13) | 0.12(0.24)  | -0.11(0.15) | 0.15(0.27)  | -0.08(0.20) | -0.23(0.29) | 5.79E-01 | 6.99E-01 | 4.28E-01 | 9.95E-01 | 9.04E-01 | 7.47E-01 |
| Ornithine                       | -0.05(0.25) | -0.06(0.18) | -0.15(0.15) | -0.01(0.30) | -0.10(0.28) | -0.09(0.23) | 9.71E-01 | 7.10E-01 | 6.88E-01 | 9.95E-01 | 9.04E-01 | 9.06E-01 |
| 2-deoxyisotetronic acid NIST    | 0.09(0.17)  | -0.14(0.15) | 0.17(0.16)  | -0.23(0.23) | 0.08(0.23)  | 0.31(0.22)  | 3.23E-01 | 7.16E-01 | 1.56E-01 | 9.95E-01 | 9.05E-01 | 5.22E-01 |
| Arachidonic acid                | -0.08(0.32) | -0.08(0.36) | 0.04(0.10)  | -0.01(0.47) | 0.12(0.34)  | 0.13(0.37)  | 9.89E-01 | 7.21E-01 | 7.30E-01 | 9.96E-01 | 9.06E-01 | 9.11E-01 |
| Deoxycholic acid                | -0.12(0.30) | 0.10(0.31)  | -0.01(0.10) | 0.22(0.43)  | 0.11(0.31)  | -0.11(0.33) | 6.08E-01 | 7.25E-01 | 7.40E-01 | 9.95E-01 | 9.08E-01 | 9.11E-01 |
| Mannose                         | 0.02(0.32)  | 0.38(0.22)  | 0.12(0.10)  | 0.37(0.39)  | 0.11(0.34)  | -0.26(0.24) | 3.49E-01 | 7.51E-01 | 2.91E-01 | 9.95E-01 | 9.26E-01 | 6.35E-01 |
| Hexuronic acid                  | -0.03(0.18) | 0.03(0.14)  | 0.06(0.21)  | 0.06(0.23)  | 0.09(0.28)  | 0.03(0.26)  | 8.01E-01 | 7.52E-01 | 9.07E-01 | 9.95E-01 | 9.26E-01 | 9.84E-01 |
| Succinic acid                   | 0.01(0.20)  | 0.00(0.20)  | 0.09(0.17)  | -0.01(0.28) | 0.08(0.26)  | 0.09(0.26)  | 9.63E-01 | 7.58E-01 | 7.17E-01 | 9.95E-01 | 9.30E-01 | 9.11E-01 |
| 3,6-anhydro-D-galactose         | 0.05(0.13)  | 0.15(0.22)  | 0.12(0.18)  | 0.10(0.26)  | 0.06(0.22)  | -0.03(0.28) | 7.13E-01 | 7.72E-01 | 9.11E-01 | 9.95E-01 | 9.41E-01 | 9.84E-01 |
| 2,3-dihydroxybutanoic acid NIST | -0.07(0.18) | 0.03(0.18)  | -0.01(0.14) | 0.10(0.25)  | 0.06(0.22)  | -0.04(0.22) | 6.90E-01 | 7.74E-01 | 8.73E-01 | 9.95E-01 | 9.41E-01 | 9.62E-01 |
| UDP-glucuronic acid             | 0.00(0.18)  | 0.06(0.13)  | 0.07(0.17)  | 0.06(0.23)  | 0.07(0.25)  | 0.01(0.22)  | 8.10E-01 | 7.81E-01 | 9.49E-01 | 9.95E-01 | 9.46E-01 | 9.97E-01 |
| Pinitol                         | -0.08(0.47) | -0.01(0.16) | -0.22(0.17) | 0.07(0.50)  | -0.13(0.50) | -0.21(0.24) | 8.87E-01 | 7.89E-01 | 3.87E-01 | 9.95E-01 | 9.49E-01 | 7.27E-01 |
| Valine                          | -0.01(0.14) | -0.16(0.22) | -0.06(0.16) | -0.15(0.26) | -0.06(0.21) | 0.10(0.27)  | 5.61E-01 | 7.90E-01 | 7.22E-01 | 9.95E-01 | 9.49E-01 | 9.11E-01 |
| Lyxitol                         | -0.06(0.11) | -0.13(0.74) | 0.00(0.19)  | -0.07(0.75) | 0.05(0.21)  | 0.13(0.76)  | 9.22E-01 | 8.00E-01 | 8.67E-01 | 9.95E-01 | 9.56E-01 | 9.62E-01 |
| Quinic acid                     | 0.09(0.15)  | -0.11(0.26) | 0.04(0.14)  | -0.19(0.30) | -0.05(0.20) | 0.14(0.30)  | 5.19E-01 | 8.01E-01 | 6.32E-01 | 9.95E-01 | 9.56E-01 | 8.69E-01 |
| Isoleucine                      | 0.03(0.17)  | -0.08(0.18) | -0.02(0.14) | -0.12(0.25) | -0.05(0.23) | 0.06(0.23)  | 6.38E-01 | 8.11E-01 | 7.86E-01 | 9.95E-01 | 9.62E-01 | 9.34E-01 |
| Lysine                          | 0.28(0.36)  | 0.06(0.14)  | 0.19(0.14)  | -0.22(0.39) | -0.09(0.39) | 0.13(0.20)  | 5.78E-01 | 8.22E-01 | 5.21E-01 | 9.95E-01 | 9.65E-01 | 7.99E-01 |
| Xylitol                         | -0.11(0.33) | 0.04(0.56)  | -0.04(0.10) | 0.14(0.65)  | 0.07(0.34)  | -0.07(0.56) | 8.23E-01 | 8.39E-01 | 8.95E-01 | 9.95E-01 | 9.72E-01 | 9.77E-01 |



|                           |             |             |             |             |             |             |          |          |          |          |          |          |
|---------------------------|-------------|-------------|-------------|-------------|-------------|-------------|----------|----------|----------|----------|----------|----------|
| N-acetylglutamate         | -0.09(0.44) | 0.03(0.10)  | 0.01(0.25)  | 0.12(0.45)  | 0.10(0.52)  | -0.02(0.27) | 7.97E-01 | 8.50E-01 | 9.43E-01 | 9.95E-01 | 9.72E-01 | 9.97E-01 |
| Malic acid                | -0.01(0.18) | -0.06(0.15) | 0.03(0.16)  | -0.05(0.24) | 0.04(0.24)  | 0.09(0.23)  | 8.37E-01 | 8.51E-01 | 6.77E-01 | 9.95E-01 | 9.72E-01 | 9.02E-01 |
| 2-hydroxybutanoic acid    | 0.13(0.33)  | 0.14(0.22)  | 0.06(0.10)  | 0.01(0.41)  | -0.06(0.35) | -0.08(0.25) | 9.76E-01 | 8.57E-01 | 7.62E-01 | 9.95E-01 | 9.72E-01 | 9.24E-01 |
| Cysteine-glycine          | 0.23(0.28)  | 0.02(0.14)  | 0.28(0.14)  | -0.22(0.31) | 0.05(0.31)  | 0.27(0.20)  | 4.91E-01 | 8.71E-01 | 1.85E-01 | 9.95E-01 | 9.75E-01 | 5.49E-01 |
| Pyrrole-2-carboxylic acid | 0.00(0.16)  | -0.07(0.18) | 0.03(0.16)  | -0.06(0.24) | 0.03(0.22)  | 0.10(0.24)  | 7.93E-01 | 8.77E-01 | 6.85E-01 | 9.95E-01 | 9.76E-01 | 9.06E-01 |
| Uridine                   | -0.09(0.16) | -0.15(0.15) | -0.06(0.16) | -0.06(0.22) | 0.03(0.23)  | 0.09(0.22)  | 7.99E-01 | 8.89E-01 | 6.89E-01 | 9.95E-01 | 9.80E-01 | 9.06E-01 |
| Alanine                   | -0.02(0.19) | -0.18(0.21) | -0.05(0.12) | -0.15(0.28) | -0.03(0.23) | 0.13(0.24)  | 5.83E-01 | 8.99E-01 | 5.99E-01 | 9.95E-01 | 9.83E-01 | 8.42E-01 |
| Asparagine                | -0.22(0.23) | 0.09(0.17)  | -0.19(0.12) | 0.31(0.27)  | 0.03(0.25)  | -0.28(0.21) | 2.55E-01 | 9.06E-01 | 1.78E-01 | 9.95E-01 | 9.83E-01 | 5.45E-01 |
| Levogluconan              | -0.07(0.25) | 0.06(0.13)  | -0.10(0.14) | 0.13(0.29)  | -0.03(0.29) | -0.17(0.20) | 6.48E-01 | 9.10E-01 | 4.05E-01 | 9.95E-01 | 9.83E-01 | 7.35E-01 |
| Tryptophan                | 0.75(1.24)  | 0.04(0.09)  | 0.89(0.88)  | -0.71(1.25) | 0.13(1.54)  | 0.84(0.89)  | 5.70E-01 | 9.31E-01 | 3.46E-01 | 9.95E-01 | 9.86E-01 | 6.80E-01 |
| Isothreitol               | -0.02(0.22) | -0.38(0.39) | 0.00(0.11)  | -0.36(0.45) | 0.02(0.25)  | 0.38(0.41)  | 4.25E-01 | 9.36E-01 | 3.60E-01 | 9.95E-01 | 9.86E-01 | 6.96E-01 |
| Arabitol                  | -0.01(0.17) | -0.05(0.24) | -0.02(0.13) | -0.04(0.30) | -0.01(0.22) | 0.03(0.27)  | 8.91E-01 | 9.57E-01 | 9.11E-01 | 9.95E-01 | 9.90E-01 | 9.84E-01 |
| Trans-4-hydroxyproline    | 0.07(0.12)  | -0.30(0.24) | 0.07(0.20)  | -0.37(0.26) | -0.01(0.23) | 0.36(0.31)  | 1.61E-01 | 9.69E-01 | 2.46E-01 | 9.95E-01 | 9.90E-01 | 6.07E-01 |
| Acetaminophen             | 0.01(0.39)  | -0.23(0.37) | -0.01(0.10) | -0.23(0.54) | -0.02(0.40) | 0.22(0.38)  | 6.68E-01 | 9.70E-01 | 5.70E-01 | 9.95E-01 | 9.90E-01 | 8.41E-01 |
| Taurine                   | 0.11(0.64)  | -0.50(0.52) | 0.13(0.10)  | -0.60(0.81) | 0.02(0.65)  | 0.63(0.52)  | 4.62E-01 | 9.70E-01 | 2.32E-01 | 9.95E-01 | 9.90E-01 | 5.87E-01 |
| Methanolphosphate         | 0.09(0.25)  | 0.11(0.18)  | 0.10(0.11)  | 0.02(0.31)  | 0.01(0.27)  | -0.01(0.22) | 9.51E-01 | 9.78E-01 | 9.58E-01 | 9.95E-01 | 9.90E-01 | 9.97E-01 |
| 2-deoxytetronic acid      | 0.02(0.24)  | -0.15(0.20) | 0.02(0.12)  | -0.16(0.31) | 0.01(0.27)  | 0.17(0.23)  | 5.99E-01 | 9.80E-01 | 4.61E-01 | 9.95E-01 | 9.90E-01 | 7.54E-01 |
| Alloxanoic acid NIST      | 0.01(0.11)  | 0.00(0.28)  | 0.00(0.38)  | -0.01(0.30) | 0.00(0.39)  | 0.01(0.48)  | 9.69E-01 | 9.94E-01 | 9.85E-01 | 9.95E-01 | 9.97E-01 | 9.97E-01 |
| <b>Unknown</b>            |             |             |             |             |             |             |          |          |          |          |          |          |
| 915                       | -0.11(0.12) | 0.00(0.34)  | -7.56(1.57) | 0.11(0.36)  | -7.45(1.57) | -7.56(1.60) | 7.56E-01 | 1.19E-05 | 1.32E-05 | 9.95E-01 | 4.47E-03 | 4.99E-03 |
| 7440                      | 0.07(0.10)  | -0.22(0.23) | -6.55(1.66) | -0.30(0.25) | -6.62(1.67) | -6.32(1.68) | 2.34E-01 | 1.84E-04 | 3.60E-04 | 9.95E-01 | 2.81E-02 | 4.47E-02 |
| 7403                      | 0.11(0.22)  | 0.04(0.20)  | -3.70(0.95) | -0.07(0.30) | -3.81(0.99) | -3.74(0.97) | 8.17E-01 | 2.98E-04 | 2.60E-04 | 9.95E-01 | 2.81E-02 | 4.47E-02 |
| 5419                      | -0.05(0.14) | 0.05(0.16)  | -0.98(0.26) | 0.10(0.21)  | -0.93(0.29) | -1.03(0.31) | 6.32E-01 | 2.43E-03 | 1.52E-03 | 9.95E-01 | 1.15E-01 | 6.59E-02 |
| 135869                    | -0.01(0.14) | 0.28(0.19)  | 0.71(0.21)  | 0.29(0.23)  | 0.73(0.26)  | 0.44(0.29)  | 2.18E-01 | 6.51E-03 | 1.39E-01 | 9.95E-01 | 1.53E-01 | 4.95E-01 |
| 1148                      | 0.00(0.12)  | 0.08(0.13)  | -1.30(0.44) | 0.08(0.18)  | -1.30(0.46) | -1.38(0.46) | 6.38E-01 | 6.90E-03 | 3.88E-03 | 9.95E-01 | 1.53E-01 | 9.56E-02 |
| 132379                    | 0.08(0.18)  | 0.14(0.16)  | -0.54(0.13) | 0.05(0.25)  | -0.62(0.23) | -0.68(0.21) | 8.30E-01 | 7.69E-03 | 1.78E-03 | 9.95E-01 | 1.61E-01 | 6.70E-02 |
| 5900                      | 0.03(0.12)  | -0.05(0.18) | -0.55(0.17) | -0.07(0.21) | -0.57(0.21) | -0.50(0.25) | 7.43E-01 | 8.72E-03 | 4.54E-02 | 9.95E-01 | 1.71E-01 | 2.88E-01 |
| 93385                     | 0.03(0.14)  | 0.07(0.20)  | -0.59(0.19) | 0.04(0.24)  | -0.62(0.23) | -0.67(0.28) | 8.54E-01 | 1.03E-02 | 1.85E-02 | 9.95E-01 | 1.81E-01 | 2.24E-01 |
| 100253                    | 0.00(0.11)  | 0.04(0.20)  | 0.55(0.18)  | 0.04(0.23)  | 0.55(0.21)  | 0.51(0.26)  | 8.77E-01 | 1.14E-02 | 5.64E-02 | 9.95E-01 | 1.81E-01 | 3.21E-01 |

|        |             |             |             |             |             |             |          |          |          |          |          |          |
|--------|-------------|-------------|-------------|-------------|-------------|-------------|----------|----------|----------|----------|----------|----------|
| 135260 | 0.02(0.12)  | -0.34(0.18) | -0.53(0.17) | -0.36(0.22) | -0.55(0.21) | -0.19(0.25) | 9.99E-02 | 1.15E-02 | 4.61E-01 | 9.95E-01 | 1.81E-01 | 7.54E-01 |
| 121890 | 0.08(0.12)  | 0.05(0.15)  | -0.58(0.23) | -0.03(0.20) | -0.66(0.26) | -0.63(0.28) | 8.81E-01 | 1.25E-02 | 2.60E-02 | 9.95E-01 | 1.87E-01 | 2.57E-01 |
| 42357  | 0.01(0.11)  | 0.01(0.19)  | -0.51(0.18) | 0.01(0.22)  | -0.52(0.22) | -0.53(0.27) | 9.79E-01 | 1.88E-02 | 5.24E-02 | 9.95E-01 | 2.24E-01 | 3.08E-01 |
| 17651  | 0.08(0.15)  | 0.14(0.20)  | -0.37(0.13) | 0.07(0.26)  | -0.45(0.19) | -0.52(0.24) | 7.89E-01 | 1.98E-02 | 3.41E-02 | 9.95E-01 | 2.26E-01 | 2.57E-01 |
| 592    | -0.02(0.13) | -0.07(0.30) | -0.46(0.14) | -0.05(0.33) | -0.44(0.20) | -0.39(0.34) | 8.73E-01 | 2.61E-02 | 2.48E-01 | 9.95E-01 | 2.90E-01 | 6.07E-01 |
| 4863   | 0.08(0.17)  | 0.08(0.29)  | -0.36(0.11) | -0.00(0.33) | -0.44(0.20) | -0.44(0.31) | 9.95E-01 | 3.10E-02 | 1.67E-01 | 9.98E-01 | 3.08E-01 | 5.34E-01 |
| 127277 | -0.05(0.16) | 0.22(0.20)  | -0.50(0.15) | 0.27(0.26)  | -0.45(0.22) | -0.72(0.25) | 2.99E-01 | 4.23E-02 | 5.02E-03 | 9.95E-01 | 4.00E-01 | 9.96E-02 |
| 1941   | 0.10(0.16)  | 0.23(0.19)  | -0.33(0.13) | 0.13(0.25)  | -0.43(0.21) | -0.56(0.23) | 5.99E-01 | 4.25E-02 | 1.53E-02 | 9.95E-01 | 4.00E-01 | 2.03E-01 |
| 13107  | -0.01(0.22) | -0.30(0.12) | -0.56(0.16) | -0.29(0.25) | -0.55(0.27) | -0.26(0.20) | 2.39E-01 | 4.79E-02 | 2.00E-01 | 9.95E-01 | 4.40E-01 | 5.49E-01 |
| 1700   | -0.02(0.13) | 0.10(0.18)  | -0.51(0.22) | 0.11(0.22)  | -0.50(0.26) | -0.61(0.29) | 6.14E-01 | 5.92E-02 | 4.03E-02 | 9.95E-01 | 4.92E-01 | 2.71E-01 |
| 17537  | 0.08(0.10)  | -0.17(0.33) | -0.40(0.23) | -0.25(0.34) | -0.48(0.25) | -0.23(0.40) | 4.59E-01 | 6.12E-02 | 5.74E-01 | 9.95E-01 | 4.92E-01 | 8.41E-01 |
| 1875   | 0.05(0.15)  | -0.30(0.12) | -0.44(0.21) | -0.35(0.19) | -0.49(0.26) | -0.14(0.24) | 7.01E-02 | 6.31E-02 | 5.64E-01 | 9.95E-01 | 4.92E-01 | 8.41E-01 |
| 1704   | 0.04(0.12)  | 0.07(0.21)  | 0.61(0.27)  | 0.03(0.25)  | 0.57(0.30)  | 0.54(0.33)  | 9.14E-01 | 6.36E-02 | 1.07E-01 | 9.95E-01 | 4.92E-01 | 4.53E-01 |
| 134336 | -0.07(0.14) | 0.06(0.24)  | -0.42(0.12) | 0.14(0.28)  | -0.35(0.18) | -0.48(0.26) | 6.25E-01 | 6.40E-02 | 7.29E-02 | 9.95E-01 | 4.92E-01 | 3.67E-01 |
| 448    | 0.05(0.19)  | -0.12(0.15) | -0.40(0.15) | -0.17(0.24) | -0.46(0.24) | -0.29(0.22) | 4.81E-01 | 6.61E-02 | 1.96E-01 | 9.95E-01 | 4.98E-01 | 5.49E-01 |
| 2061   | -0.06(0.14) | -0.14(0.20) | -0.44(0.15) | -0.08(0.24) | -0.38(0.21) | -0.30(0.24) | 7.29E-01 | 6.93E-02 | 2.27E-01 | 9.95E-01 | 5.12E-01 | 5.84E-01 |
| 41689  | -0.07(0.21) | 0.21(0.18)  | 0.36(0.13)  | 0.29(0.27)  | 0.43(0.24)  | 0.14(0.21)  | 2.90E-01 | 7.64E-02 | 5.00E-01 | 9.95E-01 | 5.23E-01 | 7.82E-01 |
| 16788  | -0.03(0.13) | 0.08(0.16)  | -0.44(0.19) | 0.12(0.21)  | -0.41(0.23) | -0.53(0.25) | 5.80E-01 | 8.25E-02 | 3.84E-02 | 9.95E-01 | 5.44E-01 | 2.65E-01 |
| 9392   | 0.14(0.19)  | 0.00(0.12)  | 0.58(0.17)  | -0.14(0.23) | 0.44(0.26)  | 0.58(0.21)  | 5.50E-01 | 9.14E-02 | 8.09E-03 | 9.95E-01 | 5.44E-01 | 1.29E-01 |
| 119023 | 0.05(0.37)  | 0.05(0.10)  | -0.87(0.40) | -0.00(0.39) | -0.92(0.54) | -0.92(0.42) | 9.98E-01 | 9.26E-02 | 3.09E-02 | 9.98E-01 | 5.44E-01 | 2.57E-01 |
| 64546  | -0.08(0.21) | 0.34(0.22)  | 0.32(0.10)  | 0.42(0.30)  | 0.40(0.24)  | -0.02(0.24) | 1.63E-01 | 9.36E-02 | 9.40E-01 | 9.95E-01 | 5.44E-01 | 9.97E-01 |
| 46292  | -0.04(0.19) | -0.08(0.16) | -0.43(0.14) | -0.04(0.24) | -0.39(0.23) | -0.35(0.21) | 8.62E-01 | 9.70E-02 | 9.94E-02 | 9.95E-01 | 5.44E-01 | 4.31E-01 |
| 5346   | 0.06(0.11)  | 0.05(0.28)  | -0.34(0.22) | -0.01(0.30) | -0.40(0.24) | -0.39(0.35) | 9.73E-01 | 1.04E-01 | 2.71E-01 | 9.95E-01 | 5.44E-01 | 6.19E-01 |
| 3029   | 0.01(0.18)  | 0.05(0.26)  | 0.36(0.11)  | 0.03(0.31)  | 0.34(0.21)  | 0.31(0.28)  | 9.15E-01 | 1.04E-01 | 2.69E-01 | 9.95E-01 | 5.44E-01 | 6.19E-01 |
| 2806   | -0.06(0.11) | -0.41(0.71) | -0.92(0.51) | -0.35(0.72) | -0.86(0.52) | -0.51(0.89) | 6.30E-01 | 1.06E-01 | 5.67E-01 | 9.95E-01 | 5.44E-01 | 8.41E-01 |
| 98027  | 0.03(0.38)  | 0.01(0.13)  | -0.65(0.18) | -0.03(0.41) | -0.69(0.43) | -0.66(0.22) | 9.51E-01 | 1.11E-01 | 4.24E-03 | 9.95E-01 | 5.44E-01 | 9.56E-02 |
| 4937   | 0.17(0.17)  | 0.14(0.22)  | -0.19(0.14) | -0.03(0.28) | -0.36(0.22) | -0.33(0.26) | 9.11E-01 | 1.13E-01 | 2.19E-01 | 9.95E-01 | 5.44E-01 | 5.73E-01 |
| 6646   | -0.14(0.25) | 0.38(0.21)  | 0.29(0.10)  | 0.52(0.34)  | 0.43(0.27)  | -0.09(0.24) | 1.25E-01 | 1.15E-01 | 6.97E-01 | 9.95E-01 | 5.44E-01 | 9.07E-01 |
| 4948   | -0.03(0.14) | 0.40(0.42)  | 0.26(0.12)  | 0.43(0.44)  | 0.29(0.18)  | -0.14(0.43) | 3.31E-01 | 1.15E-01 | 7.40E-01 | 9.95E-01 | 5.44E-01 | 9.11E-01 |
| 3465   | -0.06(0.14) | 0.22(0.21)  | 0.28(0.16)  | 0.27(0.25)  | 0.34(0.21)  | 0.07(0.26)  | 2.87E-01 | 1.17E-01 | 8.06E-01 | 9.95E-01 | 5.44E-01 | 9.41E-01 |

|        |             |             |             |             |             |             |          |          |          |          |          |          |
|--------|-------------|-------------|-------------|-------------|-------------|-------------|----------|----------|----------|----------|----------|----------|
| 4942   | 0.28(0.34)  | 0.00(0.10)  | -0.48(0.34) | -0.29(0.36) | -0.77(0.49) | -0.48(0.36) | 4.27E-01 | 1.18E-01 | 1.80E-01 | 9.95E-01 | 5.44E-01 | 5.47E-01 |
| 4945   | 0.01(0.11)  | 0.12(0.25)  | -0.41(0.24) | 0.11(0.27)  | -0.42(0.26) | -0.53(0.35) | 6.92E-01 | 1.21E-01 | 1.34E-01 | 9.95E-01 | 5.44E-01 | 4.93E-01 |
| 61     | 0.03(0.31)  | -0.01(0.21) | -0.48(0.09) | -0.03(0.38) | -0.51(0.33) | -0.47(0.22) | 9.28E-01 | 1.23E-01 | 3.87E-02 | 9.95E-01 | 5.44E-01 | 2.65E-01 |
| 6331   | 0.06(0.20)  | 0.09(0.18)  | -0.33(0.14) | 0.03(0.28)  | -0.39(0.25) | -0.41(0.23) | 9.25E-01 | 1.23E-01 | 8.25E-02 | 9.95E-01 | 5.44E-01 | 3.89E-01 |
| 17453  | 0.10(0.47)  | 0.01(0.10)  | -0.85(0.38) | -0.09(0.48) | -0.95(0.61) | -0.86(0.40) | 8.53E-01 | 1.24E-01 | 3.40E-02 | 9.95E-01 | 5.44E-01 | 2.57E-01 |
| 91     | -0.08(0.16) | 0.05(0.13)  | -0.46(0.19) | 0.13(0.21)  | -0.38(0.25) | -0.52(0.22) | 5.15E-01 | 1.26E-01 | 2.50E-02 | 9.95E-01 | 5.44E-01 | 2.57E-01 |
| 473    | -0.06(0.12) | 0.06(0.61)  | 0.27(0.20)  | 0.12(0.61)  | 0.33(0.22)  | 0.21(0.64)  | 8.48E-01 | 1.28E-01 | 7.37E-01 | 9.95E-01 | 5.47E-01 | 9.11E-01 |
| 41683  | -0.05(0.14) | 0.40(0.32)  | 0.26(0.15)  | 0.45(0.35)  | 0.31(0.20)  | -0.14(0.35) | 2.02E-01 | 1.32E-01 | 6.91E-01 | 9.95E-01 | 5.59E-01 | 9.06E-01 |
| 95550  | -0.10(0.15) | 0.13(0.19)  | -0.40(0.13) | 0.23(0.24)  | -0.30(0.20) | -0.54(0.23) | 3.30E-01 | 1.35E-01 | 2.54E-02 | 9.95E-01 | 5.60E-01 | 2.57E-01 |
| 47     | -0.06(0.18) | 0.07(0.32)  | -0.36(0.11) | 0.13(0.35)  | -0.30(0.20) | -0.43(0.33) | 7.19E-01 | 1.39E-01 | 1.96E-01 | 9.95E-01 | 5.64E-01 | 5.49E-01 |
| 135610 | -0.24(0.20) | 0.47(0.35)  | 0.09(0.11)  | 0.70(0.41)  | 0.32(0.22)  | -0.38(0.37) | 9.17E-02 | 1.48E-01 | 3.05E-01 | 9.95E-01 | 5.93E-01 | 6.55E-01 |
| 111162 | 0.00(0.14)  | -0.29(0.36) | -0.88(0.59) | -0.29(0.39) | -0.88(0.61) | -0.59(0.70) | 4.54E-01 | 1.53E-01 | 4.02E-01 | 9.95E-01 | 6.01E-01 | 7.35E-01 |
| 4926   | 0.07(0.10)  | 0.15(0.38)  | 0.39(0.20)  | 0.08(0.39)  | 0.32(0.23)  | 0.24(0.43)  | 8.31E-01 | 1.60E-01 | 5.86E-01 | 9.95E-01 | 6.19E-01 | 8.41E-01 |
| 1029   | -0.03(0.16) | 0.13(0.18)  | -0.34(0.15) | 0.16(0.23)  | -0.31(0.22) | -0.47(0.23) | 4.98E-01 | 1.63E-01 | 4.58E-02 | 9.95E-01 | 6.19E-01 | 2.88E-01 |
| 17263  | 0.00(0.13)  | 0.22(0.22)  | -0.30(0.17) | 0.22(0.26)  | -0.30(0.21) | -0.52(0.28) | 4.08E-01 | 1.64E-01 | 7.12E-02 | 9.95E-01 | 6.19E-01 | 3.67E-01 |
| 117141 | -0.03(0.21) | 0.25(0.42)  | -0.35(0.09) | 0.28(0.48)  | -0.32(0.23) | -0.60(0.43) | 5.53E-01 | 1.69E-01 | 1.64E-01 | 9.95E-01 | 6.20E-01 | 5.34E-01 |
| 2001   | 0.00(0.10)  | 0.47(0.54)  | 0.52(0.36)  | 0.48(0.55)  | 0.52(0.38)  | 0.04(0.65)  | 3.89E-01 | 1.73E-01 | 9.49E-01 | 9.95E-01 | 6.20E-01 | 9.97E-01 |
| 5483   | 0.00(0.16)  | -0.01(0.15) | -0.31(0.17) | -0.01(0.22) | -0.31(0.23) | -0.30(0.23) | 9.56E-01 | 1.76E-01 | 1.95E-01 | 9.95E-01 | 6.20E-01 | 5.49E-01 |
| 31357  | -0.07(0.16) | -0.05(0.13) | 0.28(0.20)  | 0.02(0.20)  | 0.34(0.25)  | 0.32(0.23)  | 9.19E-01 | 1.77E-01 | 1.71E-01 | 9.95E-01 | 6.20E-01 | 5.38E-01 |
| 8270   | 0.06(0.12)  | 0.04(0.16)  | 0.40(0.22)  | -0.02(0.20) | 0.34(0.25)  | 0.36(0.27)  | 9.14E-01 | 1.78E-01 | 1.89E-01 | 9.95E-01 | 6.20E-01 | 5.49E-01 |
| 3258   | 0.08(0.14)  | 0.07(0.18)  | -0.20(0.16) | -0.01(0.23) | -0.28(0.21) | -0.27(0.24) | 9.50E-01 | 1.84E-01 | 2.73E-01 | 9.95E-01 | 6.20E-01 | 6.19E-01 |
| 3232   | 0.44(0.47)  | -0.01(0.10) | -0.30(0.27) | -0.45(0.48) | -0.73(0.55) | -0.28(0.29) | 3.50E-01 | 1.85E-01 | 3.27E-01 | 9.95E-01 | 6.20E-01 | 6.63E-01 |
| 257    | -0.07(0.11) | -0.31(0.30) | -0.35(0.18) | -0.24(0.32) | -0.27(0.21) | -0.03(0.35) | 4.55E-01 | 1.98E-01 | 9.23E-01 | 9.95E-01 | 6.37E-01 | 9.94E-01 |
| 62     | -0.05(0.20) | 0.06(0.20)  | -0.35(0.11) | 0.11(0.28)  | -0.30(0.23) | -0.41(0.22) | 6.92E-01 | 2.04E-01 | 6.96E-02 | 9.95E-01 | 6.37E-01 | 3.67E-01 |
| 1872   | 0.05(0.16)  | 0.15(0.22)  | -0.21(0.13) | 0.10(0.27)  | -0.26(0.21) | -0.36(0.26) | 7.12E-01 | 2.04E-01 | 1.68E-01 | 9.95E-01 | 6.37E-01 | 5.34E-01 |
| 41808  | -0.08(0.14) | 0.27(0.21)  | 0.22(0.19)  | 0.35(0.26)  | 0.30(0.23)  | -0.05(0.29) | 1.76E-01 | 2.05E-01 | 8.64E-01 | 9.95E-01 | 6.37E-01 | 9.62E-01 |
| 7718   | -0.10(0.14) | 0.18(0.14)  | -0.38(0.17) | 0.28(0.20)  | -0.28(0.22) | -0.56(0.22) | 1.63E-01 | 2.12E-01 | 1.56E-02 | 9.95E-01 | 6.42E-01 | 2.03E-01 |
| 6580   | -0.15(0.25) | 0.06(0.12)  | 0.24(0.18)  | 0.20(0.27)  | 0.38(0.30)  | 0.18(0.21)  | 4.54E-01 | 2.12E-01 | 3.96E-01 | 9.95E-01 | 6.42E-01 | 7.33E-01 |
| 120562 | 0.05(0.17)  | -0.01(0.14) | -0.26(0.18) | -0.06(0.22) | -0.32(0.25) | -0.25(0.23) | 7.76E-01 | 2.13E-01 | 2.66E-01 | 9.95E-01 | 6.42E-01 | 6.19E-01 |
| 4929   | -0.09(0.15) | -0.04(0.13) | 0.48(0.44)  | 0.04(0.19)  | 0.57(0.47)  | 0.52(0.45)  | 8.22E-01 | 2.30E-01 | 2.52E-01 | 9.95E-01 | 6.76E-01 | 6.11E-01 |

|        |             |             |             |             |             |             |          |          |          |          |          |          |
|--------|-------------|-------------|-------------|-------------|-------------|-------------|----------|----------|----------|----------|----------|----------|
| 16550  | -0.08(0.15) | -0.24(0.21) | -0.33(0.13) | -0.15(0.26) | -0.24(0.20) | -0.09(0.24) | 5.53E-01 | 2.35E-01 | 7.21E-01 | 9.95E-01 | 6.84E-01 | 9.11E-01 |
| 131620 | -0.09(0.20) | 0.26(0.20)  | -0.36(0.11) | 0.35(0.28)  | -0.27(0.23) | -0.62(0.22) | 2.14E-01 | 2.36E-01 | 7.40E-03 | 9.95E-01 | 6.84E-01 | 1.29E-01 |
| 453    | -0.38(0.63) | -0.01(0.09) | 0.60(0.54)  | 0.37(0.63)  | 0.98(0.83)  | 0.61(0.54)  | 5.56E-01 | 2.40E-01 | 2.68E-01 | 9.95E-01 | 6.87E-01 | 6.19E-01 |
| 14509  | -0.08(0.16) | 0.08(0.23)  | -0.33(0.14) | 0.16(0.28)  | -0.25(0.21) | -0.41(0.27) | 5.66E-01 | 2.41E-01 | 1.39E-01 | 9.95E-01 | 6.87E-01 | 4.95E-01 |
| 4985   | 0.01(0.10)  | -0.86(1.47) | -4.61(3.96) | -0.87(1.47) | -4.62(3.96) | -3.75(4.21) | 5.56E-01 | 2.47E-01 | 3.76E-01 | 9.95E-01 | 6.99E-01 | 7.12E-01 |
| 5085   | -0.02(0.10) | 0.17(0.48)  | -0.58(0.48) | 0.19(0.49)  | -0.56(0.48) | -0.76(0.68) | 6.96E-01 | 2.49E-01 | 2.69E-01 | 9.95E-01 | 6.99E-01 | 6.19E-01 |
| 7053   | 0.17(0.21)  | 0.00(0.25)  | -0.11(0.13) | -0.17(0.32) | -0.28(0.25) | -0.11(0.28) | 5.92E-01 | 2.53E-01 | 6.92E-01 | 9.95E-01 | 7.02E-01 | 9.06E-01 |
| 16792  | 0.09(0.19)  | 0.11(0.15)  | -0.19(0.15) | 0.03(0.25)  | -0.28(0.25) | -0.30(0.22) | 9.19E-01 | 2.63E-01 | 1.69E-01 | 9.95E-01 | 7.13E-01 | 5.34E-01 |
| 134    | 0.28(0.35)  | 0.11(0.10)  | 0.70(0.14)  | -0.17(0.36) | 0.42(0.38)  | 0.59(0.18)  | 6.43E-01 | 2.68E-01 | 1.38E-03 | 9.95E-01 | 7.19E-01 | 6.59E-02 |
| 1709   | 0.10(0.24)  | 0.36(0.18)  | -0.18(0.11) | 0.25(0.30)  | -0.29(0.26) | -0.54(0.22) | 4.00E-01 | 2.69E-01 | 1.52E-02 | 9.95E-01 | 7.19E-01 | 2.03E-01 |
| 135889 | -2.22(2.54) | 0.07(0.16)  | 0.59(0.20)  | 2.28(2.55)  | 2.81(2.57)  | 0.53(0.26)  | 3.74E-01 | 2.78E-01 | 4.28E-02 | 9.95E-01 | 7.22E-01 | 2.78E-01 |
| 490    | -0.01(0.15) | 0.11(0.45)  | -0.21(0.12) | 0.12(0.47)  | -0.20(0.19) | -0.32(0.47) | 8.07E-01 | 2.79E-01 | 4.95E-01 | 9.95E-01 | 7.22E-01 | 7.82E-01 |
| 106634 | 0.01(0.13)  | -0.03(0.21) | -0.21(0.16) | -0.04(0.25) | -0.23(0.21) | -0.19(0.27) | 8.67E-01 | 2.81E-01 | 4.86E-01 | 9.95E-01 | 7.22E-01 | 7.73E-01 |
| 41708  | -0.03(0.18) | 0.06(0.17)  | 0.20(0.13)  | 0.09(0.24)  | 0.23(0.22)  | 0.14(0.22)  | 7.03E-01 | 2.97E-01 | 5.18E-01 | 9.95E-01 | 7.22E-01 | 7.99E-01 |
| 160    | 0.04(0.12)  | 0.31(0.33)  | -0.37(0.38) | 0.27(0.34)  | -0.41(0.39) | -0.68(0.49) | 4.36E-01 | 2.98E-01 | 1.74E-01 | 9.95E-01 | 7.22E-01 | 5.42E-01 |
| 32247  | 0.00(0.17)  | -0.15(0.21) | -0.22(0.13) | -0.16(0.28) | -0.22(0.21) | -0.07(0.25) | 5.75E-01 | 2.98E-01 | 7.93E-01 | 9.95E-01 | 7.22E-01 | 9.35E-01 |
| 4933   | 0.16(0.20)  | 0.07(0.12)  | -0.14(0.20) | -0.10(0.24) | -0.30(0.29) | -0.20(0.23) | 6.81E-01 | 2.98E-01 | 3.88E-01 | 9.95E-01 | 7.22E-01 | 7.27E-01 |
| 21666  | -0.01(0.10) | 0.29(0.24)  | 0.31(0.28)  | 0.30(0.26)  | 0.31(0.30)  | 0.01(0.37)  | 2.57E-01 | 3.00E-01 | 9.75E-01 | 9.95E-01 | 7.22E-01 | 9.97E-01 |
| 21513  | 0.05(0.10)  | 0.29(0.26)  | 0.38(0.29)  | 0.23(0.27)  | 0.32(0.31)  | 0.09(0.39)  | 3.90E-01 | 3.01E-01 | 8.22E-01 | 9.95E-01 | 7.22E-01 | 9.41E-01 |
| 2039   | 0.16(0.21)  | 0.23(0.37)  | -0.09(0.11) | 0.07(0.44)  | -0.25(0.24) | -0.32(0.38) | 8.74E-01 | 3.04E-01 | 4.06E-01 | 9.95E-01 | 7.22E-01 | 7.35E-01 |
| 6066   | 0.05(0.24)  | 0.13(0.16)  | -0.23(0.12) | 0.08(0.29)  | -0.28(0.27) | -0.36(0.20) | 7.77E-01 | 3.07E-01 | 7.74E-02 | 9.95E-01 | 7.23E-01 | 3.73E-01 |
| 9320   | 0.03(0.10)  | -0.25(0.28) | 0.29(0.24)  | -0.28(0.30) | 0.27(0.26)  | 0.54(0.38)  | 3.61E-01 | 3.16E-01 | 1.52E-01 | 9.95E-01 | 7.28E-01 | 5.15E-01 |
| 26918  | 0.04(0.17)  | 0.01(0.14)  | 0.28(0.16)  | -0.03(0.22) | 0.24(0.24)  | 0.27(0.21)  | 8.77E-01 | 3.16E-01 | 1.94E-01 | 9.95E-01 | 7.28E-01 | 5.49E-01 |
| 6802   | 0.00(0.21)  | -0.10(0.23) | 0.25(0.11)  | -0.10(0.31) | 0.24(0.24)  | 0.34(0.26)  | 7.49E-01 | 3.18E-01 | 2.02E-01 | 9.95E-01 | 7.28E-01 | 5.52E-01 |
| 93947  | 0.00(0.23)  | 0.06(0.12)  | -0.27(0.16) | 0.06(0.25)  | -0.28(0.27) | -0.33(0.20) | 8.27E-01 | 3.20E-01 | 1.01E-01 | 9.95E-01 | 7.28E-01 | 4.32E-01 |
| 130396 | 0.26(0.88)  | 0.06(0.09)  | -0.93(0.77) | -0.20(0.89) | -1.19(1.19) | -0.98(0.78) | 8.20E-01 | 3.21E-01 | 2.11E-01 | 9.95E-01 | 7.28E-01 | 5.71E-01 |
| 2900   | -0.18(0.20) | 0.38(0.33)  | 0.11(0.21)  | 0.57(0.40)  | 0.29(0.30)  | -0.27(0.39) | 1.65E-01 | 3.30E-01 | 4.85E-01 | 9.95E-01 | 7.40E-01 | 7.73E-01 |
| 6864   | 0.05(0.22)  | 0.21(0.18)  | -0.21(0.15) | 0.16(0.28)  | -0.26(0.26) | -0.42(0.23) | 5.77E-01 | 3.32E-01 | 7.81E-02 | 9.95E-01 | 7.41E-01 | 3.73E-01 |
| 112487 | -0.03(0.29) | -0.18(0.25) | -0.32(0.10) | -0.15(0.39) | -0.29(0.30) | -0.14(0.26) | 7.01E-01 | 3.40E-01 | 5.92E-01 | 9.95E-01 | 7.49E-01 | 8.42E-01 |
| 1981   | 0.12(0.14)  | 0.01(0.29)  | -0.07(0.14) | -0.11(0.32) | -0.19(0.19) | -0.07(0.32) | 7.26E-01 | 3.43E-01 | 8.21E-01 | 9.95E-01 | 7.49E-01 | 9.41E-01 |

|        |             |             |             |             |             |             |          |          |          |          |          |          |
|--------|-------------|-------------|-------------|-------------|-------------|-------------|----------|----------|----------|----------|----------|----------|
| 17068  | -0.25(0.22) | 0.13(0.22)  | -0.47(0.08) | 0.38(0.31)  | -0.22(0.23) | -0.60(0.24) | 2.33E-01 | 3.46E-01 | 1.46E-02 | 9.95E-01 | 7.49E-01 | 2.03E-01 |
| 120526 | -0.05(0.25) | 0.24(0.22)  | -0.30(0.11) | 0.28(0.33)  | -0.26(0.27) | -0.54(0.25) | 3.99E-01 | 3.48E-01 | 3.25E-02 | 9.95E-01 | 7.49E-01 | 2.57E-01 |
| 122151 | -0.02(0.26) | 0.05(0.19)  | -0.27(0.12) | 0.07(0.32)  | -0.25(0.28) | -0.32(0.22) | 8.32E-01 | 3.71E-01 | 1.42E-01 | 9.95E-01 | 7.82E-01 | 4.96E-01 |
| 6115   | 0.09(0.42)  | 0.05(0.11)  | 0.51(0.19)  | -0.04(0.44) | 0.42(0.47)  | 0.46(0.22)  | 9.26E-01 | 3.73E-01 | 3.83E-02 | 9.95E-01 | 7.82E-01 | 2.65E-01 |
| 160543 | 0.15(0.20)  | 0.06(0.12)  | -0.12(0.23) | -0.09(0.23) | -0.27(0.30) | -0.18(0.26) | 7.03E-01 | 3.81E-01 | 4.98E-01 | 9.95E-01 | 7.89E-01 | 7.82E-01 |
| 6538   | 0.26(0.22)  | 0.13(0.14)  | 0.02(0.18)  | -0.13(0.26) | -0.24(0.29) | -0.12(0.22) | 6.36E-01 | 3.97E-01 | 5.98E-01 | 9.95E-01 | 8.02E-01 | 8.42E-01 |
| 20903  | -0.10(0.16) | 0.10(0.16)  | -0.30(0.19) | 0.20(0.22)  | -0.20(0.24) | -0.41(0.24) | 3.69E-01 | 4.03E-01 | 9.83E-02 | 9.95E-01 | 8.02E-01 | 4.31E-01 |
| 109423 | 0.03(0.19)  | -0.30(0.10) | 0.30(0.26)  | -0.33(0.21) | 0.26(0.32)  | 0.59(0.28)  | 1.22E-01 | 4.13E-01 | 3.75E-02 | 9.95E-01 | 8.02E-01 | 2.65E-01 |
| 117171 | -0.08(0.17) | 0.20(0.19)  | -0.25(0.13) | 0.28(0.25)  | -0.17(0.21) | -0.45(0.23) | 2.72E-01 | 4.14E-01 | 5.71E-02 | 9.95E-01 | 8.02E-01 | 3.21E-01 |
| 1064   | 0.01(0.18)  | 0.18(0.36)  | 0.18(0.11)  | 0.17(0.40)  | 0.17(0.21)  | 0.00(0.38)  | 6.81E-01 | 4.19E-01 | 9.96E-01 | 9.95E-01 | 8.02E-01 | 9.99E-01 |
| 107960 | 0.10(0.30)  | 0.14(0.21)  | -0.17(0.11) | 0.04(0.36)  | -0.26(0.32) | -0.31(0.25) | 9.07E-01 | 4.19E-01 | 2.19E-01 | 9.95E-01 | 8.02E-01 | 5.73E-01 |
| 126397 | -0.11(0.16) | -0.05(0.22) | -0.28(0.13) | 0.06(0.26)  | -0.17(0.21) | -0.23(0.25) | 8.27E-01 | 4.27E-01 | 3.72E-01 | 9.95E-01 | 8.02E-01 | 7.07E-01 |
| 4871   | -0.09(0.22) | 0.04(0.21)  | 0.11(0.11)  | 0.13(0.30)  | 0.20(0.25)  | 0.07(0.24)  | 6.81E-01 | 4.28E-01 | 7.61E-01 | 9.95E-01 | 8.02E-01 | 9.24E-01 |
| 160542 | 0.12(0.12)  | 0.13(0.25)  | -0.05(0.19) | 0.01(0.28)  | -0.17(0.21) | -0.18(0.31) | 9.63E-01 | 4.42E-01 | 5.61E-01 | 9.95E-01 | 8.14E-01 | 8.41E-01 |
| 4983   | -0.08(0.27) | 0.20(0.18)  | 0.14(0.12)  | 0.29(0.33)  | 0.23(0.30)  | -0.06(0.21) | 3.96E-01 | 4.51E-01 | 7.82E-01 | 9.95E-01 | 8.20E-01 | 9.34E-01 |
| 4976   | -0.02(0.11) | 0.13(0.21)  | -0.22(0.25) | 0.15(0.24)  | -0.20(0.27) | -0.35(0.32) | 5.37E-01 | 4.54E-01 | 2.78E-01 | 9.95E-01 | 8.20E-01 | 6.19E-01 |
| 121002 | -0.11(0.21) | 0.11(0.19)  | 0.07(0.13)  | 0.21(0.28)  | 0.18(0.24)  | -0.03(0.23) | 4.56E-01 | 4.60E-01 | 8.96E-01 | 9.95E-01 | 8.20E-01 | 9.77E-01 |
| 479    | -0.01(0.26) | 0.00(0.12)  | -0.24(0.16) | 0.01(0.29)  | -0.22(0.30) | -0.24(0.20) | 9.67E-01 | 4.62E-01 | 2.53E-01 | 9.95E-01 | 8.20E-01 | 6.11E-01 |
| 87769  | 0.05(0.11)  | -0.11(0.33) | -0.13(0.22) | -0.16(0.35) | -0.18(0.24) | -0.02(0.41) | 6.55E-01 | 4.65E-01 | 9.57E-01 | 9.95E-01 | 8.20E-01 | 9.97E-01 |
| 145494 | 0.00(0.14)  | -0.11(0.14) | -0.20(0.23) | -0.10(0.21) | -0.20(0.27) | -0.09(0.27) | 6.16E-01 | 4.70E-01 | 7.27E-01 | 9.95E-01 | 8.24E-01 | 9.11E-01 |
| 3329   | -0.06(0.19) | 0.02(0.16)  | -0.25(0.18) | 0.09(0.25)  | -0.19(0.26) | -0.27(0.24) | 7.33E-01 | 4.75E-01 | 2.60E-01 | 9.95E-01 | 8.29E-01 | 6.19E-01 |
| 18488  | 0.06(0.18)  | 0.09(0.16)  | -0.11(0.14) | 0.03(0.24)  | -0.17(0.23) | -0.20(0.21) | 8.99E-01 | 4.82E-01 | 3.59E-01 | 9.95E-01 | 8.33E-01 | 6.96E-01 |
| 5930   | -0.11(0.16) | -0.13(0.22) | -0.25(0.12) | -0.03(0.27) | -0.14(0.20) | -0.12(0.25) | 9.24E-01 | 4.85E-01 | 6.49E-01 | 9.95E-01 | 8.33E-01 | 8.80E-01 |
| 4981   | 0.03(0.12)  | 0.07(0.20)  | -0.20(0.30) | 0.04(0.23)  | -0.22(0.32) | -0.26(0.36) | 8.65E-01 | 4.86E-01 | 4.61E-01 | 9.95E-01 | 8.33E-01 | 7.54E-01 |
| 573    | -0.04(0.21) | -0.02(0.18) | 0.13(0.13)  | 0.03(0.28)  | 0.17(0.25)  | 0.15(0.23)  | 9.25E-01 | 4.94E-01 | 5.27E-01 | 9.95E-01 | 8.39E-01 | 7.99E-01 |
| 5288   | -0.26(0.42) | 0.09(0.35)  | 0.03(0.10)  | 0.34(0.56)  | 0.29(0.43)  | -0.05(0.37) | 5.46E-01 | 4.98E-01 | 8.90E-01 | 9.95E-01 | 8.39E-01 | 9.76E-01 |
| 4922   | -0.14(0.20) | -0.12(0.19) | -0.44(0.39) | 0.02(0.27)  | -0.30(0.44) | -0.32(0.44) | 9.39E-01 | 5.00E-01 | 4.63E-01 | 9.95E-01 | 8.39E-01 | 7.54E-01 |
| 133943 | 0.14(0.18)  | 0.09(0.12)  | -0.05(0.24) | -0.05(0.21) | -0.20(0.29) | -0.15(0.28) | 8.15E-01 | 5.01E-01 | 5.92E-01 | 9.95E-01 | 8.39E-01 | 8.42E-01 |
| 469    | 0.15(0.19)  | 0.17(0.20)  | 0.00(0.12)  | 0.03(0.28)  | -0.15(0.22) | -0.17(0.23) | 9.24E-01 | 5.15E-01 | 4.63E-01 | 9.95E-01 | 8.56E-01 | 7.54E-01 |
| 91421  | -0.11(0.26) | 0.01(0.15)  | 0.08(0.13)  | 0.11(0.30)  | 0.19(0.30)  | 0.08(0.21)  | 7.03E-01 | 5.22E-01 | 7.05E-01 | 9.95E-01 | 8.62E-01 | 9.11E-01 |

|        |             |             |             |             |             |             |          |          |          |          |          |          |
|--------|-------------|-------------|-------------|-------------|-------------|-------------|----------|----------|----------|----------|----------|----------|
| 87756  | -0.11(0.16) | -0.08(0.21) | -0.24(0.13) | 0.03(0.26)  | -0.13(0.21) | -0.16(0.25) | 9.09E-01 | 5.41E-01 | 5.28E-01 | 9.95E-01 | 8.69E-01 | 7.99E-01 |
| 4546   | 0.02(0.14)  | 0.02(0.24)  | 0.23(0.33)  | -0.00(0.28) | 0.22(0.35)  | 0.21(0.40)  | 9.91E-01 | 5.43E-01 | 5.97E-01 | 9.96E-01 | 8.69E-01 | 8.42E-01 |
| 892    | 0.08(0.58)  | -0.04(0.10) | 0.49(0.36)  | -0.12(0.58) | 0.41(0.67)  | 0.53(0.37)  | 8.33E-01 | 5.43E-01 | 1.58E-01 | 9.95E-01 | 8.69E-01 | 5.22E-01 |
| 109387 | 0.07(0.26)  | -0.01(0.28) | 0.24(0.10)  | -0.08(0.38) | 0.16(0.28)  | 0.24(0.30)  | 8.40E-01 | 5.53E-01 | 4.19E-01 | 9.95E-01 | 8.69E-01 | 7.41E-01 |
| 119066 | 0.02(0.20)  | 0.02(0.15)  | 0.19(0.20)  | 0.01(0.25)  | 0.17(0.29)  | 0.16(0.25)  | 9.79E-01 | 5.63E-01 | 5.24E-01 | 9.95E-01 | 8.69E-01 | 7.99E-01 |
| 31559  | -0.01(0.33) | 0.01(0.13)  | -0.21(0.13) | 0.01(0.35)  | -0.21(0.36) | -0.22(0.19) | 9.70E-01 | 5.63E-01 | 2.40E-01 | 9.95E-01 | 8.69E-01 | 6.00E-01 |
| 4928   | -0.06(0.20) | -0.09(0.21) | -0.77(1.21) | -0.03(0.29) | -0.70(1.23) | -0.68(1.23) | 9.31E-01 | 5.68E-01 | 5.84E-01 | 9.95E-01 | 8.69E-01 | 8.41E-01 |
| 26916  | 0.11(0.21)  | -0.18(0.14) | -0.04(0.16) | -0.29(0.26) | -0.15(0.26) | 0.14(0.21)  | 2.65E-01 | 5.68E-01 | 5.10E-01 | 9.95E-01 | 8.69E-01 | 7.94E-01 |
| 8607   | -0.04(0.15) | 0.08(0.15)  | -0.17(0.18) | 0.12(0.22)  | -0.13(0.23) | -0.24(0.24) | 5.84E-01 | 5.79E-01 | 3.06E-01 | 9.95E-01 | 8.69E-01 | 6.55E-01 |
| 62433  | -0.08(0.14) | -0.15(0.18) | -0.20(0.16) | -0.08(0.23) | -0.12(0.21) | -0.04(0.24) | 7.43E-01 | 5.79E-01 | 8.52E-01 | 9.95E-01 | 8.69E-01 | 9.54E-01 |
| 135619 | 0.04(0.11)  | -0.17(0.24) | 0.22(0.30)  | -0.20(0.26) | 0.18(0.32)  | 0.38(0.38)  | 4.37E-01 | 5.80E-01 | 3.24E-01 | 9.95E-01 | 8.69E-01 | 6.63E-01 |
| 4898   | -0.10(0.19) | 0.10(0.17)  | -0.23(0.13) | 0.20(0.26)  | -0.13(0.23) | -0.33(0.21) | 4.44E-01 | 5.84E-01 | 1.30E-01 | 9.95E-01 | 8.69E-01 | 4.93E-01 |
| 4577   | 0.19(0.49)  | -0.29(0.30) | -0.09(0.10) | -0.48(0.58) | -0.27(0.50) | 0.20(0.32)  | 4.14E-01 | 5.89E-01 | 5.23E-01 | 9.95E-01 | 8.69E-01 | 7.99E-01 |
| 41682  | 0.04(0.13)  | 0.05(0.16)  | 0.19(0.25)  | 0.01(0.20)  | 0.15(0.28)  | 0.14(0.30)  | 9.59E-01 | 5.91E-01 | 6.36E-01 | 9.95E-01 | 8.69E-01 | 8.69E-01 |
| 1725   | 0.05(0.12)  | 0.18(0.18)  | 0.19(0.24)  | 0.13(0.21)  | 0.14(0.26)  | 0.01(0.29)  | 5.32E-01 | 5.93E-01 | 9.83E-01 | 9.95E-01 | 8.69E-01 | 9.97E-01 |
| 68     | -0.11(0.16) | 0.01(0.20)  | -0.21(0.13) | 0.12(0.26)  | -0.10(0.20) | -0.23(0.24) | 6.38E-01 | 6.09E-01 | 3.40E-01 | 9.95E-01 | 8.77E-01 | 6.79E-01 |
| 39     | -0.12(0.20) | 0.01(0.27)  | -0.23(0.12) | 0.14(0.34)  | -0.11(0.23) | -0.25(0.30) | 6.88E-01 | 6.29E-01 | 4.10E-01 | 9.95E-01 | 8.87E-01 | 7.35E-01 |
| 7402   | 0.13(0.16)  | 0.02(0.18)  | -0.22(0.70) | -0.10(0.23) | -0.34(0.70) | -0.24(0.72) | 6.64E-01 | 6.30E-01 | 7.40E-01 | 9.95E-01 | 8.87E-01 | 9.11E-01 |
| 4941   | 0.00(0.22)  | 0.18(0.17)  | -0.13(0.17) | 0.18(0.28)  | -0.13(0.28) | -0.31(0.24) | 5.20E-01 | 6.30E-01 | 1.91E-01 | 9.95E-01 | 8.87E-01 | 5.49E-01 |
| 6579   | -0.11(0.18) | 0.08(0.18)  | 0.00(0.14)  | 0.18(0.25)  | 0.11(0.23)  | -0.07(0.22) | 4.70E-01 | 6.31E-01 | 7.42E-01 | 9.95E-01 | 8.87E-01 | 9.11E-01 |
| 4943   | 0.03(0.17)  | 0.10(0.19)  | -0.07(0.13) | 0.07(0.25)  | -0.10(0.22) | -0.17(0.22) | 7.96E-01 | 6.33E-01 | 4.51E-01 | 9.95E-01 | 8.87E-01 | 7.54E-01 |
| 4543   | 0.00(0.12)  | 0.06(0.16)  | 0.18(0.36)  | 0.06(0.20)  | 0.18(0.38)  | 0.13(0.39)  | 7.78E-01 | 6.36E-01 | 7.50E-01 | 9.95E-01 | 8.87E-01 | 9.16E-01 |
| 41697  | -0.04(0.15) | 0.13(0.16)  | 0.06(0.17)  | 0.17(0.22)  | 0.11(0.23)  | -0.06(0.23) | 4.44E-01 | 6.37E-01 | 7.90E-01 | 9.95E-01 | 8.87E-01 | 9.35E-01 |
| 1878   | -0.11(0.17) | -0.05(0.14) | -0.22(0.16) | 0.06(0.22)  | -0.11(0.24) | -0.17(0.22) | 7.80E-01 | 6.52E-01 | 4.44E-01 | 9.95E-01 | 9.01E-01 | 7.54E-01 |
| 160313 | 0.02(0.16)  | -0.30(0.48) | 0.11(0.13)  | -0.32(0.50) | 0.09(0.20)  | 0.41(0.49)  | 5.23E-01 | 6.64E-01 | 4.08E-01 | 9.95E-01 | 9.04E-01 | 7.35E-01 |
| 47170  | 0.03(0.37)  | 0.01(0.11)  | 0.21(0.17)  | -0.02(0.39) | 0.17(0.41)  | 0.20(0.20)  | 9.50E-01 | 6.73E-01 | 3.25E-01 | 9.95E-01 | 9.04E-01 | 6.63E-01 |
| 159824 | -0.11(0.15) | 0.11(0.14)  | 0.00(0.21)  | 0.22(0.20)  | 0.11(0.26)  | -0.12(0.26) | 2.59E-01 | 6.77E-01 | 6.58E-01 | 9.95E-01 | 9.04E-01 | 8.85E-01 |
| 54     | -0.08(0.17) | -0.07(0.15) | -0.18(0.16) | 0.01(0.22)  | -0.10(0.23) | -0.10(0.21) | 9.72E-01 | 6.77E-01 | 6.30E-01 | 9.95E-01 | 9.04E-01 | 8.69E-01 |
| 87710  | 0.31(0.63)  | 0.03(0.12)  | 0.04(0.18)  | -0.28(0.64) | -0.27(0.65) | 0.01(0.21)  | 6.66E-01 | 6.78E-01 | 9.73E-01 | 9.95E-01 | 9.04E-01 | 9.97E-01 |
| 132414 | 0.25(0.58)  | 0.04(0.10)  | -0.10(0.64) | -0.22(0.58) | -0.36(0.86) | -0.14(0.65) | 7.13E-01 | 6.79E-01 | 8.25E-01 | 9.95E-01 | 9.04E-01 | 9.43E-01 |

|        |             |             |             |             |             |             |          |          |          |          |          |          |
|--------|-------------|-------------|-------------|-------------|-------------|-------------|----------|----------|----------|----------|----------|----------|
| 16561  | -0.05(0.21) | -0.14(0.20) | 0.05(0.13)  | -0.09(0.29) | 0.10(0.24)  | 0.19(0.23)  | 7.57E-01 | 6.87E-01 | 4.21E-01 | 9.95E-01 | 9.04E-01 | 7.41E-01 |
| 6353   | 0.02(0.11)  | 0.21(0.29)  | -0.09(0.26) | 0.19(0.31)  | -0.11(0.28) | -0.30(0.39) | 5.43E-01 | 6.98E-01 | 4.39E-01 | 9.95E-01 | 9.04E-01 | 7.54E-01 |
| 5990   | 0.07(0.17)  | -0.02(0.19) | -0.02(0.14) | -0.09(0.26) | -0.09(0.22) | 0.00(0.23)  | 7.40E-01 | 6.99E-01 | 9.99E-01 | 9.95E-01 | 9.04E-01 | 9.99E-01 |
| 4600   | -0.14(0.18) | 0.06(0.15)  | -0.24(0.21) | 0.19(0.24)  | -0.10(0.25) | -0.29(0.26) | 4.20E-01 | 7.02E-01 | 2.75E-01 | 9.95E-01 | 9.04E-01 | 6.19E-01 |
| 2936   | 0.00(0.42)  | 0.19(0.33)  | 0.17(0.10)  | 0.19(0.54)  | 0.17(0.44)  | -0.02(0.34) | 7.29E-01 | 7.03E-01 | 9.52E-01 | 9.95E-01 | 9.04E-01 | 9.97E-01 |
| 132976 | 0.05(0.18)  | 0.18(0.23)  | -0.03(0.12) | 0.13(0.29)  | -0.08(0.21) | -0.21(0.26) | 6.55E-01 | 7.05E-01 | 4.12E-01 | 9.95E-01 | 9.04E-01 | 7.35E-01 |
| 4925   | -0.06(0.18) | 0.01(0.16)  | -0.15(0.16) | 0.06(0.24)  | -0.09(0.24) | -0.15(0.23) | 7.89E-01 | 7.09E-01 | 4.98E-01 | 9.95E-01 | 9.04E-01 | 7.82E-01 |
| 87720  | -0.15(0.15) | -0.13(0.15) | -0.23(0.17) | 0.01(0.21)  | -0.08(0.23) | -0.10(0.22) | 9.51E-01 | 7.14E-01 | 6.60E-01 | 9.95E-01 | 9.05E-01 | 8.85E-01 |
| 4932   | -0.12(0.95) | 0.01(0.11)  | 0.24(0.17)  | 0.12(0.97)  | 0.35(0.97)  | 0.23(0.20)  | 8.98E-01 | 7.20E-01 | 2.71E-01 | 9.95E-01 | 9.06E-01 | 6.19E-01 |
| 119129 | 0.04(0.12)  | 0.17(0.16)  | 0.15(0.32)  | 0.13(0.20)  | 0.12(0.35)  | -0.02(0.36) | 5.11E-01 | 7.40E-01 | 9.64E-01 | 9.95E-01 | 9.20E-01 | 9.97E-01 |
| 1996   | -0.05(0.22) | 0.05(0.45)  | -0.12(0.11) | 0.09(0.49)  | -0.08(0.24) | -0.17(0.46) | 8.49E-01 | 7.52E-01 | 7.09E-01 | 9.95E-01 | 9.26E-01 | 9.11E-01 |
| 64551  | 0.06(0.16)  | -0.06(0.19) | 0.12(0.13)  | -0.12(0.24) | 0.06(0.20)  | 0.18(0.23)  | 6.14E-01 | 7.73E-01 | 4.34E-01 | 9.95E-01 | 9.41E-01 | 7.51E-01 |
| 4938   | -0.39(1.49) | 0.10(0.75)  | 0.03(0.09)  | 0.48(1.70)  | 0.41(1.50)  | -0.07(0.76) | 7.79E-01 | 7.83E-01 | 9.30E-01 | 9.95E-01 | 9.46E-01 | 9.97E-01 |
| 160464 | 0.09(0.17)  | 0.08(0.15)  | 0.15(0.17)  | -0.01(0.23) | 0.06(0.25)  | 0.07(0.23)  | 9.65E-01 | 8.11E-01 | 7.65E-01 | 9.95E-01 | 9.62E-01 | 9.25E-01 |
| 139436 | 0.12(0.14)  | 0.03(0.16)  | 0.18(0.22)  | -0.10(0.21) | 0.06(0.25)  | 0.15(0.27)  | 6.51E-01 | 8.22E-01 | 5.70E-01 | 9.95E-01 | 9.65E-01 | 8.41E-01 |
| 34075  | 0.08(0.42)  | 0.17(0.13)  | -0.02(0.22) | 0.09(0.44)  | -0.10(0.47) | -0.19(0.25) | 8.41E-01 | 8.24E-01 | 4.51E-01 | 9.95E-01 | 9.65E-01 | 7.54E-01 |
| 1675   | 0.00(0.32)  | 0.14(0.42)  | 0.07(0.10)  | 0.14(0.54)  | 0.07(0.34)  | -0.07(0.44) | 7.93E-01 | 8.27E-01 | 8.76E-01 | 9.95E-01 | 9.65E-01 | 9.62E-01 |
| 119167 | 0.07(0.17)  | 0.07(0.18)  | 0.03(0.14)  | -0.00(0.25) | -0.04(0.22) | -0.05(0.23) | 9.89E-01 | 8.46E-01 | 8.41E-01 | 9.96E-01 | 9.72E-01 | 9.52E-01 |
| 2011   | -0.04(0.12) | -0.43(0.29) | 0.00(0.18)  | -0.39(0.31) | 0.04(0.22)  | 0.43(0.34)  | 2.19E-01 | 8.49E-01 | 2.13E-01 | 9.95E-01 | 9.72E-01 | 5.73E-01 |
| 160463 | 0.07(0.17)  | 0.16(0.18)  | 0.11(0.13)  | 0.09(0.24)  | 0.04(0.22)  | -0.05(0.22) | 7.06E-01 | 8.56E-01 | 8.11E-01 | 9.95E-01 | 9.72E-01 | 9.41E-01 |
| 103102 | -0.01(0.28) | 0.21(0.36)  | -0.07(0.11) | 0.22(0.45)  | -0.05(0.30) | -0.27(0.36) | 6.28E-01 | 8.56E-01 | 4.55E-01 | 9.95E-01 | 9.72E-01 | 7.54E-01 |
| 139478 | 0.07(0.22)  | 0.04(0.12)  | 0.36(1.60)  | -0.03(0.24) | 0.29(1.62)  | 0.32(1.61)  | 8.90E-01 | 8.59E-01 | 8.40E-01 | 9.95E-01 | 9.72E-01 | 9.52E-01 |
| 145492 | -0.04(0.62) | -0.10(0.10) | 0.07(0.22)  | -0.06(0.63) | 0.11(0.66)  | 0.18(0.24)  | 9.20E-01 | 8.63E-01 | 4.65E-01 | 9.95E-01 | 9.74E-01 | 7.54E-01 |
| 4971   | -0.01(0.15) | 0.08(0.15)  | -0.05(0.19) | 0.09(0.22)  | -0.04(0.24) | -0.13(0.24) | 6.68E-01 | 8.69E-01 | 5.77E-01 | 9.95E-01 | 9.75E-01 | 8.41E-01 |
| 4927   | 0.06(0.11)  | 0.03(0.23)  | 0.11(0.28)  | -0.03(0.25) | 0.05(0.30)  | 0.08(0.37)  | 9.01E-01 | 8.71E-01 | 8.28E-01 | 9.95E-01 | 9.75E-01 | 9.43E-01 |
| 153    | 0.00(0.35)  | 0.37(0.27)  | 0.05(0.11)  | 0.37(0.45)  | 0.06(0.36)  | -0.32(0.29) | 4.14E-01 | 8.78E-01 | 2.79E-01 | 9.95E-01 | 9.76E-01 | 6.19E-01 |
| 4936   | -0.55(1.18) | 0.16(0.25)  | -0.37(0.29) | 0.71(1.20)  | 0.18(1.21)  | -0.52(0.38) | 5.58E-01 | 8.81E-01 | 1.76E-01 | 9.95E-01 | 9.77E-01 | 5.45E-01 |
| 110    | -0.03(0.27) | -0.15(0.31) | 0.01(0.11)  | -0.12(0.41) | 0.04(0.29)  | 0.16(0.33)  | 7.68E-01 | 8.88E-01 | 6.25E-01 | 9.95E-01 | 9.80E-01 | 8.69E-01 |
| 4887   | -0.07(0.17) | -0.06(0.12) | -0.13(0.43) | 0.01(0.21)  | -0.06(0.46) | -0.07(0.44) | 9.54E-01 | 8.97E-01 | 8.71E-01 | 9.95E-01 | 9.83E-01 | 9.62E-01 |
| 657    | 0.01(0.27)  | 0.05(0.12)  | -0.03(0.17) | 0.04(0.30)  | -0.04(0.32) | -0.08(0.21) | 8.96E-01 | 9.04E-01 | 7.07E-01 | 9.95E-01 | 9.83E-01 | 9.11E-01 |

|        |             |             |             |             |             |             |          |          |          |          |          |          |
|--------|-------------|-------------|-------------|-------------|-------------|-------------|----------|----------|----------|----------|----------|----------|
| 5482   | 0.02(0.19)  | 0.06(0.13)  | 0.05(0.20)  | 0.05(0.23)  | 0.03(0.26)  | -0.01(0.24) | 8.46E-01 | 9.07E-01 | 9.53E-01 | 9.95E-01 | 9.83E-01 | 9.97E-01 |
| 137    | 0.00(0.15)  | 0.09(0.22)  | 0.02(0.14)  | 0.10(0.27)  | 0.02(0.21)  | -0.07(0.26) | 7.21E-01 | 9.09E-01 | 7.86E-01 | 9.95E-01 | 9.83E-01 | 9.34E-01 |
| 106629 | -0.04(0.11) | 0.62(0.73)  | -0.07(0.23) | 0.66(0.74)  | -0.03(0.26) | -0.68(0.75) | 3.76E-01 | 9.18E-01 | 3.63E-01 | 9.95E-01 | 9.86E-01 | 6.99E-01 |
| 1912   | -0.09(0.21) | 0.02(0.11)  | -0.12(0.26) | 0.10(0.23)  | -0.03(0.33) | -0.14(0.28) | 6.65E-01 | 9.20E-01 | 6.34E-01 | 9.95E-01 | 9.86E-01 | 8.69E-01 |
| 3286   | -0.30(1.51) | 0.42(2.35)  | -0.15(0.10) | 0.72(2.78)  | 0.15(1.51)  | -0.57(2.35) | 7.97E-01 | 9.21E-01 | 8.10E-01 | 9.95E-01 | 9.86E-01 | 9.41E-01 |
| 17664  | -0.06(0.30) | 0.04(0.11)  | -0.03(0.26) | 0.10(0.32)  | 0.04(0.40)  | -0.07(0.28) | 7.48E-01 | 9.26E-01 | 8.18E-01 | 9.95E-01 | 9.86E-01 | 9.41E-01 |
| 88583  | 0.07(0.15)  | 0.18(0.19)  | 0.05(0.15)  | 0.11(0.24)  | -0.02(0.21) | -0.13(0.24) | 6.31E-01 | 9.30E-01 | 5.78E-01 | 9.95E-01 | 9.86E-01 | 8.41E-01 |
| 307    | -0.05(0.15) | 0.06(0.21)  | -0.07(0.15) | 0.11(0.26)  | -0.02(0.21) | -0.12(0.26) | 6.81E-01 | 9.34E-01 | 6.43E-01 | 9.95E-01 | 9.86E-01 | 8.75E-01 |
| 106936 | 0.04(0.15)  | 0.03(0.18)  | 0.03(0.17)  | -0.01(0.23) | -0.02(0.22) | 0.00(0.24)  | 9.53E-01 | 9.36E-01 | 9.86E-01 | 9.95E-01 | 9.86E-01 | 9.97E-01 |
| 139467 | -0.08(0.13) | 0.13(0.17)  | -0.05(0.52) | 0.22(0.21)  | 0.04(0.53)  | -0.18(0.54) | 3.07E-01 | 9.43E-01 | 7.45E-01 | 9.95E-01 | 9.90E-01 | 9.12E-01 |
| 443    | -0.12(0.21) | 0.10(0.13)  | -0.10(0.17) | 0.22(0.24)  | 0.02(0.26)  | -0.20(0.21) | 3.65E-01 | 9.50E-01 | 3.42E-01 | 9.95E-01 | 9.90E-01 | 6.79E-01 |
| 6526   | 0.00(0.12)  | 0.16(0.20)  | 0.02(0.21)  | 0.16(0.24)  | 0.01(0.24)  | -0.15(0.30) | 5.04E-01 | 9.52E-01 | 6.22E-01 | 9.95E-01 | 9.90E-01 | 8.69E-01 |
| 4975   | 0.04(0.18)  | -0.09(0.16) | 0.05(0.15)  | -0.13(0.24) | 0.01(0.24)  | 0.14(0.21)  | 6.04E-01 | 9.68E-01 | 5.24E-01 | 9.95E-01 | 9.90E-01 | 7.99E-01 |
| 41691  | -0.25(0.47) | -0.10(0.29) | -0.24(0.10) | 0.16(0.55)  | 0.02(0.48)  | -0.14(0.31) | 7.75E-01 | 9.70E-01 | 6.54E-01 | 9.95E-01 | 9.90E-01 | 8.84E-01 |
| 146957 | -0.15(0.20) | 0.08(0.19)  | -0.16(0.13) | 0.23(0.27)  | -0.01(0.23) | -0.23(0.23) | 4.08E-01 | 9.71E-01 | 3.04E-01 | 9.95E-01 | 9.90E-01 | 6.55E-01 |
| 4956   | -0.06(0.50) | -0.04(0.10) | -0.04(0.24) | 0.02(0.51)  | 0.02(0.55)  | -0.01(0.26) | 9.62E-01 | 9.75E-01 | 9.77E-01 | 9.95E-01 | 9.90E-01 | 9.97E-01 |
| 4533   | 0.33(0.42)  | 0.03(0.12)  | 0.34(0.16)  | -0.31(0.43) | 0.01(0.45)  | 0.32(0.20)  | 4.80E-01 | 9.79E-01 | 1.22E-01 | 9.95E-01 | 9.90E-01 | 4.84E-01 |
| 17253  | 0.08(0.20)  | -0.05(0.15) | 0.07(0.17)  | -0.13(0.25) | -0.01(0.27) | 0.13(0.23)  | 5.92E-01 | 9.79E-01 | 5.85E-01 | 9.95E-01 | 9.90E-01 | 8.41E-01 |
| 41699  | 0.04(0.24)  | 0.09(0.33)  | 0.04(0.11)  | 0.05(0.42)  | -0.01(0.27) | -0.06(0.35) | 9.05E-01 | 9.84E-01 | 8.73E-01 | 9.95E-01 | 9.92E-01 | 9.62E-01 |
| 4609   | 0.07(0.18)  | 0.18(0.41)  | 0.08(0.17)  | 0.11(0.45)  | 0.00(0.25)  | -0.11(0.45) | 8.06E-01 | 9.87E-01 | 8.11E-01 | 9.95E-01 | 9.92E-01 | 9.41E-01 |
| 4986   | 0.07(0.25)  | 0.03(0.14)  | 0.07(0.14)  | -0.04(0.29) | 0.00(0.29)  | 0.04(0.20)  | 8.81E-01 | 9.97E-01 | 8.20E-01 | 9.95E-01 | 9.97E-01 | 9.41E-01 |

Regression coefficient  $\beta^*$  (standard error (SE)) denotes the association between % change in metabolites and % change in HbA1c in each intervention group (IMI, BAND or RYGB).  $\beta^\dagger$  (SE) denotes the association between % change in metabolites and % change in HbA1c induced by different types of weight-loss interventions (BAND vs. IMI, RYGB vs. IMI, and RYGB vs. BAND), and was obtained from the interaction term (% change in metabolites  $\times$  types of intervention) in a linear regression model. In the model, the dependent variable was % change in HbA1c, and % change in each metabolite, intervention groups (RYGB, BAND, IMI), and their interactions (% change in each metabolite  $\times$  types of intervention) were the independent variables, adjusting for weight loss, sex, baseline age and BMI.



**Table S5. Metabolite modules identified by WGCNA among participants who received RYGB (n=25)**

| <b>Metabolite</b>          | <b>Module</b> |
|----------------------------|---------------|
| Valine                     | Blue          |
| Urea                       | Blue          |
| UDP GlcNac                 | Blue          |
| Tyrosine                   | Blue          |
| Trans-4-Hydroxyproline     | Blue          |
| Threonine                  | Blue          |
| Serine                     | Blue          |
| Pyrophosphate              | Blue          |
| Pseudo Uridine             | Blue          |
| Proline                    | Blue          |
| Phosphate                  | Blue          |
| Phenylalanine              | Blue          |
| Pelargonic Acid            | Blue          |
| Oxoproline                 | Blue          |
| Ornithine                  | Blue          |
| Myo-Inositol               | Blue          |
| Methionine                 | Blue          |
| Methanolphosphate          | Blue          |
| Lyxitol                    | Blue          |
| Leucine                    | Blue          |
| Isothreitol                | Blue          |
| Isoleucine                 | Blue          |
| Indole-3-Lactate           | Blue          |
| Glycine                    | Blue          |
| Glycerol-Alpha-Phosphate   | Blue          |
| Galactose                  | Blue          |
| Dodecanol                  | Blue          |
| Dehydroabietic Acid        | Blue          |
| Conduritol-Beta-Expoxide   | Blue          |
| Cholesterol                | Blue          |
| Caprylic Acid              | Blue          |
| Asparagine                 | Blue          |
| Aminomalonate              | Blue          |
| Alanine                    | Blue          |
| Acetaminophen              | Blue          |
| 4-Hydroxyphenylacetic Acid | Blue          |
| 2-Hydroxyvaleric Acid      | Blue          |
| 131620                     | Blue          |
| 103102                     | Blue          |
| 54                         | Blue          |
| 106629                     | Blue          |
| 257                        | Blue          |
| 3258                       | Blue          |
| 1148                       | Blue          |

---

|                                                      |       |
|------------------------------------------------------|-------|
| 17068                                                | Blue  |
| 4945                                                 | Blue  |
| 1941                                                 | Blue  |
| 121890                                               | Blue  |
| 4577                                                 | Blue  |
| 1981                                                 | Blue  |
| 1996                                                 | Blue  |
| 20903                                                | Blue  |
| 46292                                                | Blue  |
| 87756                                                | Blue  |
| 135260                                               | Blue  |
| 16550                                                | Blue  |
| 2061                                                 | Blue  |
| 14509                                                | Blue  |
| 146957                                               | Blue  |
| 132379                                               | Blue  |
| 47                                                   | Blue  |
| 62                                                   | Blue  |
| 1029                                                 | Blue  |
| 117171                                               | Blue  |
| 95550                                                | Blue  |
| 112487                                               | Blue  |
| 62433                                                | Blue  |
| 1709                                                 | Blue  |
| 443                                                  | Blue  |
| 6066                                                 | Blue  |
| 2936                                                 | Blue  |
| 7718                                                 | Blue  |
| 145492                                               | Blue  |
| 88583                                                | Blue  |
| Succinic Acid                                        | Brown |
| Pyrrole-2-Carboxylic Acid                            | Brown |
| Parabanic Acid Nist                                  | Brown |
| Oxamic Acid                                          | Brown |
| Oxalic Acid                                          | Brown |
| Indole-3-Acetate                                     | Brown |
| Ethanolamine                                         | Brown |
| Alloxanoic Acid Nist                                 | Brown |
| 2,3-Dihydroxybutanoic Acid Nist                      | Brown |
| 2-Piperidinobenzonitrile Nist                        | Brown |
| 2-Hydroxypyrazinyl-2-Propenoic Acid Ethyl Ester Nist | Brown |
| 2-Hydroxyglutaric Acid                               | Brown |
| 4938                                                 | Brown |
| 4925                                                 | Brown |
| 5483                                                 | Brown |
| 130396                                               | Brown |
| 4942                                                 | Brown |

---

---

|                     |       |
|---------------------|-------|
| 4943                | Brown |
| 4941                | Brown |
| 17537               | Brown |
| 3329                | Brown |
| 93947               | Brown |
| 6526                | Brown |
| 6580                | Brown |
| 41697               | Brown |
| 126397              | Brown |
| 6579                | Brown |
| 17263               | Brown |
| 13107               | Brown |
| 4971                | Brown |
| 4981                | Brown |
| 6864                | Brown |
| 4898                | Brown |
| 21513               | Brown |
| 6331                | Brown |
| 39                  | Brown |
| 4976                | Brown |
| 41699               | Brown |
| 5482                | Brown |
| 4937                | Brown |
| 16561               | Brown |
| 120526              | Brown |
| 479                 | Brown |
| 122151              | Brown |
| 87769               | Brown |
| 110                 | Brown |
| 1872                | Brown |
| 490                 | Brown |
| 120562              | Brown |
| 1878                | Brown |
| 132414              | Brown |
| Uridine             | Grey  |
| Uric Acid           | Grey  |
| Udp-Glucuronic Acid | Grey  |
| Tryptophan          | Grey  |
| Threonic Acid       | Grey  |
| Isothreonic Acid    | Grey  |
| Taurine             | Grey  |
| Sucrose             | Grey  |
| Shikimic Acid       | Grey  |
| Salicylic Acid      | Grey  |
| Quinic Acid         | Grey  |
| Pyruvic Acid        | Grey  |
| Pipecolinic Acid    | Grey  |

---

---

|                               |      |
|-------------------------------|------|
| Pinitol                       | Grey |
| Phosphoethanolamine           | Grey |
| Phenylethylamine              | Grey |
| Pentadecanoic Acid            | Grey |
| Palmitoleic Acid              | Grey |
| Palmitic Acid                 | Grey |
| Oleic Acid                    | Grey |
| Naproxen                      | Grey |
| N-Methylalanine               | Grey |
| Myristic Acid                 | Grey |
| Methionine Sulfoxide          | Grey |
| Mannitol                      | Grey |
| Malic Acid                    | Grey |
| Lysine                        | Grey |
| Linoleic Acid                 | Grey |
| Levoglucosan                  | Grey |
| Lactic Acid                   | Grey |
| Kynurenine                    | Grey |
| Isocitric Acid                | Grey |
| Hypoxanthine                  | Grey |
| Hydroxyproline Dipeptide Nist | Grey |
| Hydroxylamine                 | Grey |
| Histidine                     | Grey |
| Hippuric Acid                 | Grey |
| Hexitol                       | Grey |
| Heptadecanoic Acid            | Grey |
| Glycolic Acid                 | Grey |
| Glycerol                      | Grey |
| Glyceric Acid                 | Grey |
| Glutamine                     | Grey |
| Glutamic Acid                 | Grey |
| Fumaric Acid                  | Grey |
| Fucose                        | Grey |
| Erythritol                    | Grey |
| Deoxycholic Acid              | Grey |
| Cystine                       | Grey |
| Cysteine-Glycine              | Grey |
| Cysteine                      | Grey |
| Citric Acid                   | Grey |
| Arachidonic Acid              | Grey |
| Arabitol                      | Grey |
| Allantoic Acid                | Grey |
| 3-Hydroxybutyric Acid         | Grey |
| 3-(1-Pyrazolyl)-L-Alanine     | Grey |
| 2,4-Diaminobutyric Acid       | Grey |
| 2-Hydroxybutanoic Acid        | Grey |
| 2-Deoxyisotetronic Acid Nist  | Grey |

---

---

|                      |      |
|----------------------|------|
| 2-Deoxytetronic Acid | Grey |
| 1,5-Anhydroglucitol  | Grey |
| 1-Monostearin        | Grey |
| 1-Monopalmitin       | Grey |
| 5288                 | Grey |
| 4926                 | Grey |
| 4927                 | Grey |
| 109423               | Grey |
| 134                  | Grey |
| 4871                 | Grey |
| 31559                | Grey |
| 26918                | Grey |
| 26916                | Grey |
| 6115                 | Grey |
| 1675                 | Grey |
| 87710                | Grey |
| 4863                 | Grey |
| 4936                 | Grey |
| 1064                 | Grey |
| 98027                | Grey |
| 4533                 | Grey |
| 448                  | Grey |
| 4887                 | Grey |
| 892                  | Grey |
| 61                   | Grey |
| 42357                | Grey |
| 4929                 | Grey |
| 6802                 | Grey |
| 5930                 | Grey |
| 592                  | Grey |
| 32247                | Grey |
| 6353                 | Grey |
| 31357                | Grey |
| 18488                | Grey |
| 3029                 | Grey |
| 139467               | Grey |
| 137                  | Grey |
| 106634               | Grey |
| 41682                | Grey |
| 6538                 | Grey |
| 7053                 | Grey |
| 109387               | Grey |
| 119023               | Grey |
| 17664                | Grey |
| 145494               | Grey |
| 119066               | Grey |
| 4986                 | Grey |

---

---

|                      |           |
|----------------------|-----------|
| 106936               | Grey      |
| 573                  | Grey      |
| 41691                | Grey      |
| 4543                 | Grey      |
| 121002               | Grey      |
| 2039                 | Grey      |
| 657                  | Grey      |
| 473                  | Grey      |
| 41808                | Grey      |
| 5900                 | Grey      |
| 1875                 | Grey      |
| 1704                 | Grey      |
| 91                   | Grey      |
| 47170                | Grey      |
| 5990                 | Grey      |
| 17651                | Grey      |
| 91421                | Grey      |
| 160463               | Grey      |
| 159824               | Grey      |
| 117141               | Grey      |
| 9392                 | Grey      |
| 107960               | Grey      |
| 2900                 | Grey      |
| 87720                | Grey      |
| 34075                | Grey      |
| 469                  | Grey      |
| Xylose               | Turquoise |
| Xylitol              | Turquoise |
| Tagatose             | Turquoise |
| Stearic Acid         | Turquoise |
| Sorbitol             | Turquoise |
| Ribonic Acid         | Turquoise |
| Nonadecanoic Acid    | Turquoise |
| N-Acetylornithine    | Turquoise |
| N-Acetylmannosamine  | Turquoise |
| N-Acetylglycine Nist | Turquoise |
| Mannose              | Turquoise |
| Lactulose            | Turquoise |
| Ketohexose           | Turquoise |
| Hydrocinnamic Acid   | Turquoise |
| Hexuronic Acid       | Turquoise |
| Glucose              | Turquoise |
| Gluconic Acid        | Turquoise |
| Galactonic Acid      | Turquoise |
| Fructose             | Turquoise |
| Creatinine           | Turquoise |
| Butane-2,3-Diol NIST | Turquoise |

---

---

|                         |           |
|-------------------------|-----------|
| Benzoic Acid            | Turquoise |
| Behenic Acid            | Turquoise |
| Arachidic Acid          | Turquoise |
| Allantoin               | Turquoise |
| Aconitic Acid           | Turquoise |
| 3,6-Anhydro-D-Galactose | Turquoise |
| 3-Aminoisobutyric Acid  | Turquoise |
| 6646                    | Turquoise |
| 4928                    | Turquoise |
| 4922                    | Turquoise |
| 4985                    | Turquoise |
| 135889                  | Turquoise |
| 160464                  | Turquoise |
| 2001                    | Turquoise |
| 7402                    | Turquoise |
| 160542                  | Turquoise |
| 7403                    | Turquoise |
| 915                     | Turquoise |
| 160313                  | Turquoise |
| 8270                    | Turquoise |
| 16792                   | Turquoise |
| 4609                    | Turquoise |
| 7440                    | Turquoise |
| 111162                  | Turquoise |
| 2806                    | Turquoise |
| 133943                  | Turquoise |
| 5085                    | Turquoise |
| 132976                  | Turquoise |
| 4546                    | Turquoise |
| 139436                  | Turquoise |
| 16788                   | Turquoise |
| 119167                  | Turquoise |
| 160543                  | Turquoise |
| 160                     | Turquoise |
| 135619                  | Turquoise |
| 1725                    | Turquoise |
| 4600                    | Turquoise |
| 9320                    | Turquoise |
| 4956                    | Turquoise |
| 17253                   | Turquoise |
| 135610                  | Turquoise |
| 41683                   | Turquoise |
| 41689                   | Turquoise |
| 64551                   | Turquoise |
| 127277                  | Turquoise |
| 64546                   | Turquoise |
| 139478                  | Turquoise |

---

---

|                           |           |
|---------------------------|-----------|
| 1912                      | Turquoise |
| 21666                     | Turquoise |
| 100253                    | Turquoise |
| 3465                      | Turquoise |
| 135869                    | Turquoise |
| 119129                    | Turquoise |
| 4975                      | Turquoise |
| 8607                      | Turquoise |
| Tocopherol Gamma-         | Yellow    |
| Tocopherol Alpha-         | Yellow    |
| Nicotinic Acid            | Yellow    |
| N-Acetylglutamate         | Yellow    |
| Maltotriose               | Yellow    |
| Maltose                   | Yellow    |
| Lauric Acid               | Yellow    |
| Cellobiose Minor          | Yellow    |
| Capric Acid               | Yellow    |
| Beta-Alanine              | Yellow    |
| Aspartic Acid             | Yellow    |
| Adenosine-5-Monophosphate | Yellow    |
| 4933                      | Yellow    |
| 41708                     | Yellow    |
| 307                       | Yellow    |
| 4932                      | Yellow    |
| 68                        | Yellow    |
| 4983                      | Yellow    |
| 5419                      | Yellow    |
| 3286                      | Yellow    |
| 93385                     | Yellow    |
| 2011                      | Yellow    |
| 3232                      | Yellow    |
| 4948                      | Yellow    |
| 453                       | Yellow    |
| 153                       | Yellow    |
| 1700                      | Yellow    |
| 5346                      | Yellow    |
| 134336                    | Yellow    |
| 17453                     | Yellow    |

---



**Table S6. Metabolite modules identified by WGCNA among participants who received IMI (n=25)**

| <b>Metabolite</b>             | <b>Module</b> |
|-------------------------------|---------------|
| Xylose                        | Blue          |
| Tryptophan                    | Blue          |
| Threonine                     | Blue          |
| Threonic Acid                 | Blue          |
| Isothreonic Acid              | Blue          |
| Tagatose                      | Blue          |
| Serine                        | Blue          |
| Ribonic Acid                  | Blue          |
| Pyrophosphate                 | Blue          |
| Pseudo Uridine                | Blue          |
| Pinitol                       | Blue          |
| Oxoproline                    | Blue          |
| N-Acetylornithine             | Blue          |
| N-Acetylglutamate             | Blue          |
| Myo-Inositol                  | Blue          |
| Methionine                    | Blue          |
| Methanolphosphate             | Blue          |
| Mannose                       | Blue          |
| Lysine                        | Blue          |
| Lauric Acid                   | Blue          |
| Hydroxyproline Dipeptide NIST | Blue          |
| Hydrocinnamic Acid            | Blue          |
| Histidine                     | Blue          |
| Hexuronic Acid                | Blue          |
| Hexitol                       | Blue          |
| Glutamine                     | Blue          |
| Glucose                       | Blue          |
| Gluconic Acid                 | Blue          |
| Galactonic Acid               | Blue          |
| Fumaric Acid                  | Blue          |
| Fructose                      | Blue          |
| Cystine                       | Blue          |
| Cysteine-Glycine              | Blue          |
| Conduritol-Beta-Expoxide      | Blue          |
| Capric Acid                   | Blue          |
| Butane-2,3-Diol NIST          | Blue          |
| Benzoic Acid                  | Blue          |
| Allantoin                     | Blue          |
| Allantoic Acid                | Blue          |
| 3,6-Anhydro-D-Galactose       | Blue          |
| 2-Hydroxyvaleric Acid         | Blue          |
| 2-Hydroxyglutaric Acid        | Blue          |
| 1-Monopalmitin                | Blue          |
| 6646                          | Blue          |

---

|        |      |
|--------|------|
| 4928   | Blue |
| 4922   | Blue |
| 54     | Blue |
| 4926   | Blue |
| 4985   | Blue |
| 135889 | Blue |
| 4927   | Blue |
| 160464 | Blue |
| 6115   | Blue |
| 7402   | Blue |
| 307    | Blue |
| 4932   | Blue |
| 87710  | Blue |
| 7403   | Blue |
| 4936   | Blue |
| 915    | Blue |
| 160313 | Blue |
| 4983   | Blue |
| 4609   | Blue |
| 98027  | Blue |
| 106629 | Blue |
| 4533   | Blue |
| 7440   | Blue |
| 111162 | Blue |
| 2806   | Blue |
| 5419   | Blue |
| 5085   | Blue |
| 4887   | Blue |
| 61     | Blue |
| 4546   | Blue |
| 4929   | Blue |
| 139436 | Blue |
| 592    | Blue |
| 2011   | Blue |
| 139467 | Blue |
| 4600   | Blue |
| 4945   | Blue |
| 7053   | Blue |
| 121890 | Blue |
| 17253  | Blue |
| 4986   | Blue |
| 135610 | Blue |
| 41683  | Blue |
| 46292  | Blue |
| 127277 | Blue |
| 64546  | Blue |
| 135260 | Blue |

---

---

|                      |      |
|----------------------|------|
| 110                  | Blue |
| 139478               | Blue |
| 145492               | Blue |
| 159824               | Blue |
| 9392                 | Blue |
| 3465                 | Blue |
| 135869               | Blue |
| Xylitol              | Grey |
| Valine               | Grey |
| Uridine              | Grey |
| Uric Acid            | Grey |
| Urea                 | Grey |
| Udp-Glucuronic Acid  | Grey |
| Tyrosine             | Grey |
| Tocopherol Alpha-    | Grey |
| Taurine              | Grey |
| Sucrose              | Grey |
| Stearic Acid         | Grey |
| Sorbitol             | Grey |
| Salicylic Acid       | Grey |
| Quinic Acid          | Grey |
| Phosphate            | Grey |
| Phenylethylamine     | Grey |
| Phenylalanine        | Grey |
| Pentadecanoic Acid   | Grey |
| Palmitoleic Acid     | Grey |
| Palmitic Acid        | Grey |
| Ornithine            | Grey |
| Oleic Acid           | Grey |
| Nonadecanoic Acid    | Grey |
| Naproxen             | Grey |
| N-Methylalanine      | Grey |
| N-Acetylglycine NIST | Grey |
| Myristic Acid        | Grey |
| Methionine Sulfoxide | Grey |
| Mannitol             | Grey |
| Maltose              | Grey |
| Lyxitol              | Grey |
| Linoleic Acid        | Grey |
| Levoglucozan         | Grey |
| Leucine              | Grey |
| Lactulose            | Grey |
| Kynurenine           | Grey |
| Ketohexose           | Grey |
| Isothreitol          | Grey |
| Isoleucine           | Grey |
| Isocitric Acid       | Grey |

---

---

|                              |      |
|------------------------------|------|
| Indole-3-Lactate             | Grey |
| Indole-3-Acetate             | Grey |
| Hypoxanthine                 | Grey |
| Hippuric Acid                | Grey |
| Heptadecanoic Acid           | Grey |
| Glycolic Acid                | Grey |
| Glycerol-Alpha-Phosphate     | Grey |
| Glycerol                     | Grey |
| Glyceric Acid                | Grey |
| Glutamic Acid                | Grey |
| Galactose                    | Grey |
| Fucose                       | Grey |
| Ethanolamine                 | Grey |
| Erythritol                   | Grey |
| Deoxycholic Acid             | Grey |
| Cysteine                     | Grey |
| Citric Acid                  | Grey |
| Cellobiose Minor             | Grey |
| Beta-Alanine                 | Grey |
| Behenic Acid                 | Grey |
| Asparagine                   | Grey |
| Aspartic Acid                | Grey |
| Arachidonic Acid             | Grey |
| Arachidic Acid               | Grey |
| Arabitol                     | Grey |
| Aminomalonate                | Grey |
| Adenosine-5-Monophosphate    | Grey |
| Aconitic Acid                | Grey |
| 4-Hydroxyphenylacetic Acid   | Grey |
| 3-Hydroxybutyric Acid        | Grey |
| 3-(1-Pyrazolyl)-L-Alanine    | Grey |
| 2-Hydroxybutanoic Acid       | Grey |
| 2-Deoxyisotetronic Acid NIST | Grey |
| 1,5-Anhydroglucitol          | Grey |
| 1-Monostearin                | Grey |
| 109423                       | Grey |
| 134                          | Grey |
| 4871                         | Grey |
| 2001                         | Grey |
| 31559                        | Grey |
| 26918                        | Grey |
| 26916                        | Grey |
| 1675                         | Grey |
| 160542                       | Grey |
| 4863                         | Grey |
| 68                           | Grey |
| 1064                         | Grey |

---

---

|        |      |
|--------|------|
| 8270   | Grey |
| 16792  | Grey |
| 257    | Grey |
| 132976 | Grey |
| 892    | Grey |
| 42357  | Grey |
| 16788  | Grey |
| 5930   | Grey |
| 119167 | Grey |
| 1148   | Grey |
| 6353   | Grey |
| 31357  | Grey |
| 160    | Grey |
| 3232   | Grey |
| 135619 | Grey |
| 1725   | Grey |
| 109387 | Grey |
| 119023 | Grey |
| 119066 | Grey |
| 9320   | Grey |
| 4956   | Grey |
| 573    | Grey |
| 453    | Grey |
| 41689  | Grey |
| 20903  | Grey |
| 64551  | Grey |
| 4543   | Grey |
| 121002 | Grey |
| 153    | Grey |
| 2039   | Grey |
| 41808  | Grey |
| 21666  | Grey |
| 117171 | Grey |
| 95550  | Grey |
| 62433  | Grey |
| 443    | Grey |
| 5990   | Grey |
| 17651  | Grey |
| 7718   | Grey |
| 17453  | Grey |
| 100253 | Grey |
| 91421  | Grey |
| 160463 | Grey |
| 88583  | Grey |
| 107960 | Grey |
| 2900   | Grey |
| 87720  | Grey |

---

---

|                                                      |           |
|------------------------------------------------------|-----------|
| 119129                                               | Grey      |
| 4975                                                 | Grey      |
| 34075                                                | Grey      |
| 8607                                                 | Grey      |
| 469                                                  | Grey      |
| Udp Glcnac                                           | Turquoise |
| Trans-4-Hydroxyproline                               | Turquoise |
| Tocopherol Gamma-                                    | Turquoise |
| Succinic Acid                                        | Turquoise |
| Shikimic Acid                                        | Turquoise |
| Pyruvic Acid                                         | Turquoise |
| Pyrrole-2-Carboxylic Acid                            | Turquoise |
| Proline                                              | Turquoise |
| Pipecolinic Acid                                     | Turquoise |
| Phosphoethanolamine                                  | Turquoise |
| Pelargonic Acid                                      | Turquoise |
| Parabanic Acid NIST                                  | Turquoise |
| Oxamic Acid                                          | Turquoise |
| Oxalic Acid                                          | Turquoise |
| Nicotinic Acid                                       | Turquoise |
| N-Acetylmannosamine                                  | Turquoise |
| Maltotriose                                          | Turquoise |
| Malic Acid                                           | Turquoise |
| Lactic Acid                                          | Turquoise |
| Hydroxylamine                                        | Turquoise |
| Glycine                                              | Turquoise |
| Dodecanol                                            | Turquoise |
| Dehydroabietic Acid                                  | Turquoise |
| Creatinine                                           | Turquoise |
| Cholesterol                                          | Turquoise |
| Caprylic Acid                                        | Turquoise |
| Alloxanoic Acid NIST                                 | Turquoise |
| Alanine                                              | Turquoise |
| Acetaminophen                                        | Turquoise |
| 3-Aminoisobutyric Acid                               | Turquoise |
| 2,4-Diaminobutyric Acid                              | Turquoise |
| 2,3-Dihydroxybutanoic Acid NIST                      | Turquoise |
| 2-Piperidinobenzonitrile NIST                        | Turquoise |
| 2-Hydroxypyrazinyl-2-Propenoic Acid Ethyl Ester NIST | Turquoise |
| 2-Deoxytetronic Acid                                 | Turquoise |
| 131620                                               | Turquoise |
| 103102                                               | Turquoise |
| 5288                                                 | Turquoise |
| 4938                                                 | Turquoise |
| 4933                                                 | Turquoise |
| 4925                                                 | Turquoise |
| 41708                                                | Turquoise |

---

---

|        |           |
|--------|-----------|
| 5483   | Turquoise |
| 130396 | Turquoise |
| 4942   | Turquoise |
| 4943   | Turquoise |
| 4941   | Turquoise |
| 17537  | Turquoise |
| 3329   | Turquoise |
| 133943 | Turquoise |
| 448    | Turquoise |
| 93947  | Turquoise |
| 3286   | Turquoise |
| 6526   | Turquoise |
| 93385  | Turquoise |
| 6802   | Turquoise |
| 6580   | Turquoise |
| 41697  | Turquoise |
| 3258   | Turquoise |
| 126397 | Turquoise |
| 6579   | Turquoise |
| 17263  | Turquoise |
| 32247  | Turquoise |
| 160543 | Turquoise |
| 13107  | Turquoise |
| 18488  | Turquoise |
| 3029   | Turquoise |
| 4971   | Turquoise |
| 137    | Turquoise |
| 17068  | Turquoise |
| 106634 | Turquoise |
| 4981   | Turquoise |
| 6864   | Turquoise |
| 4898   | Turquoise |
| 21513  | Turquoise |
| 41682  | Turquoise |
| 6538   | Turquoise |
| 4948   | Turquoise |
| 6331   | Turquoise |
| 39     | Turquoise |
| 4976   | Turquoise |
| 1941   | Turquoise |
| 41699  | Turquoise |
| 17664  | Turquoise |
| 145494 | Turquoise |
| 4577   | Turquoise |
| 1981   | Turquoise |
| 106936 | Turquoise |
| 5482   | Turquoise |

---

---

|        |           |
|--------|-----------|
| 1996   | Turquoise |
| 4937   | Turquoise |
| 16561  | Turquoise |
| 120526 | Turquoise |
| 41691  | Turquoise |
| 479    | Turquoise |
| 122151 | Turquoise |
| 87756  | Turquoise |
| 87769  | Turquoise |
| 1700   | Turquoise |
| 657    | Turquoise |
| 473    | Turquoise |
| 5900   | Turquoise |
| 16550  | Turquoise |
| 1872   | Turquoise |
| 490    | Turquoise |
| 120562 | Turquoise |
| 2061   | Turquoise |
| 14509  | Turquoise |
| 1875   | Turquoise |
| 146957 | Turquoise |
| 1878   | Turquoise |
| 1912   | Turquoise |
| 132379 | Turquoise |
| 5346   | Turquoise |
| 47     | Turquoise |
| 62     | Turquoise |
| 1029   | Turquoise |
| 1704   | Turquoise |
| 134336 | Turquoise |
| 112487 | Turquoise |
| 1709   | Turquoise |
| 91     | Turquoise |
| 47170  | Turquoise |
| 6066   | Turquoise |
| 2936   | Turquoise |
| 117141 | Turquoise |
| 132414 | Turquoise |

---



**Table S7. Table S5. Metabolite modules identified by WGCNA among participants who received BAND (n=25)**

| <b>Metabolite</b>       | <b>Module</b> |
|-------------------------|---------------|
| Xylose                  | Blue          |
| Uric Acid               | Blue          |
| Urea                    | Blue          |
| Tocopherol Alpha        | Blue          |
| Threonic Acid           | Blue          |
| Ribonic Acid            | Blue          |
| Pseudo Uridine          | Blue          |
| Phosphoethanolamine     | Blue          |
| N-Acetylornithine       | Blue          |
| Methionine              | Blue          |
| Methanolphosphate       | Blue          |
| Lauric Acid             | Blue          |
| Hydroxylamine           | Blue          |
| Hydrocinnamic Acid      | Blue          |
| Glycolic Acid           | Blue          |
| Glyceric Acid           | Blue          |
| Gluconic Acid           | Blue          |
| Galactonic Acid         | Blue          |
| Fructose                | Blue          |
| Erythritol              | Blue          |
| Dodecanol               | Blue          |
| Dehydroabietic Acid     | Blue          |
| Cholesterol             | Blue          |
| Capric Acid             | Blue          |
| Butane-2,3-Diol NIST    | Blue          |
| Benzoic Acid            | Blue          |
| Allantoin               | Blue          |
| Allantoic Acid          | Blue          |
| 3,6-Anhydro-D-Galactose | Blue          |
| 2-Hydroxyvaleric Acid   | Blue          |
| 2-Deoxytetronic Acid    | Blue          |
| 4928                    | Blue          |
| 4922                    | Blue          |
| 54                      | Blue          |
| 4985                    | Blue          |
| 135889                  | Blue          |
| 4927                    | Blue          |
| 160464                  | Blue          |
| 7402                    | Blue          |
| 160542                  | Blue          |
| 87710                   | Blue          |
| 7403                    | Blue          |
| 4936                    | Blue          |

---

|                      |      |
|----------------------|------|
| 915                  | Blue |
| 160313               | Blue |
| 130396               | Blue |
| 8270                 | Blue |
| 16792                | Blue |
| 4609                 | Blue |
| 98027                | Blue |
| 7440                 | Blue |
| 111162               | Blue |
| 2806                 | Blue |
| 133943               | Blue |
| 5085                 | Blue |
| 4887                 | Blue |
| 4546                 | Blue |
| 4929                 | Blue |
| 139436               | Blue |
| 16788                | Blue |
| 119167               | Blue |
| 160543               | Blue |
| 6353                 | Blue |
| 137                  | Blue |
| 4945                 | Blue |
| 7053                 | Blue |
| 121890               | Blue |
| 17253                | Blue |
| 4986                 | Blue |
| 4577                 | Blue |
| 64551                | Blue |
| 46292                | Blue |
| 127277               | Blue |
| 4543                 | Blue |
| 110                  | Blue |
| 16550                | Blue |
| 139478               | Blue |
| 14509                | Blue |
| 5346                 | Blue |
| 1704                 | Blue |
| 62433                | Blue |
| 145492               | Blue |
| 135869               | Blue |
| 119129               | Blue |
| 8607                 | Blue |
| Valine               | Grey |
| Uridine              | Grey |
| UDP -Glucuronic Acid | Grey |
| UDP GlcNac           | Grey |
| Tyrosine             | Grey |

---

---

|                               |      |
|-------------------------------|------|
| Trans-4-Hydroxyproline        | Grey |
| Tocopherol Gamma-             | Grey |
| Threonine                     | Grey |
| Tagatose                      | Grey |
| Sucrose                       | Grey |
| Sorbitol                      | Grey |
| Shikimic Acid                 | Grey |
| Serine                        | Grey |
| Salicylic Acid                | Grey |
| Quinic Acid                   | Grey |
| Pyruvic Acid                  | Grey |
| Pyrophosphate                 | Grey |
| Pipecolinic Acid              | Grey |
| Pinitol                       | Grey |
| Phosphate                     | Grey |
| Phenylalanine                 | Grey |
| Pentadecanoic Acid            | Grey |
| Ornithine                     | Grey |
| Nonadecanoic Acid             | Grey |
| Naproxen                      | Grey |
| N-Methylalanine               | Grey |
| N-Acetylglycine NIST          | Grey |
| Myo-Inositol                  | Grey |
| Mannose                       | Grey |
| Mannitol                      | Grey |
| Maltotriose                   | Grey |
| Maltose                       | Grey |
| Lyxitol                       | Grey |
| Levogluconan                  | Grey |
| Leucine                       | Grey |
| Lactulose                     | Grey |
| Lactic Acid                   | Grey |
| Kynurenine                    | Grey |
| Ketohexose                    | Grey |
| Isoleucine                    | Grey |
| Isocitric Acid                | Grey |
| Indole-3-Lactate              | Grey |
| Indole-3-Acetate              | Grey |
| Hypoxanthine                  | Grey |
| Hydroxyproline Dipeptide NIST | Grey |
| Hippuric Acid                 | Grey |
| Hexuronic Acid                | Grey |
| Hexitol                       | Grey |
| Glycine                       | Grey |
| Glycerol-Alpha-Phosphate      | Grey |
| Glutamic Acid                 | Grey |
| Glucose                       | Grey |

---

---

|                                                      |      |
|------------------------------------------------------|------|
| Galactose                                            | Grey |
| Fucose                                               | Grey |
| Ethanolamine                                         | Grey |
| Deoxycholic Acid                                     | Grey |
| Cysteine                                             | Grey |
| Conduritol-Beta-Expoxide                             | Grey |
| Citric Acid                                          | Grey |
| Cellobiose Minor                                     | Grey |
| Beta-Alanine                                         | Grey |
| Behenic Acid                                         | Grey |
| Aspartic Acid                                        | Grey |
| Arachidic Acid                                       | Grey |
| Alanine                                              | Grey |
| Adenosine-5-Monophosphate                            | Grey |
| Aconitic Acid                                        | Grey |
| Acetaminophen                                        | Grey |
| 4-Hydroxyphenylacetic Acid                           | Grey |
| 3-Hydroxybutyric Acid                                | Grey |
| 3-(1-Pyrazolyl)-L-Alanine                            | Grey |
| 2,3-Dihydroxybutanoic Acid NIST                      | Grey |
| 2-Hydroxypyrazinyl-2-Propenoic Acid Ethyl Ester NIST | Grey |
| 2-Hydroxybutanoic Acid                               | Grey |
| 2-Deoxyisotetronic Acid NIST                         | Grey |
| 1-Monostearin                                        | Grey |
| 1-Monopalmitin                                       | Grey |
| 131620                                               | Grey |
| 103102                                               | Grey |
| 6646                                                 | Grey |
| 109423                                               | Grey |
| 134                                                  | Grey |
| 2001                                                 | Grey |
| 31559                                                | Grey |
| 26918                                                | Grey |
| 26916                                                | Grey |
| 6115                                                 | Grey |
| 1675                                                 | Grey |
| 4863                                                 | Grey |
| 1064                                                 | Grey |
| 132976                                               | Grey |
| 892                                                  | Grey |
| 42357                                                | Grey |
| 5930                                                 | Grey |
| 32247                                                | Grey |
| 1148                                                 | Grey |
| 3029                                                 | Grey |
| 160                                                  | Grey |
| 17068                                                | Grey |

---

---

|        |      |
|--------|------|
| 3232   | Grey |
| 135619 | Grey |
| 1725   | Grey |
| 109387 | Grey |
| 9320   | Grey |
| 4956   | Grey |
| 1981   | Grey |
| 573    | Grey |
| 453    | Grey |
| 135610 | Grey |
| 4937   | Grey |
| 41683  | Grey |
| 41689  | Grey |
| 479    | Grey |
| 20903  | Grey |
| 87769  | Grey |
| 153    | Grey |
| 2039   | Grey |
| 64546  | Grey |
| 135260 | Grey |
| 1872   | Grey |
| 120562 | Grey |
| 2061   | Grey |
| 1875   | Grey |
| 1912   | Grey |
| 21666  | Grey |
| 132379 | Grey |
| 47     | Grey |
| 62     | Grey |
| 1029   | Grey |
| 134336 | Grey |
| 117171 | Grey |
| 112487 | Grey |
| 1709   | Grey |
| 443    | Grey |
| 6066   | Grey |
| 17651  | Grey |
| 2936   | Grey |
| 17453  | Grey |
| 100253 | Grey |
| 91421  | Grey |
| 160463 | Grey |
| 88583  | Grey |
| 117141 | Grey |
| 3465   | Grey |
| 107960 | Grey |
| 2900   | Grey |

---

---

|                               |           |
|-------------------------------|-----------|
| 87720                         | Grey      |
| 4975                          | Grey      |
| 34075                         | Grey      |
| 469                           | Grey      |
| Xylitol                       | Turquoise |
| Tryptophan                    | Turquoise |
| Isothreonic Acid              | Turquoise |
| Taurine                       | Turquoise |
| Succinic Acid                 | Turquoise |
| Stearic Acid                  | Turquoise |
| Pyrrole-2-Carboxylic Acid     | Turquoise |
| Proline                       | Turquoise |
| Phenylethylamine              | Turquoise |
| Pelargonic Acid               | Turquoise |
| Parabanic Acid NIST           | Turquoise |
| Palmitoleic Acid              | Turquoise |
| Palmitic Acid                 | Turquoise |
| Oxoproline                    | Turquoise |
| Oxamic Acid                   | Turquoise |
| Oxalic Acid                   | Turquoise |
| Oleic Acid                    | Turquoise |
| Nicotinic Acid                | Turquoise |
| N-Acetylmannosamine           | Turquoise |
| N-Acetylglutamate             | Turquoise |
| Myristic Acid                 | Turquoise |
| Methionine Sulfoxide          | Turquoise |
| Malic Acid                    | Turquoise |
| Lysine                        | Turquoise |
| Linoleic Acid                 | Turquoise |
| Isothreitol                   | Turquoise |
| Histidine                     | Turquoise |
| Heptadecanoic Acid            | Turquoise |
| Glycerol                      | Turquoise |
| Glutamine                     | Turquoise |
| Fumaric Acid                  | Turquoise |
| Cystine                       | Turquoise |
| Cysteine-Glycine              | Turquoise |
| Creatinine                    | Turquoise |
| Caprylic Acid                 | Turquoise |
| Asparagine                    | Turquoise |
| Arachidonic Acid              | Turquoise |
| Arabitol                      | Turquoise |
| Aminomalonate                 | Turquoise |
| Alloxanoic Acid NIST          | Turquoise |
| 3-Aminoisobutyric Acid        | Turquoise |
| 2,4-Diaminobutyric Acid       | Turquoise |
| 2-Piperidinobenzonitrile NIST | Turquoise |

---

---

|                        |           |
|------------------------|-----------|
| 2-Hydroxyglutaric Acid | Turquoise |
| 1,5-Anhydroglucitol    | Turquoise |
| 5288                   | Turquoise |
| 4938                   | Turquoise |
| 4933                   | Turquoise |
| 4925                   | Turquoise |
| 4926                   | Turquoise |
| 4871                   | Turquoise |
| 41708                  | Turquoise |
| 307                    | Turquoise |
| 4932                   | Turquoise |
| 5483                   | Turquoise |
| 68                     | Turquoise |
| 4942                   | Turquoise |
| 4943                   | Turquoise |
| 4983                   | Turquoise |
| 4941                   | Turquoise |
| 106629                 | Turquoise |
| 4533                   | Turquoise |
| 17537                  | Turquoise |
| 3329                   | Turquoise |
| 448                    | Turquoise |
| 5419                   | Turquoise |
| 93947                  | Turquoise |
| 257                    | Turquoise |
| 3286                   | Turquoise |
| 6526                   | Turquoise |
| 61                     | Turquoise |
| 93385                  | Turquoise |
| 6802                   | Turquoise |
| 6580                   | Turquoise |
| 41697                  | Turquoise |
| 3258                   | Turquoise |
| 126397                 | Turquoise |
| 6579                   | Turquoise |
| 592                    | Turquoise |
| 2011                   | Turquoise |
| 17263                  | Turquoise |
| 13107                  | Turquoise |
| 31357                  | Turquoise |
| 18488                  | Turquoise |
| 139467                 | Turquoise |
| 4971                   | Turquoise |
| 106634                 | Turquoise |
| 4981                   | Turquoise |
| 6864                   | Turquoise |
| 4600                   | Turquoise |

---

---

|        |           |
|--------|-----------|
| 4898   | Turquoise |
| 21513  | Turquoise |
| 41682  | Turquoise |
| 6538   | Turquoise |
| 4948   | Turquoise |
| 6331   | Turquoise |
| 39     | Turquoise |
| 119023 | Turquoise |
| 4976   | Turquoise |
| 1941   | Turquoise |
| 41699  | Turquoise |
| 17664  | Turquoise |
| 145494 | Turquoise |
| 119066 | Turquoise |
| 106936 | Turquoise |
| 5482   | Turquoise |
| 1996   | Turquoise |
| 16561  | Turquoise |
| 120526 | Turquoise |
| 41691  | Turquoise |
| 122151 | Turquoise |
| 87756  | Turquoise |
| 121002 | Turquoise |
| 1700   | Turquoise |
| 657    | Turquoise |
| 473    | Turquoise |
| 41808  | Turquoise |
| 5900   | Turquoise |
| 490    | Turquoise |
| 146957 | Turquoise |
| 1878   | Turquoise |
| 95550  | Turquoise |
| 91     | Turquoise |
| 47170  | Turquoise |
| 5990   | Turquoise |
| 7718   | Turquoise |
| 159824 | Turquoise |
| 9392   | Turquoise |
| 132414 | Turquoise |

---



**Table S8. Module differentially connectivity analysis (MDC) (RYGB vs. IMI)**

| <b>Module</b> | <b>Size</b> | <b>Connectivity</b> | <b>q value</b> | <b>Category</b>      |
|---------------|-------------|---------------------|----------------|----------------------|
| Brown         | 51          | -0.73               | 0.976          | Conserved            |
| Turquoise     | 76          | -19.8               | 0.341          | Conserved            |
| Blue          | 74          | 82.72               | 0.001          | Gain of connectivity |
| Yellow        | 30          | 10.09               | 0.09           | Conserved            |

**Table S9. Module differentially connectivity analysis (MDC) (RYGB vs BAND)**

| <b>Module</b> | <b>Size</b> | <b>Connectivity</b> | <b>q value</b> | <b>Category</b>      |
|---------------|-------------|---------------------|----------------|----------------------|
| Brown         | 51          | 11.46               | 0.72           | Conserved            |
| Turquoise     | 76          | -41.92              | 0.048          | Loss of connectivity |
| Blue          | 74          | 89.67               | 0.013          | Gain of connectivity |
| Yellow        | 30          | 10.91               | 0.06           | Conserved            |

**Table S10. List of metabolites included in the enrichment analysis**

| <b>Metabolites included in the blue module in RYGB (n=37)</b> | <b>Metabolites matched (n=34)</b>       | <b>HMDB (n=34)</b> | <b>KEGG (n=34)</b> |
|---------------------------------------------------------------|-----------------------------------------|--------------------|--------------------|
| Valine                                                        | L-Valine                                | HMDB0000883        | C00183             |
| Urea                                                          | Urea                                    | HMDB0000294        | C00086             |
| UDP GlcNac                                                    | Uridine diphosphate-N-acetylglucosamine | HMDB0000290        | C00043             |
| Tyrosine                                                      | L-Tyrosine                              | HMDB0000158        | C00082             |
| Trans-4-Hydroxyproline                                        | 4-Hydroxyproline                        | HMDB0000725        | C01157             |
| Threonine                                                     | L-Threonine                             | HMDB0000167        | C00188             |
| Serine                                                        | Serine                                  | HMDB0062263        | C00716             |
| Pyrophosphate                                                 | Pyrophosphate                           | HMDB0000250        | C00013             |
| Pseudo Uridine                                                | Pseudouridine                           | HMDB0000767        | C02067             |
| Proline                                                       | L-Proline                               | HMDB0000162        | C00148             |
| Phosphate                                                     | Phosphate                               | HMDB0001429        | C00009             |
| Phenylalanine                                                 | L-Phenylalanine                         | HMDB0000159        | C00079             |
| Pelargonic Acid                                               | Pelargonic acid                         | HMDB0000847        | C01601             |
| Oxoproline                                                    | Pyroglutamic acid                       | HMDB0000267        | C01879             |
| Ornithine                                                     | Ornithine                               | HMDB0000214        | C00077             |
| Myo-Inositol                                                  | myo-Inositol                            | HMDB0000211        | C00137             |
| Methionine                                                    | L-Methionine                            | HMDB0000696        | C00073             |
| Methanolphosphate                                             | NA                                      | NA                 | NA                 |
| Lyxitol                                                       | L-Arabitol                              | HMDB0001851        | C00532             |
| Leucine                                                       | L-Leucine                               | HMDB0000687        | C00123             |
| Isothreitol                                                   | NA                                      | NA                 | NA                 |
| Isoleucine                                                    | L-Isoleucine                            | HMDB0000172        | C00407             |
| Indole-3-Lactate                                              | Indolelactic acid                       | HMDB0000671        | C02043             |
| Glycine                                                       | Glycine                                 | HMDB0000123        | C00037             |
| Glycerol-3-Phosphate                                          | Glycerol 3-phosphate                    | HMDB0000126        | C00093             |
| Galactose                                                     | D-Galactose                             | HMDB0000143        | C00984             |
| Dodecanol                                                     | Dodecanol                               | HMDB0011626        | C02277             |
| Dehydroabiatic Acid                                           | Dehydroabiatic acid                     | HMDB0061925        | C12078             |
| Conduritol-Beta-Expoxide                                      | NA                                      | NA                 | NA                 |
| Cholesterol                                                   | Cholesterol                             | HMDB0000067        | C00187             |
| Caprylic Acid                                                 | Caprylic acid                           | HMDB0000482        | C06423             |
| Asparagine                                                    | L-Asparagine                            | HMDB0000168        | C00152             |
| Aminomalonate                                                 | Aminomalononic acid                     | HMDB0001147        | C00872             |
| Alanine                                                       | L-Alanine                               | HMDB0000161        | C00041             |
| Acetaminophen                                                 | Acetaminophen                           | HMDB0001859        | C06804             |
| 4-Hydroxyphenylacetic Acid                                    | p-Hydroxyphenylacetic acid              | HMDB0000020        | C00642             |
| 2-Hydroxyvaleric Acid                                         | 2-Hydroxyvaleric acid                   | HMDB0001863        | NA                 |

**Table S11. List of background metabolites included in the enrichment analysis**

| <b>Our background data</b> | <b>Matched</b>             | <b>HMDB</b> | <b>KEGG</b> |
|----------------------------|----------------------------|-------------|-------------|
| 1,5-anhydroglucitol        | 1,5-Anhydrosorbitol        | HMDB0002712 | C07326      |
| Glycerol-3-phosphate       | Glycerol 3-phosphate       | HMDB0000126 | C00093      |
| Valine                     | L-Valine                   | HMDB0000883 | C00183      |
| Isoleucine                 | L-Isoleucine               | HMDB0000172 | C00407      |
| Shikimic acid              | Shikimic acid              | HMDB0003070 | C00493      |
| Fructose                   | D-Fructose                 | HMDB0000660 | C02336      |
| Quinic acid                | Quinic acid                | HMDB0003072 | C00296      |
| Pyrophosphate              | Pyrophosphate              | HMDB0000250 | C00013      |
| Galactonic acid            | Galactonic acid            | HMDB0000565 | C00880      |
| Leucine                    | L-Leucine                  | HMDB0000687 | C00123      |
| Cholesterol                | Cholesterol                | HMDB0000067 | C00187      |
| 4-hydroxyphenylacetic acid | p-Hydroxyphenylacetic acid | HMDB0000020 | C00642      |
| Taurine                    | Taurine                    | HMDB0000251 | C00245      |
| Threonine                  | L-Threonine                | HMDB0000167 | C00188      |
| Ornithine                  | Ornithine                  | HMDB0000214 | C00077      |
| Mannitol                   | Mannitol                   | HMDB0000765 | C00392      |
| Phenylalanine              | L-Phenylalanine            | HMDB0000159 | C00079      |
| Indole-3-acetate           | Indoleacetic acid          | HMDB0000197 | C00954      |
| Allantoin                  | Allantoin                  | HMDB0000462 | C01551      |
| Pipecolic acid             | Pipecolic acid             | HMDB0000070 | C00408      |
| Oxoproline                 | Pyroglutamic acid          | HMDB0000267 | C01879      |
| N-acetylmannosamine        | N-Acetylmannosamine        | HMDB0001129 | C00645      |
| Tyrosine                   | L-Tyrosine                 | HMDB0000158 | C00082      |
| Uric acid                  | Uric acid                  | HMDB0000289 | C00366      |
| Glucose                    | D-Glucose                  | HMDB0000122 | C00221      |
| Aspartic acid              | L-Aspartic acid            | HMDB0000191 | C00049      |
| Acetaminophen              | Acetaminophen              | HMDB0001859 | C06804      |
| Allantoic acid             | Allantoic acid             | HMDB0001209 | C00499      |
| Pyrrole-2-carboxylic acid  | Pyrrole-2-carboxylic acid  | HMDB0004230 | C05942      |
| Aminomalonate              | Aminomalononic acid        | HMDB0001147 | C00872      |
| Dodecanol                  | Dodecanol                  | HMDB0011626 | C02277      |
| Galactose                  | D-Galactose                | HMDB0000143 | C00984      |
| Indole-3-lactate           | Indolelactic acid          | HMDB0000671 | C02043      |
| Kynurenine                 | L-Kynurenine               | HMDB0000684 | C00328      |
| Phosphoethanolamine        | O-Phosphoethanolamine      | HMDB0000224 | C00346      |
| 3-hydroxybutyric acid      | 3-Hydroxybutyric acid      | HMDB0000357 | C01089      |
| Ethanolamine               | Ethanolamine               | HMDB0000149 | C00189      |
| Oxalic acid                | Oxalic acid                | HMDB0002329 | C00209      |
| Xylitol                    | D-Xylitol                  | HMDB0002917 | C00379      |
| N-acetylornithine          | N-Acetylornithine          | HMDB0003357 | C00437      |
| Gluconic acid              | Gluconic acid              | HMDB0000625 | C00257      |
| Trans-4-hydroxyproline     | 4-Hydroxyproline           | HMDB0000725 | C01157      |

|                           |                                          |             |        |
|---------------------------|------------------------------------------|-------------|--------|
| Lactulose                 | Lactulose                                | HMDB0000740 | C07064 |
| Capric acid               | Capric acid                              | HMDB0000511 | C01571 |
| Glycine                   | Glycine                                  | HMDB0000123 | C00037 |
| Arachidonic acid          | Arachidonic acid                         | HMDB0001043 | C00219 |
| Dehydroabiestic acid      | Dehydroabiestic acid                     | HMDB0061925 | C12078 |
| Fucose                    | L-Fucose                                 | HMDB0000174 | C01019 |
| Alanine                   | L-Alanine                                | HMDB0000161 | C00041 |
| Myristic acid             | Myristic acid                            | HMDB0000806 | C06424 |
| UDP GlcNAc                | Uridine diphosphate-N-acetylglucosamine  | HMDB0000290 | C00043 |
| Hypoxanthine              | Hypoxanthine                             | HMDB0000157 | C00262 |
| Phenylethylamine          | Phenylethylamine                         | HMDB0012275 | C05332 |
| Phosphate                 | Phosphate                                | HMDB0001429 | C00009 |
| Urea                      | Urea                                     | HMDB0000294 | C00086 |
| Lyxitol                   | L-Arabitol                               | HMDB0001851 | C00532 |
| Nicotinic acid            | Nicotinic acid                           | HMDB0001488 | C00253 |
| Methionine                | L-Methionine                             | HMDB0000696 | C00073 |
| Levoglucozan              | Levoglucozan                             | HMDB0000640 | NA     |
| Lauric acid               | Dodecanoic acid                          | HMDB0000638 | C02679 |
| Hippuric acid             | Hippuric acid                            | HMDB0000714 | C01586 |
| Serine                    | Serine                                   | HMDB0062263 | C00716 |
| Naproxen                  | Naproxen                                 | HMDB0001923 | C01517 |
| Glycolic acid             | Glycolic acid                            | HMDB0000115 | C03547 |
| Hydroxylamine             | Hydroxylamine                            | HMDB0003338 | C00192 |
| Benzoic acid              | Benzoic acid                             | HMDB0001870 | C00539 |
| 2-hydroxybutanoic acid    | 2-Hydroxybutyric acid                    | HMDB0000008 | C05984 |
| Threonic acid             | Threonic acid                            | HMDB0000943 | C01620 |
| 2-deoxytetronic acid      | (S)-3,4-Dihydroxybutyric acid            | HMDB0000337 | NA     |
| Oleic acid                | Oleic acid                               | HMDB0000207 | C00712 |
| Creatinine                | Creatinine                               | HMDB0000562 | C00791 |
| 2,4-diaminobutyric acid   | 2,4-Diaminobutyric acid                  | HMDB0002362 | NA     |
| Pinitol                   | D-Pinitol                                | HMDB0034219 | C03844 |
| Beta-alanine              | Beta-Alanine                             | HMDB0000056 | C00099 |
| Succinic acid             | Succinic acid                            | HMDB0000254 | C00042 |
| N-acetylglutamate         | N-Acetylglutamic acid                    | HMDB0001138 | C00624 |
| Maltotriose               | Maltotriose                              | HMDB0001262 | C01835 |
| N-methylalanine           | N-Methylalanine                          | HMDB0094692 | C02721 |
| Adenosine-5-monophosphate | Adenosine monophosphate                  | HMDB0000045 | C00020 |
| 2-hydroxyglutaric acid    | 4-Amino-5-aminomethyl-2-methylpyrimidine | NA          | C20267 |
| 1-monostearin             | Glycerol 1-octadecanoate                 | HMDB0031075 | NA     |
| Deoxycholic acid          | Deoxycholic acid                         | HMDB0000626 | C04483 |
| Sorbitol                  | Sorbitol                                 | HMDB0000247 | C00794 |
| Fumaric acid              | Fumaric acid                             | HMDB0000134 | C00122 |
| Myo-inositol              | myo-Inositol                             | HMDB0000211 | C00137 |
| Arabitol                  | D-Arabitol                               | HMDB0000568 | C01904 |

|                        |                                     |             |        |
|------------------------|-------------------------------------|-------------|--------|
| Malic acid             | Malic acid                          | HMDB0000744 | C03668 |
| Arachidic acid         | Arachidic acid                      | HMDB0002212 | C06425 |
| Cysteine-glycine       | Cysteinylglycine                    | HMDB0000078 | C01419 |
| Mannose                | D-Mannose                           | HMDB0000169 | C00936 |
| Pyruvic acid           | Pyruvic acid                        | HMDB0000243 | C00022 |
| Linoleic acid          | Linoleic acid                       | HMDB0000673 | C01595 |
| Glyceric acid          | Glyceric acid                       | HMDB0000139 | C00258 |
| UDP-glucuronic acid    | Uridine diphosphate glucuronic acid | HMDB0000935 | C00167 |
| Heptadecanoic acid     | Heptadecanoic acid                  | HMDB0002259 | NA     |
| Caprylic acid          | Caprylic acid                       | HMDB0000482 | C06423 |
| Uridine                | Uridine                             | HMDB0000296 | C00299 |
| Lysine                 | L-Lysine                            | HMDB0000182 | C00047 |
| Pentadecanoic acid     | Pentadecanoic acid                  | HMDB0000826 | C16537 |
| Tagatose               | D-Tagatose                          | HMDB0003418 | C00795 |
| Palmitic acid          | Palmitic acid                       | HMDB0000220 | C00249 |
| Glutamine              | L-Glutamine                         | HMDB0000641 | C00064 |
| Glycerol               | Glycerol                            | HMDB0000131 | C00116 |
| Glutamic acid          | L-Glutamic acid                     | HMDB0000148 | C00025 |
| Ribonic acid           | Ribonic acid                        | HMDB0000867 | C01685 |
| Hydrocinnamic acid     | Hydrocinnamic acid                  | HMDB0000764 | C05629 |
| Histidine              | L-Histidine                         | HMDB0000177 | C00135 |
| Hexitol                | Galactitol                          | HMDB0000107 | C01697 |
| Erythritol             | Erythritol                          | HMDB0002994 | C00503 |
| Maltose                | Maltose                             | HMDB0037138 | C00897 |
| 3-aminoisobutyric acid | 3-Aminoisobutanoic acid             | HMDB0003911 | C05145 |
| Tryptophan             | L-Tryptophan                        | HMDB0000929 | C00078 |
| 1-monopalmitin         | MG(16:0/0:0/0:0)                    | HMDB0011564 | NA     |
| Aconitic acid          | cis-Aconitic acid                   | HMDB0000072 | C00417 |
| Pseudo uridine         | Pseudouridine                       | HMDB0000767 | C02067 |
| Pelargonic acid        | Pelargonic acid                     | HMDB0000847 | C01601 |
| Nonadecanoic acid      | Nonadecanoic acid                   | HMDB0000772 | C16535 |
| Xylose                 | D-Xylose                            | HMDB0000098 | C00181 |
| Cystine                | L-Cystine                           | HMDB0000192 | C00491 |
| Sucrose                | Sucrose                             | HMDB0000258 | C00089 |
| Isocitric acid         | Isocitric acid                      | HMDB0000193 | C00311 |
| 2-hydroxyvaleric acid  | 2-Hydroxyvaleric acid               | HMDB0001863 | NA     |
| Behenic acid           | Behenic acid                        | HMDB0000944 | C08281 |
| Stearic acid           | Stearic acid                        | HMDB0000827 | C01530 |
| Salicylic acid         | Salicylic acid                      | HMDB0001895 | C00805 |
| Asparagine             | L-Asparagine                        | HMDB0000168 | C00152 |
| Cysteine               | L-Cysteine                          | HMDB0000574 | C00097 |
| Proline                | L-Proline                           | HMDB0000162 | C00148 |
| Citric acid            | Citric acid                         | HMDB0000094 | C00158 |
| Palmitoleic acid       | Palmitoleic acid                    | HMDB0003229 | C08362 |
| Lactic acid            | L-Lactic acid                       | HMDB0000190 | C00186 |
| Methionine sulfoxide   | Methionine sulfoxide                | HMDB0002005 | C02989 |

**Table S12. Pathway enrichment analysis for metabolites included in the blue module (RYGB vs BAND)**

| Pathway                                             | Total | Expected | Hits | P-value* | FDR** | Impact |
|-----------------------------------------------------|-------|----------|------|----------|-------|--------|
| Aminoacyl-tRNA biosynthesis                         | 18    | 5.111    | 11   | 0.001    | 0.057 | 0.000  |
| Valine, leucine and isoleucine biosynthesis         | 4     | 1.136    | 4    | 0.005    | 0.149 | 0.000  |
| Valine, leucine and isoleucine degradation          | 3     | 0.852    | 3    | 0.021    | 0.387 | 0.000  |
| Phenylalanine, tyrosine and tryptophan biosynthesis | 2     | 0.568    | 2    | 0.078    | 1.000 | 1.000  |
| Arginine and proline metabolism                     | 5     | 1.420    | 3    | 0.136    | 1.000 | 0.249  |

Total: total number of compounds in the pathway; the Hits is the actually matched number from the user uploaded data; the Impact is the pathway impact value calculated from pathway topology analysis. \*P values are calculated from the enrichment analysis; \*\* FDR is the p value adjusted using false discovery rate;

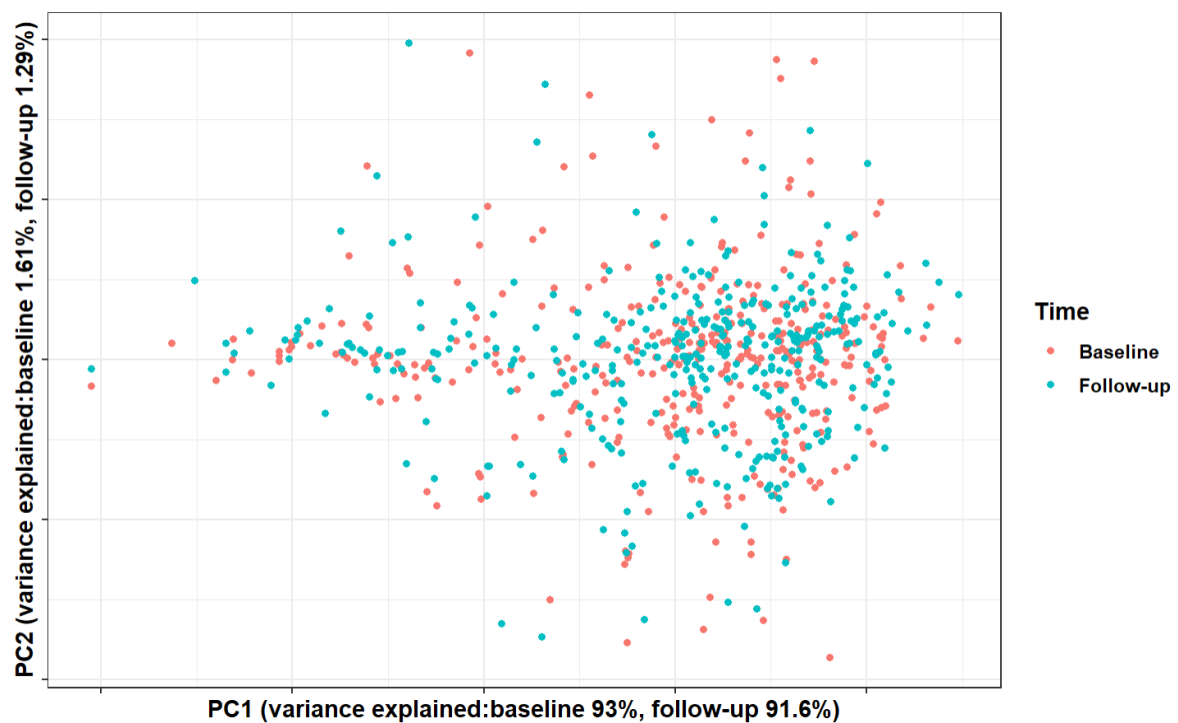

**Figure S1.** Principal component analysis shows that there are no clear batches in our metabolomic data. Each dot represents a metabolite measured at baseline (red) or 1-year follow-up (green). No clear batch was observed for metabolites measured at baseline and follow-up. PC1: principal component 1, PC2: principal component 2.



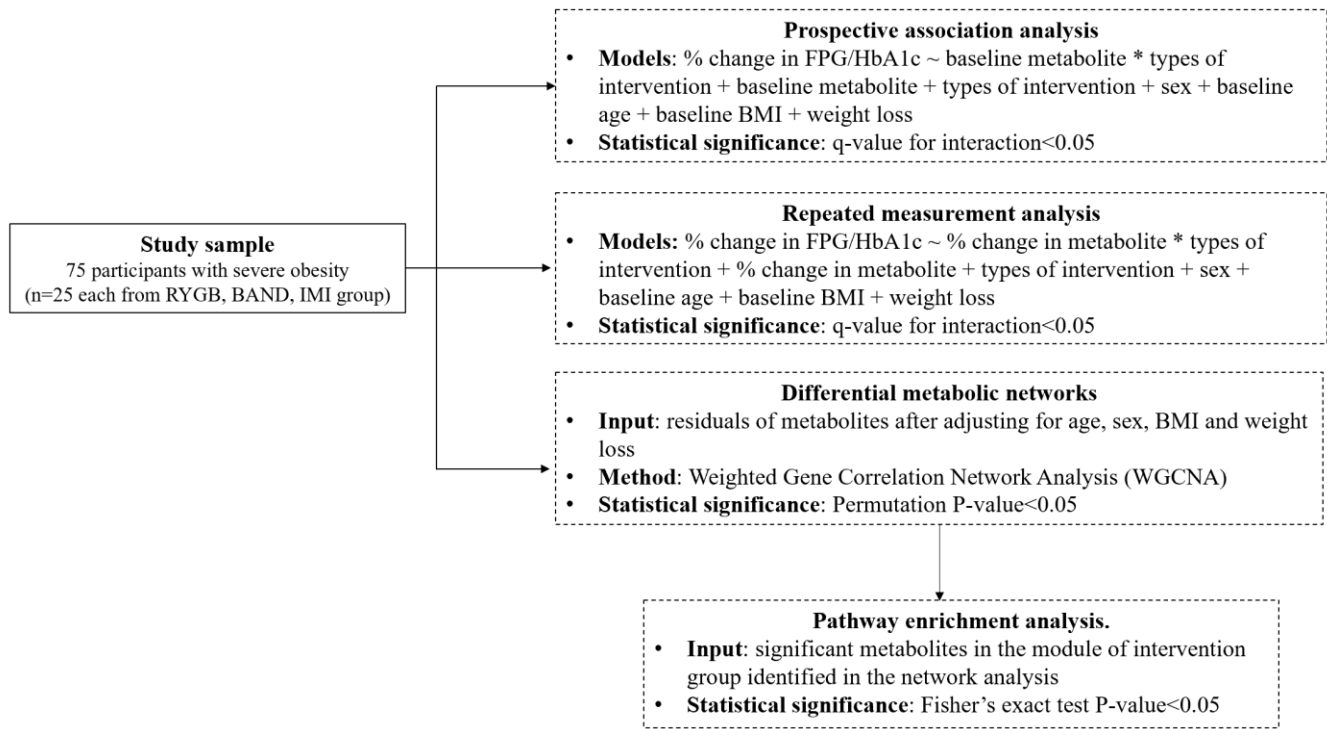

**Figure S2.** Statistical Analysis flowchart.

Abbreviations: RYGB, Roux-en-Y gastric bypass; BAND, adjustable gastric band; IMI, intensive medical intervention; FPG, fasting plasma glucose; HbA1c, hemoglobin A1c; FDR, false discovery rate;

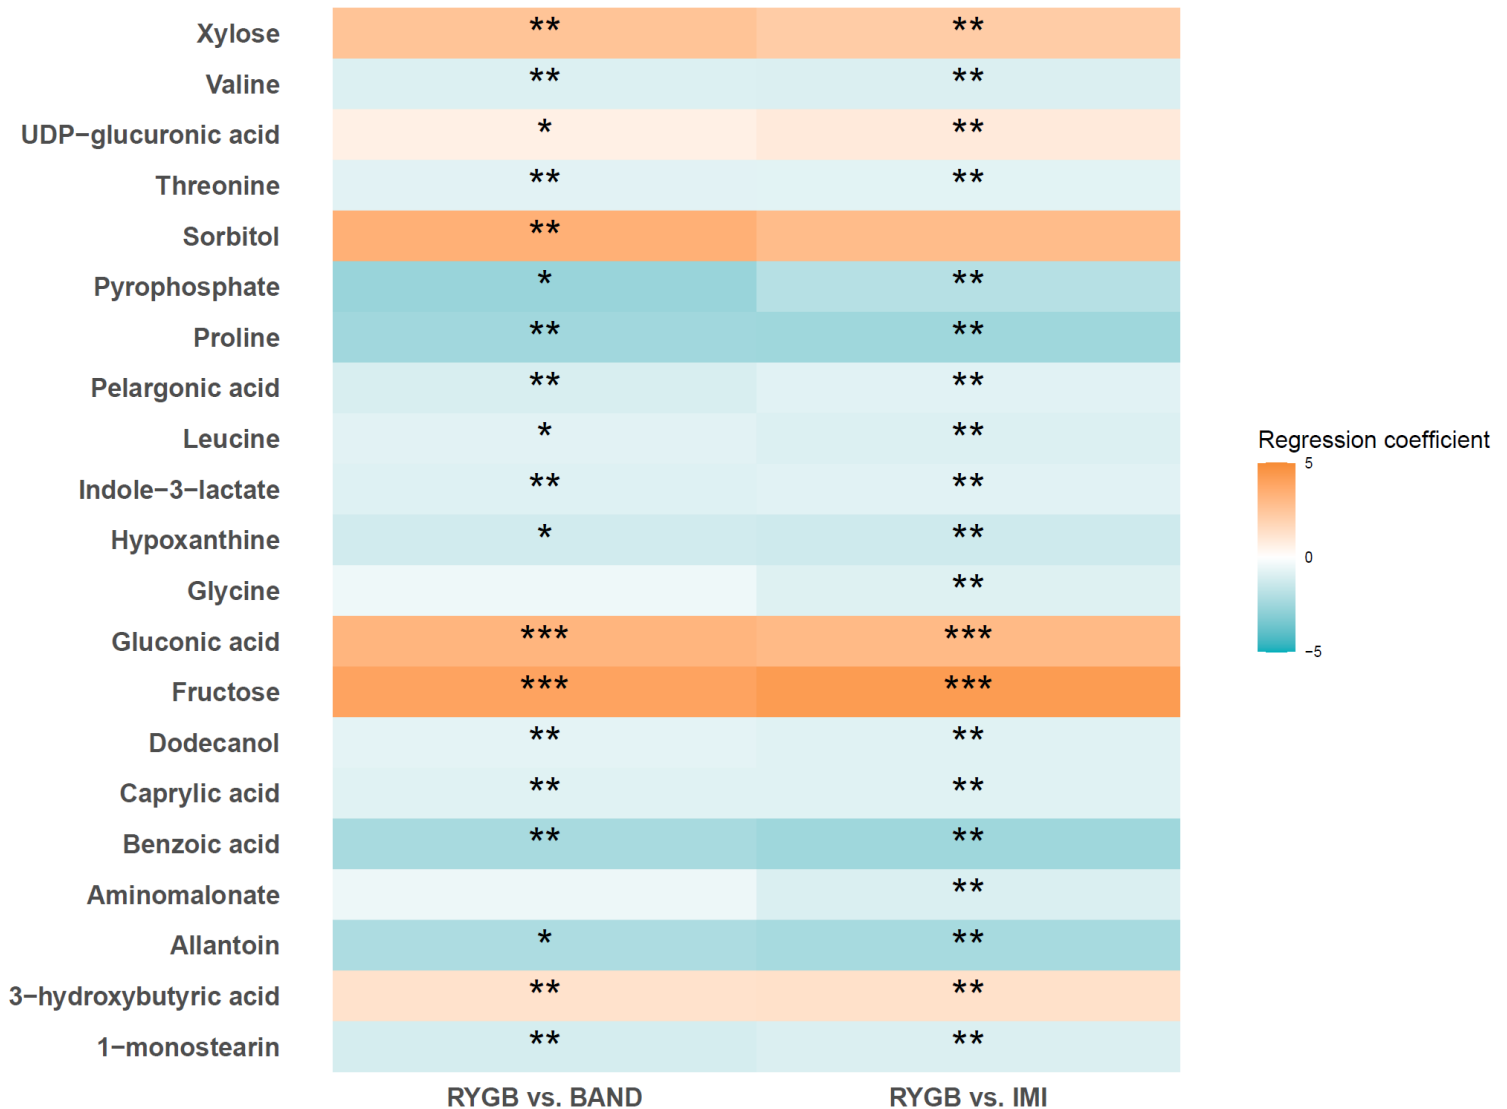

**Figure S3.** Heatmap showing the longitudinal association between changes in plasma metabolites and changes in fasting plasma glucose (FPG) in response to different weight-loss interventions. Each row represents a metabolite, and each column represents a different comparison group. Only significant metabolites with  $P < 0.05$  are shown here. Color codes are based on the regression coefficients obtained from the linear regression model, adjusting for weight loss, sex, baseline age, BMI. \* $P < 0.05$ , \*\* $q < 0.01$ , \*\*\* $q < 0.001$

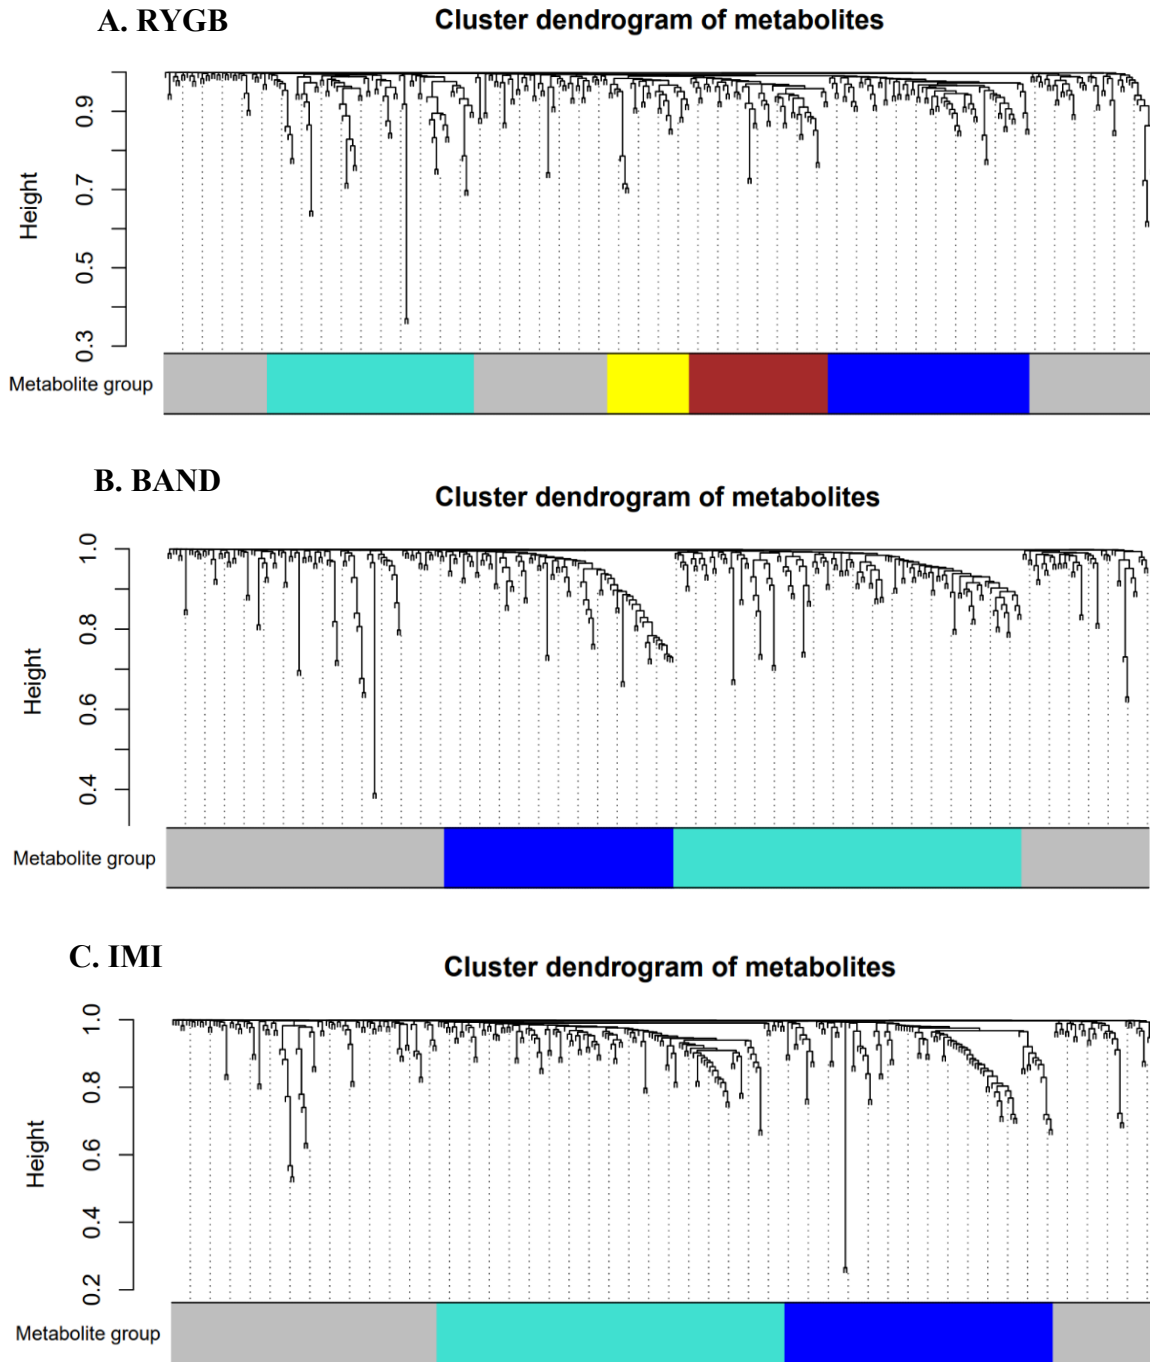

**Figure S4.** Membership of co-regulated metabolites modules identified by WGCNA in the RYGB group (A), the BAND group (B) and the IMI group (C). Co-regulation dendrogram was obtained by clustering the dissimilarity of metabolites based on topological overlap matrix distance. Highly co-regulated metabolites are represented by a unique color under the dendrogram, which is denoted by the module memberships. Grey color indicates that metabolites did not fall into any module.

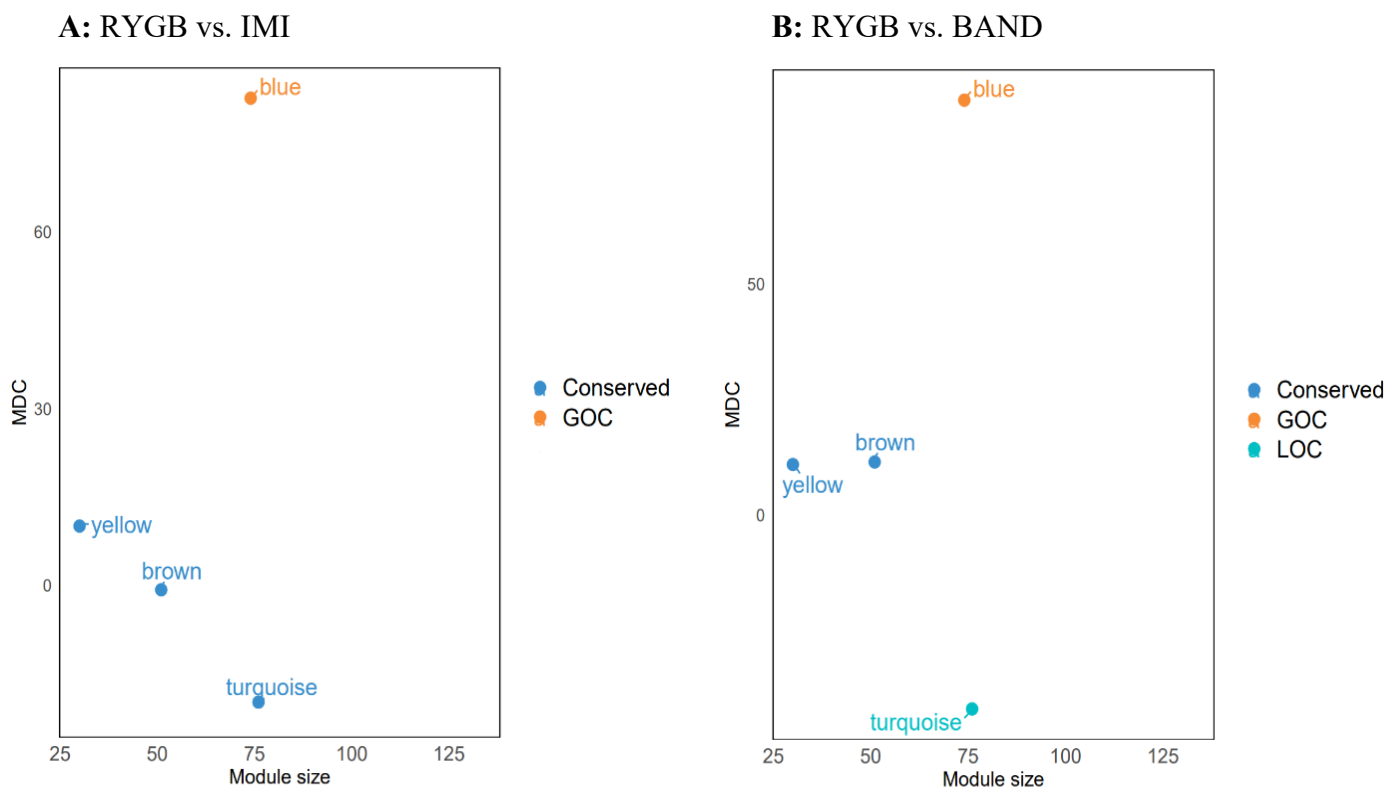

**Figure S5.** Differential metabolites networks (modules) associated with different types of weight-loss interventions. **A:** Compared to participants who underwent IMI, those who underwent RYGB exhibited a significant gain of connectivity (GOC) for metabolites in the blue module (MDC=82.7,  $P=0.001$ ). **B:** Compared to participants who underwent BAND, those who underwent RYGB exhibited a significant gain of connectivity (GOC) for metabolites in the blue module (MDC=89.7,  $P=0.013$ ) and a significant loss of connectivity (LOC) for the metabolites in the turquoise module (MDC=-15.94,  $P=0.011$ ). Statistical significance of the modular differential connectivity (MDC) was determined by 1,000 permutations. Significance level was set to  $P<0.05$ . X-axis: module size (number of metabolites in a module). Y-axis: MDC.
